# Supplementary material for: Multi-omic insights from a multi-ancestry genome-wide meta-analysis of ankylosing spondylitis reveal novel pathways of disease susceptibility
Source: Research Square preprint supplement (doi:10.21203/rs.3.rs-6917334/v1), 2025-07-14

**Figure S2** Locus association plots and linkage disequilibrium patterns with lead SNP in the multi-ancestry meta-analysis.


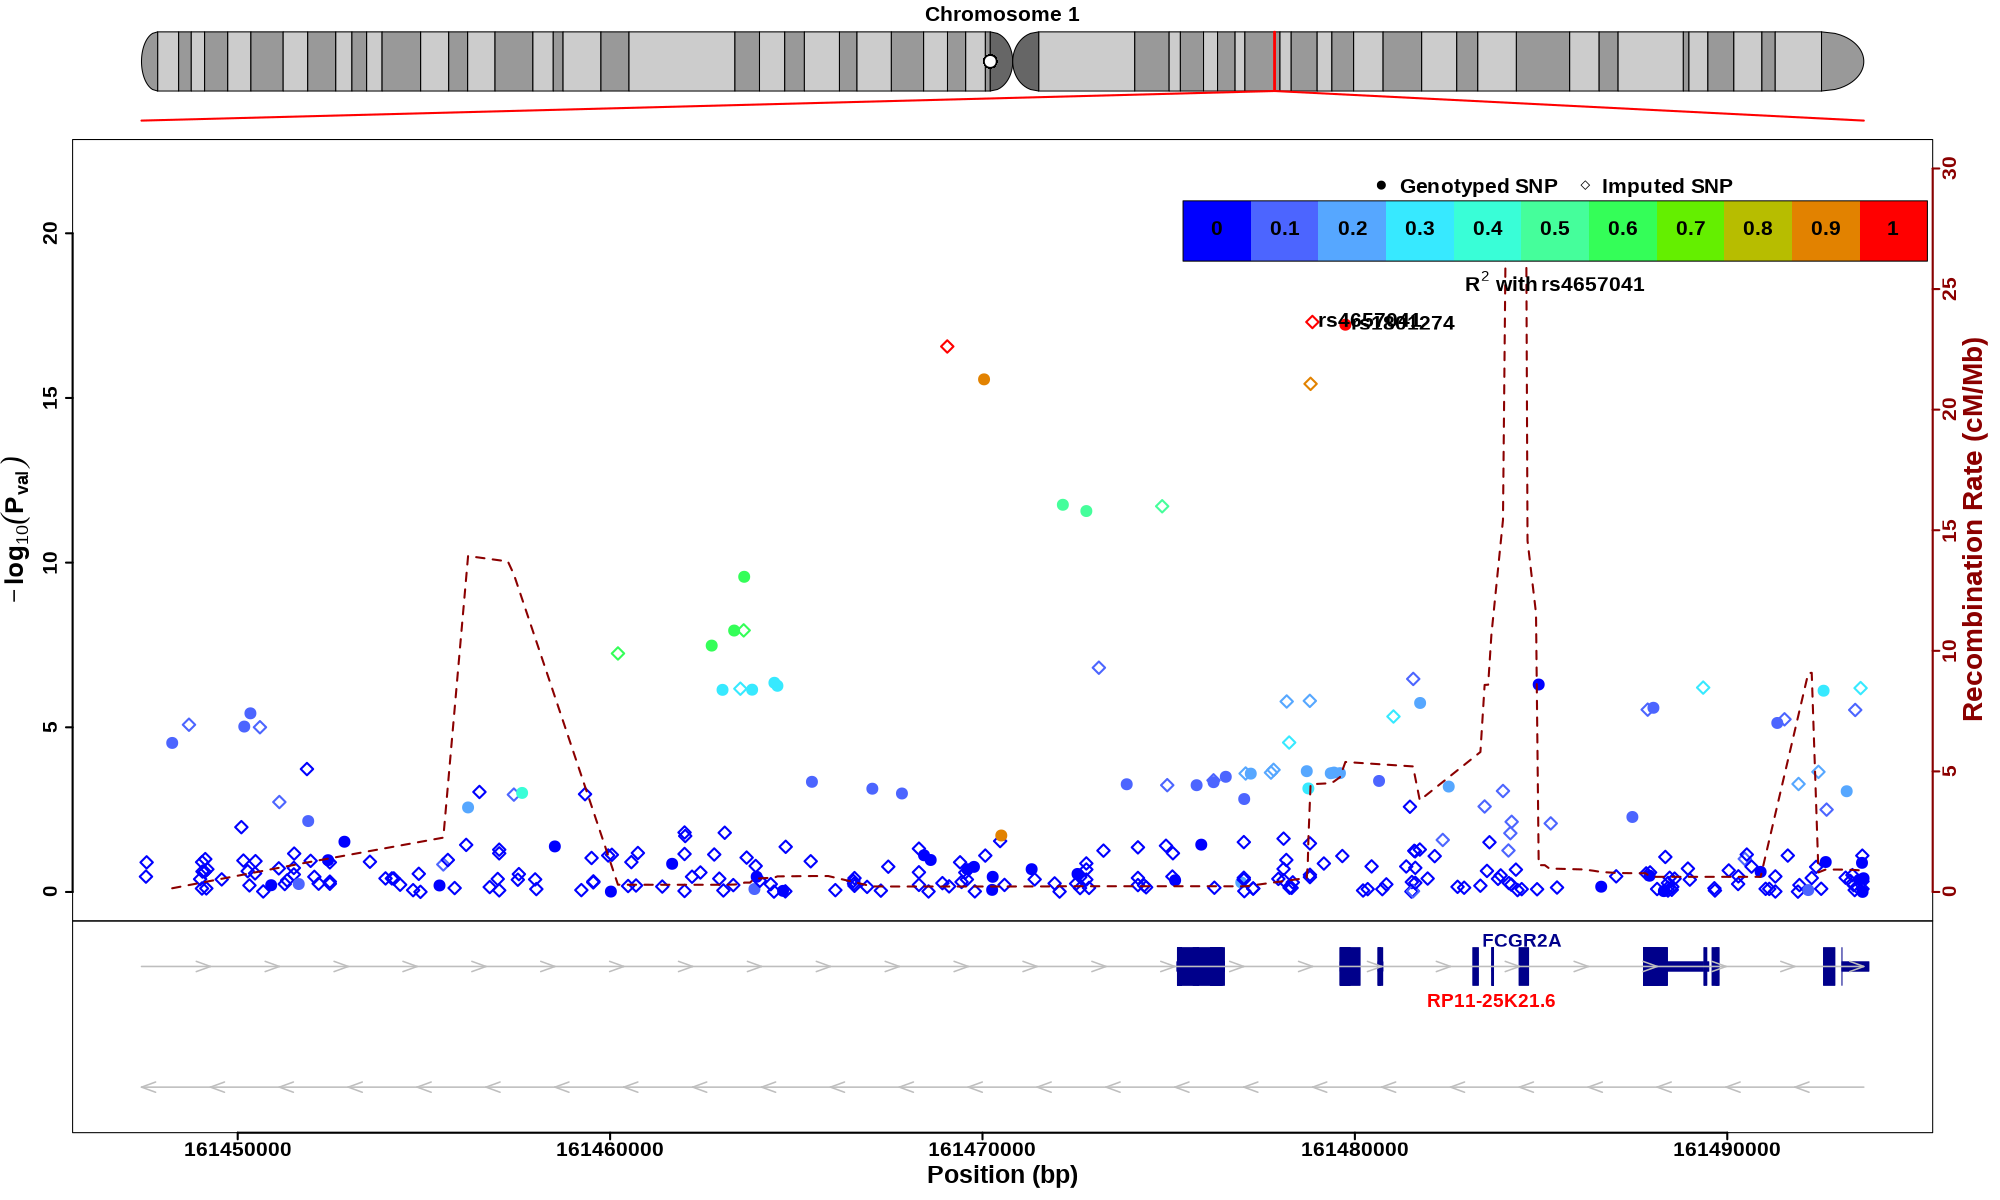

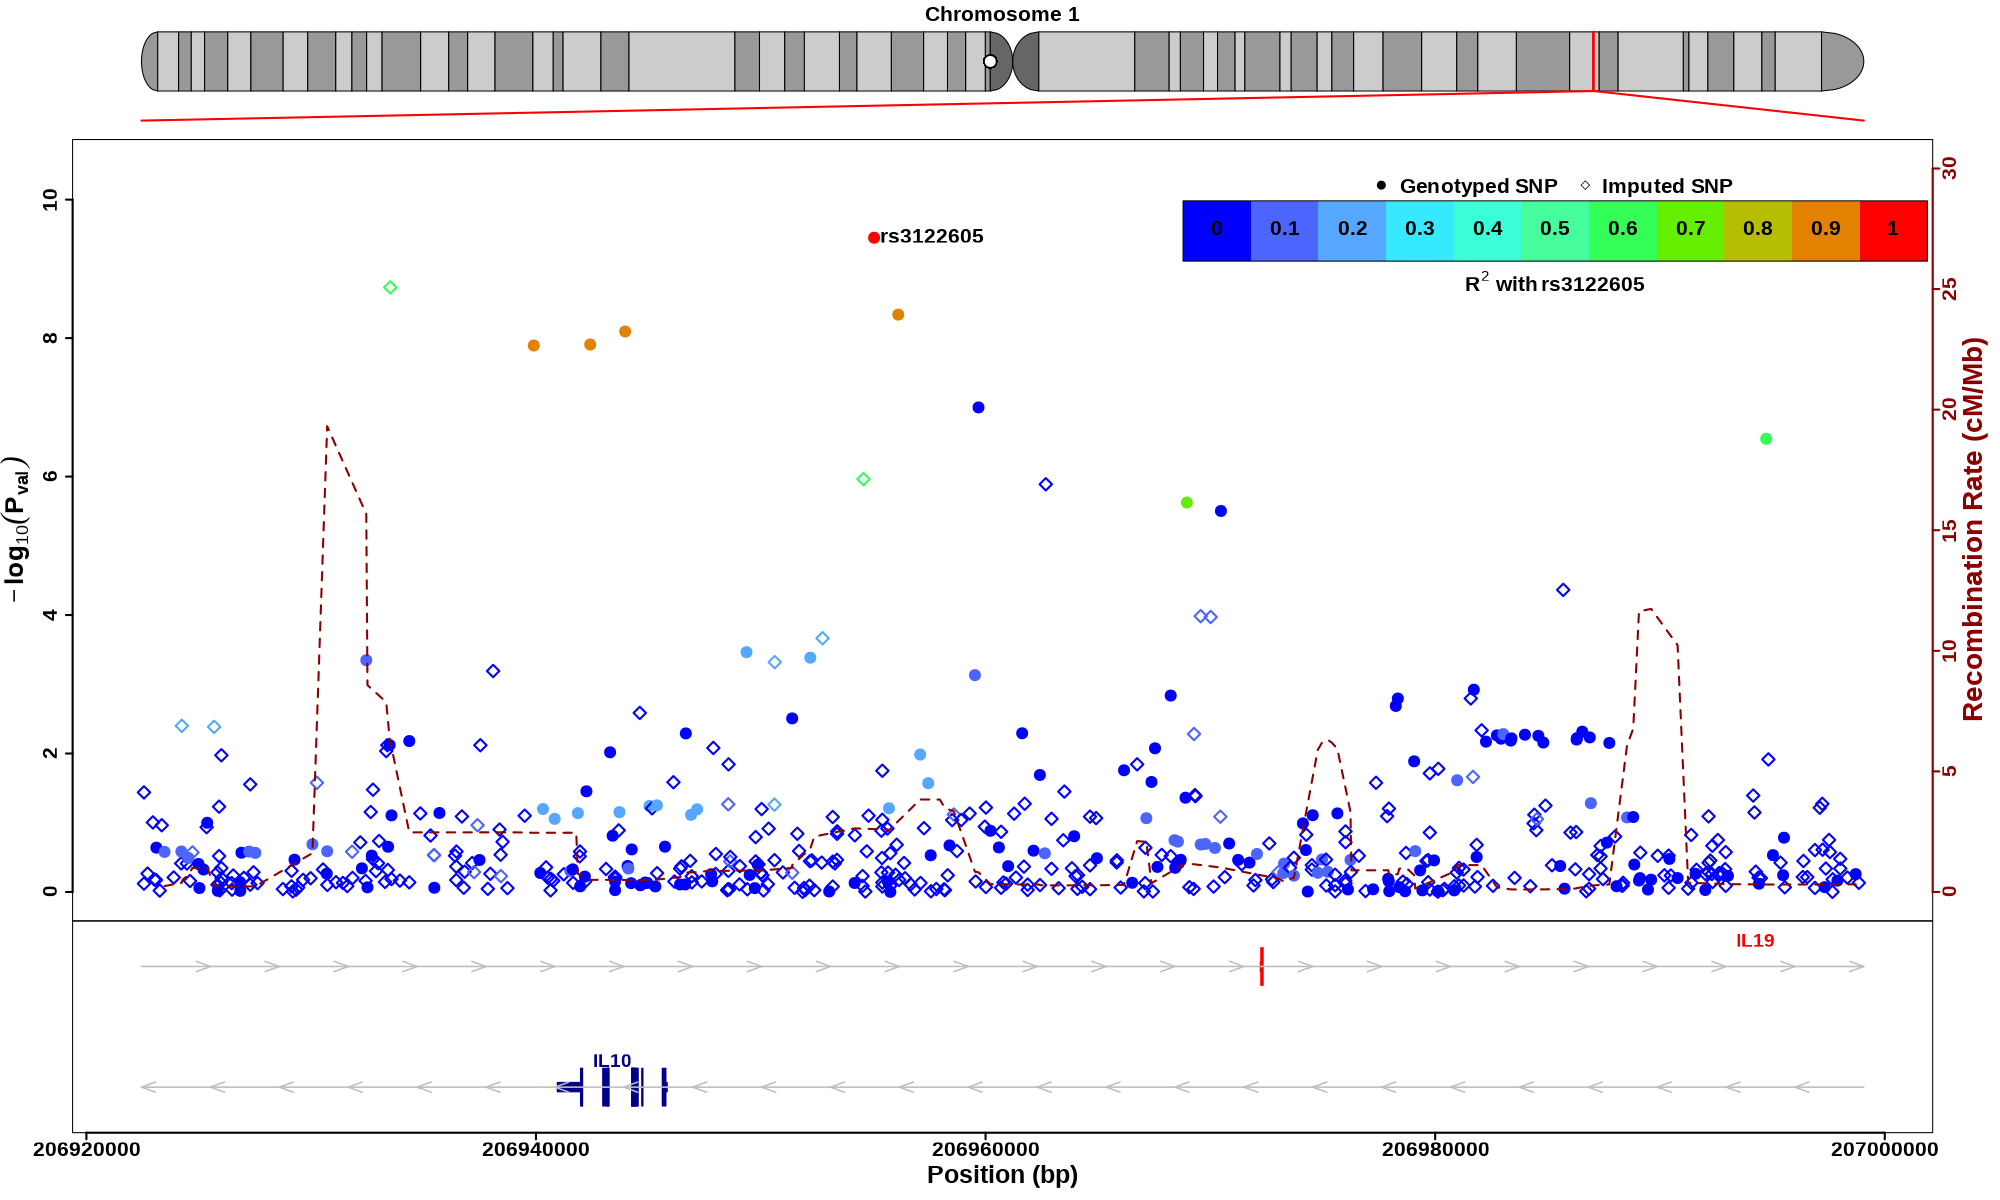

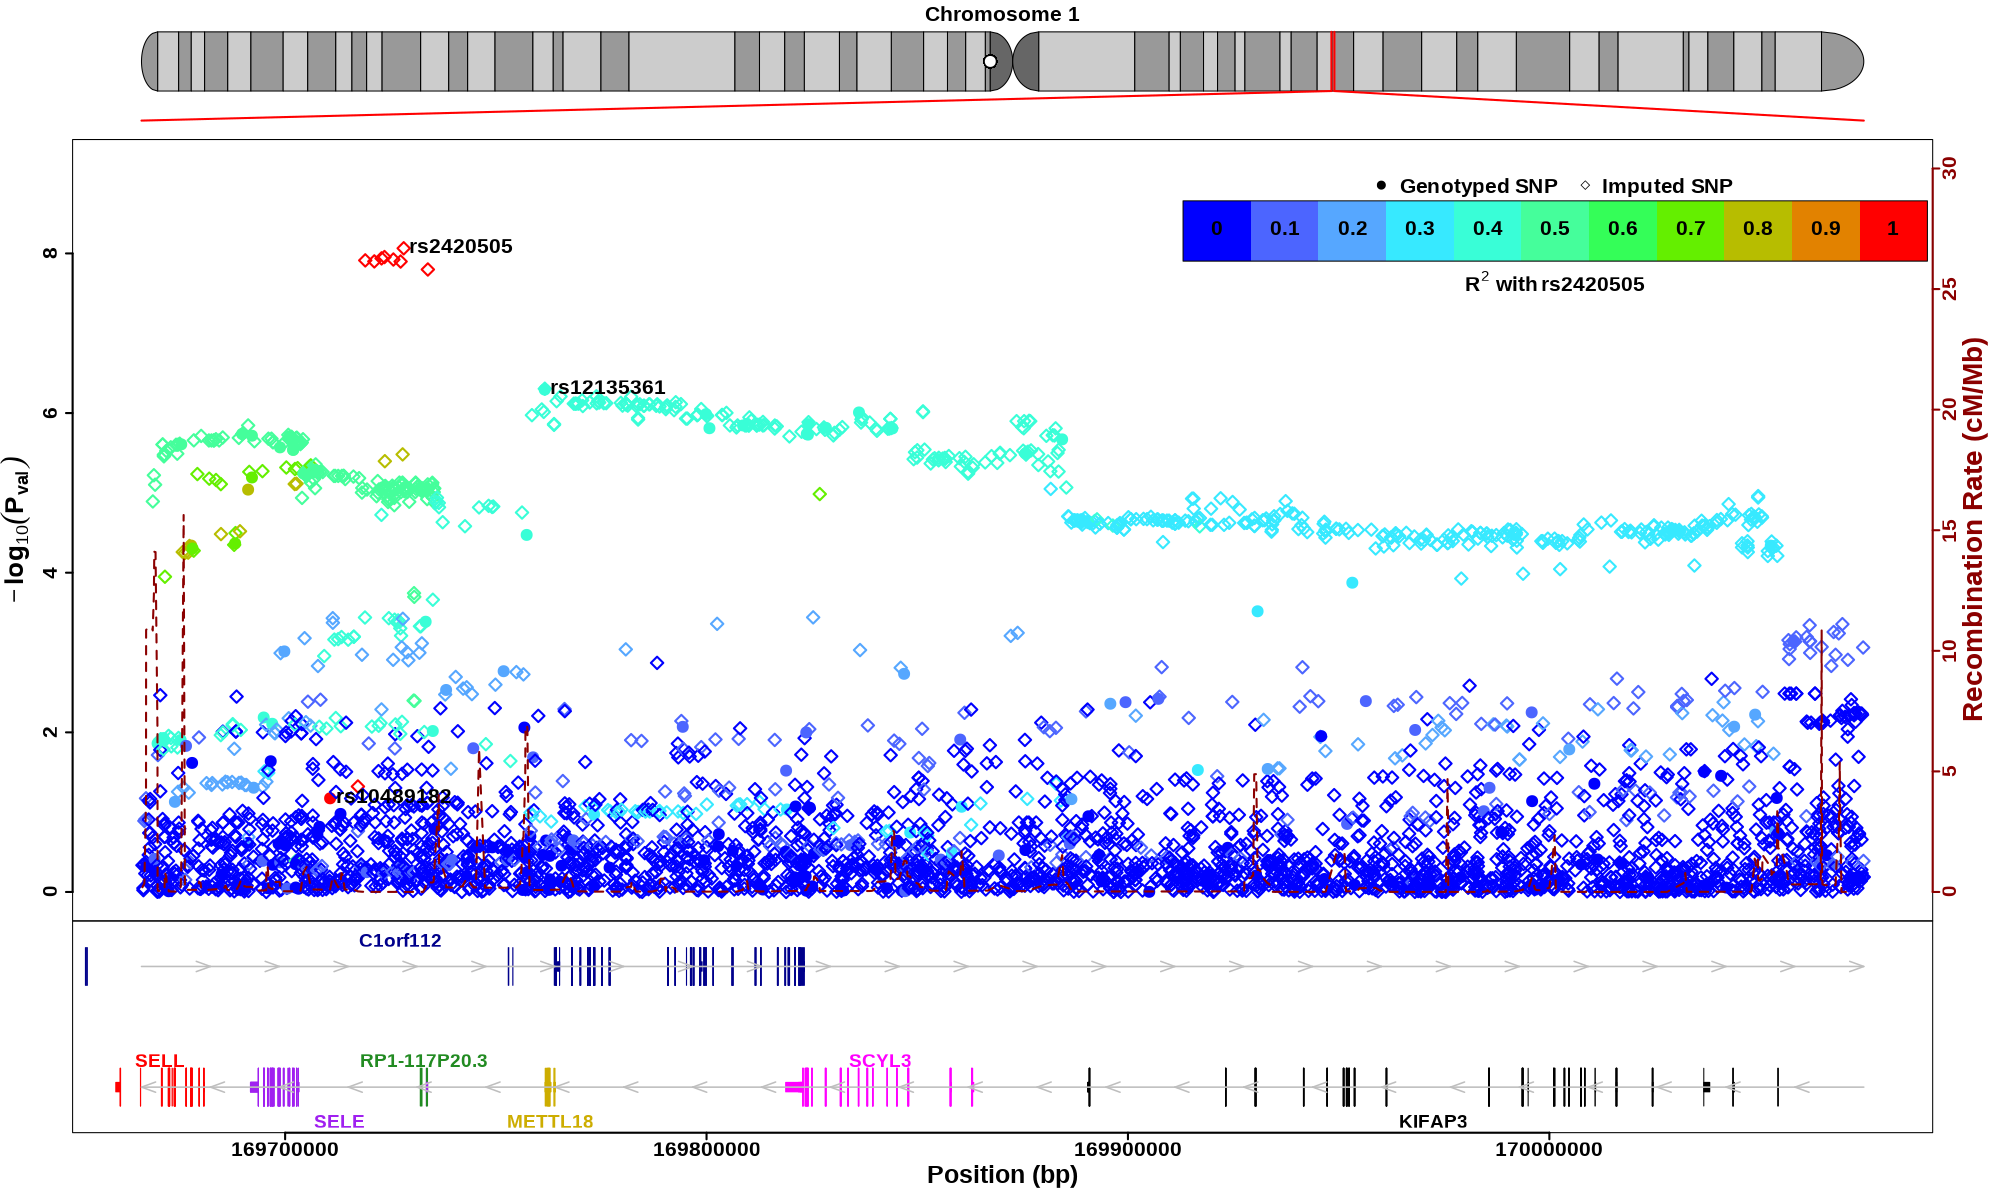

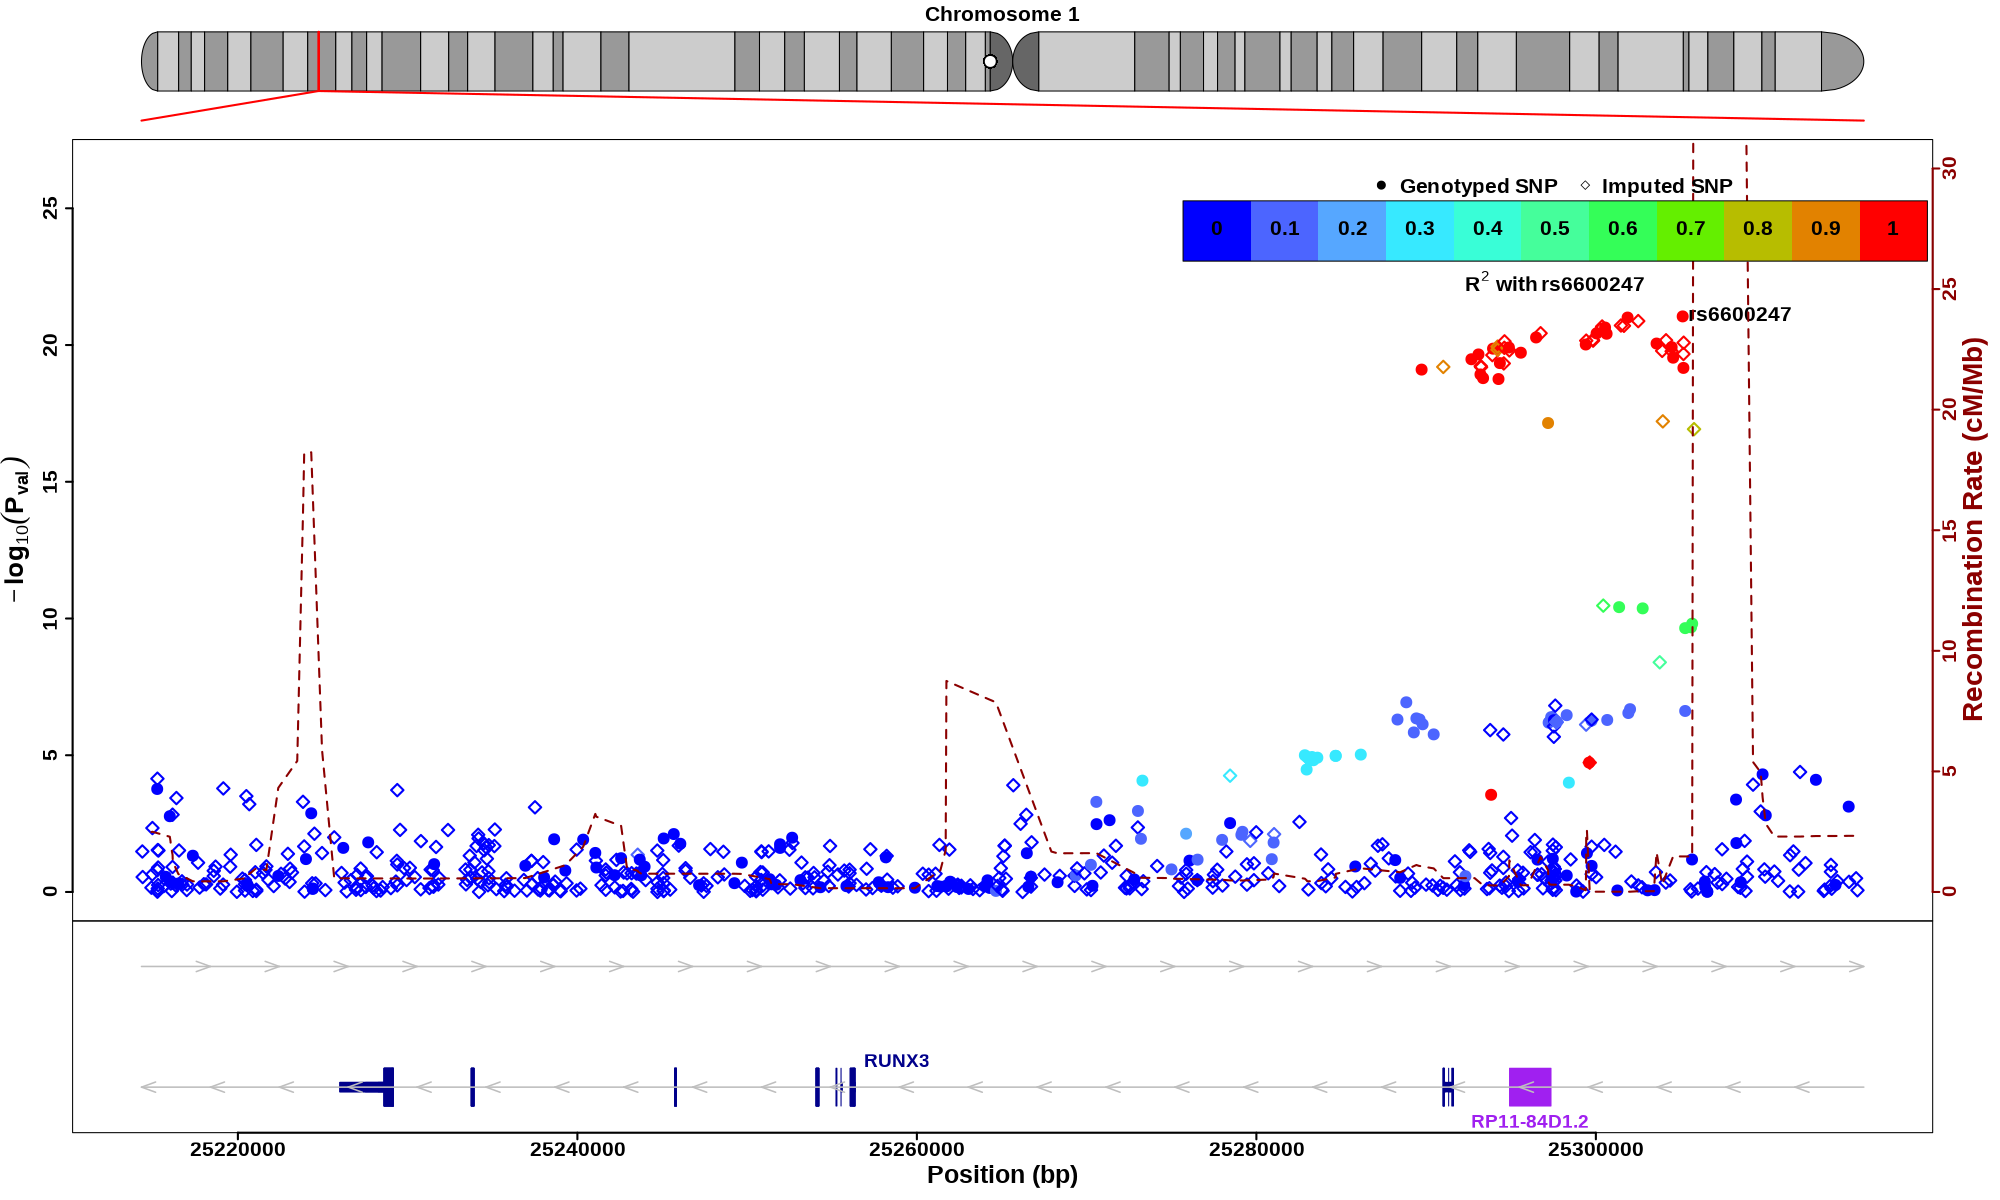


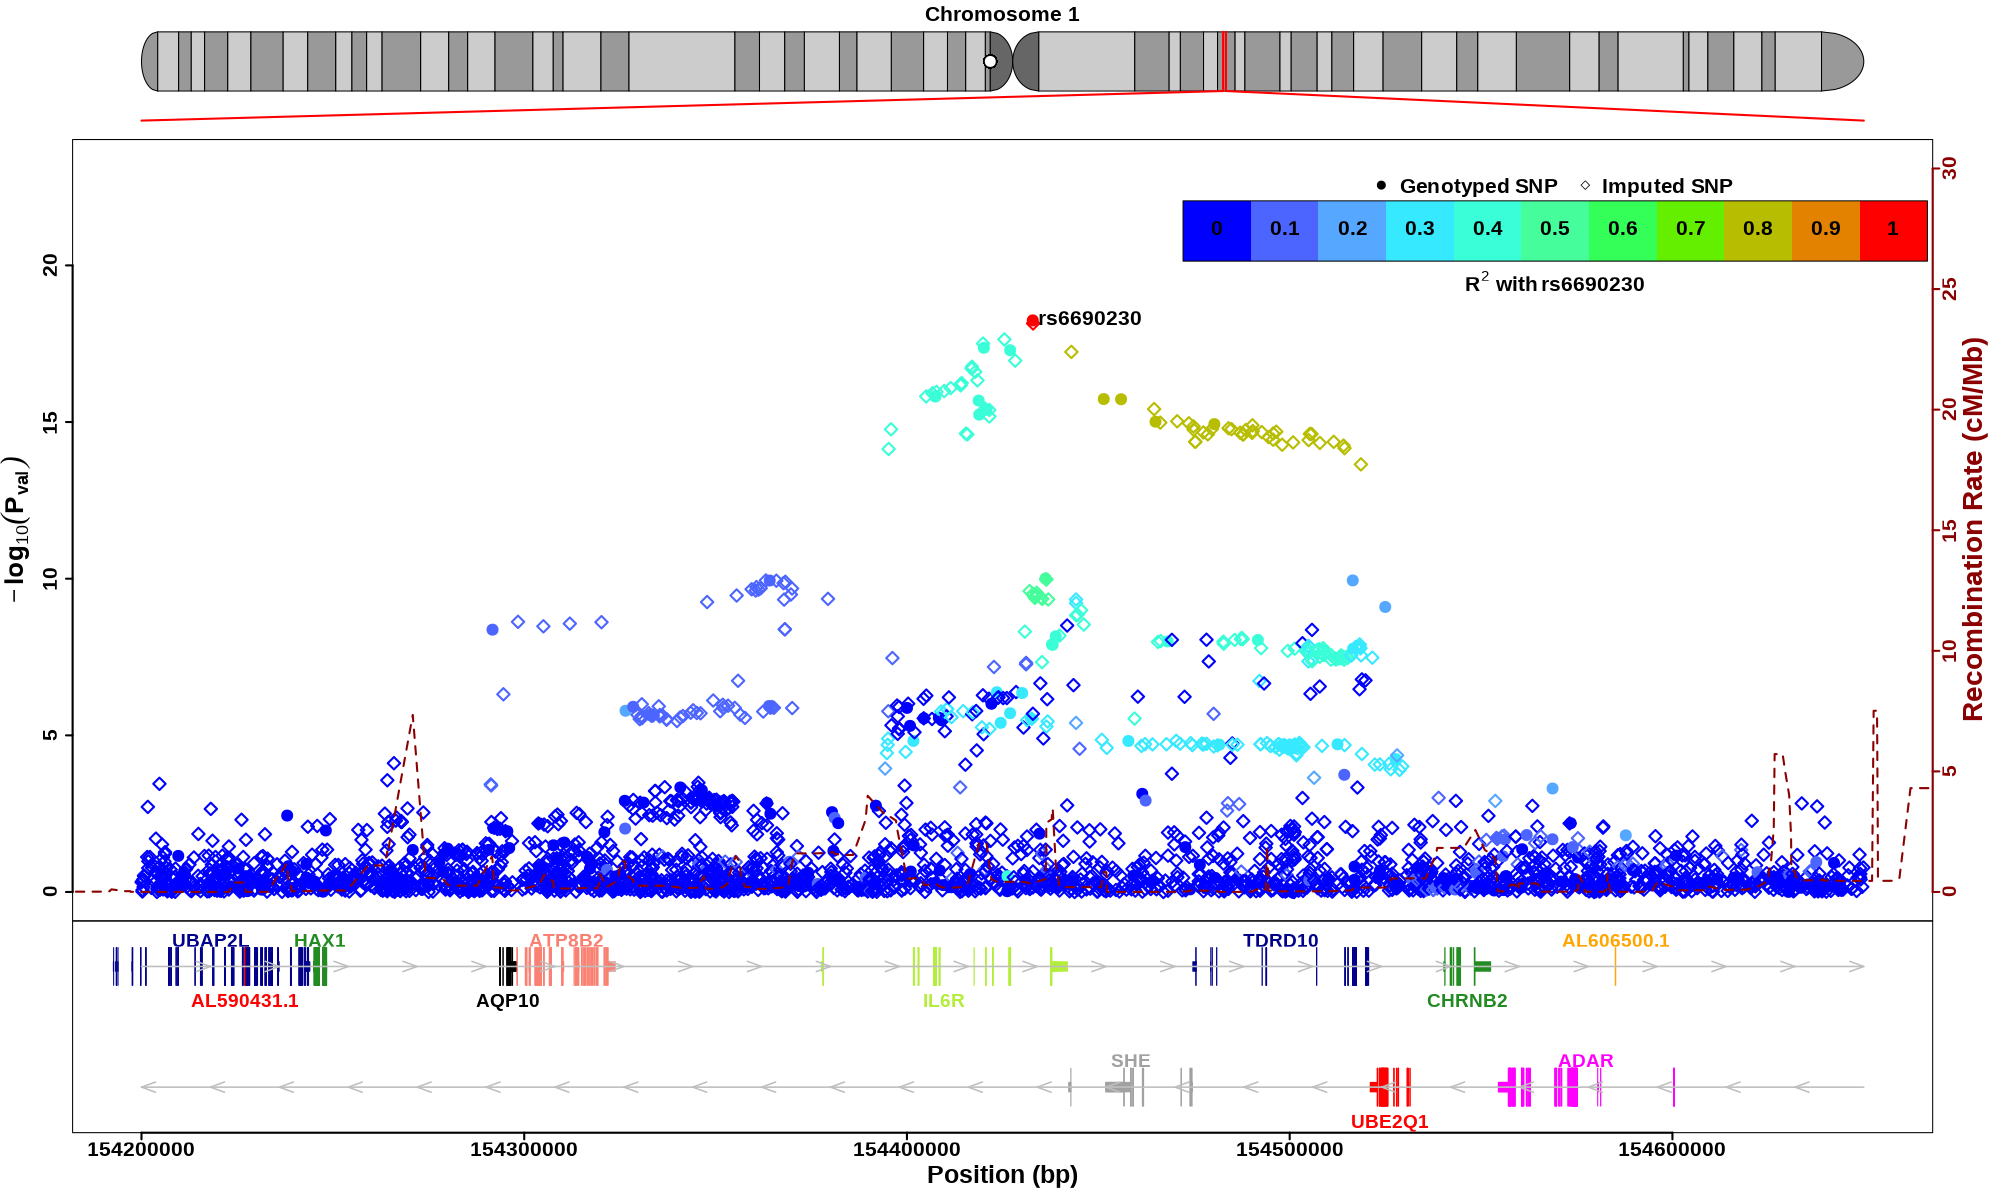

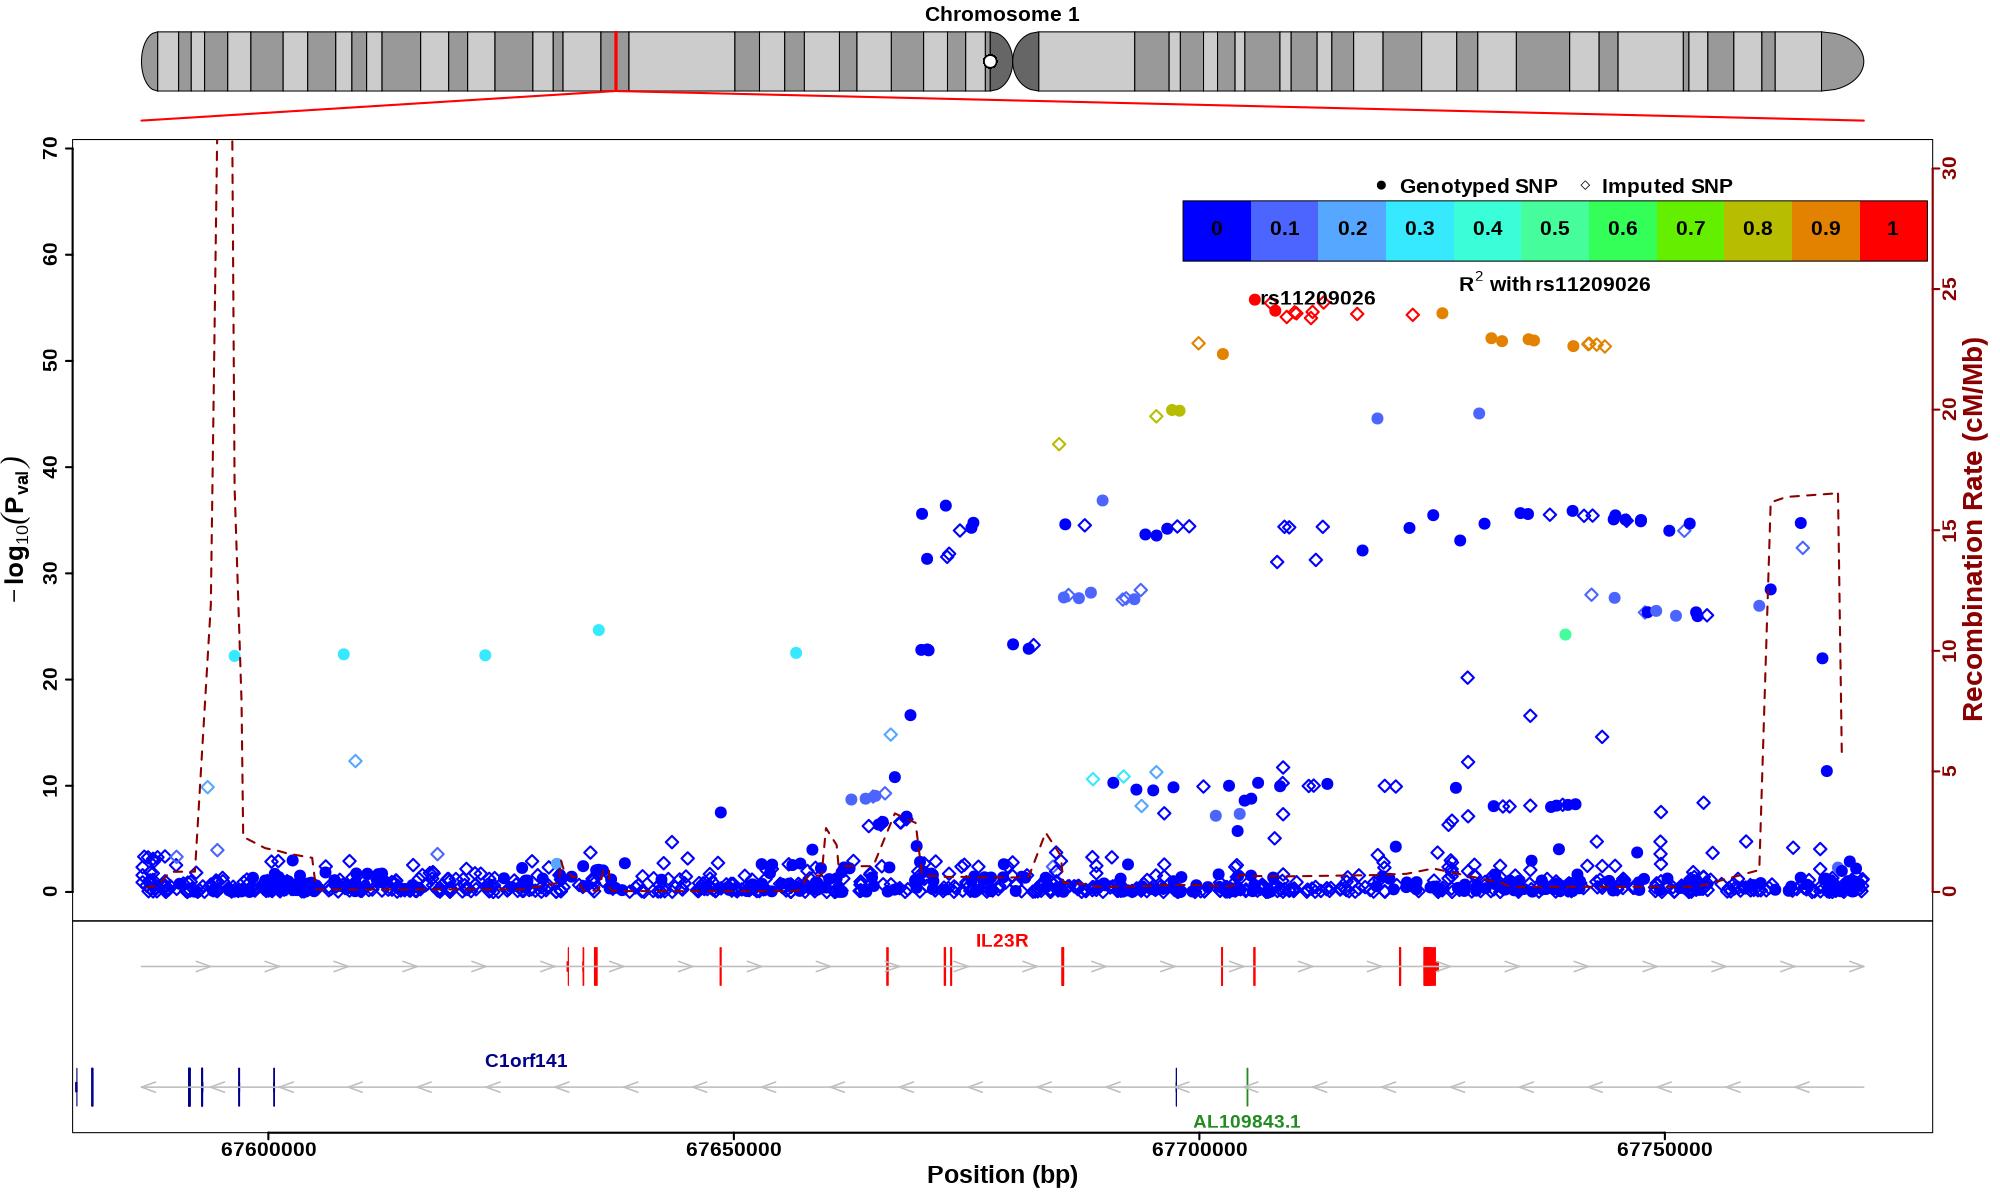

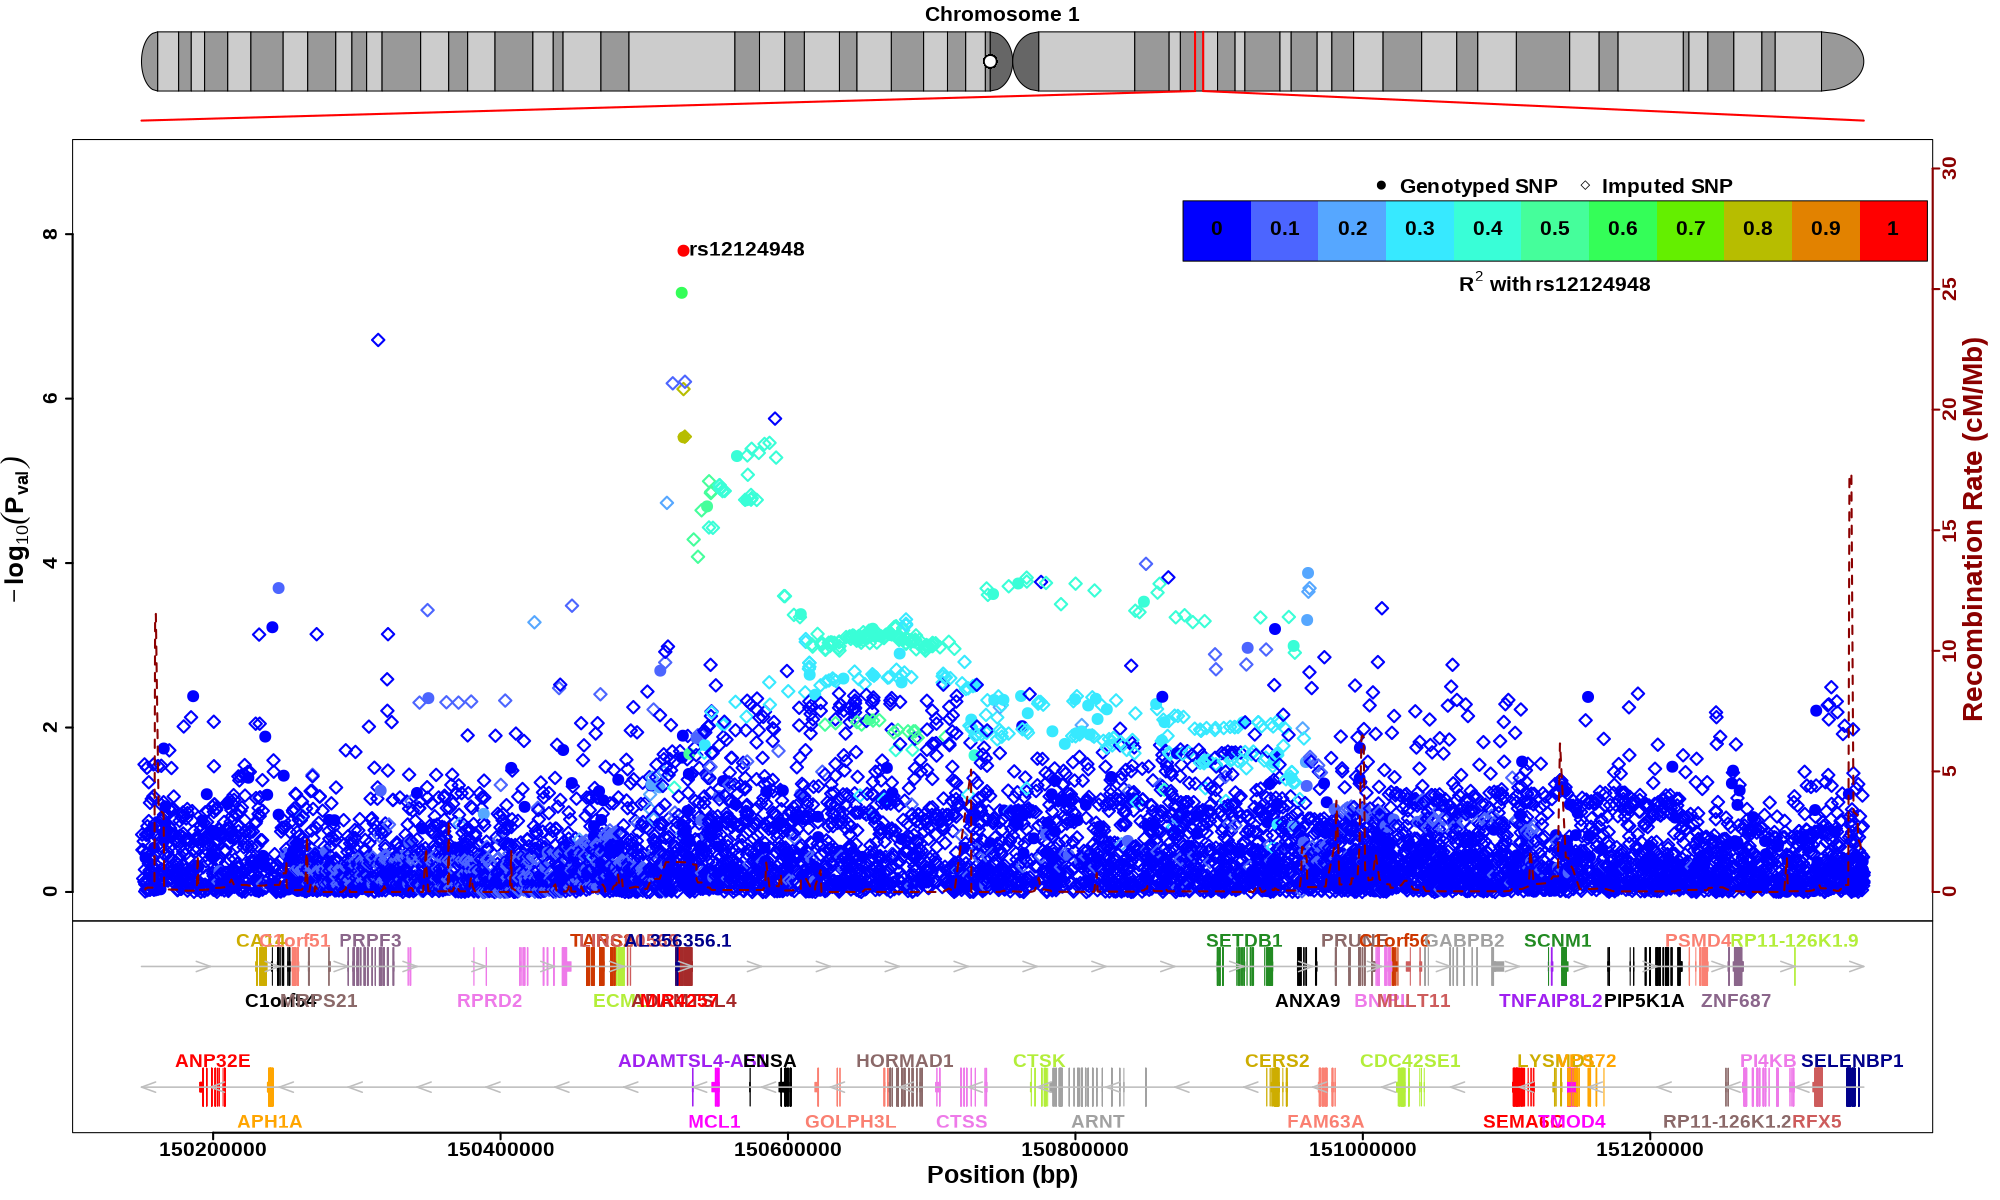

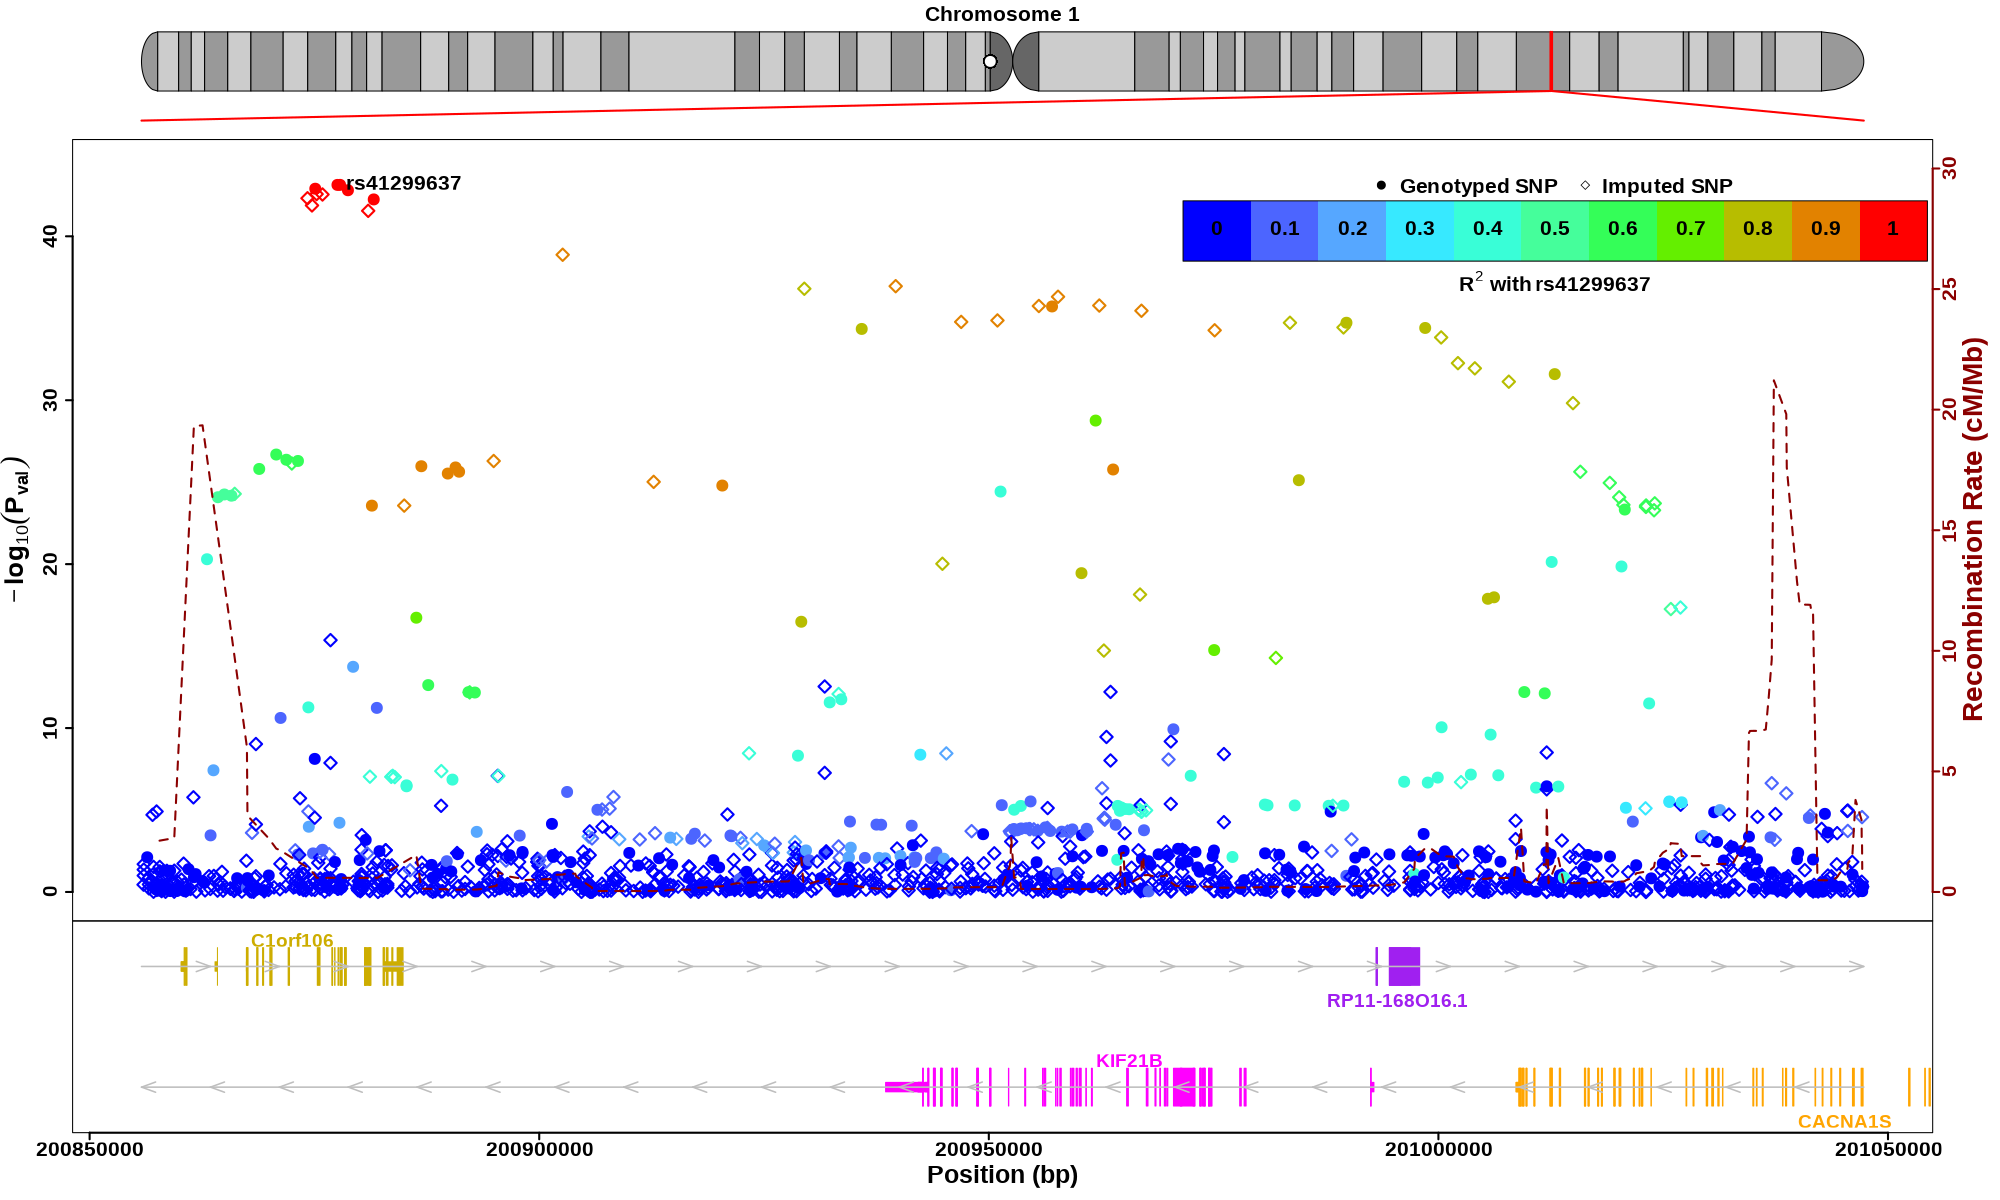

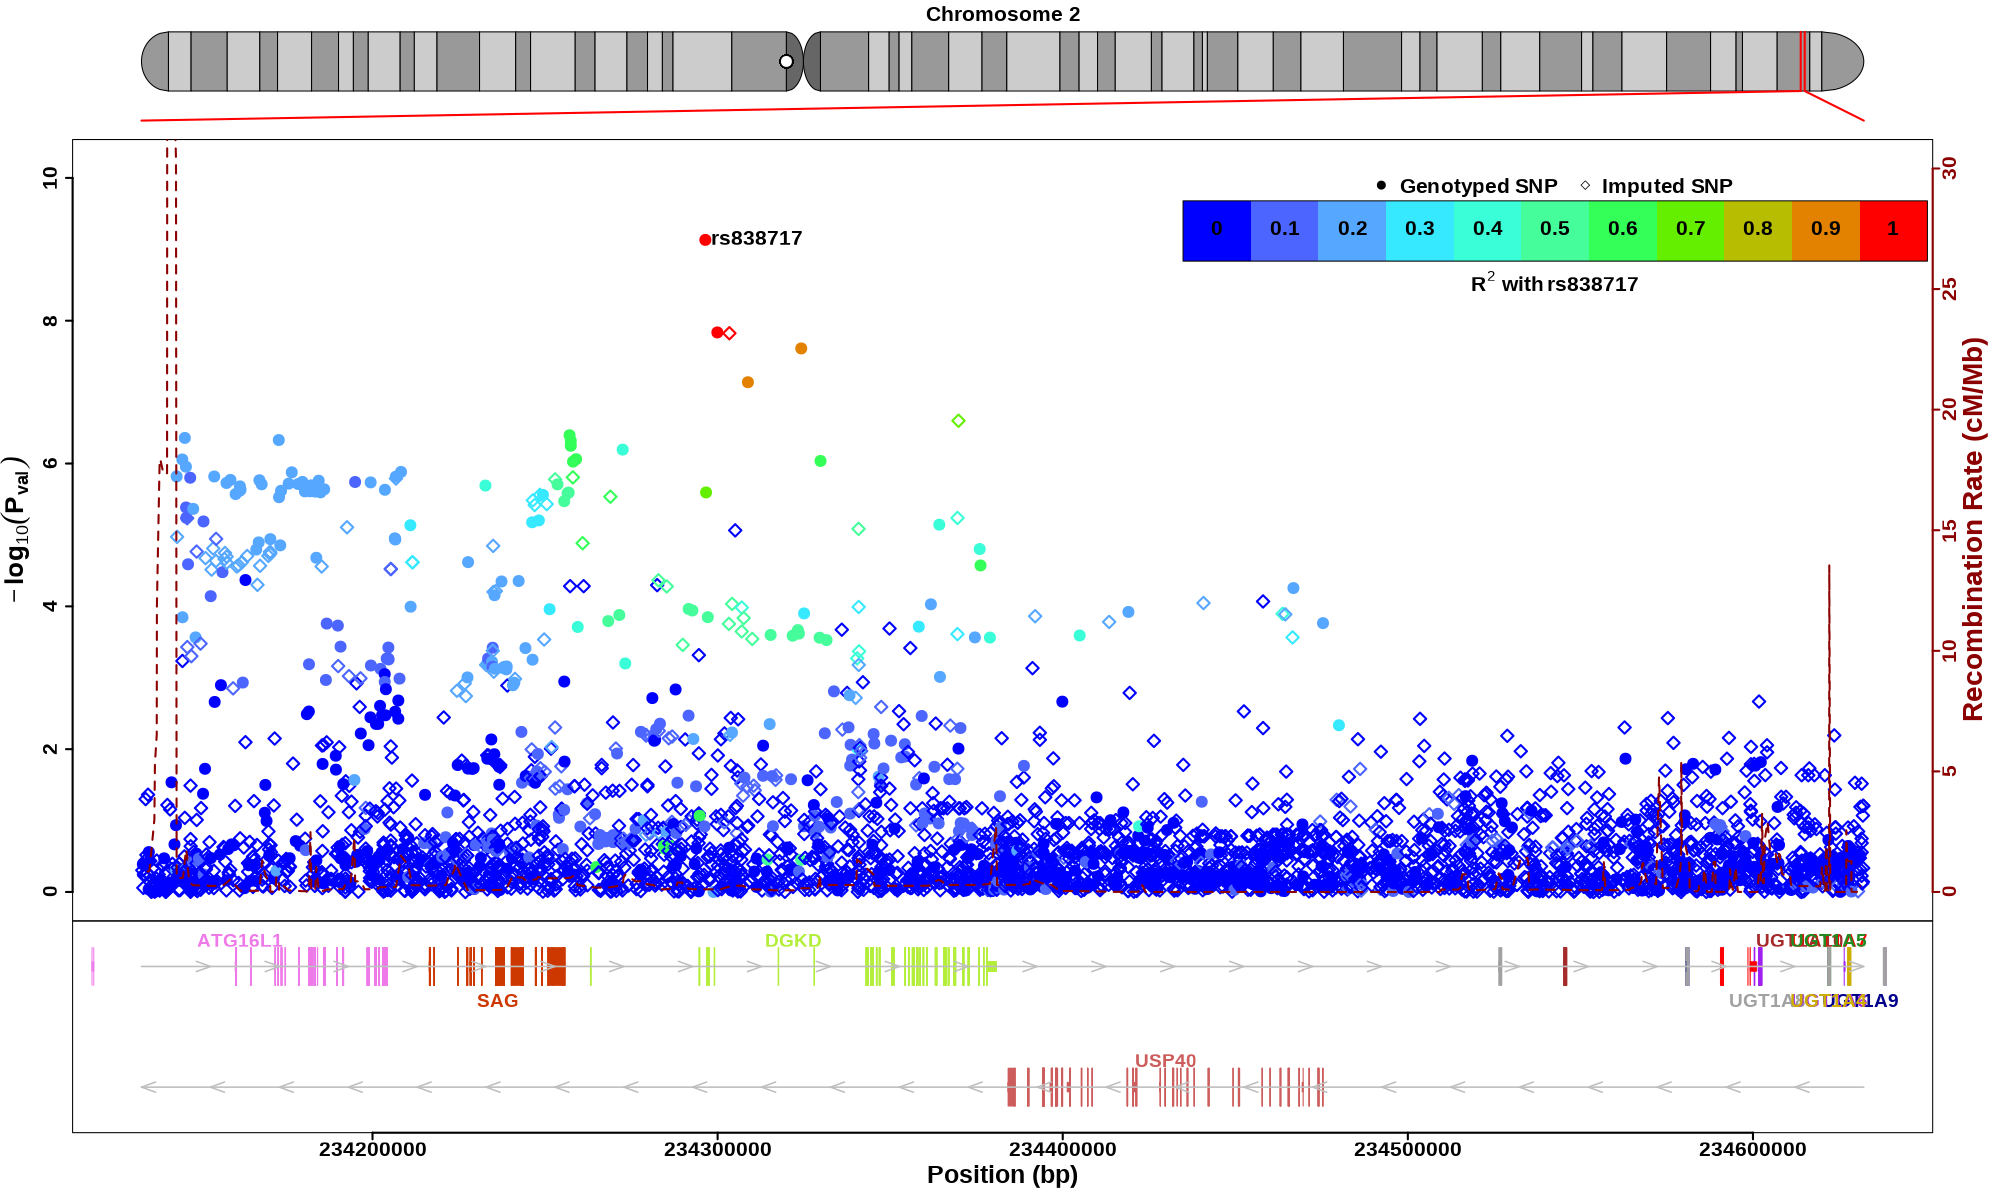

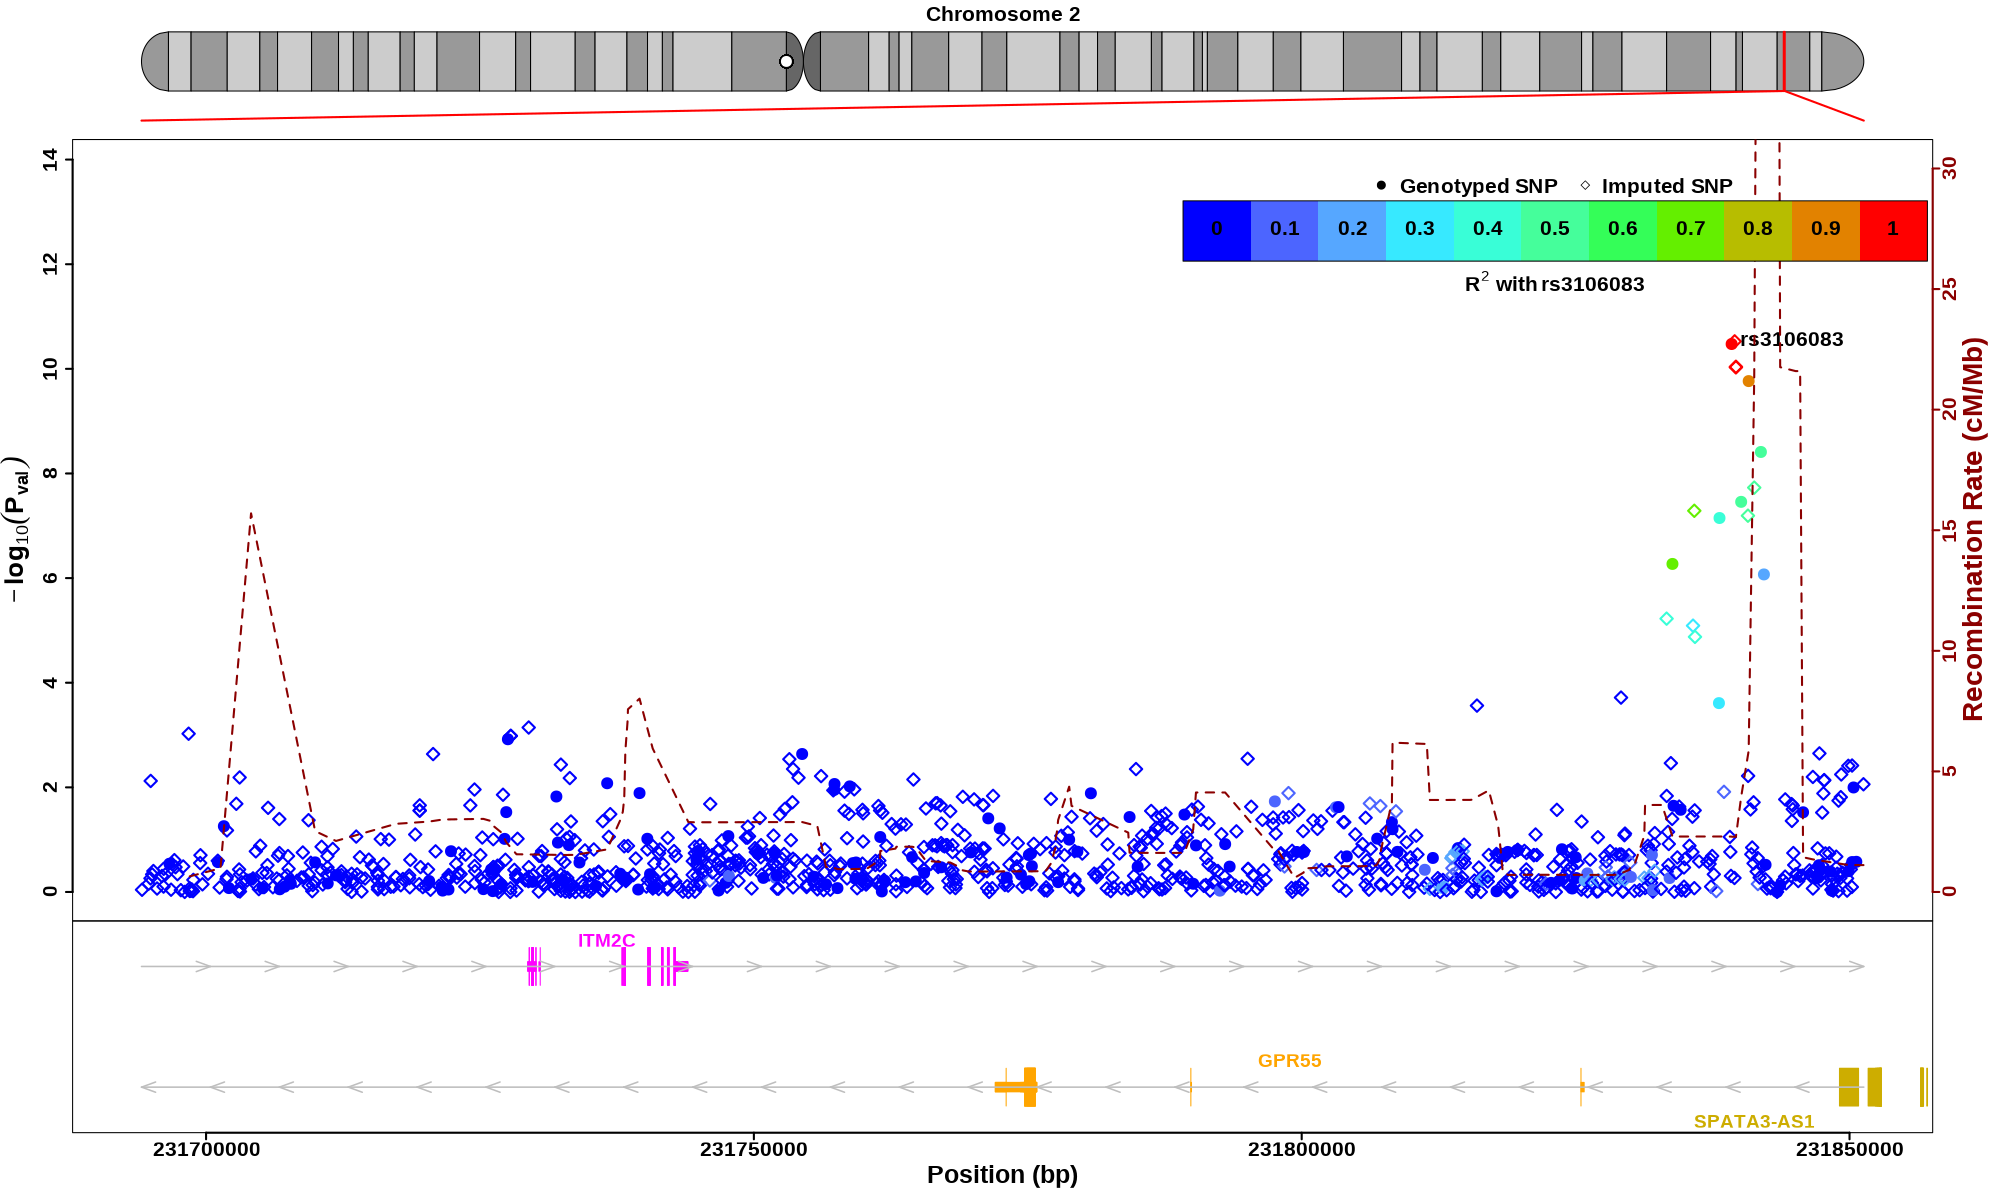


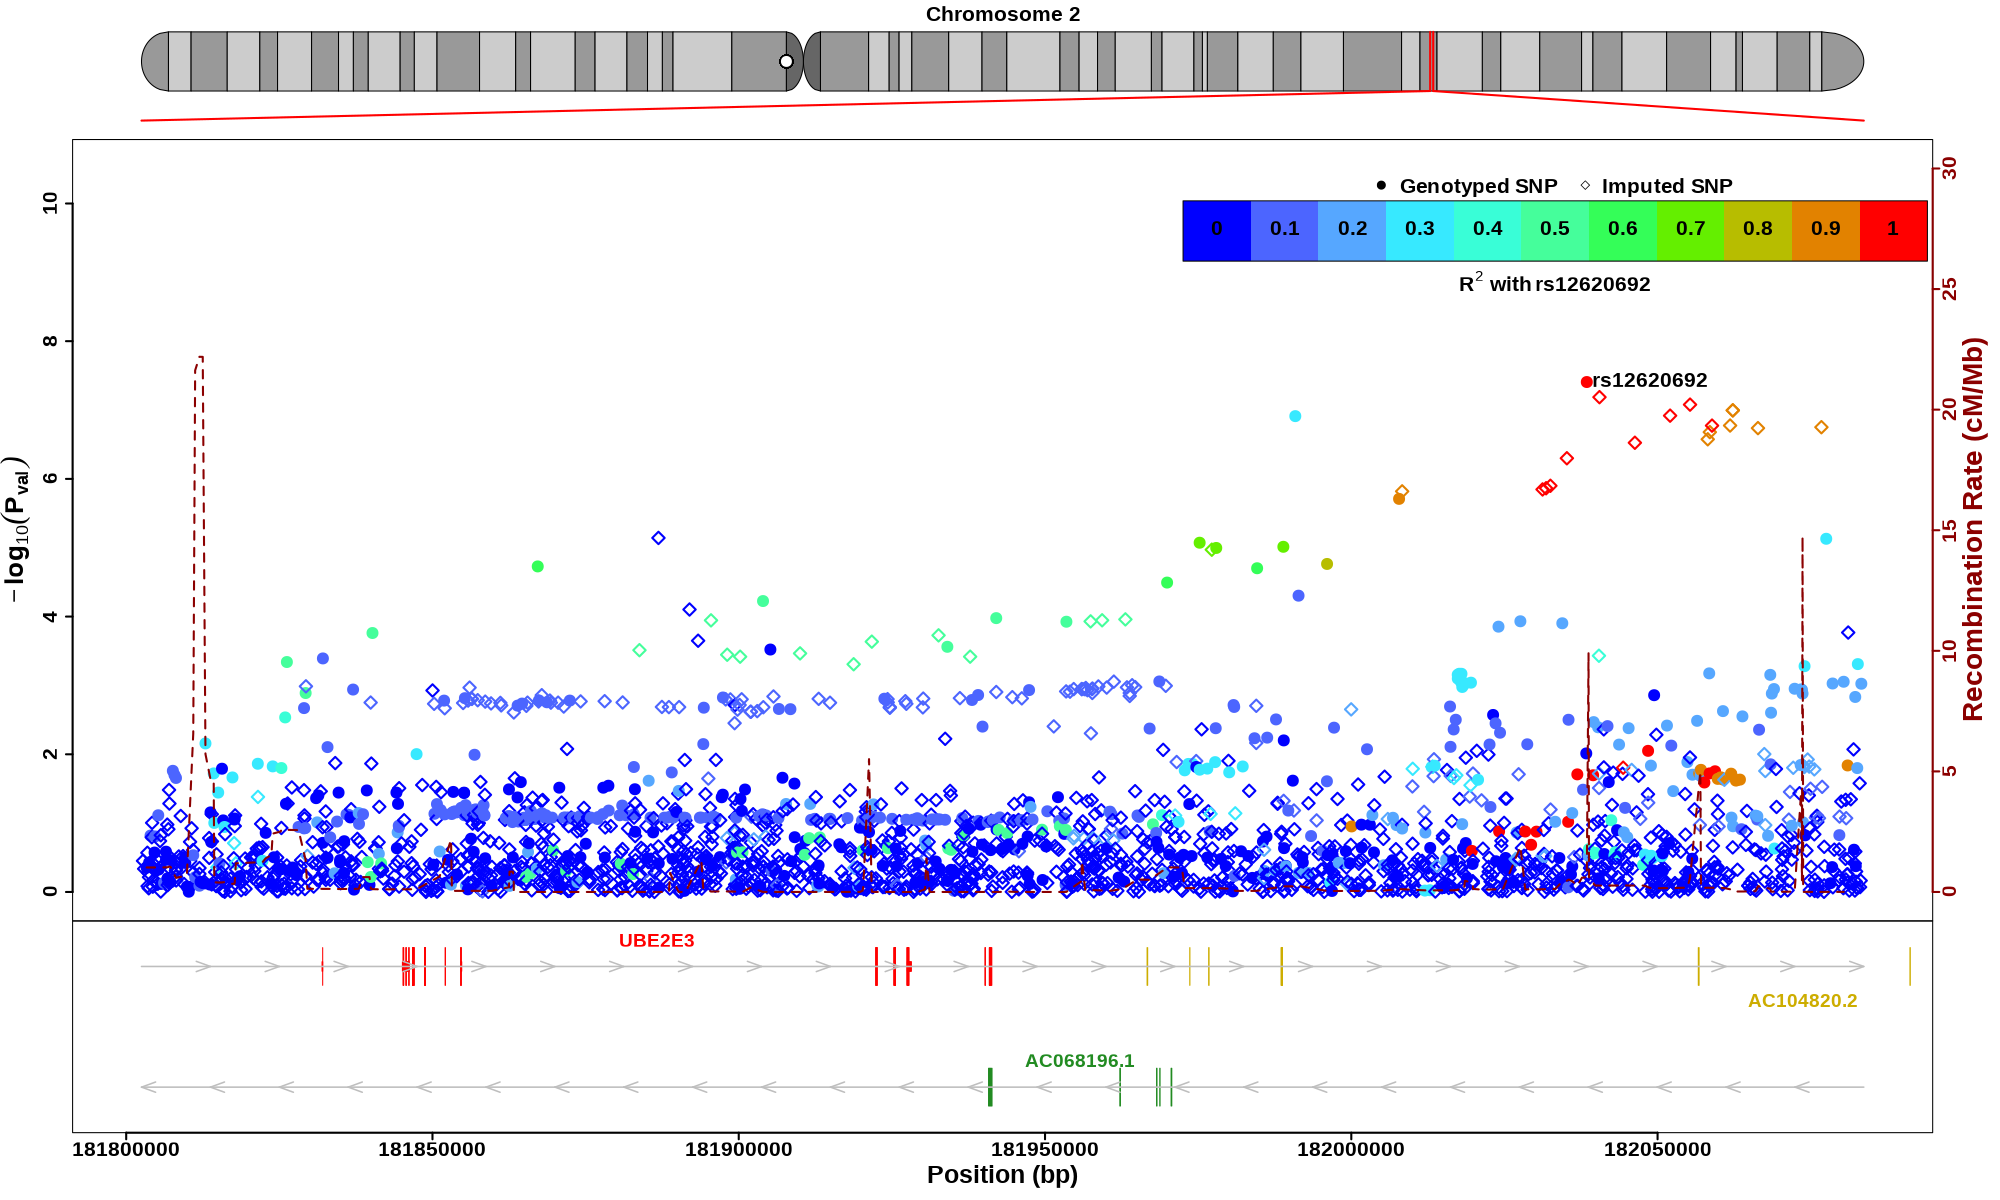

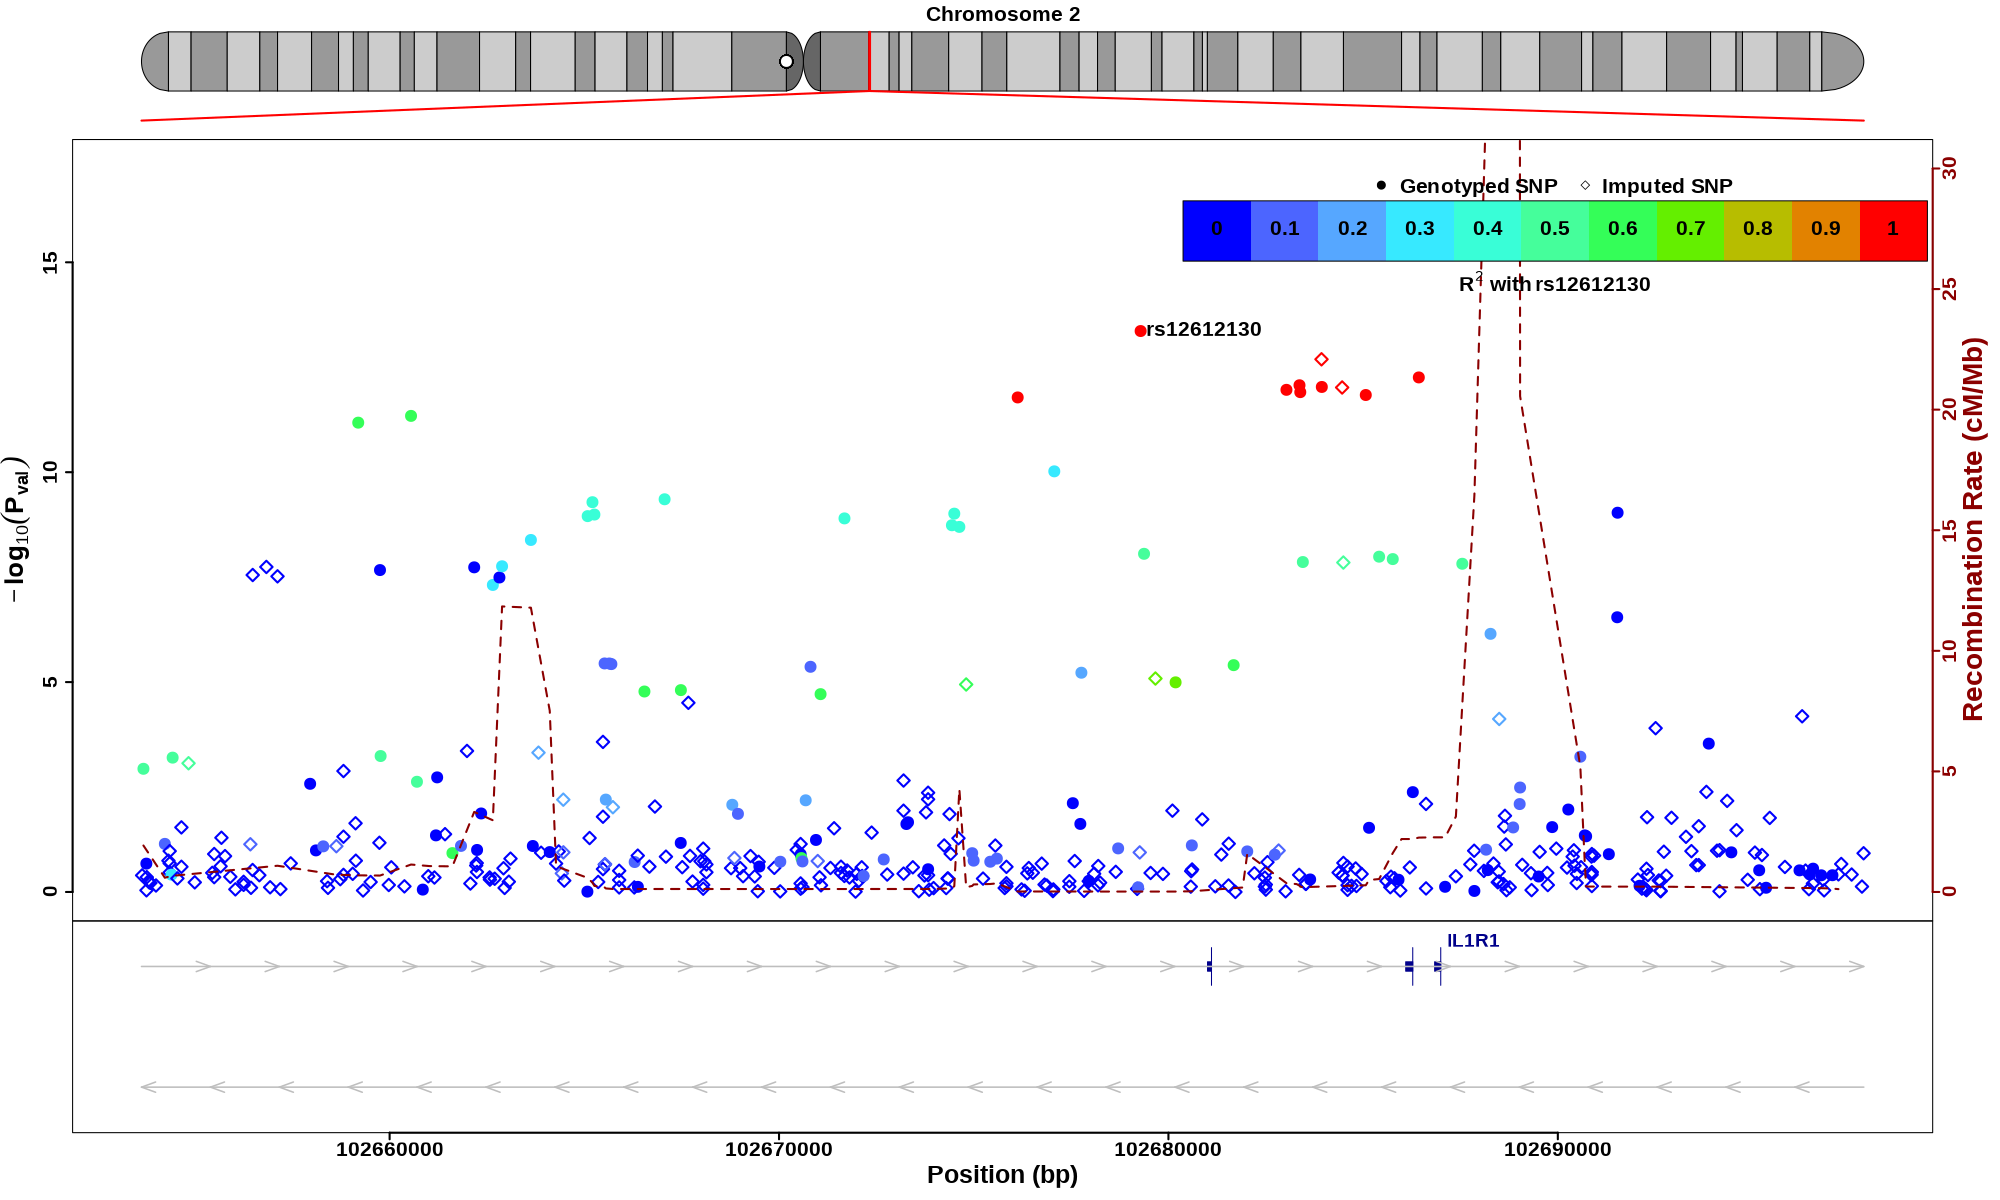

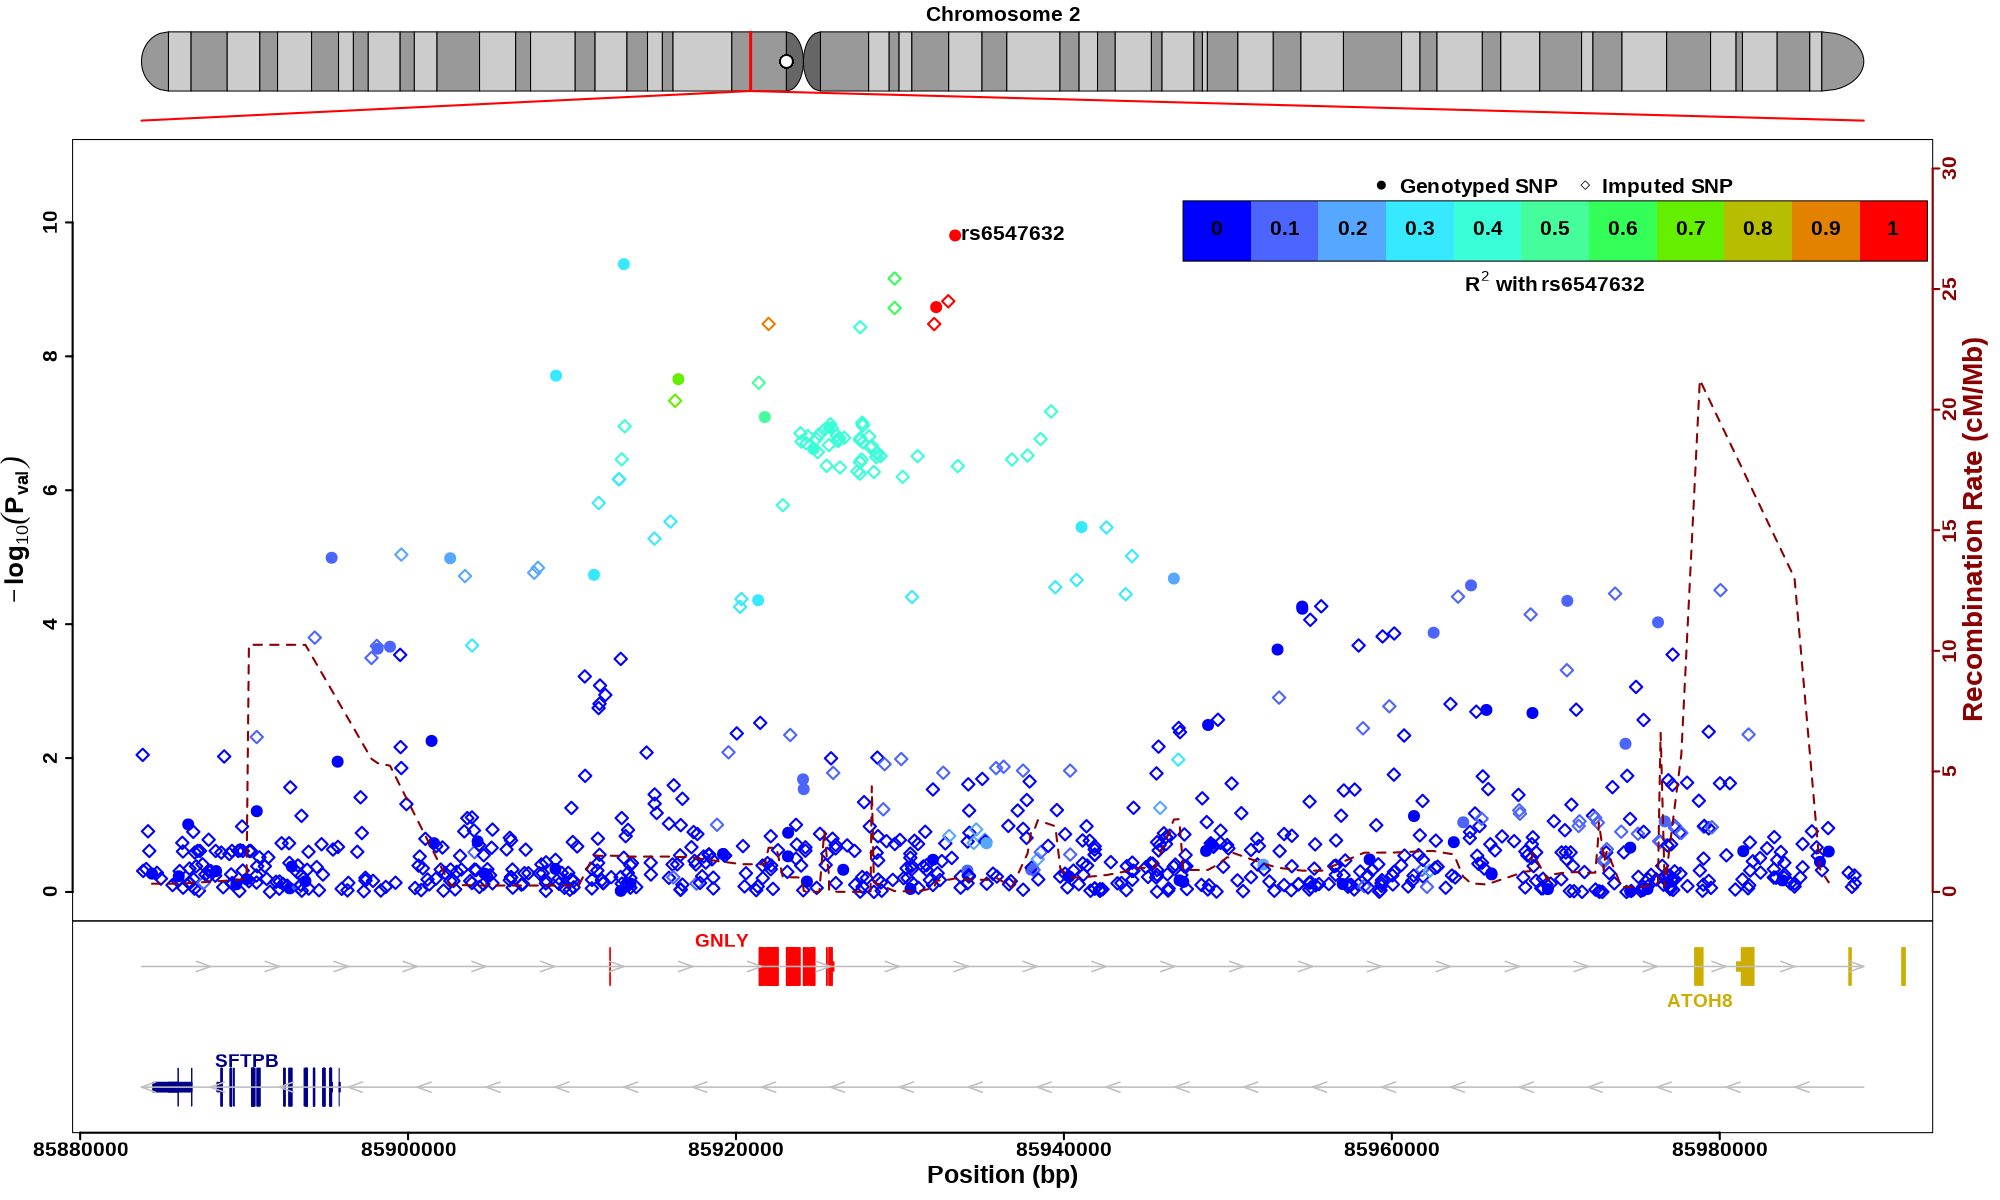

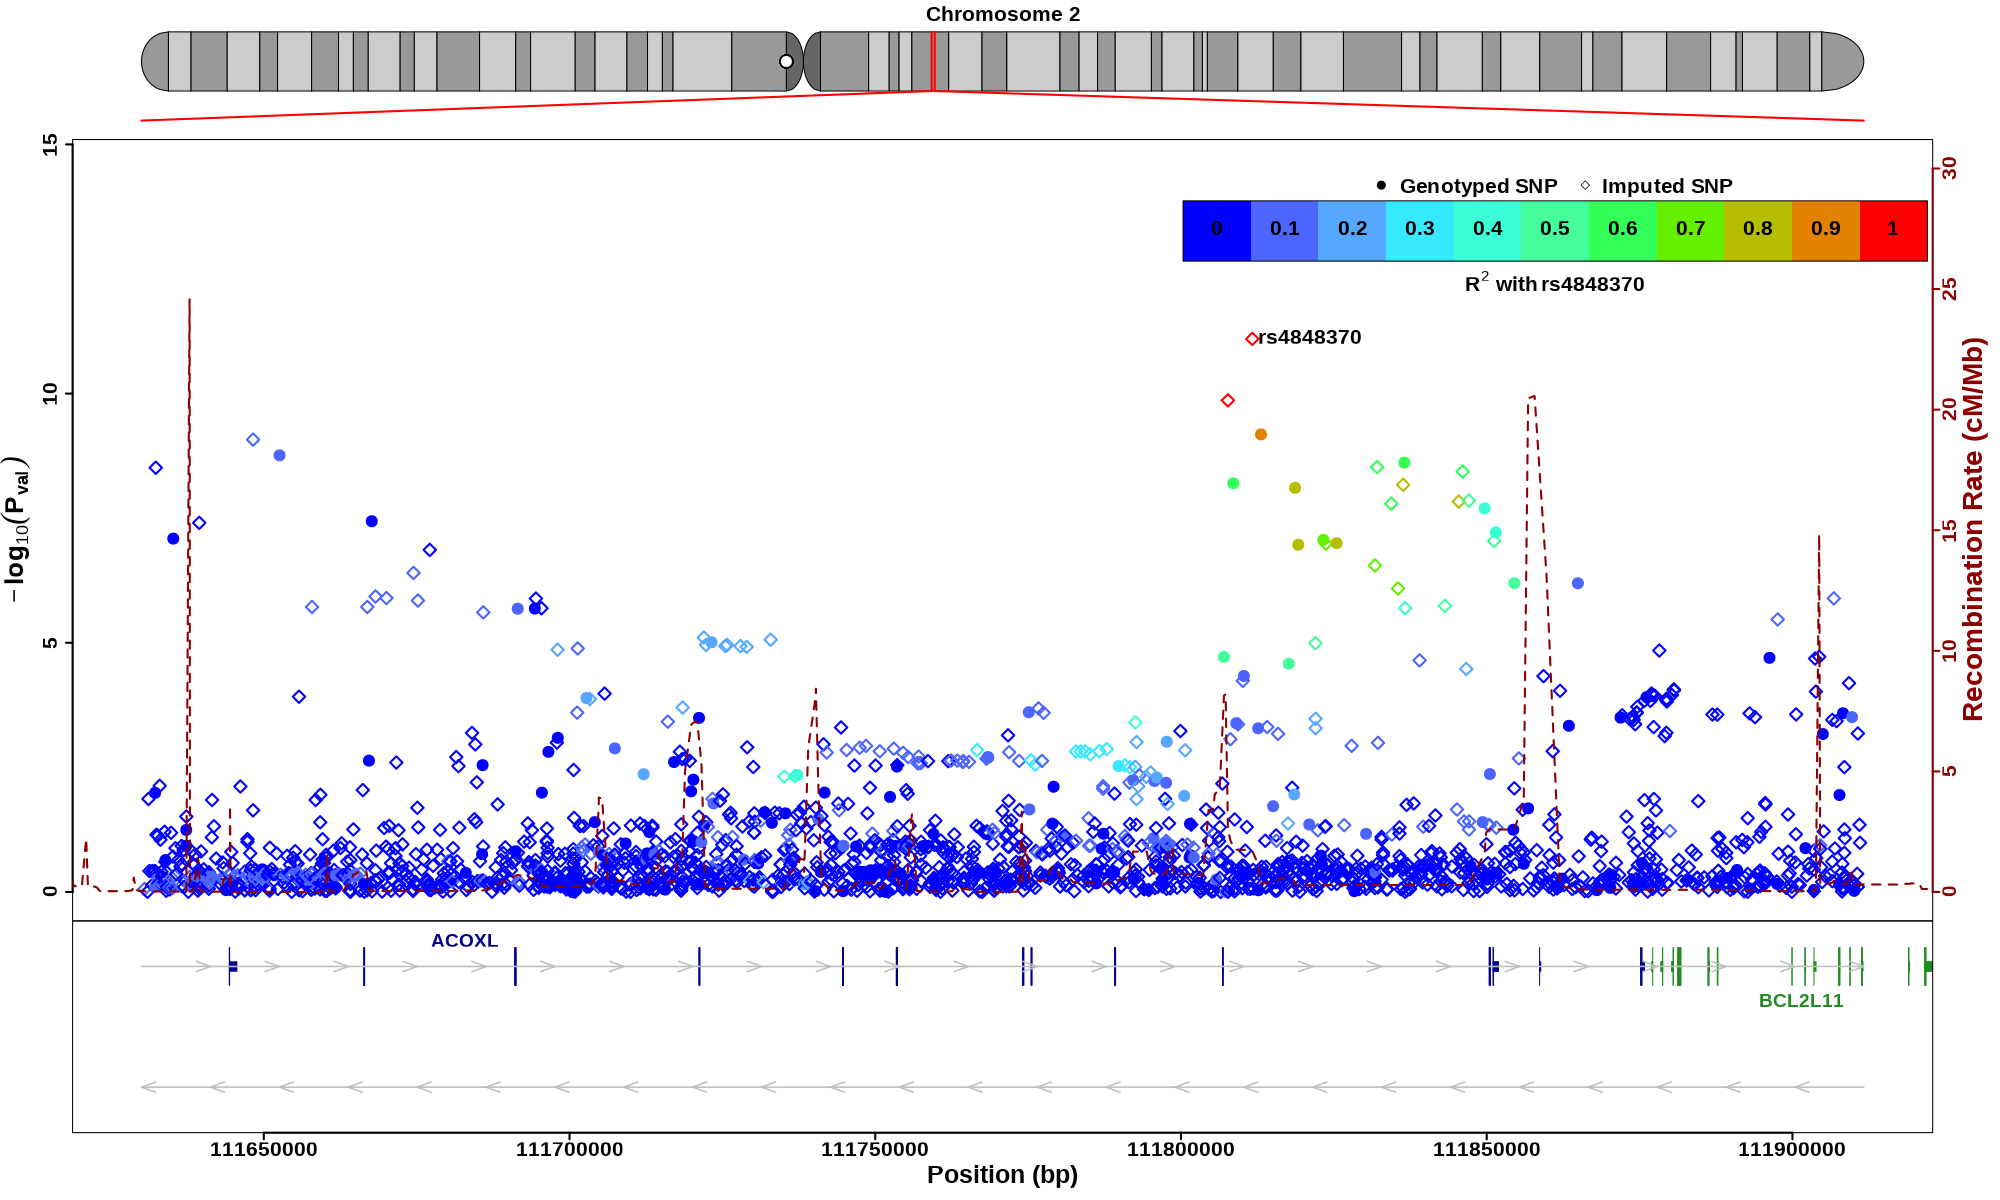

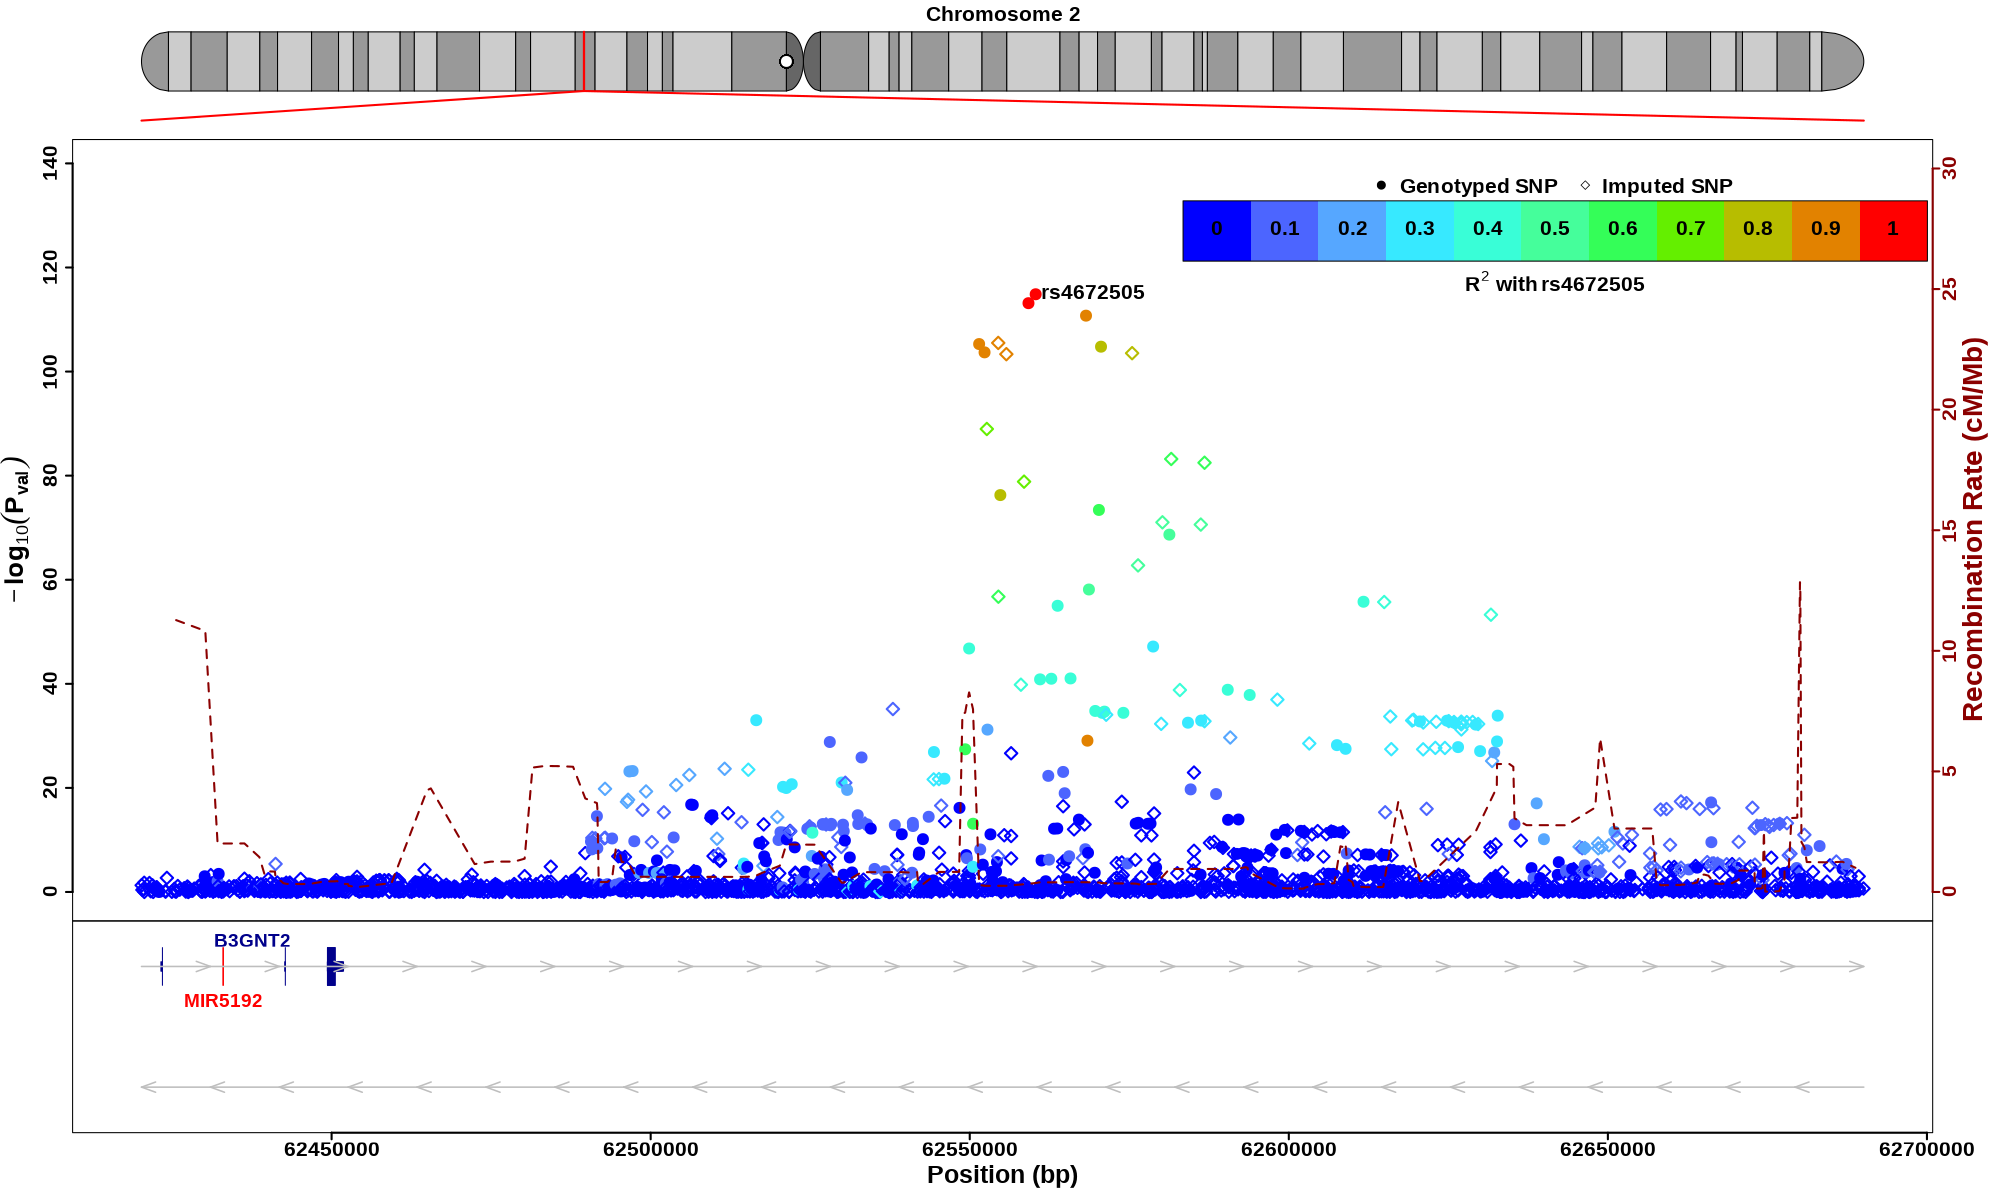

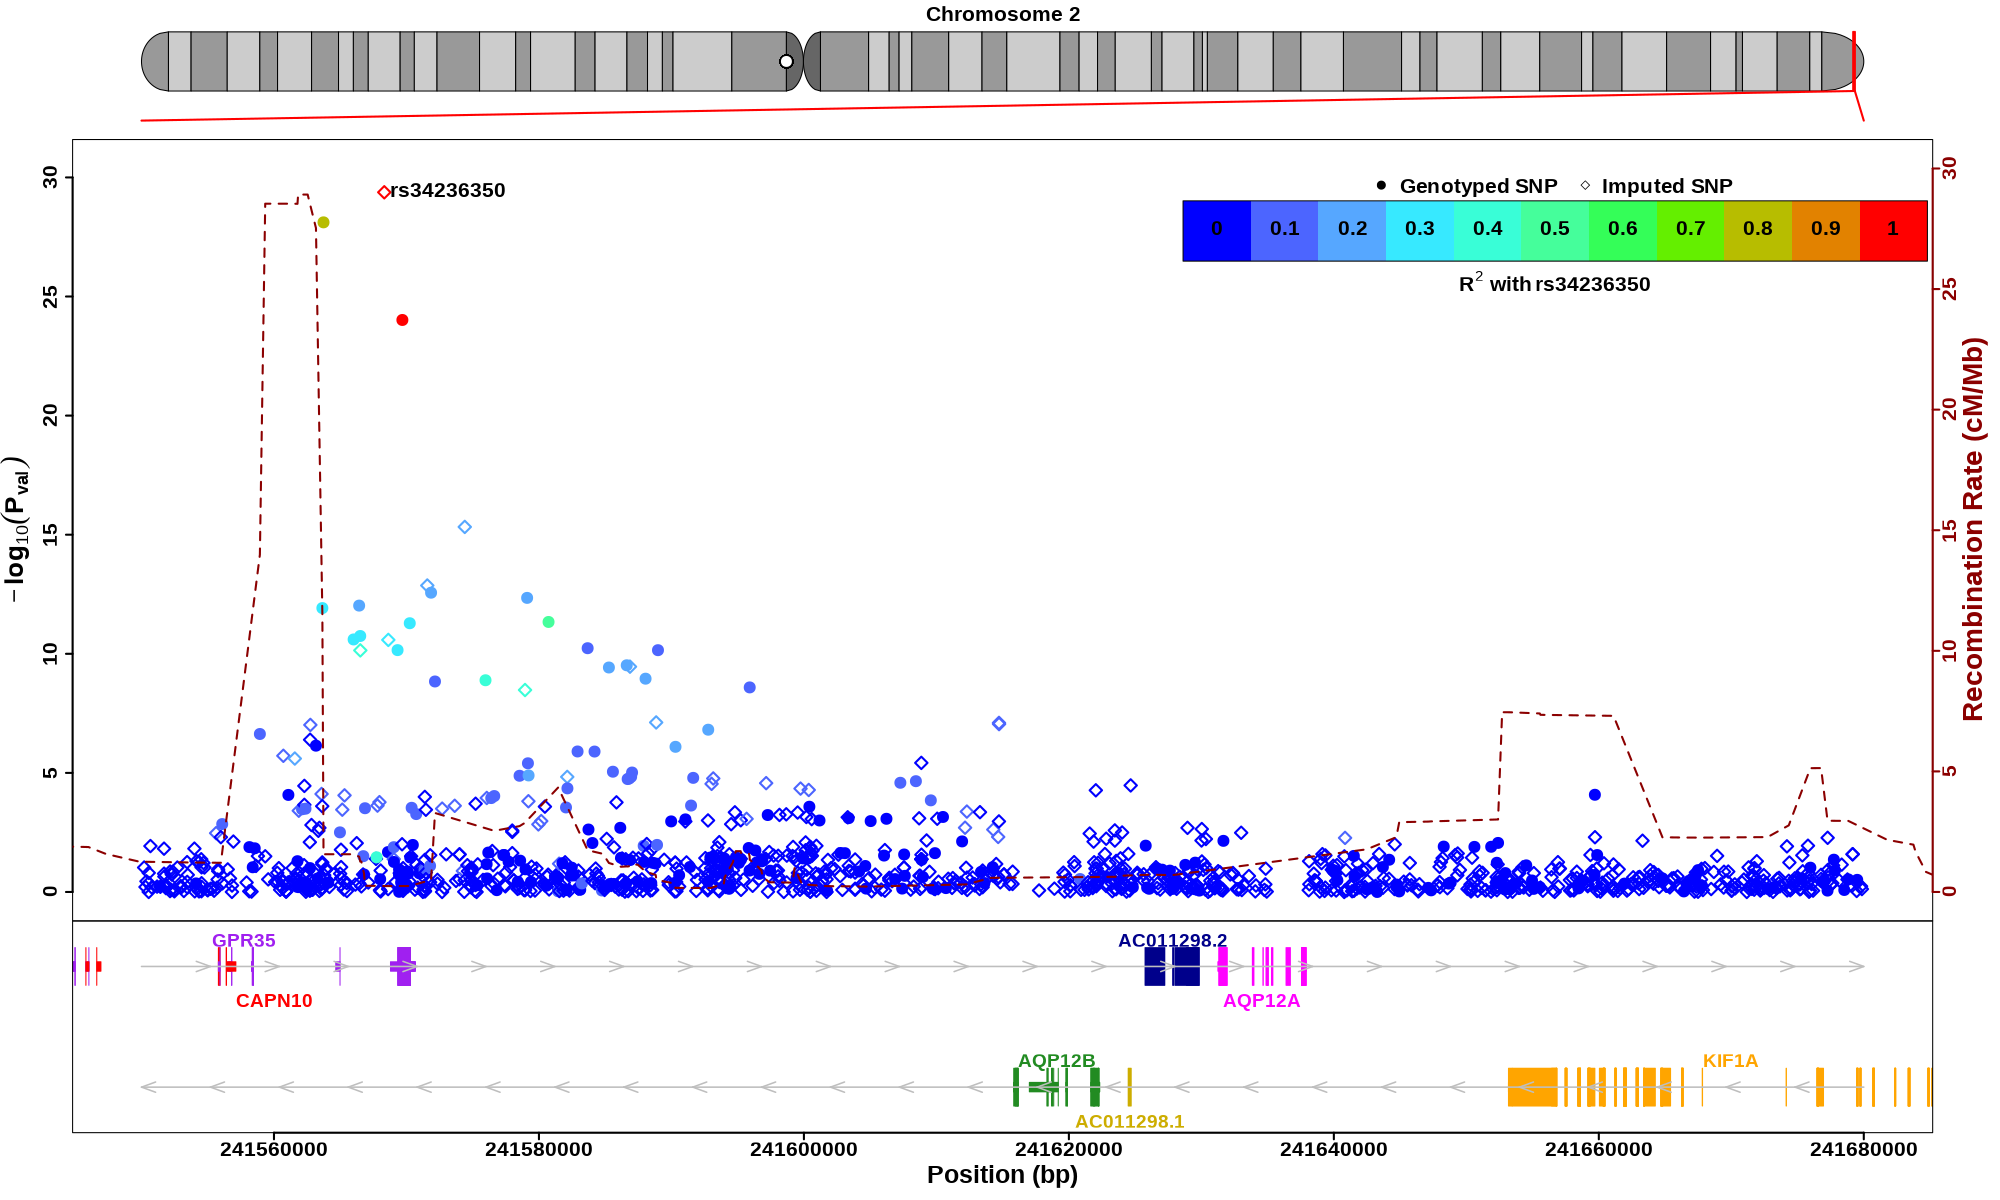


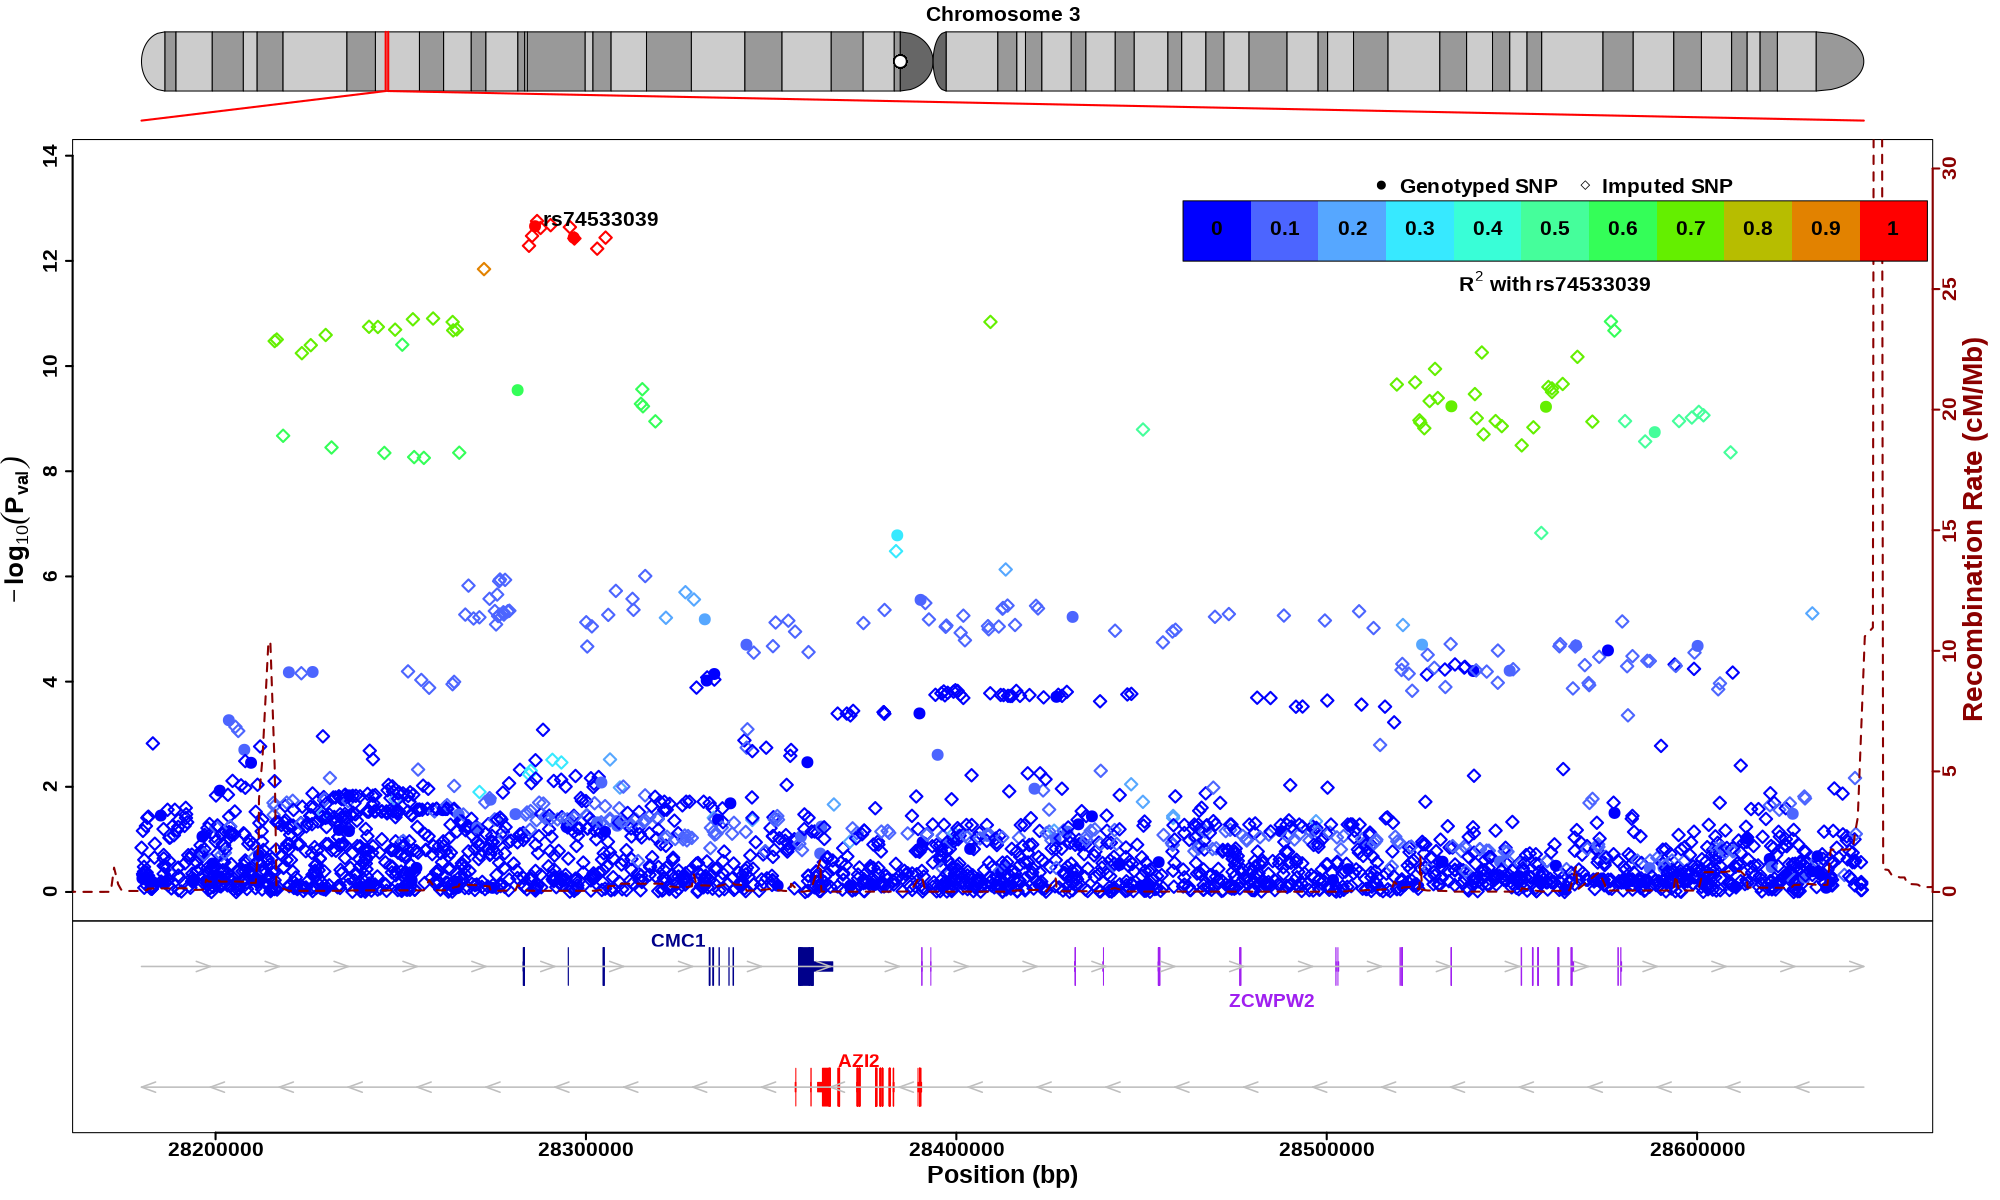

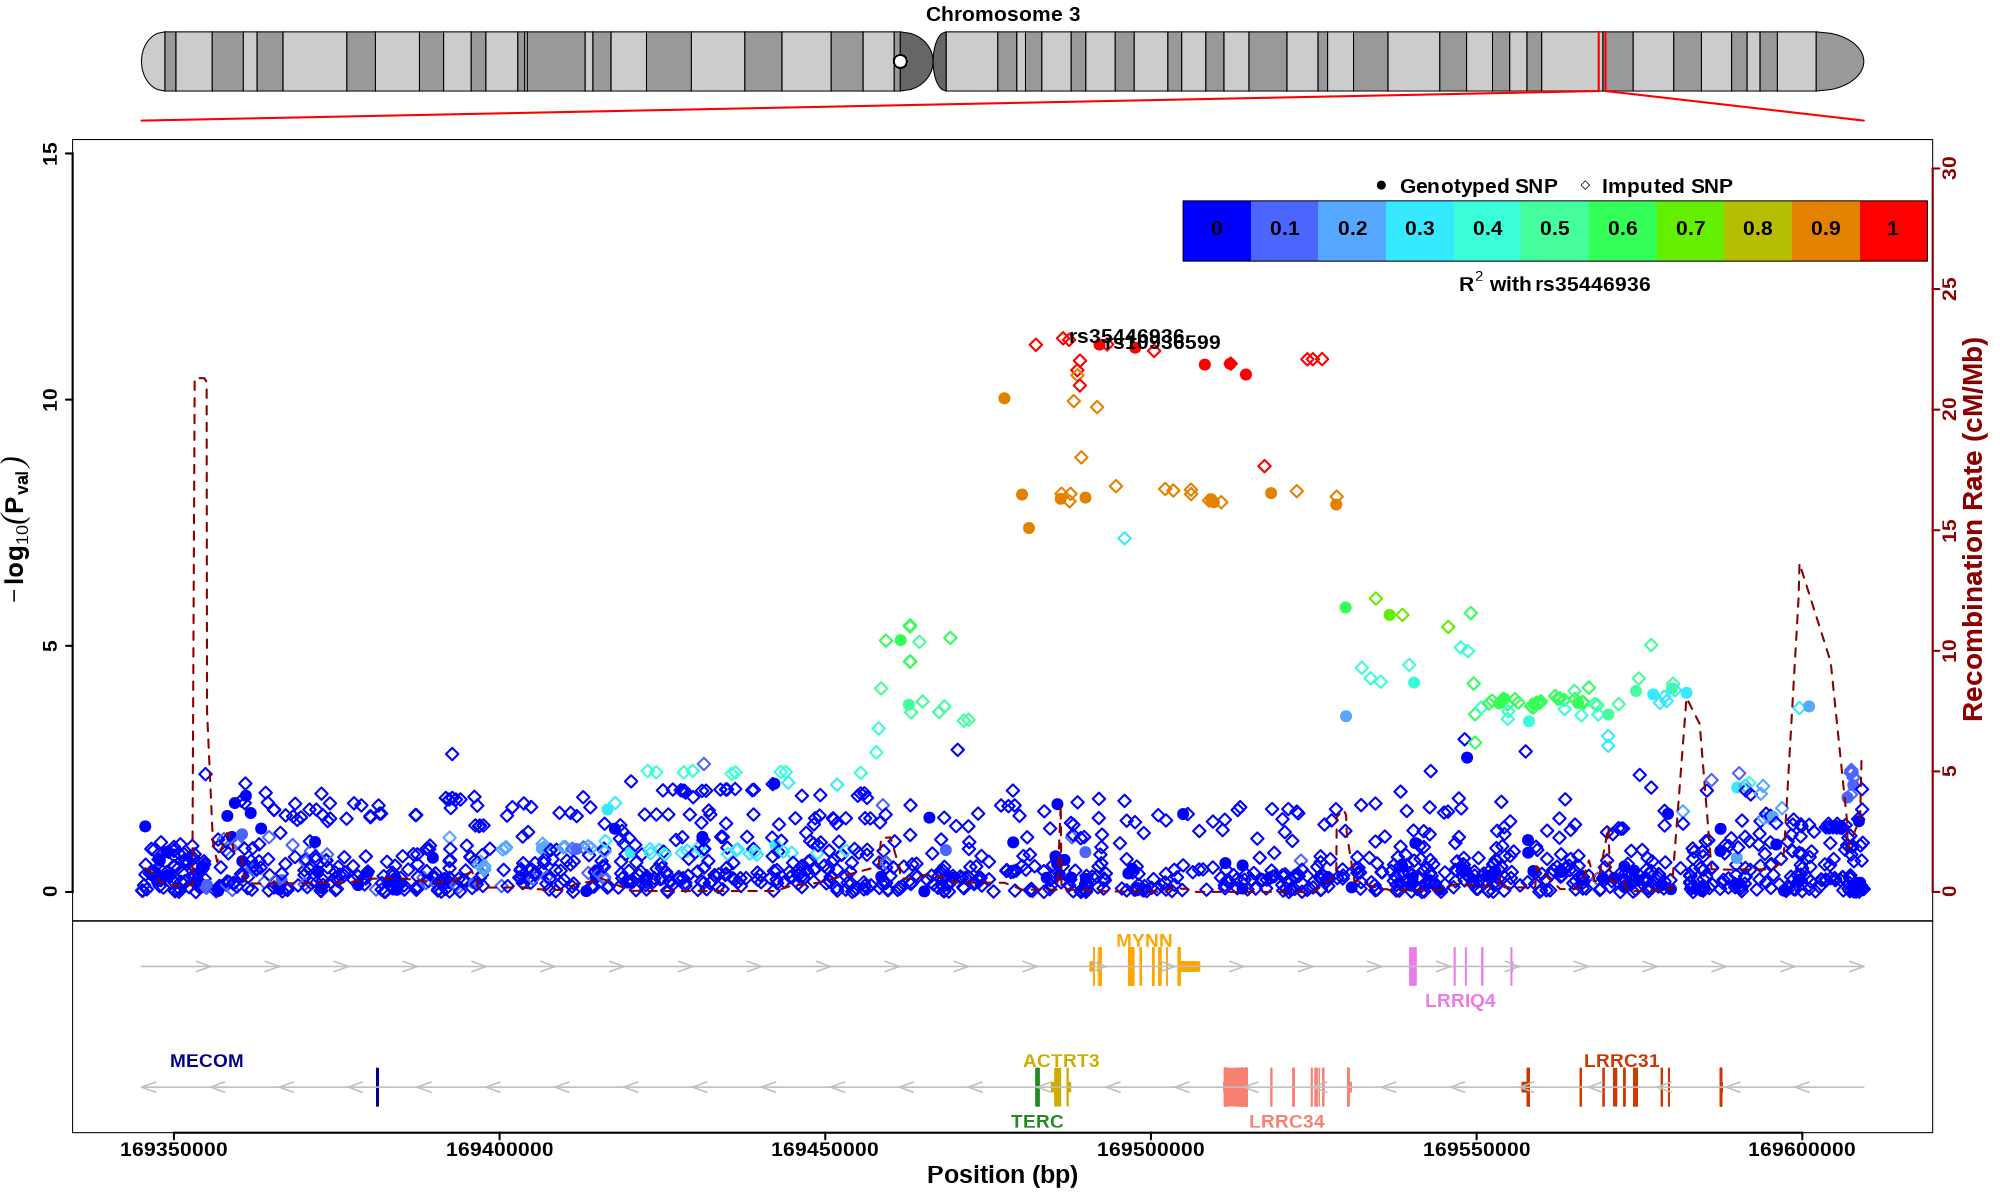

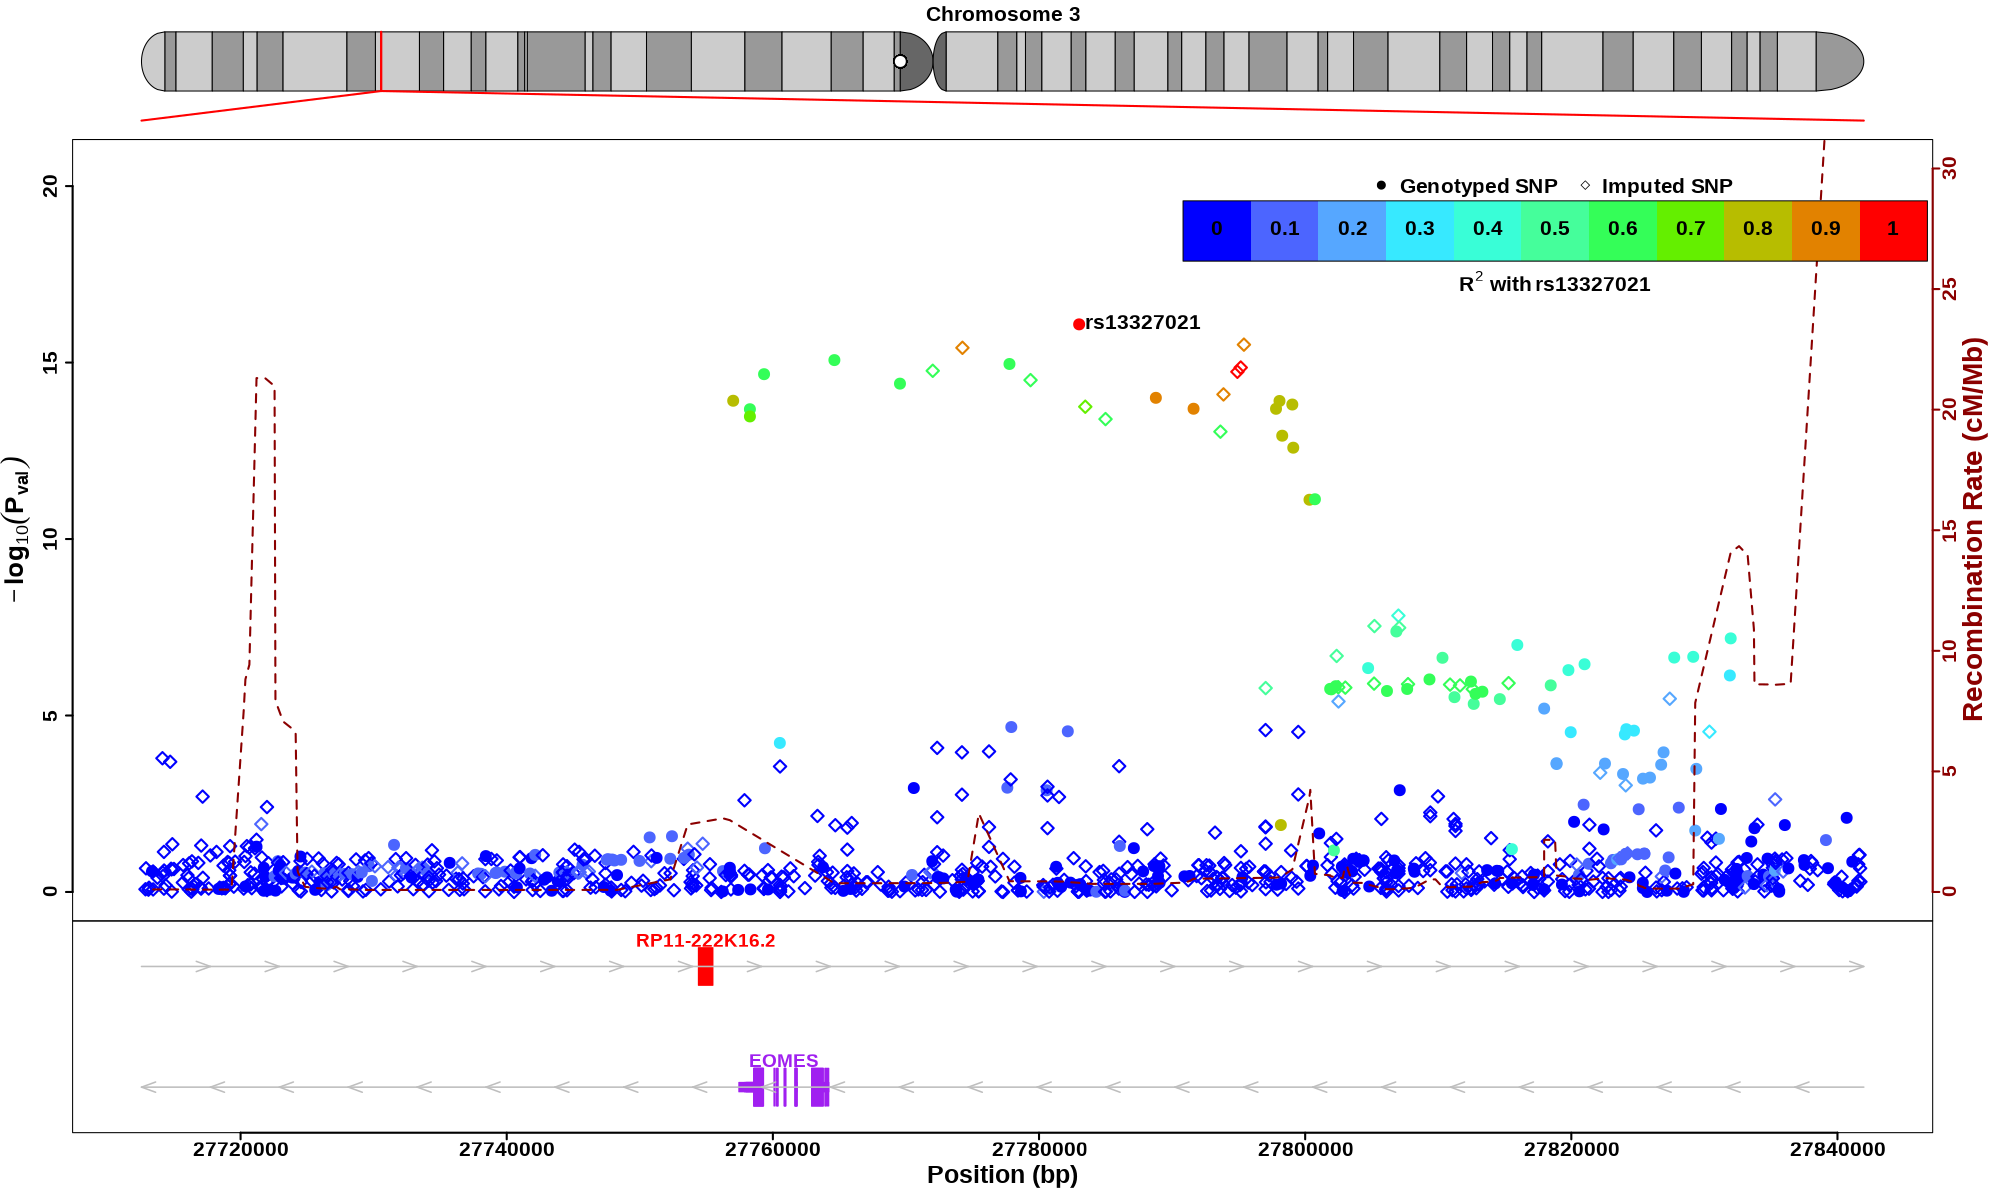

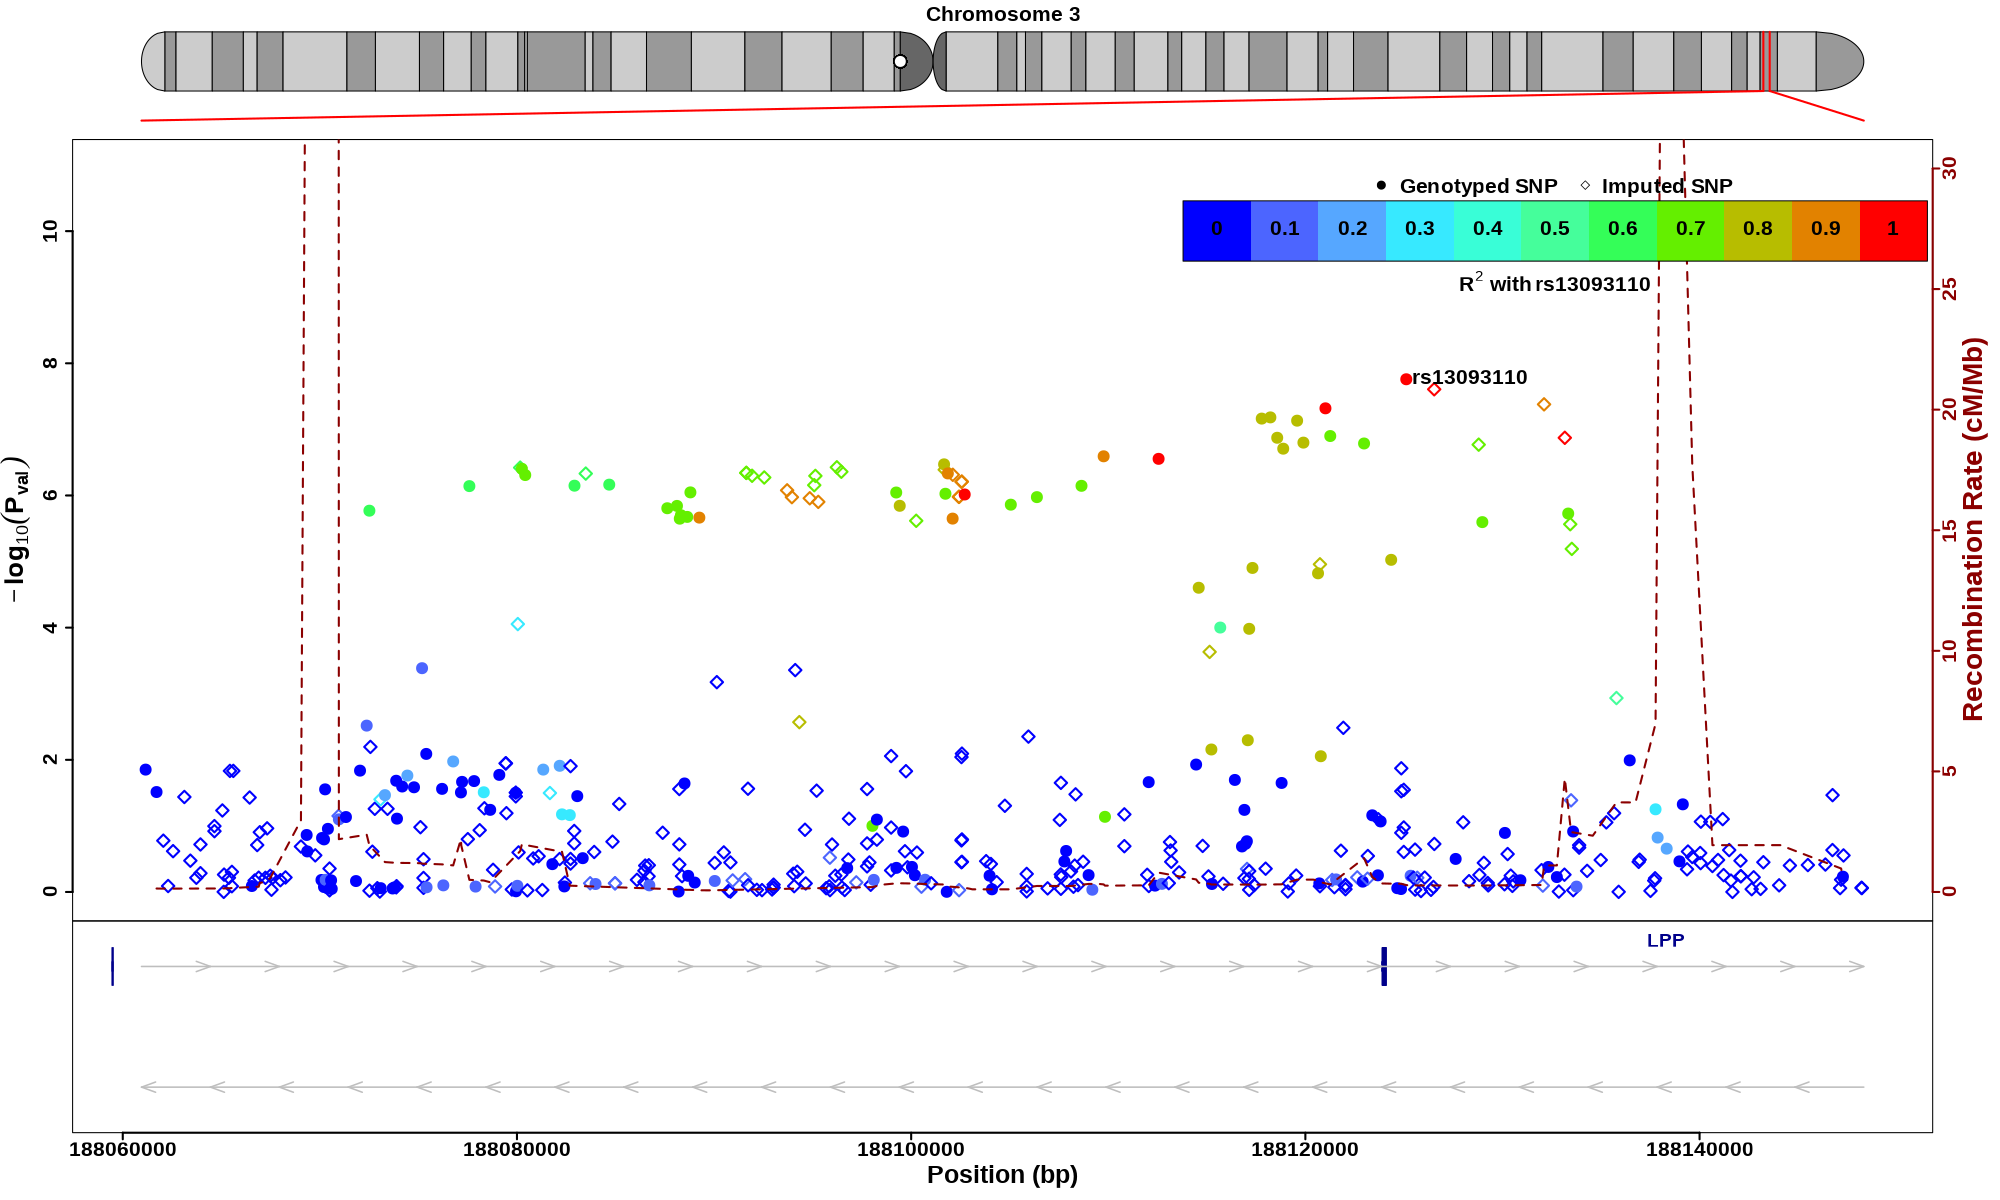

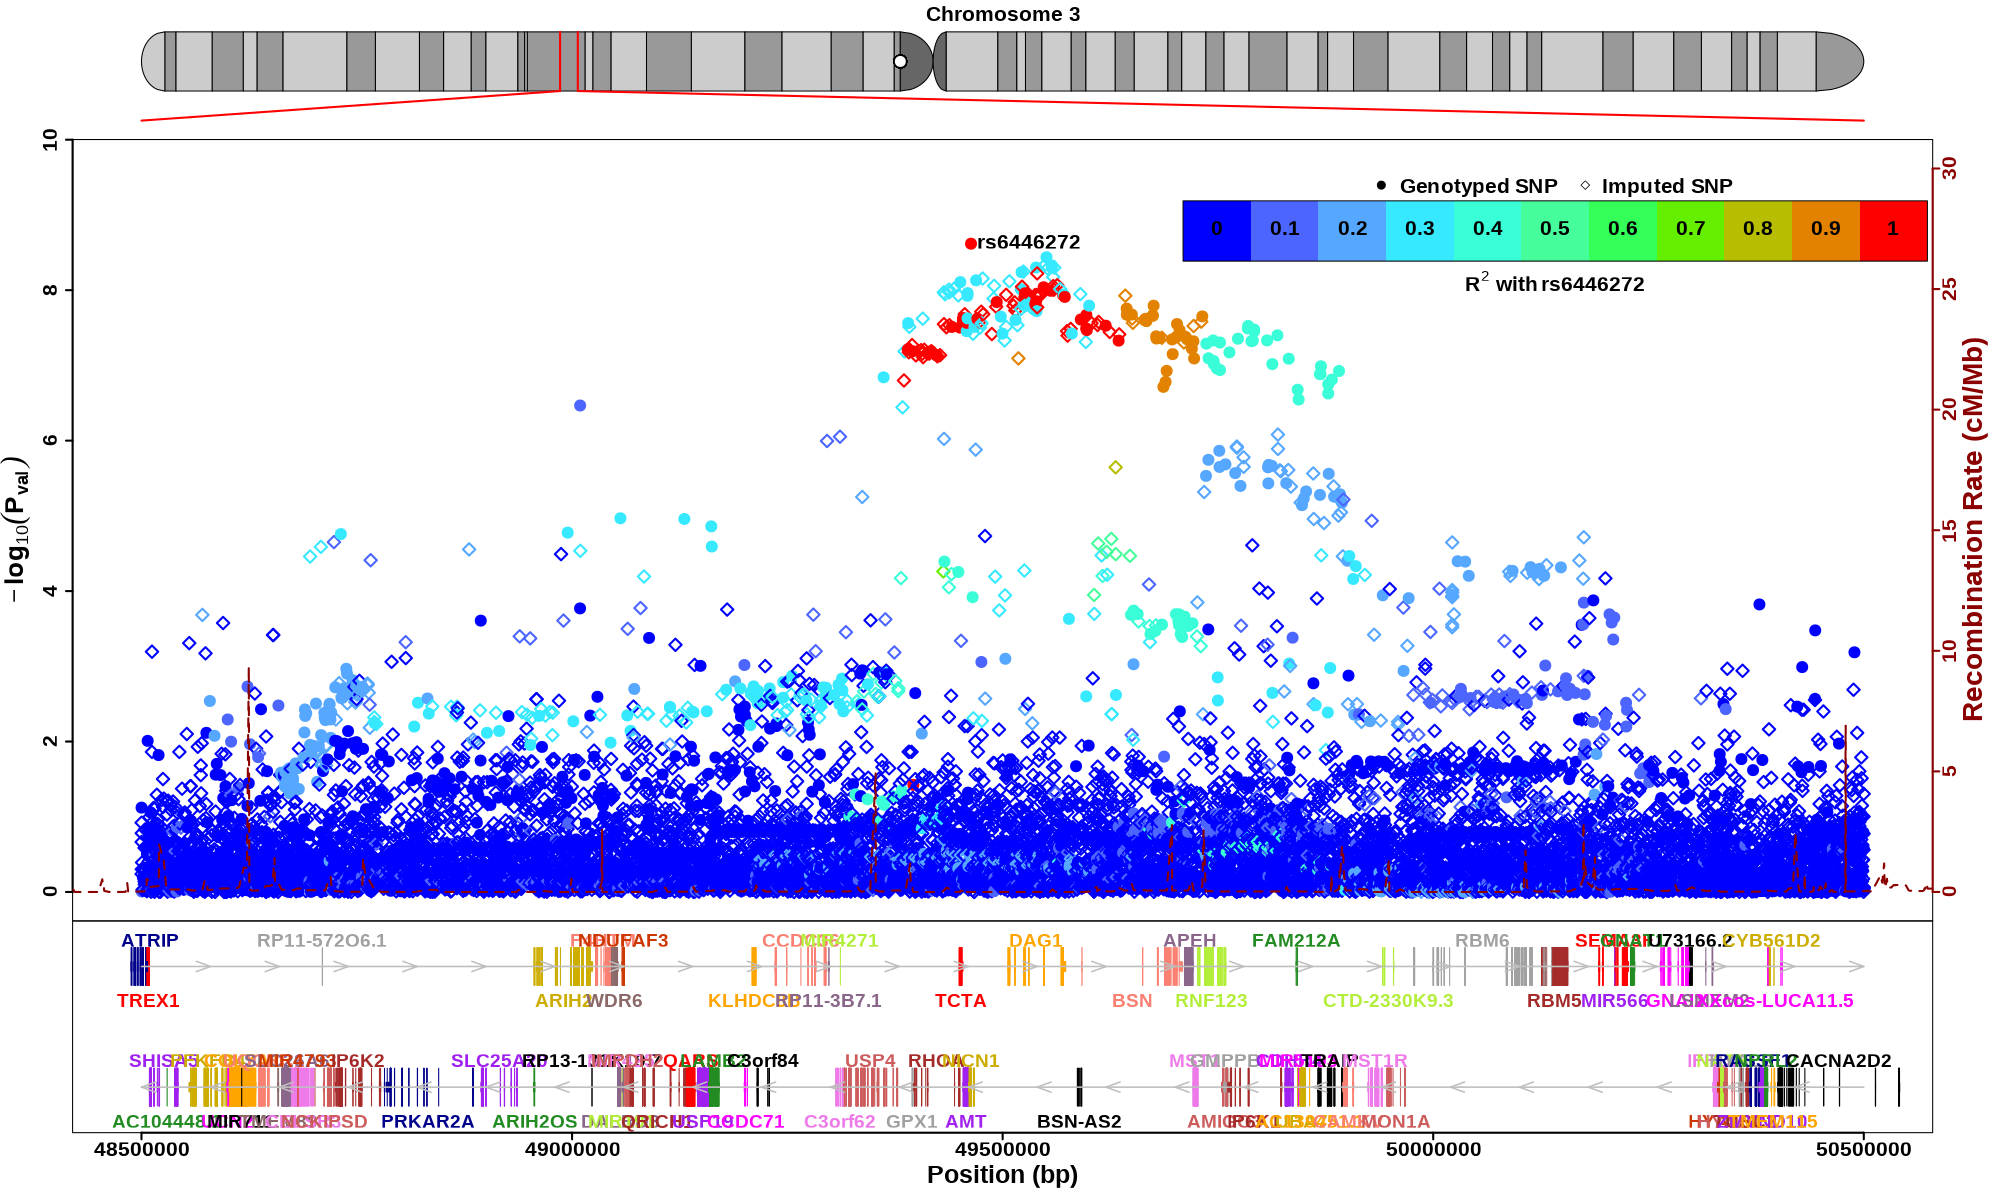

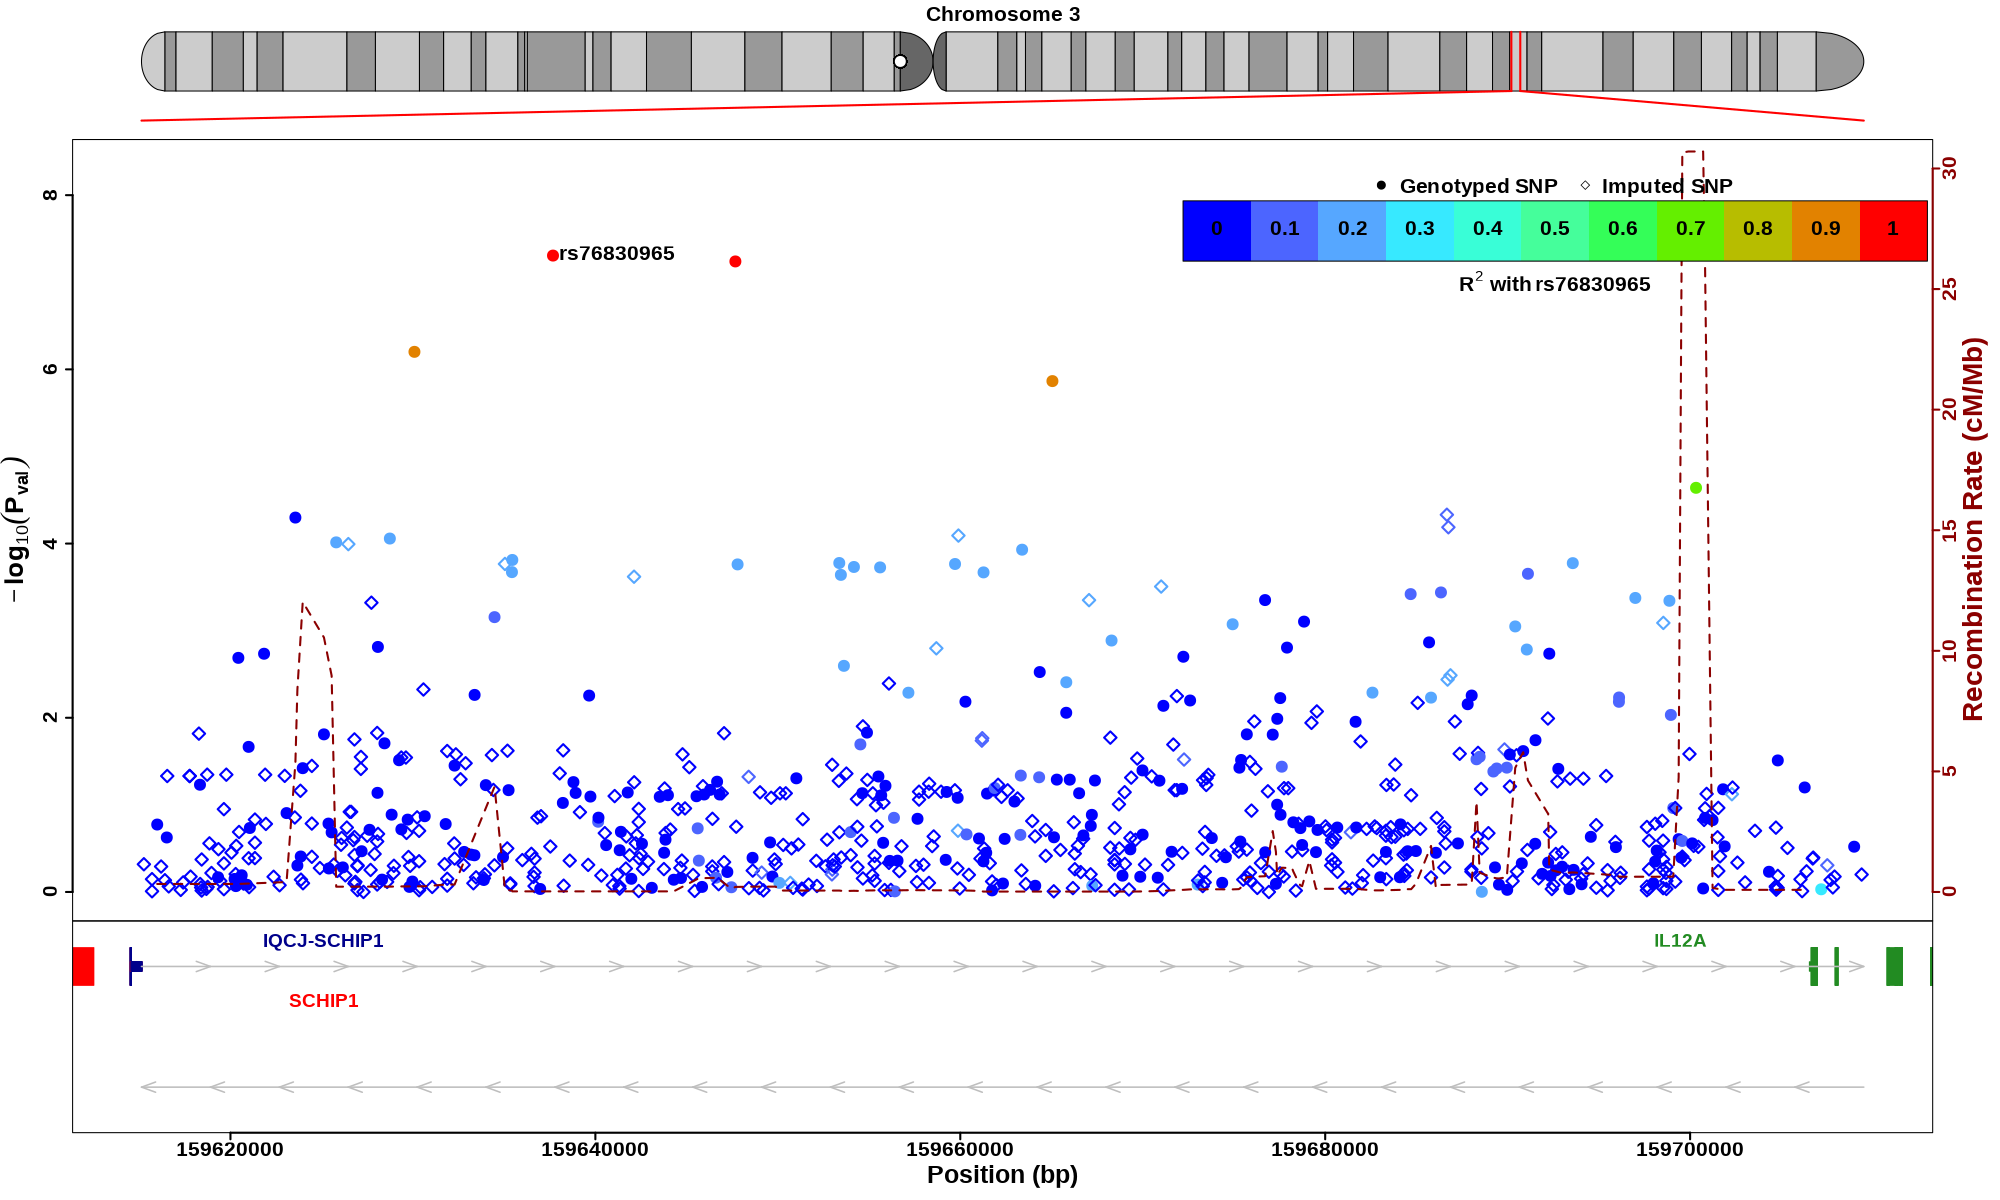


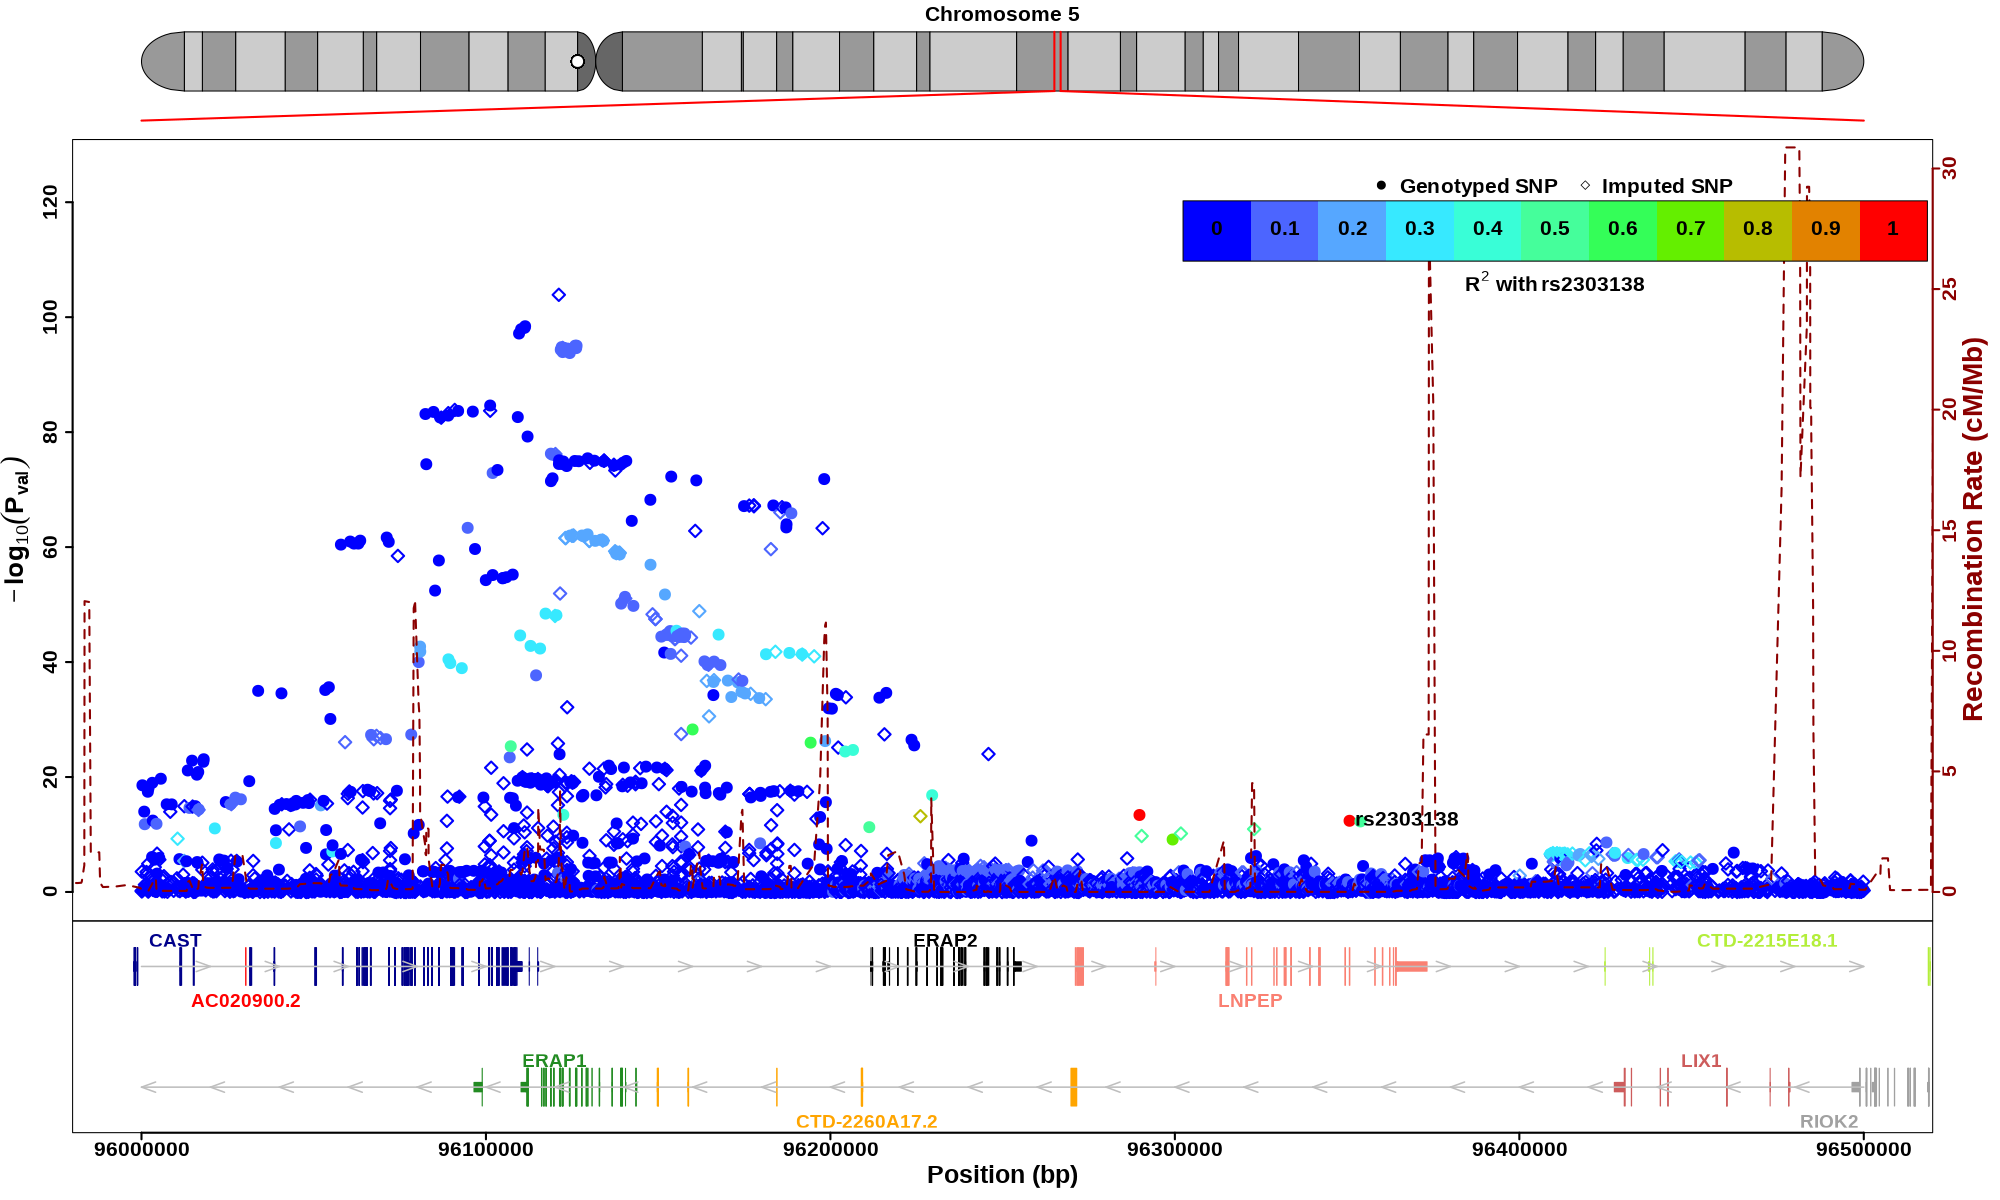

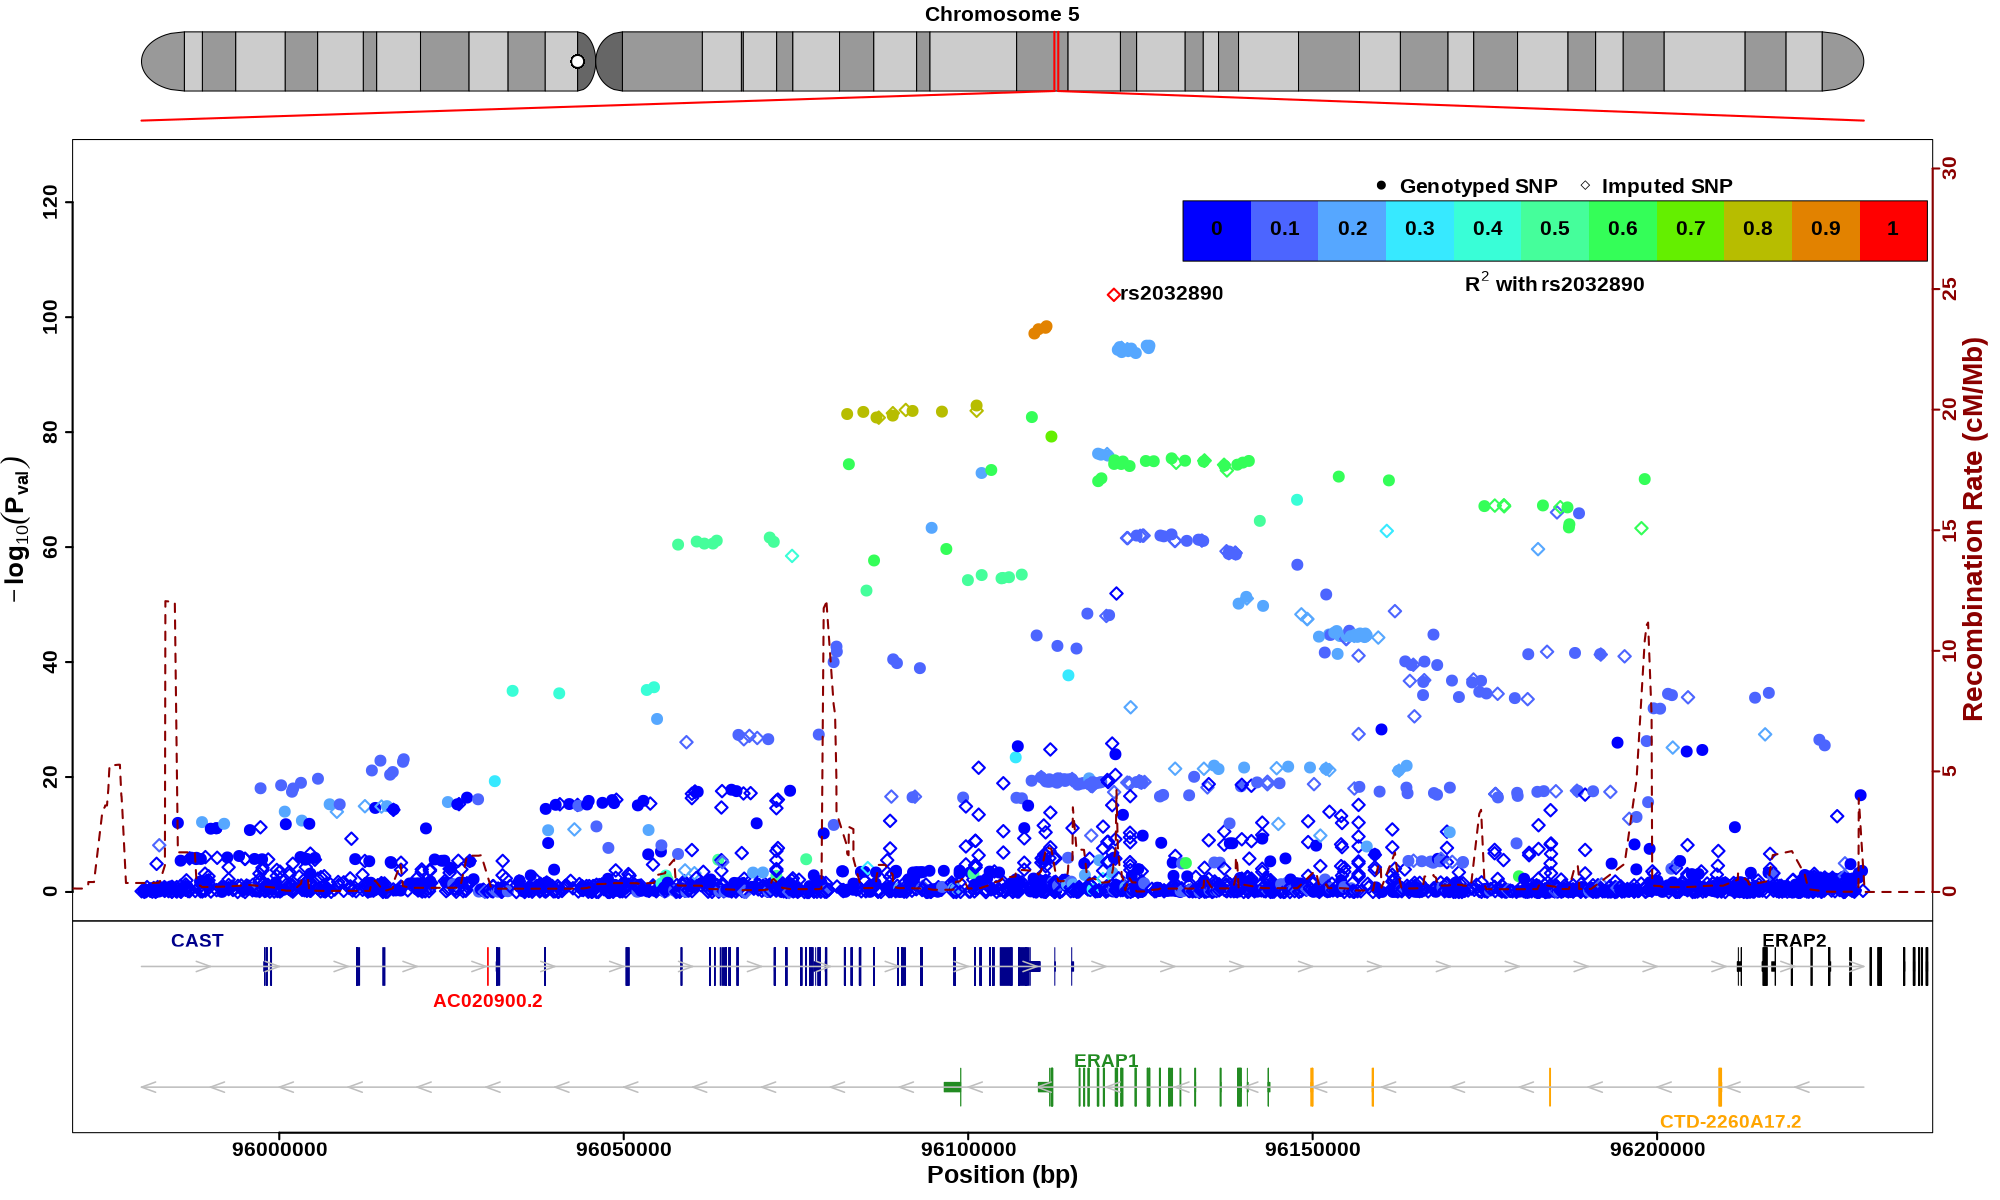

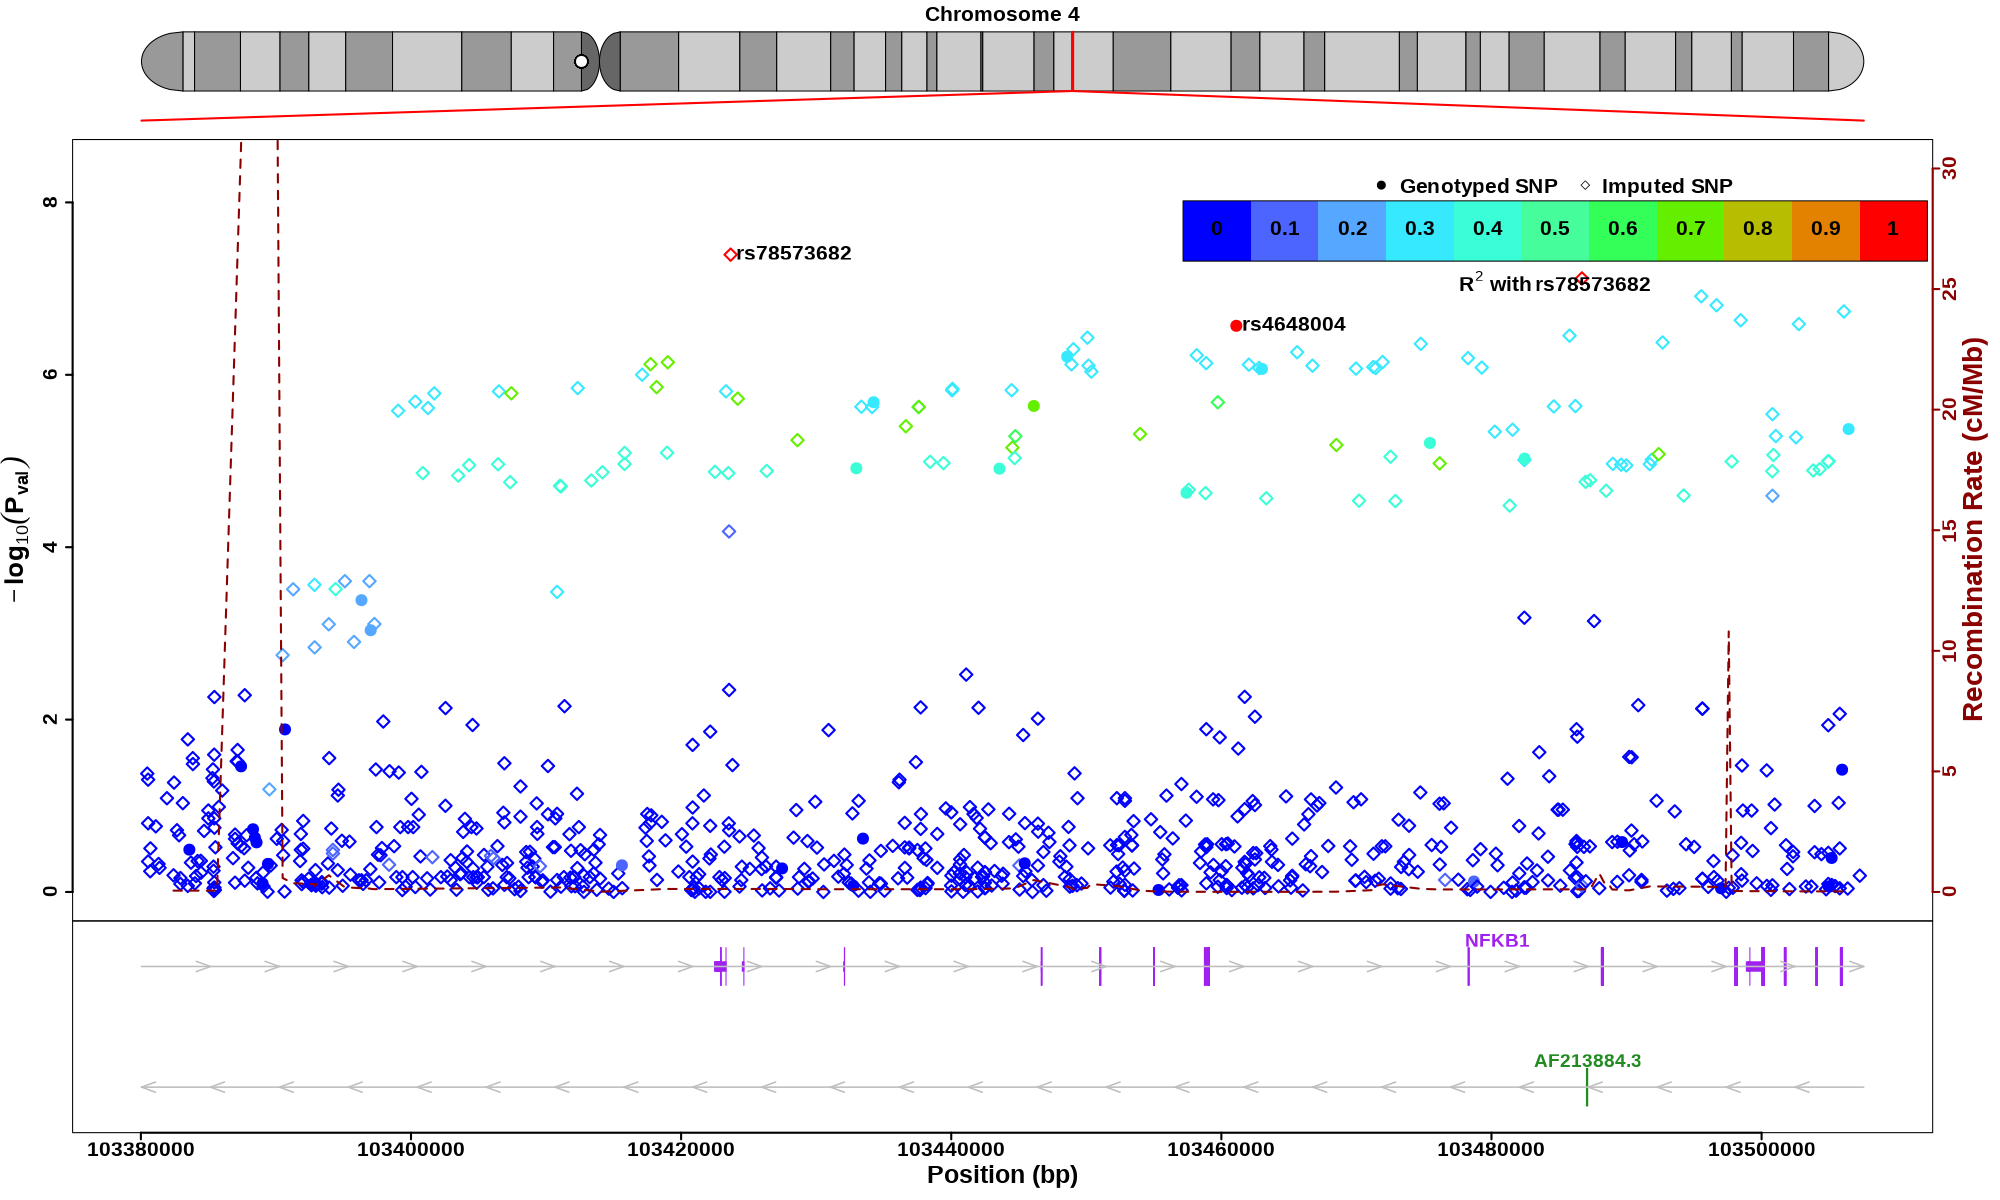

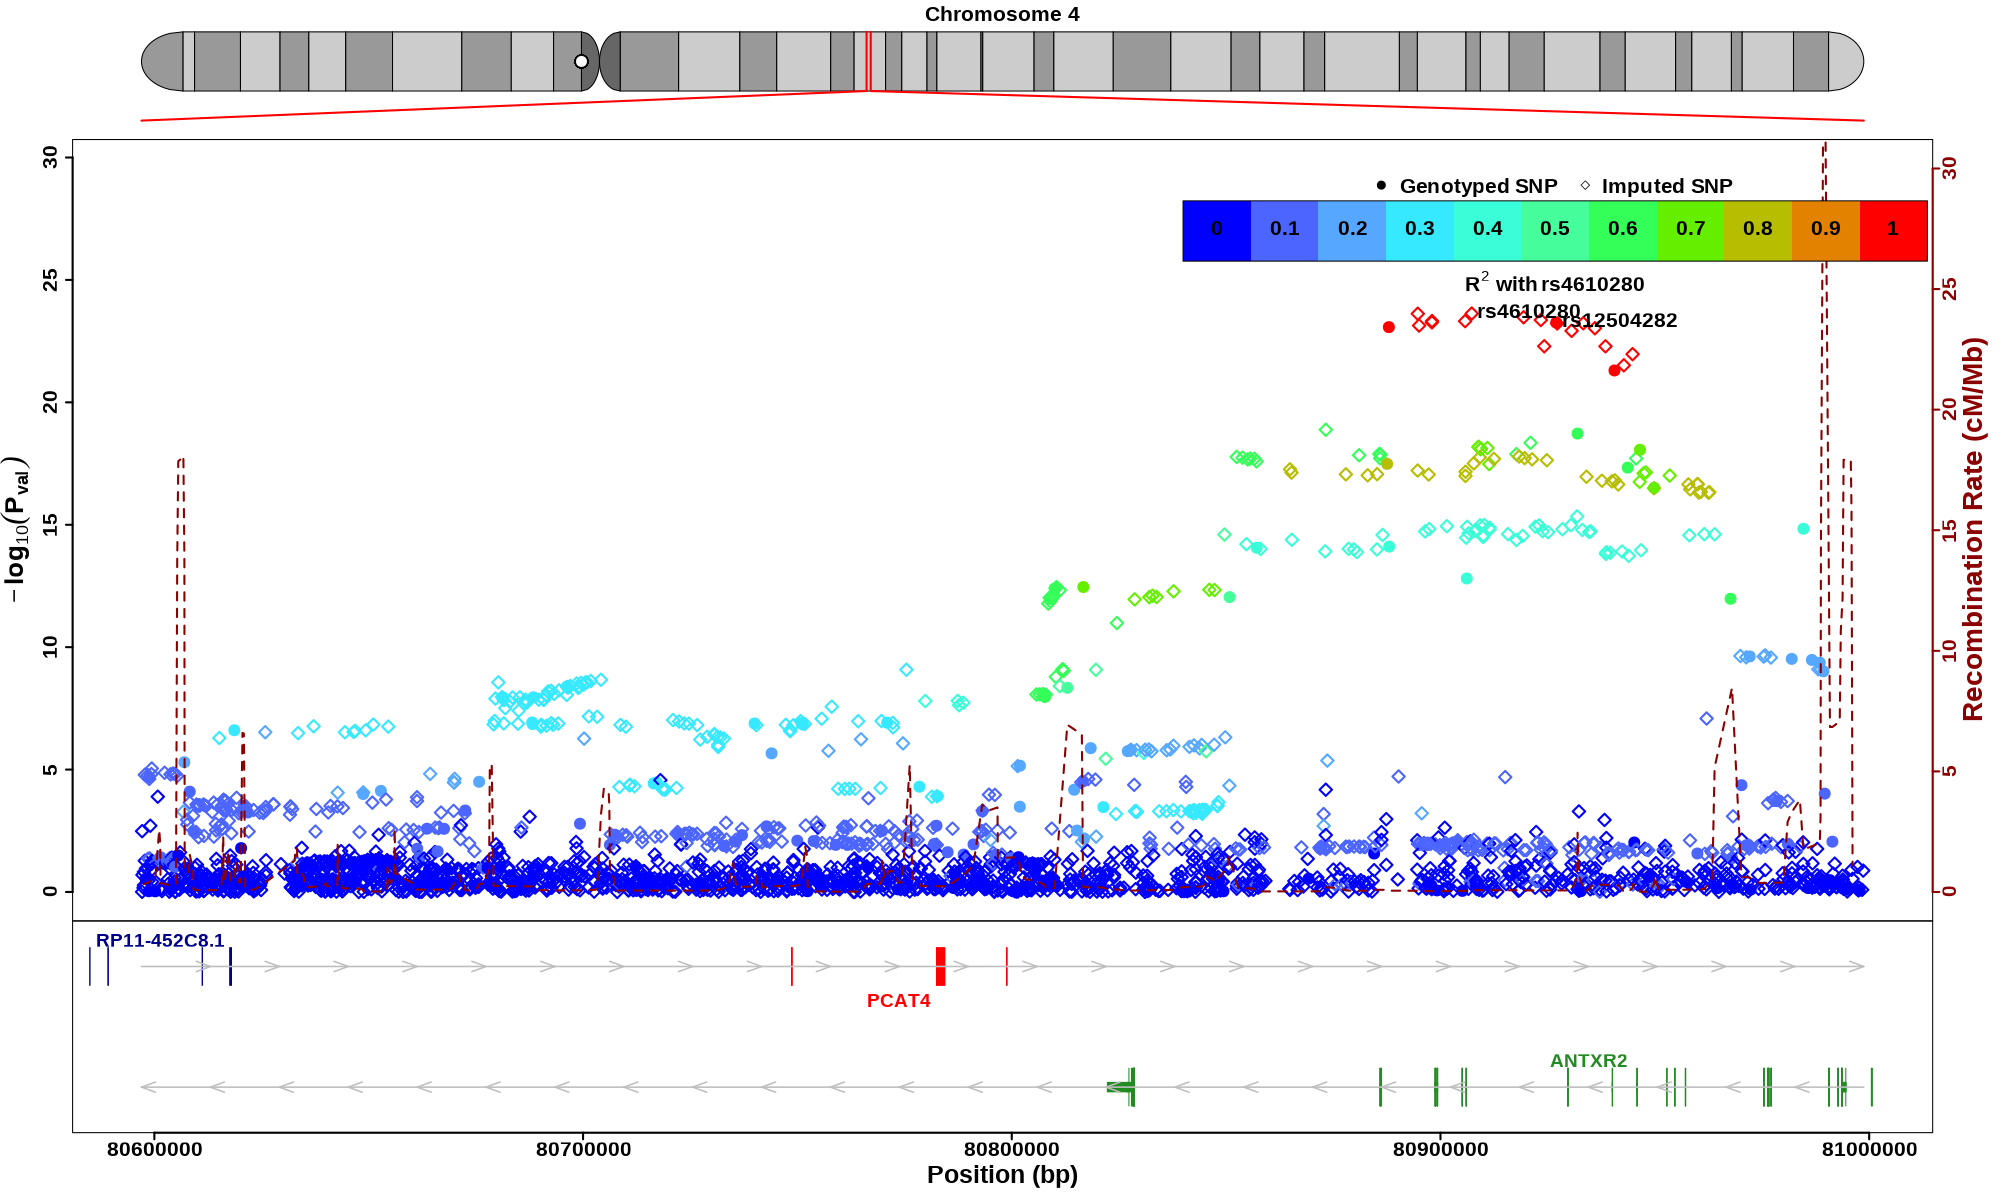

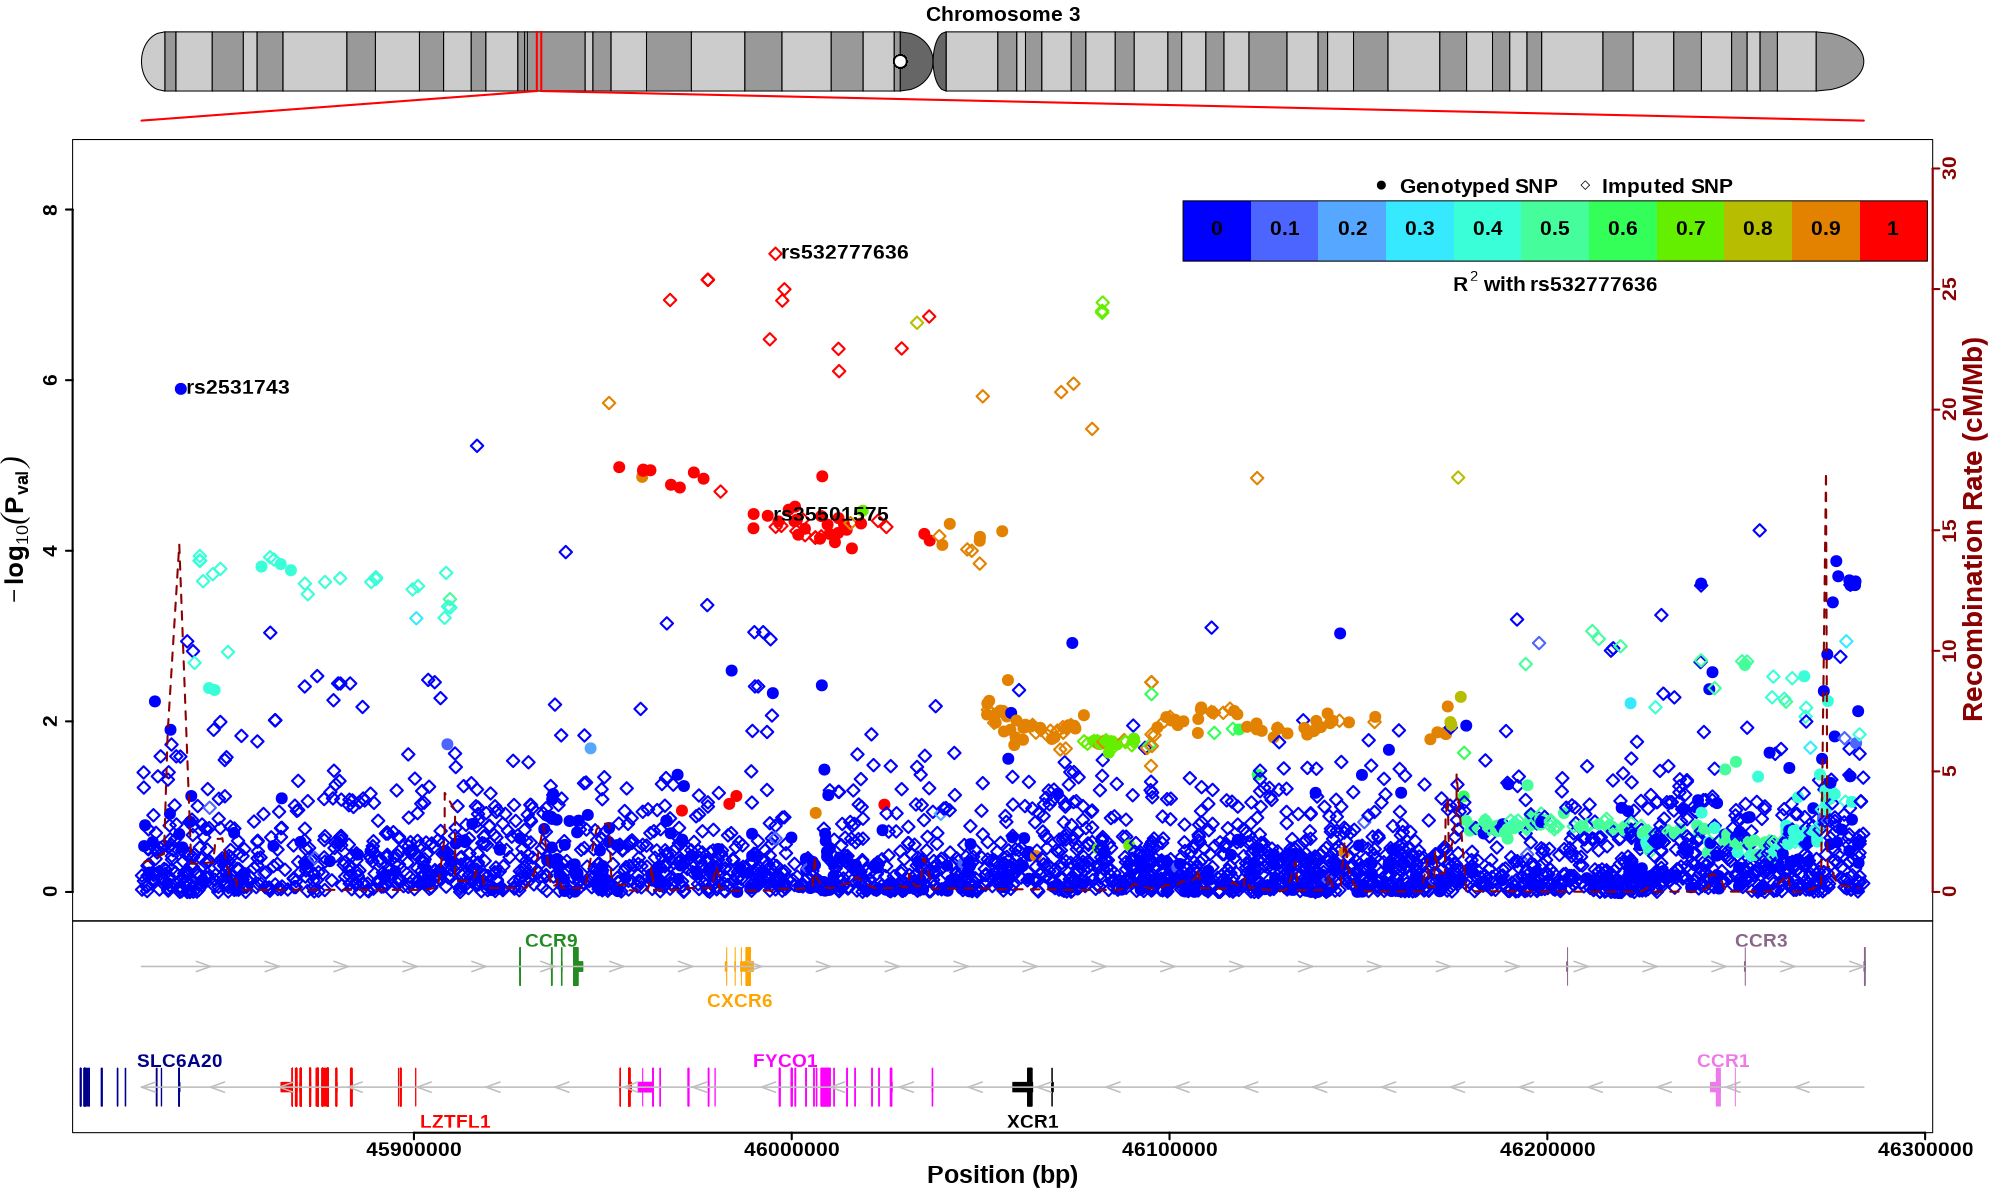

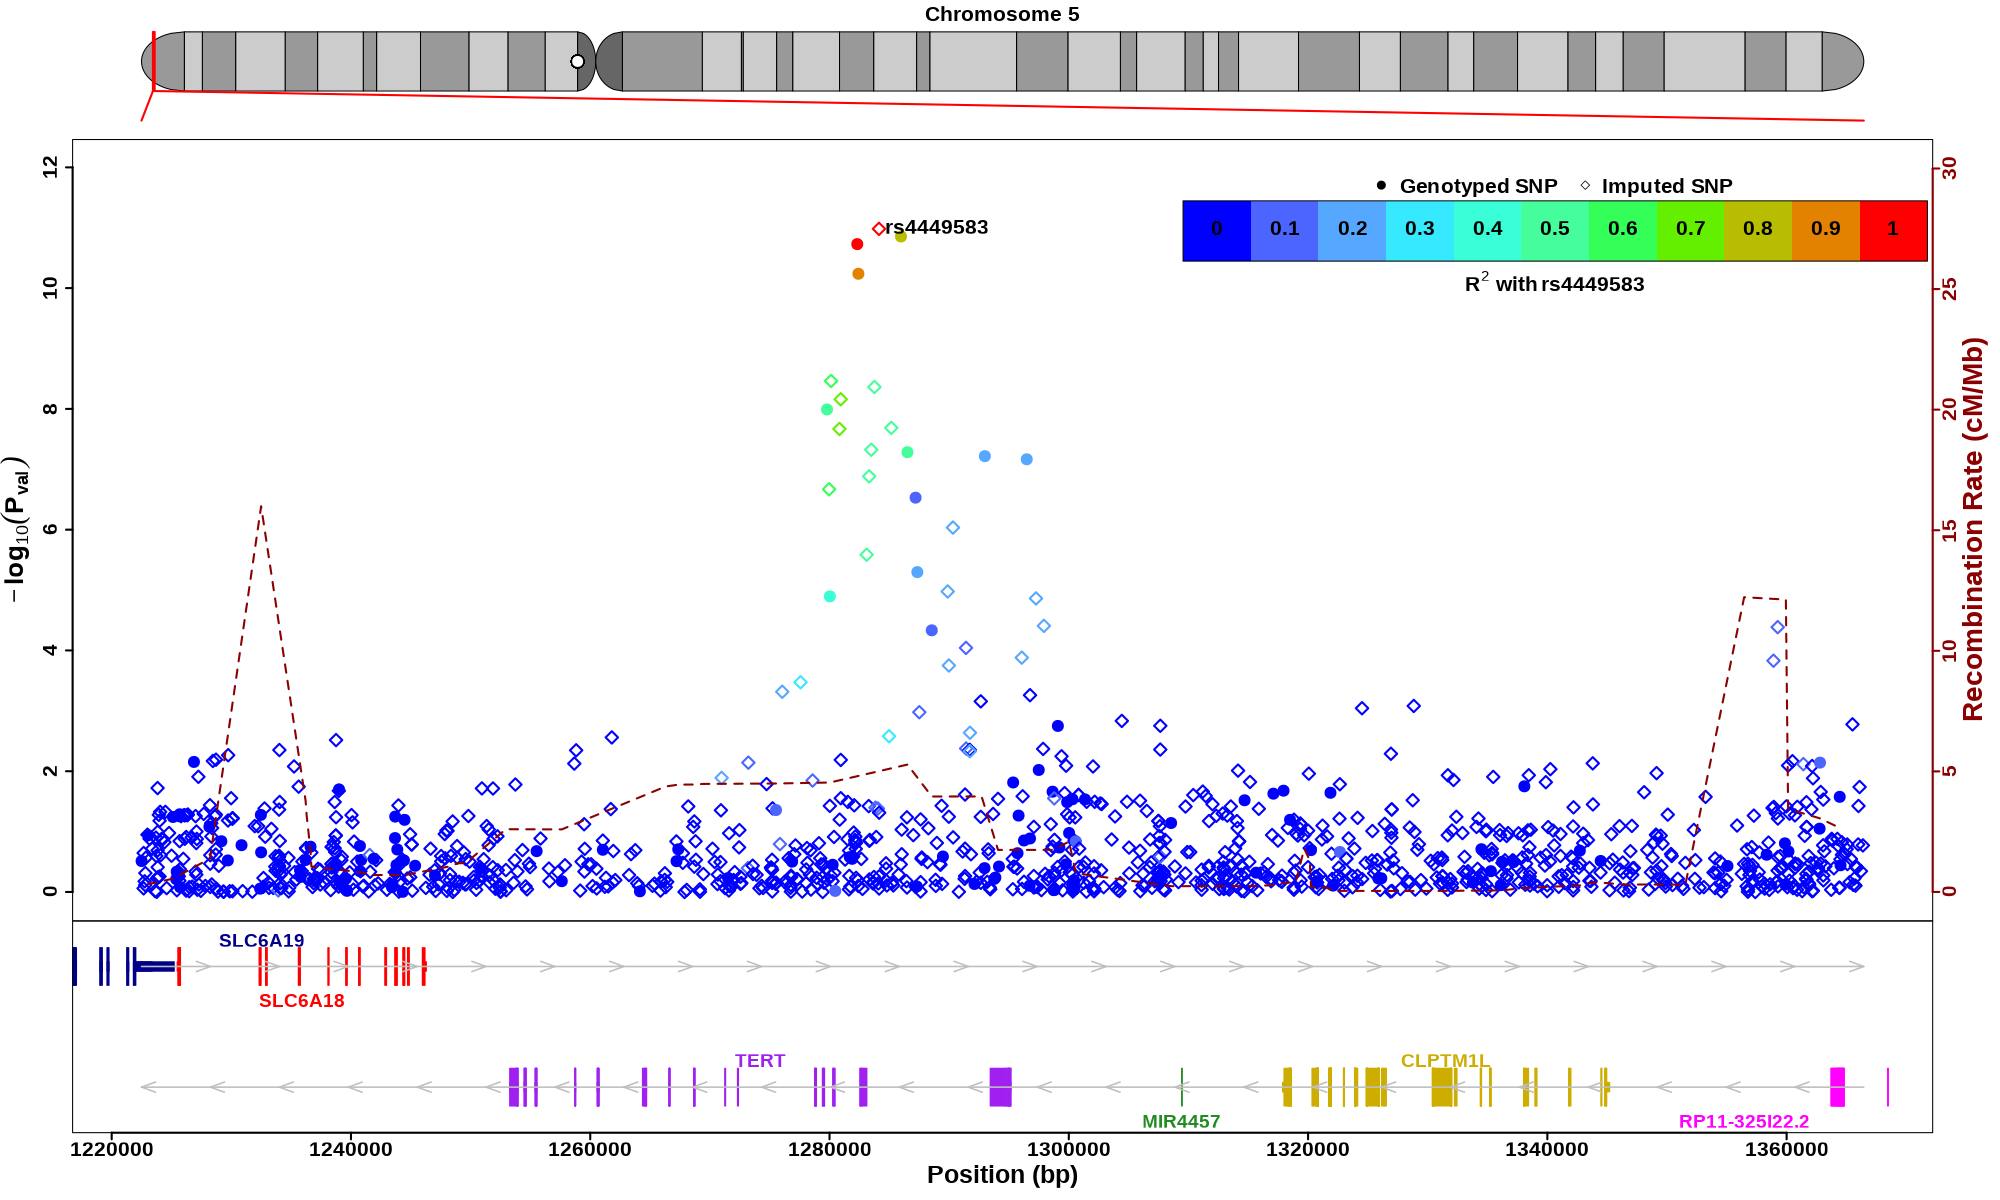


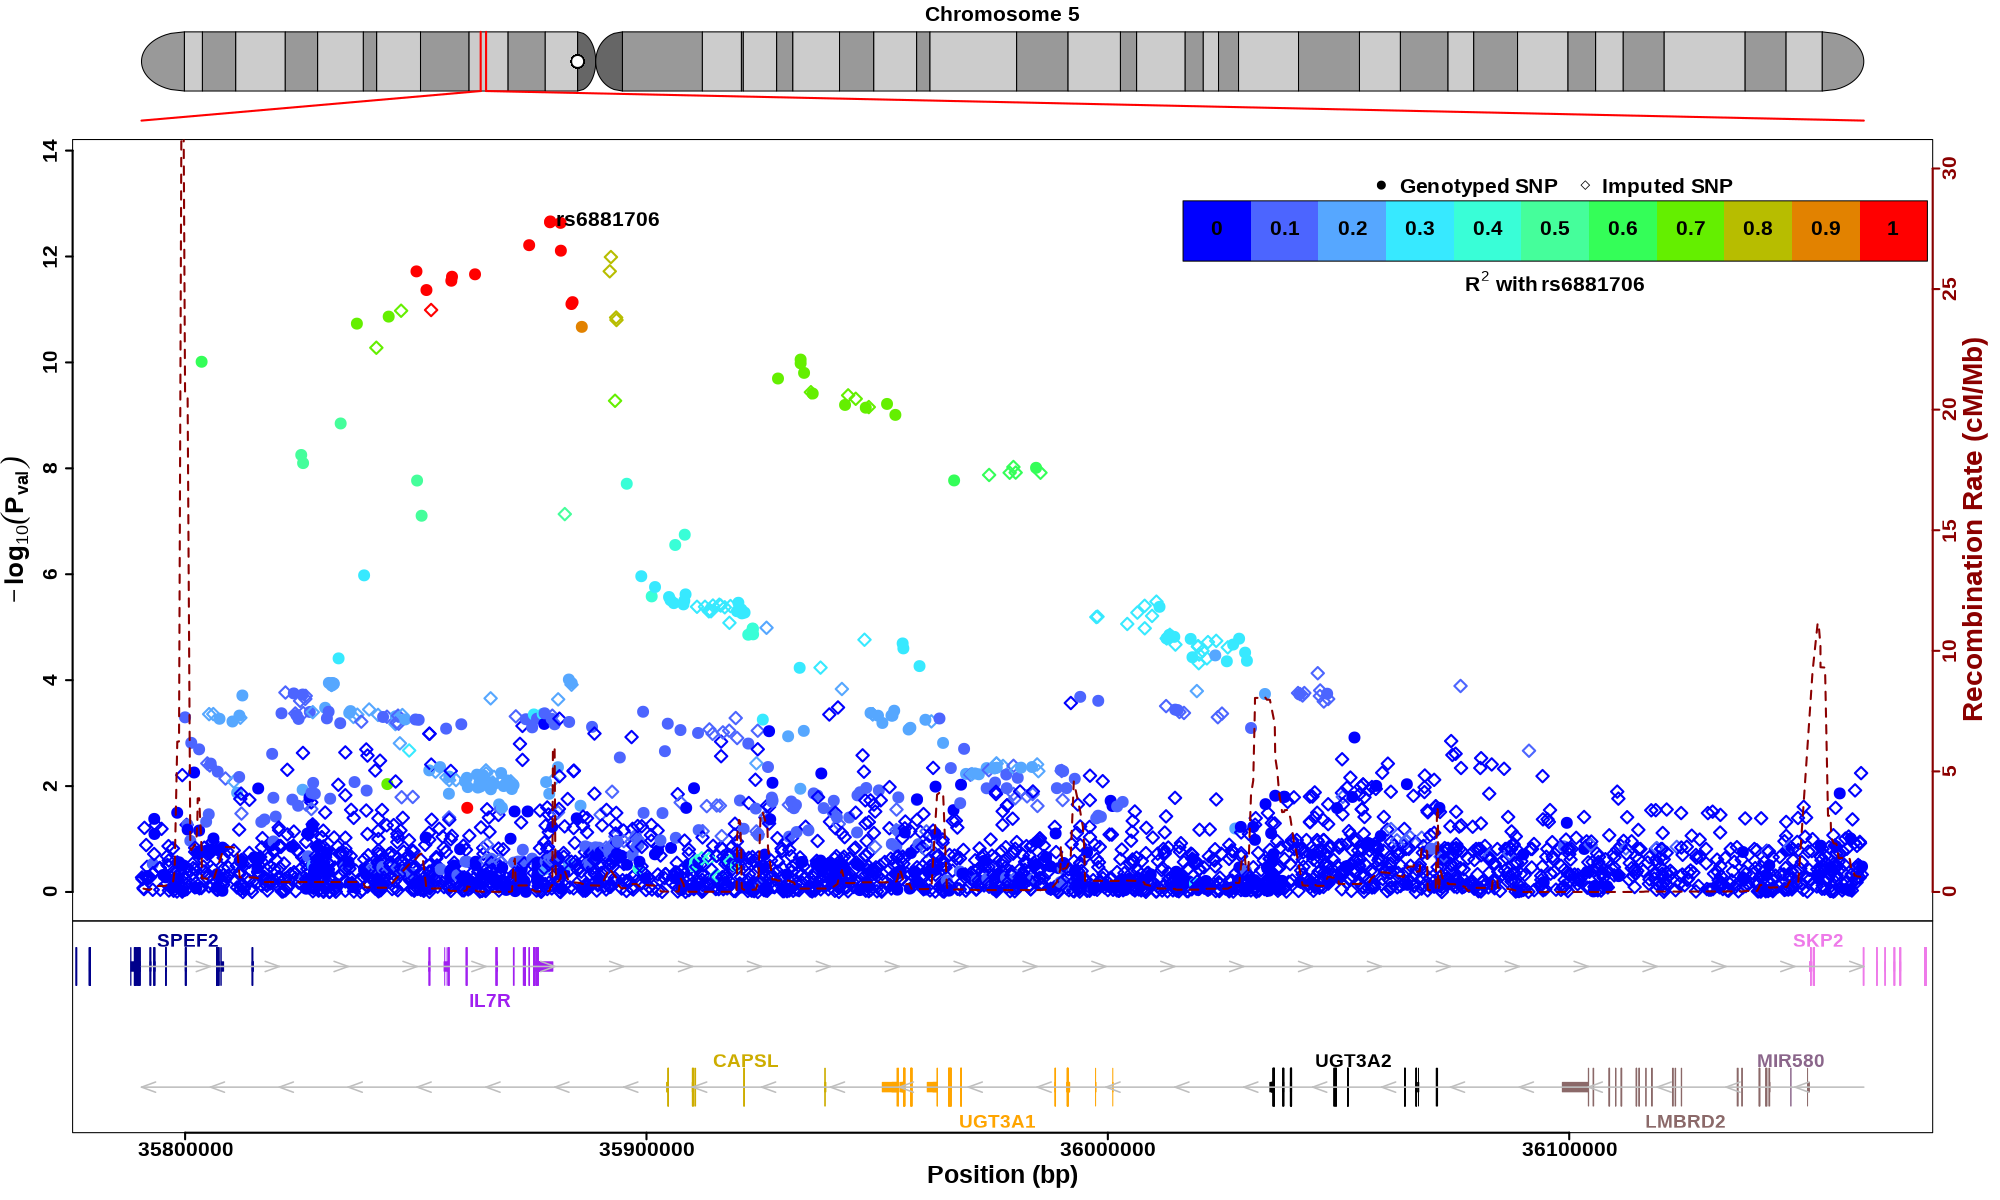

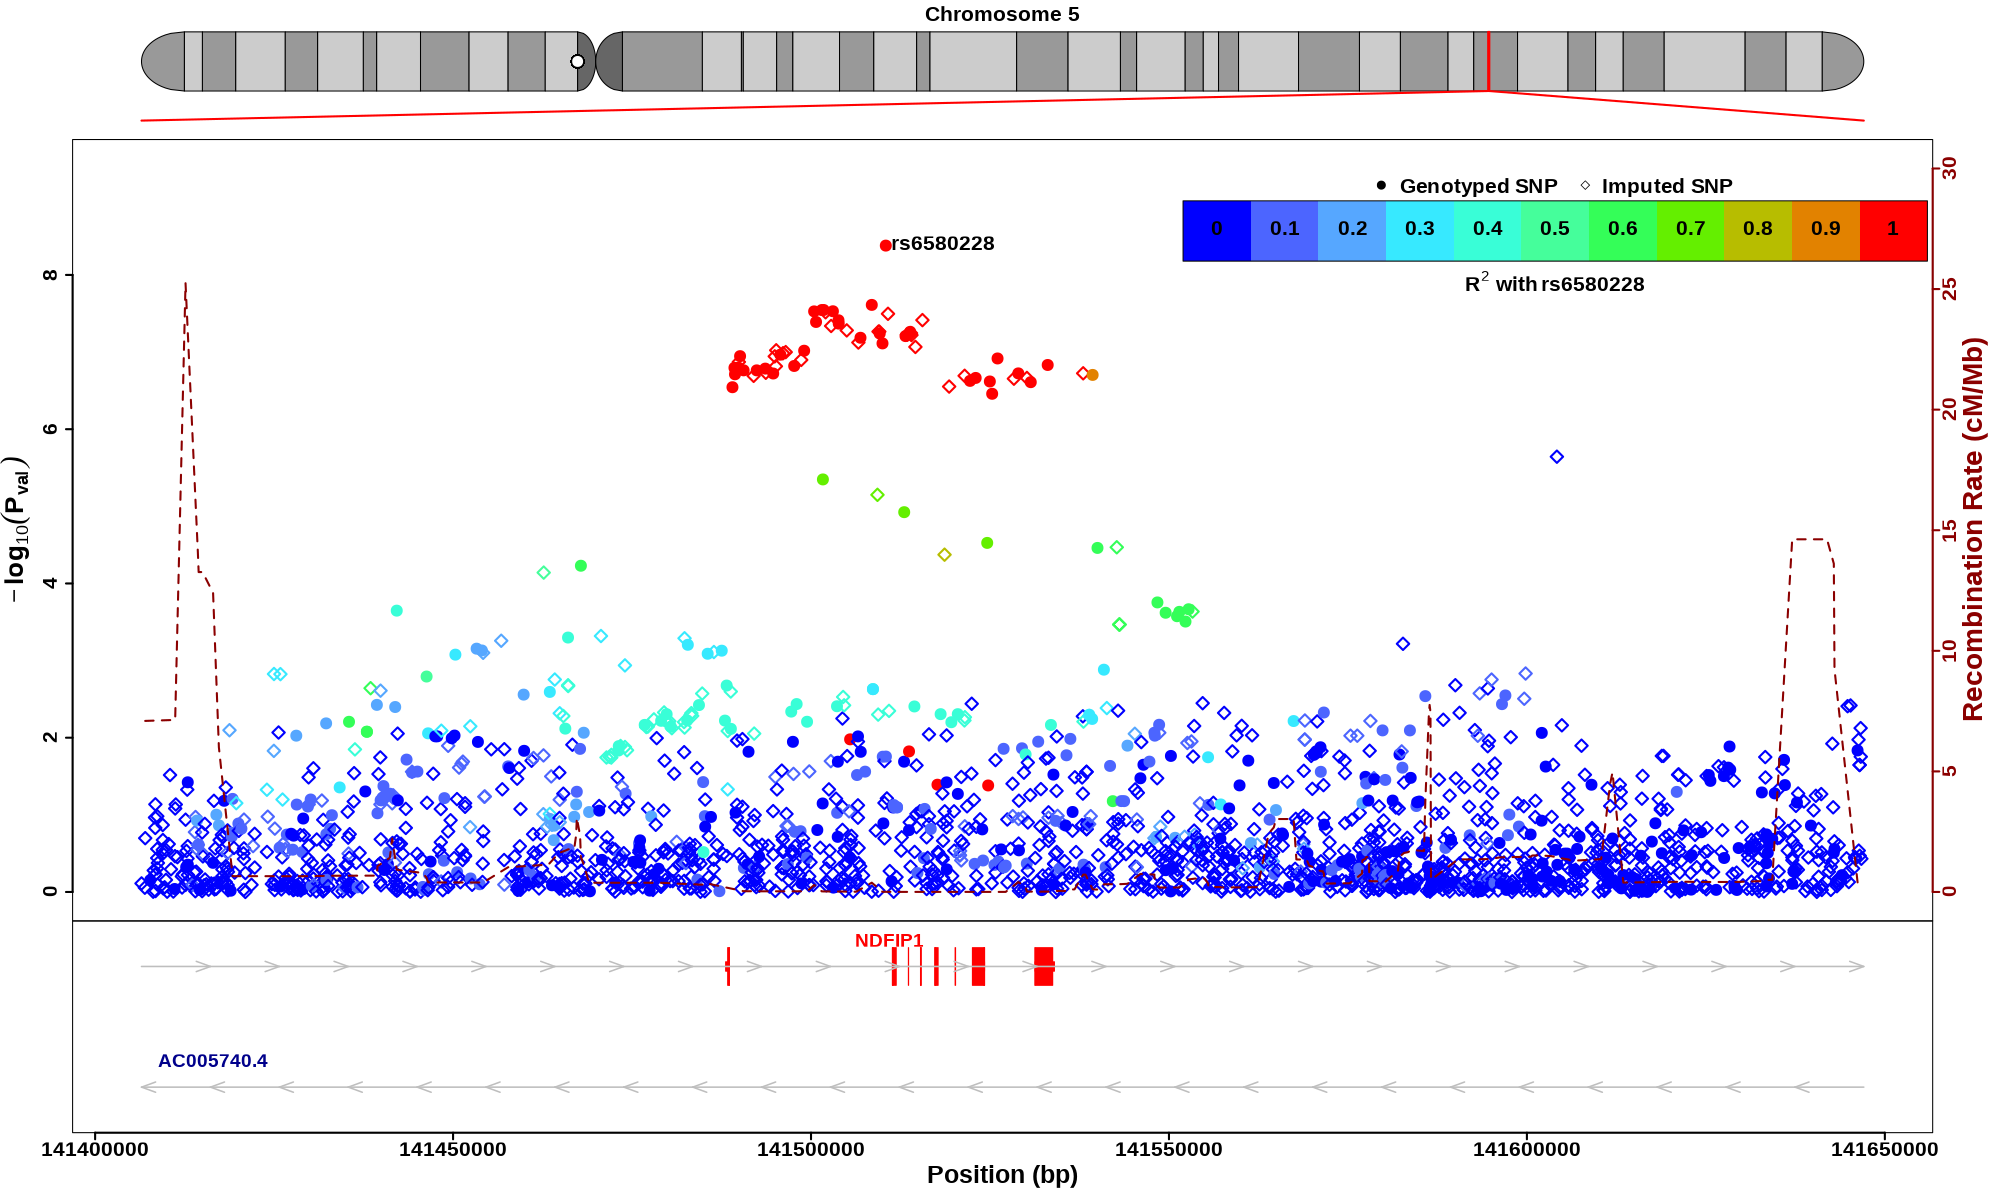

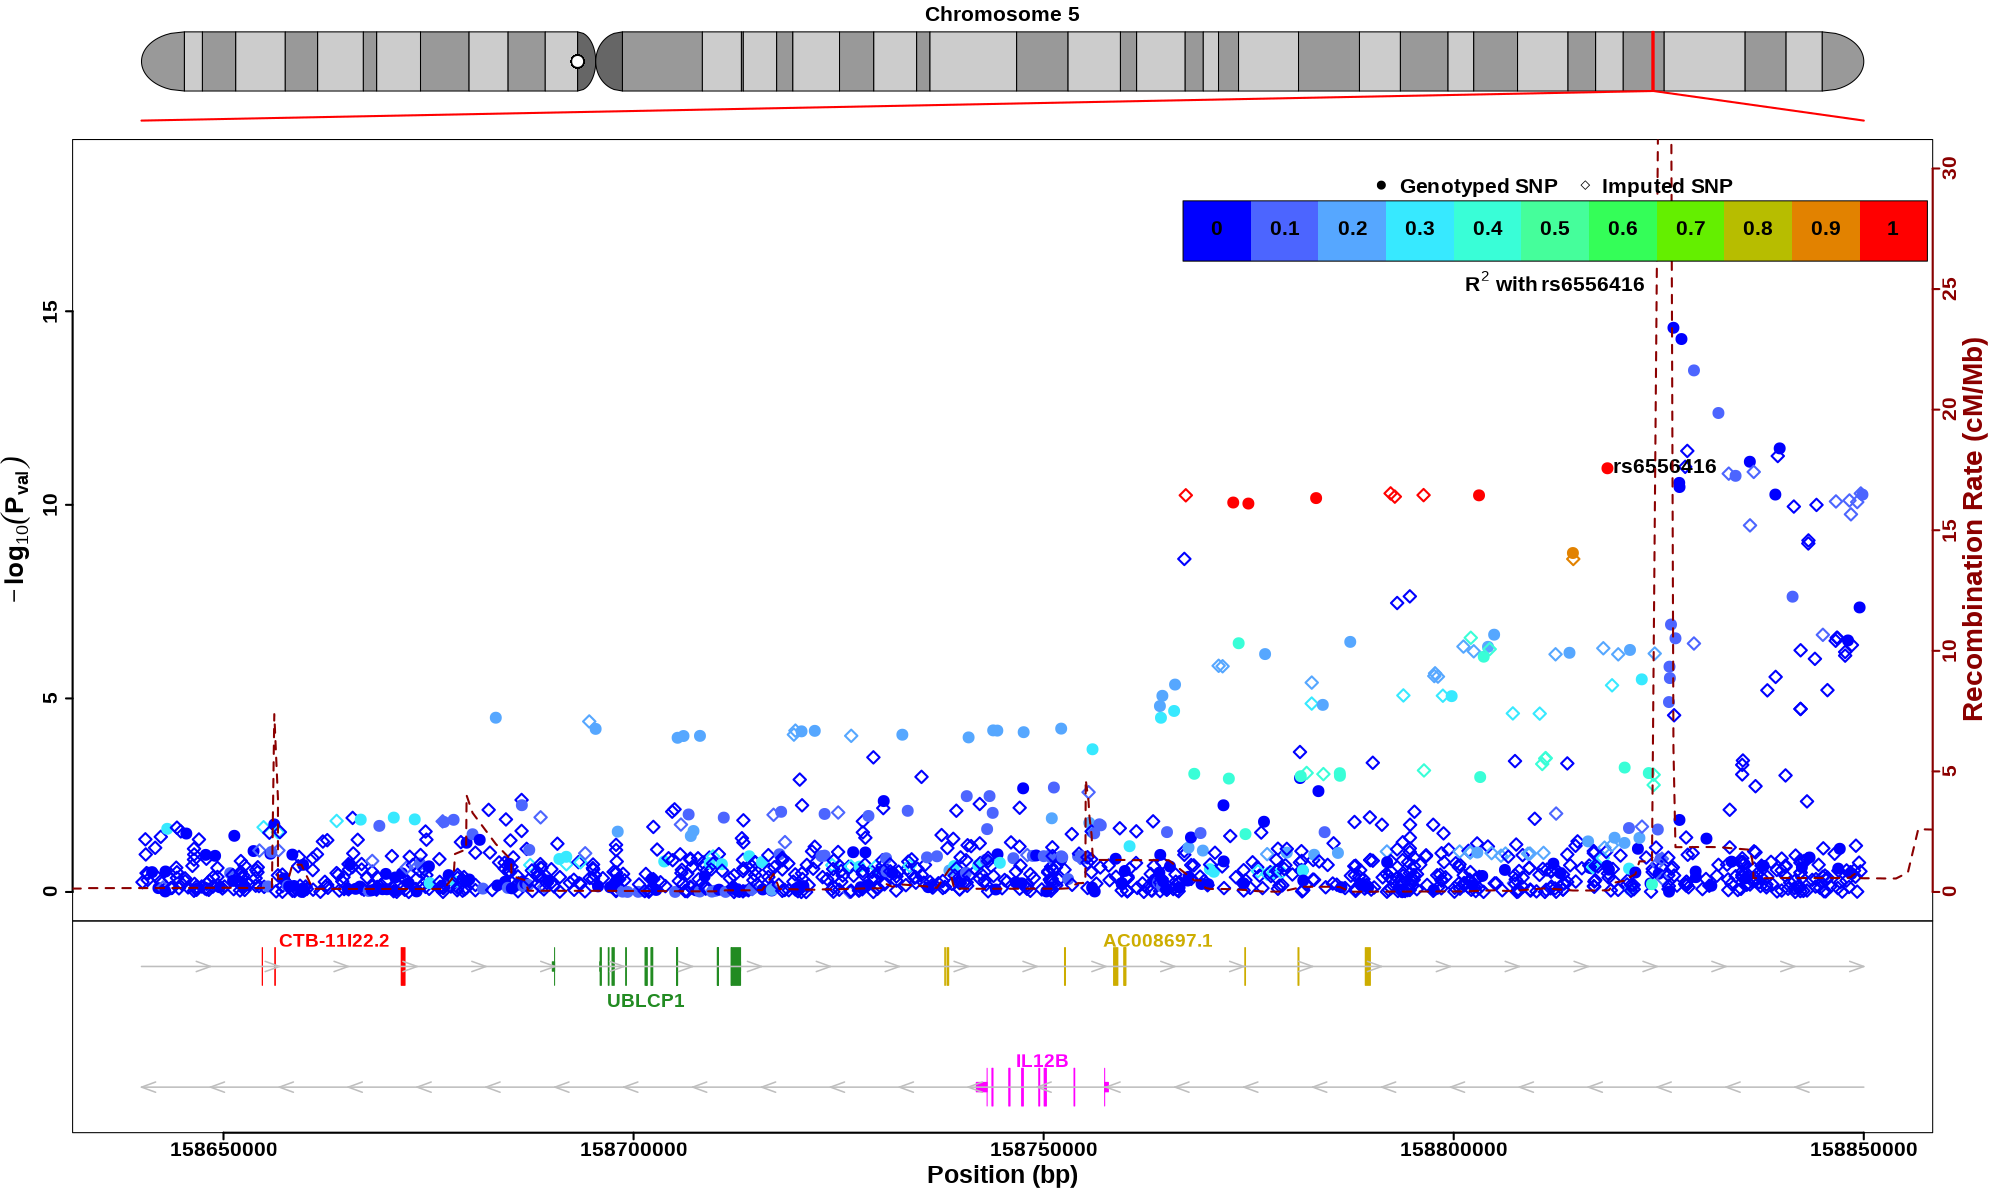

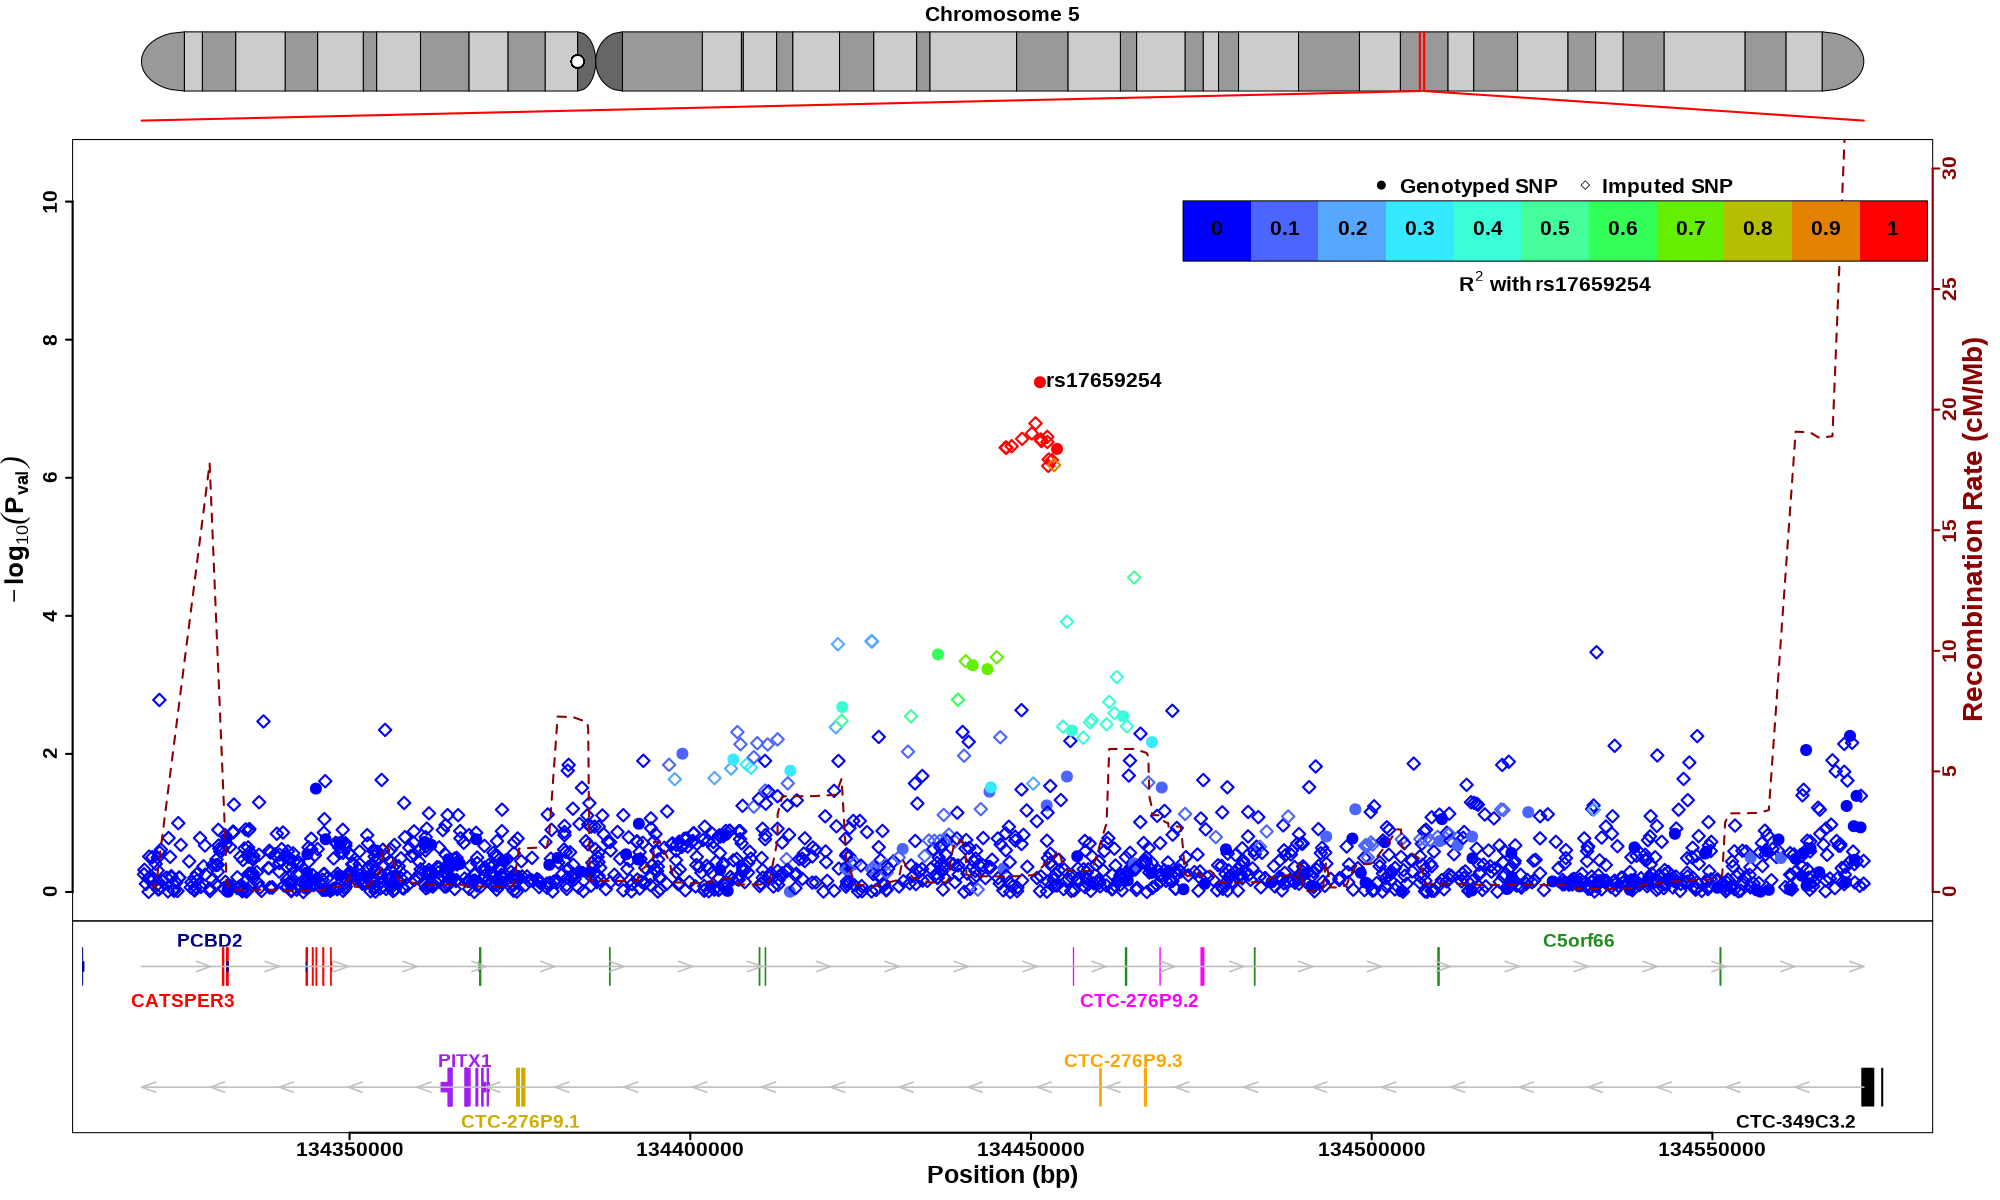


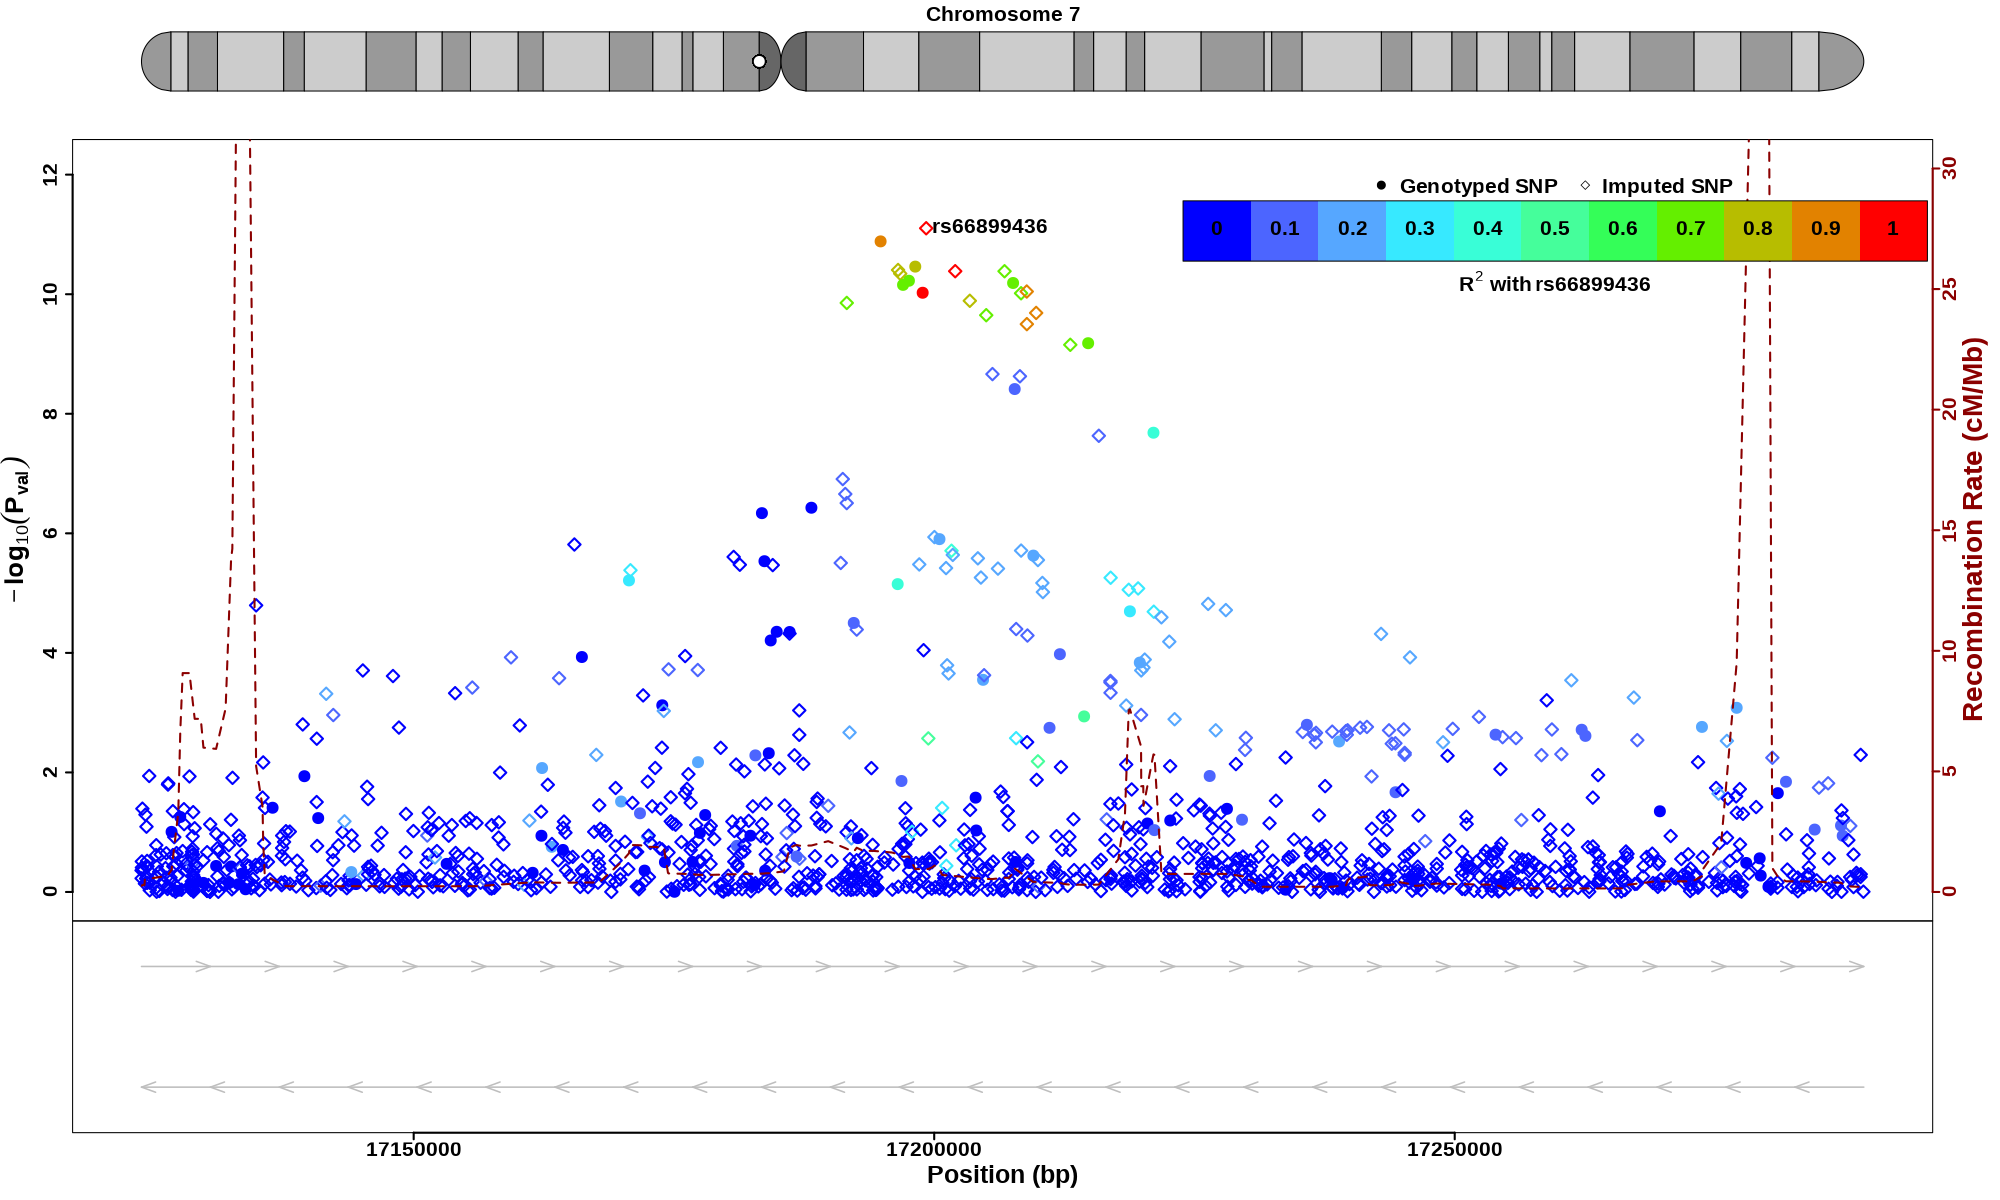

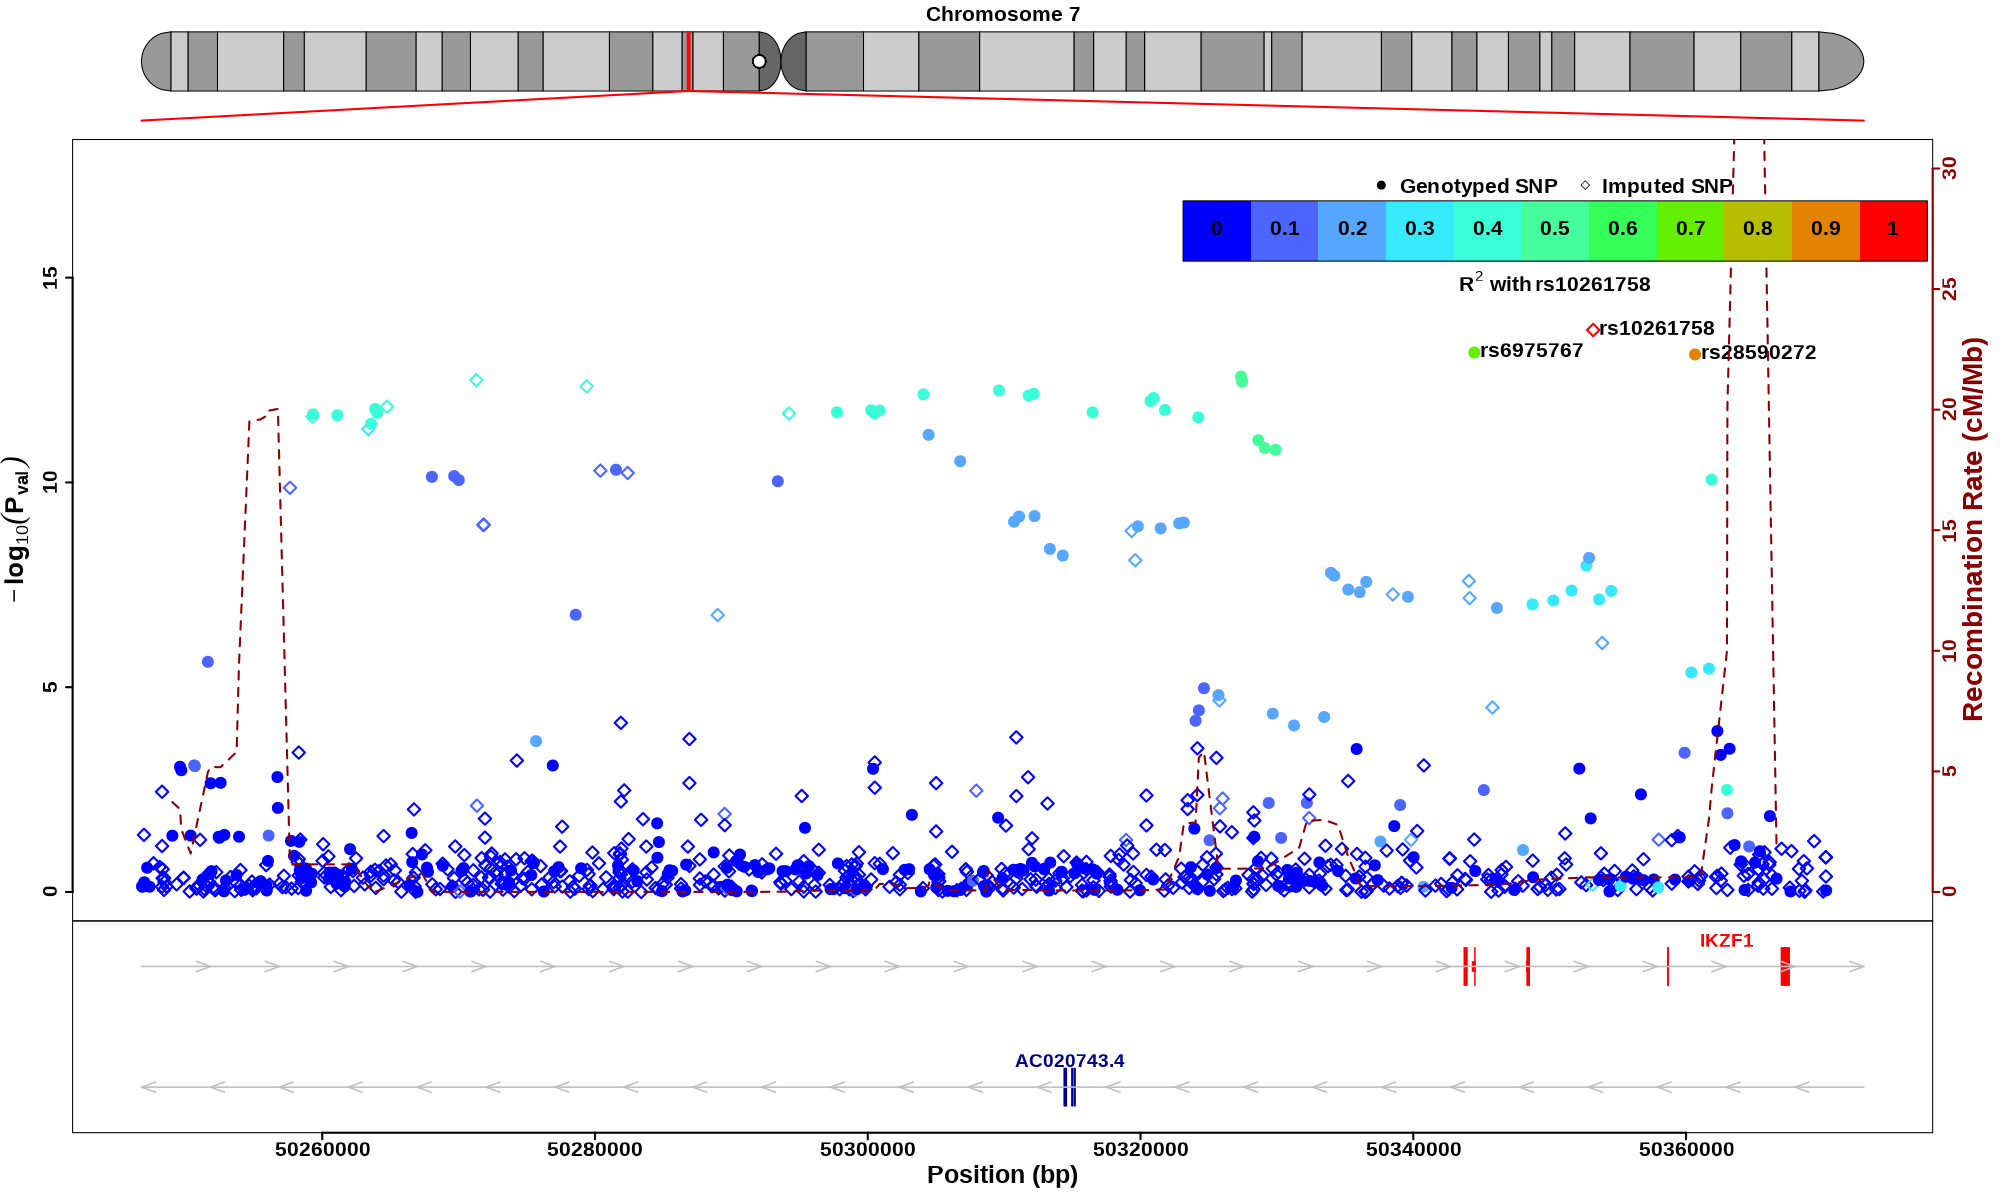

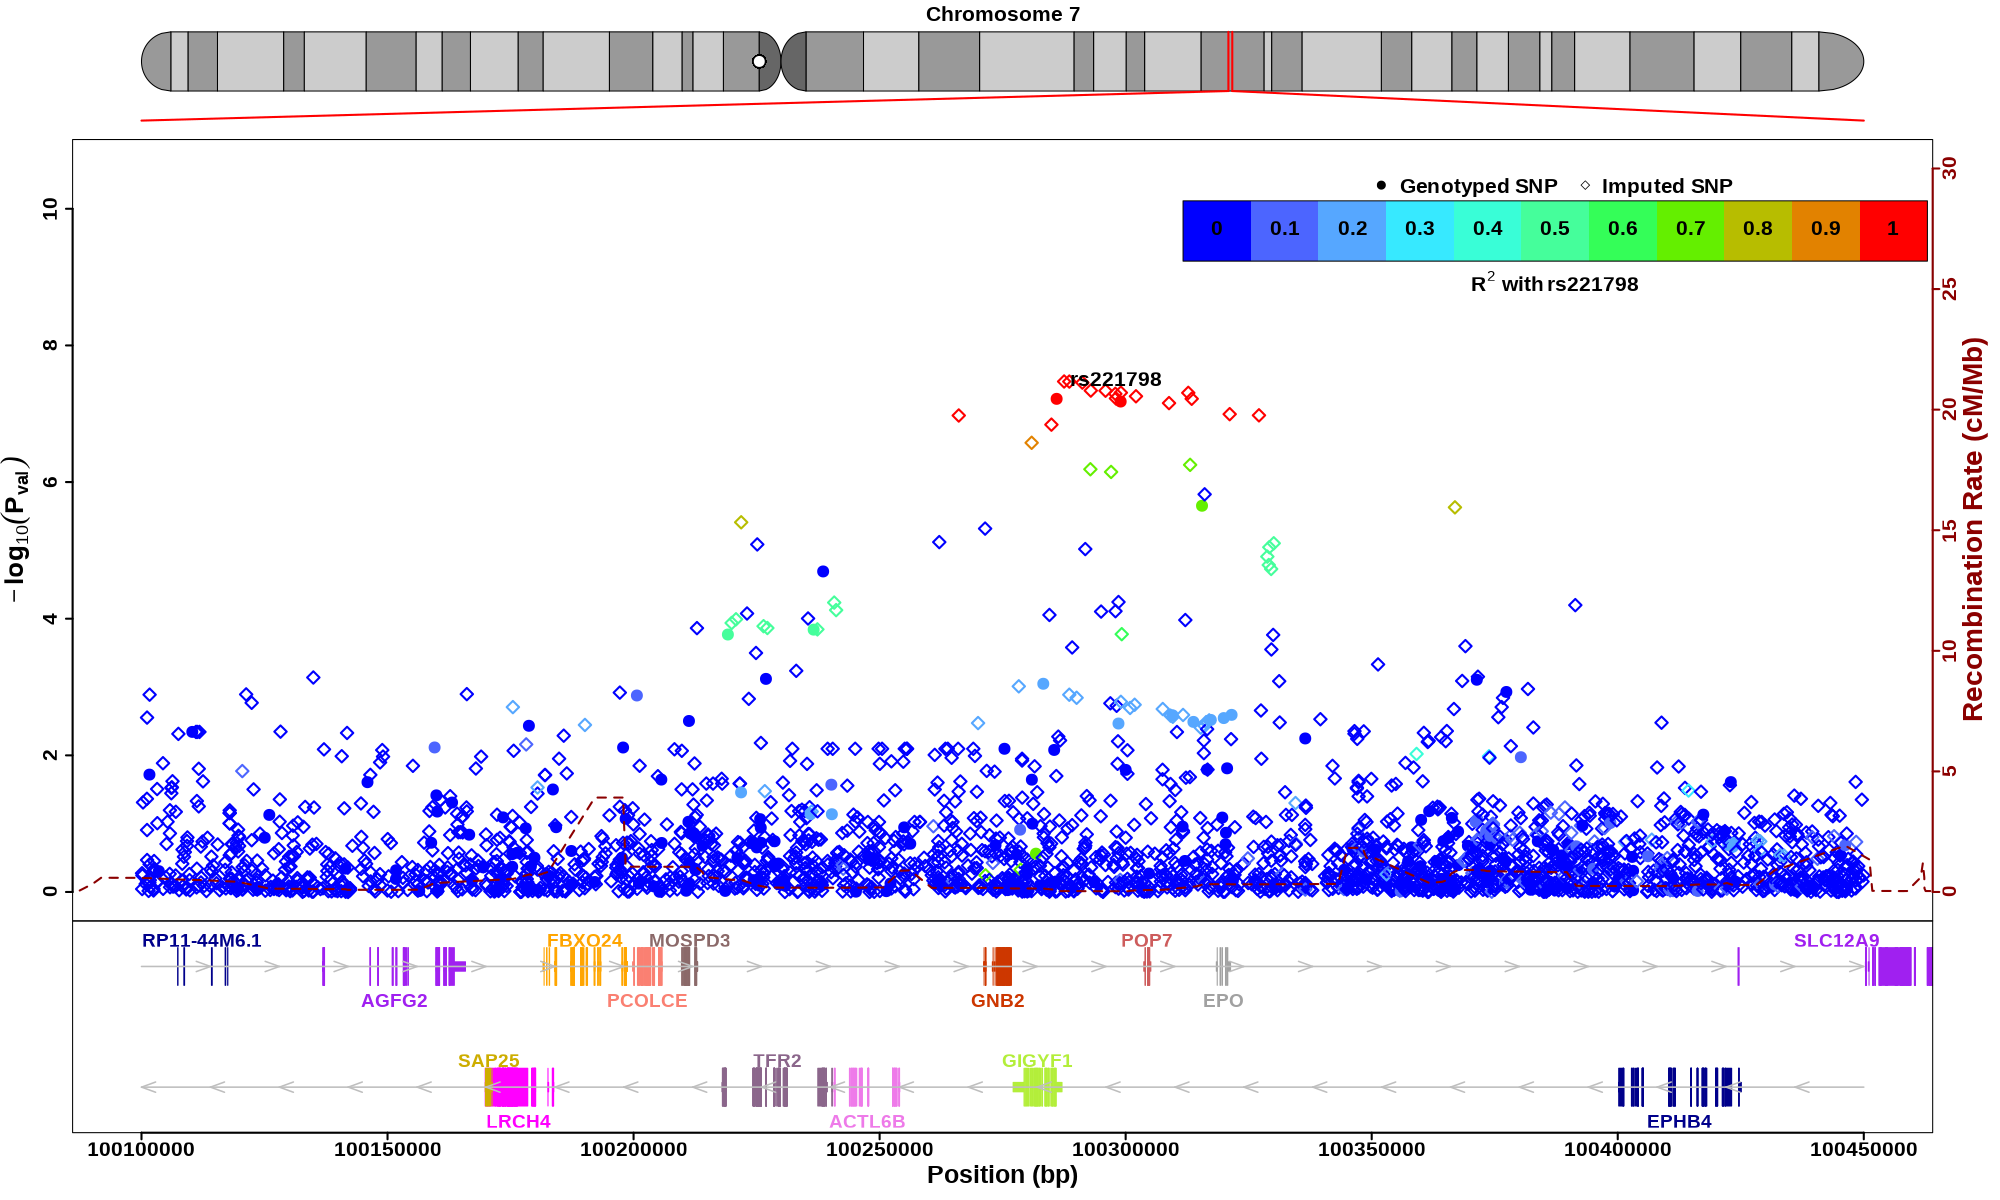

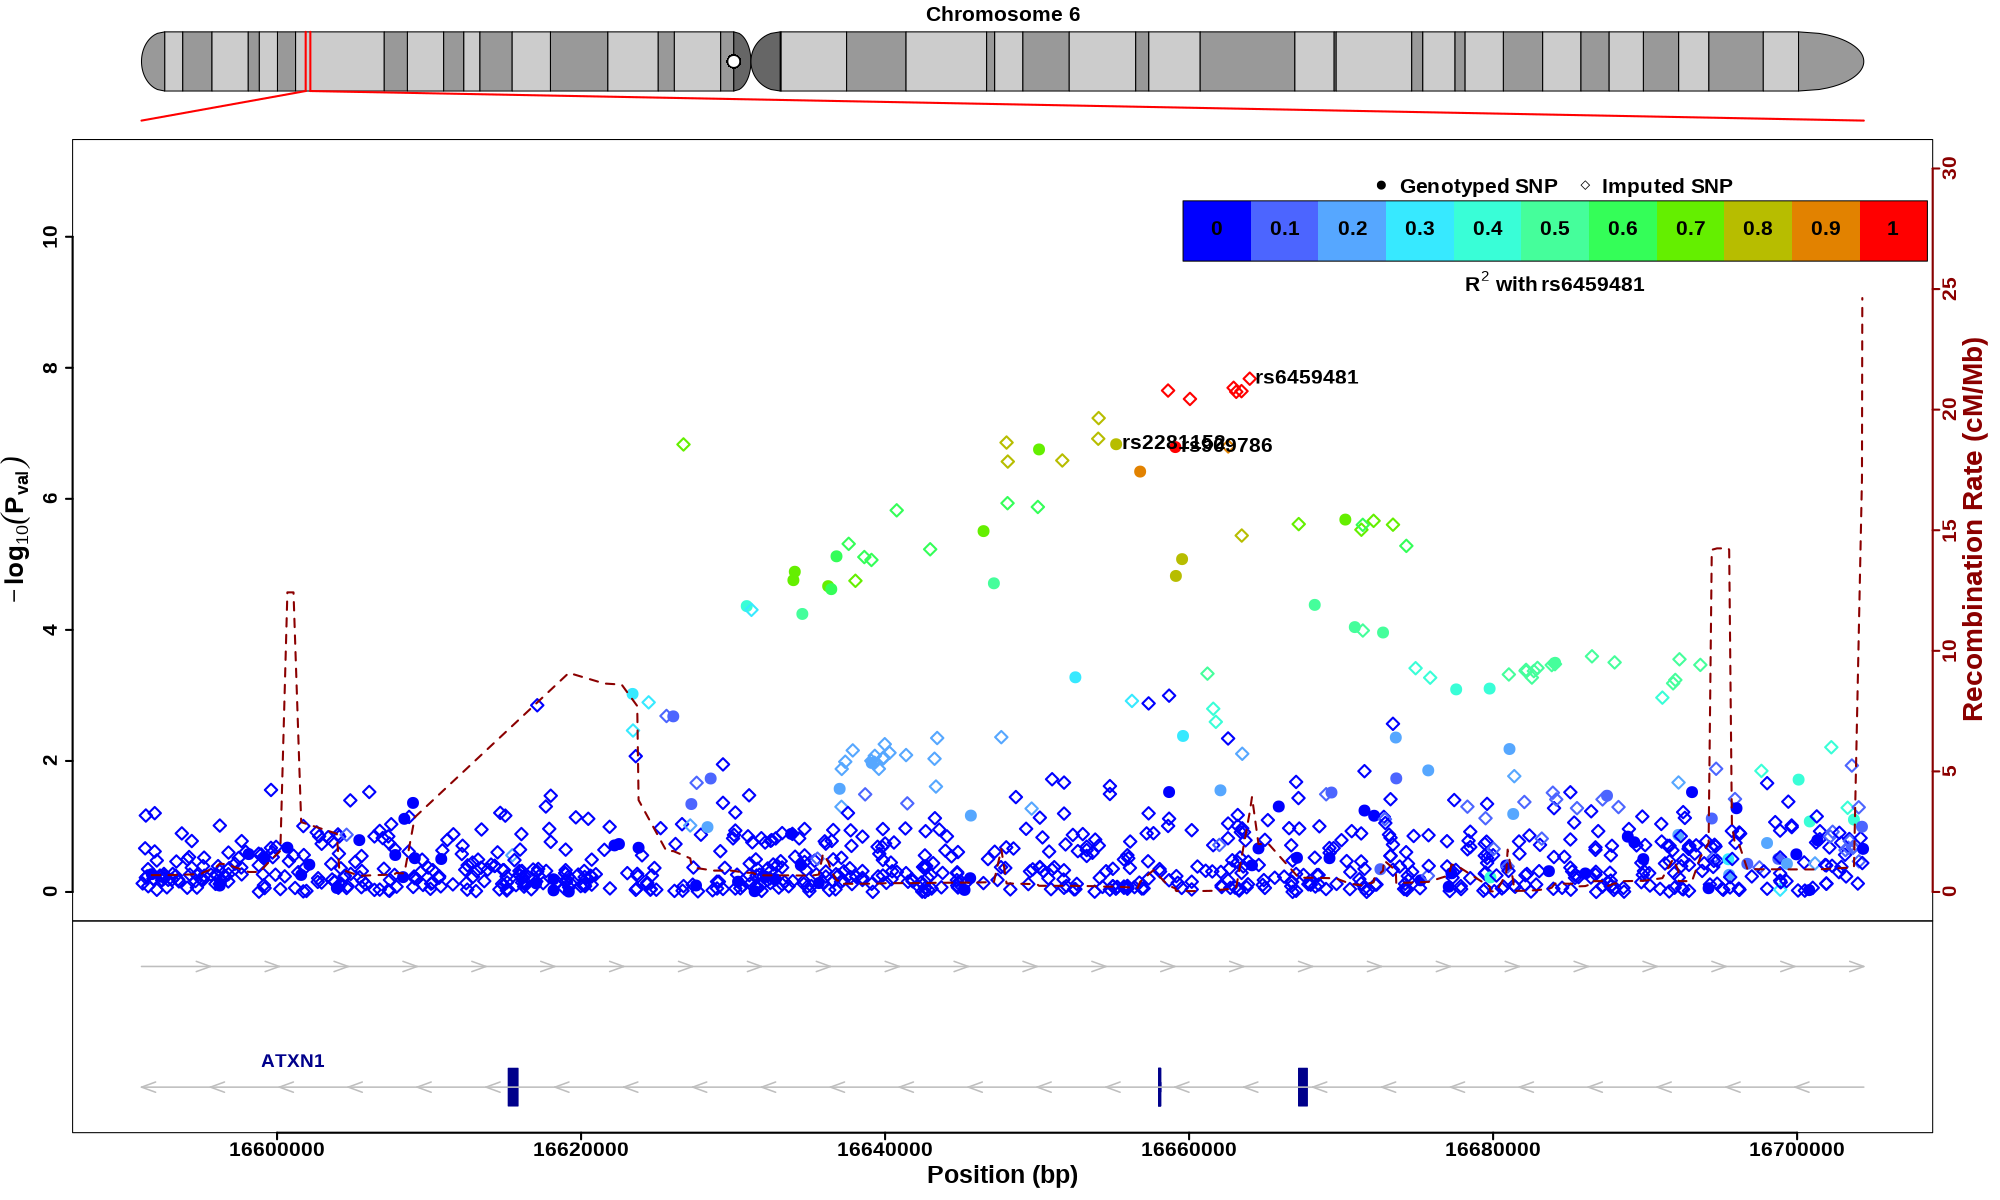

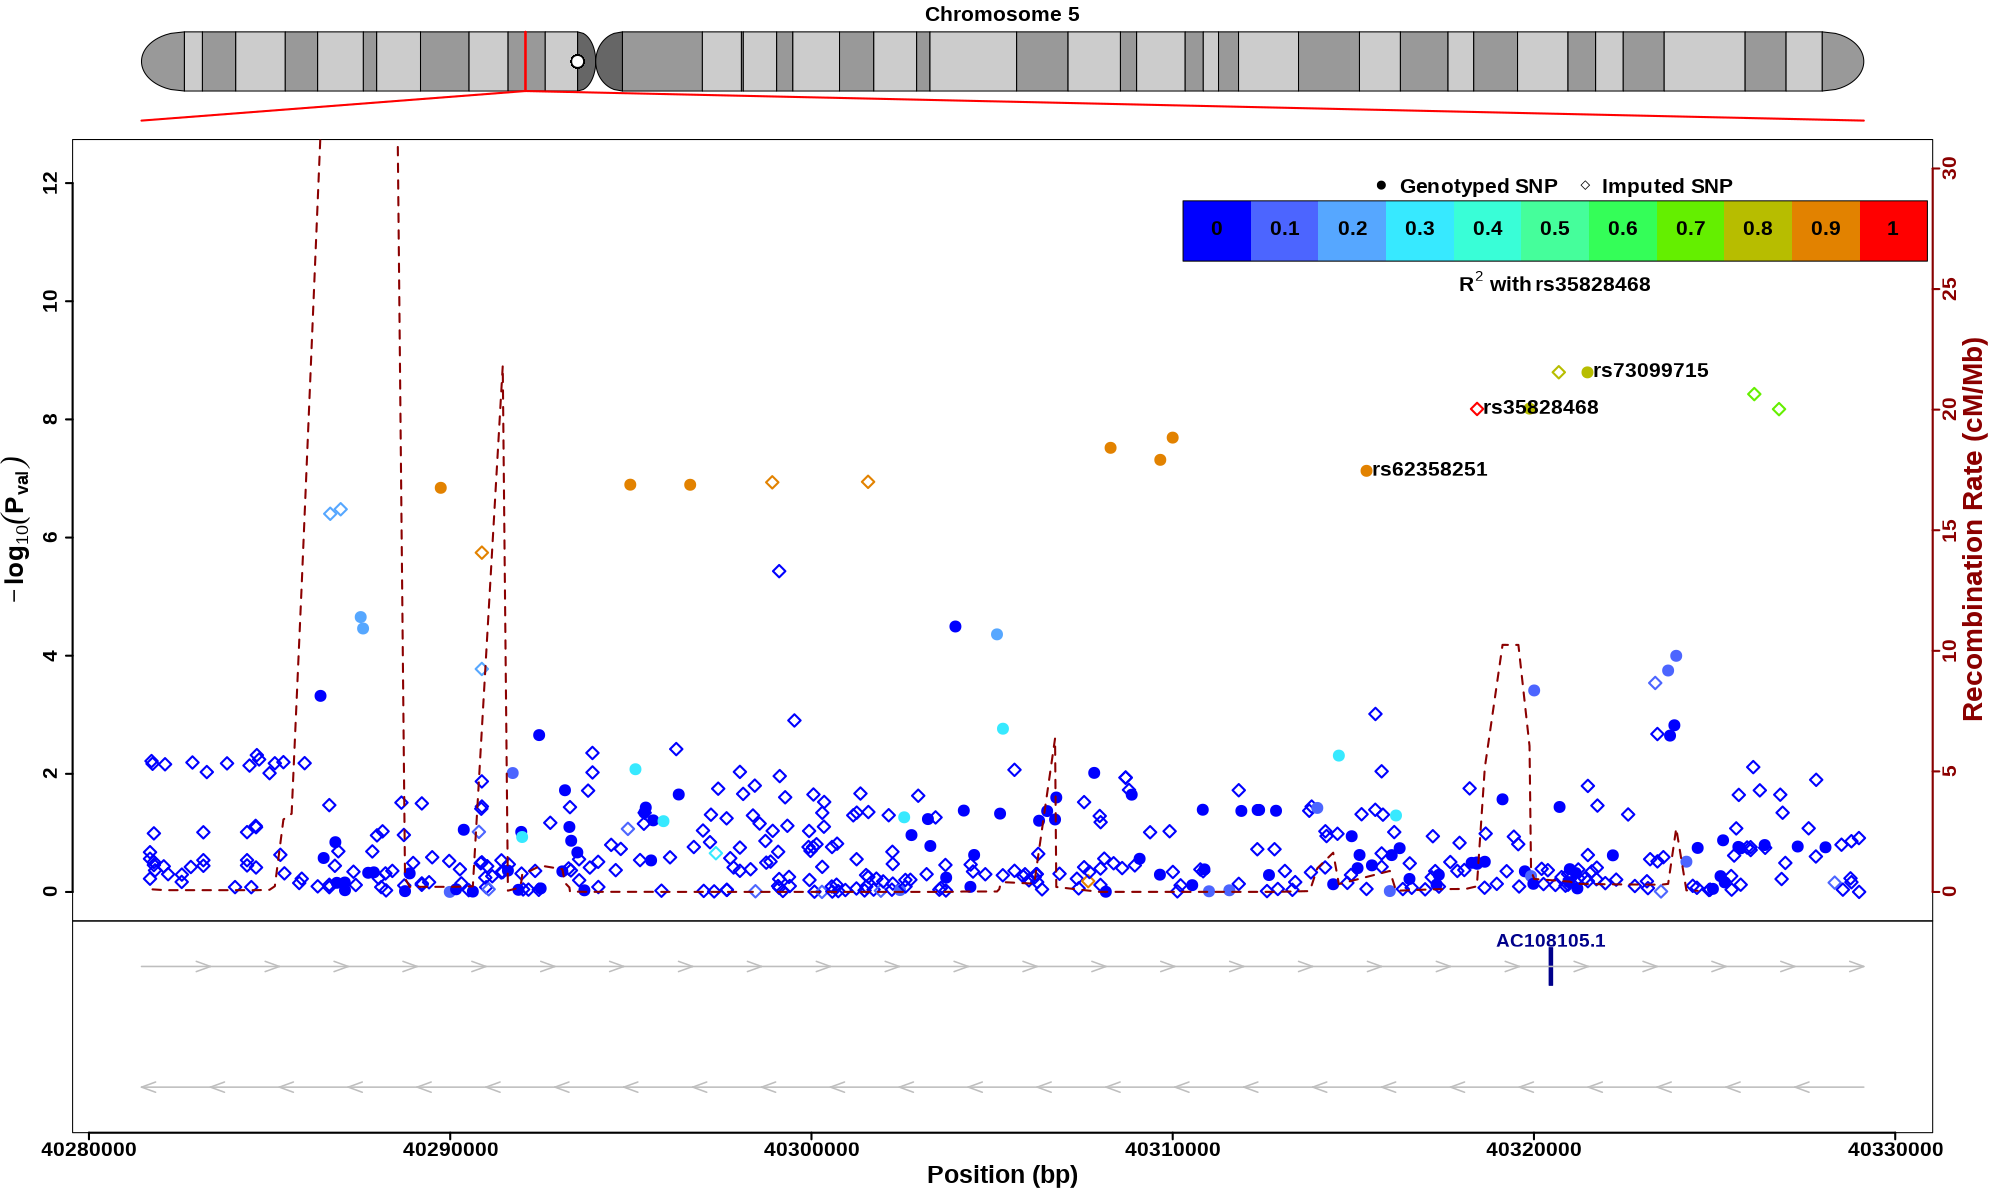

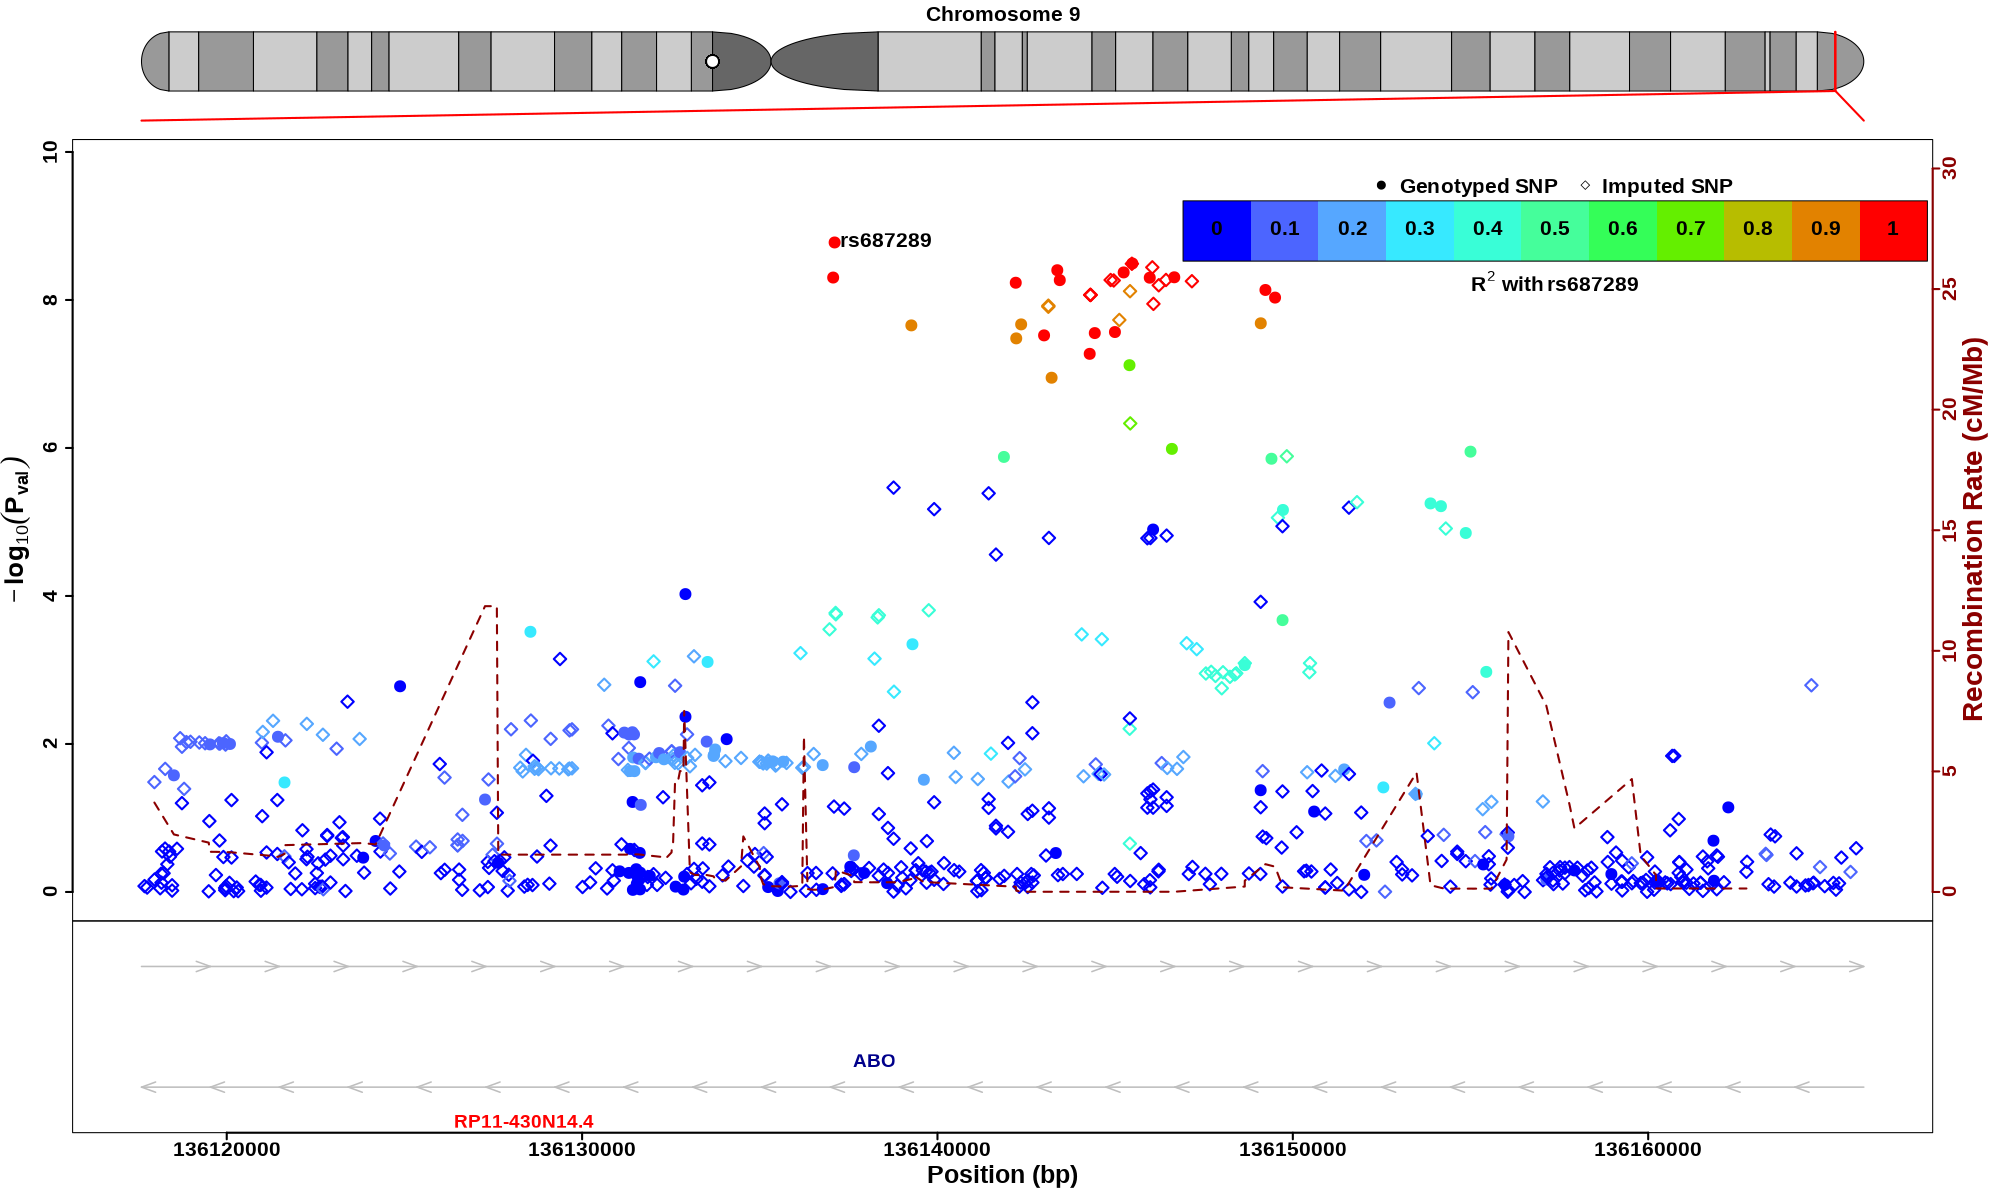


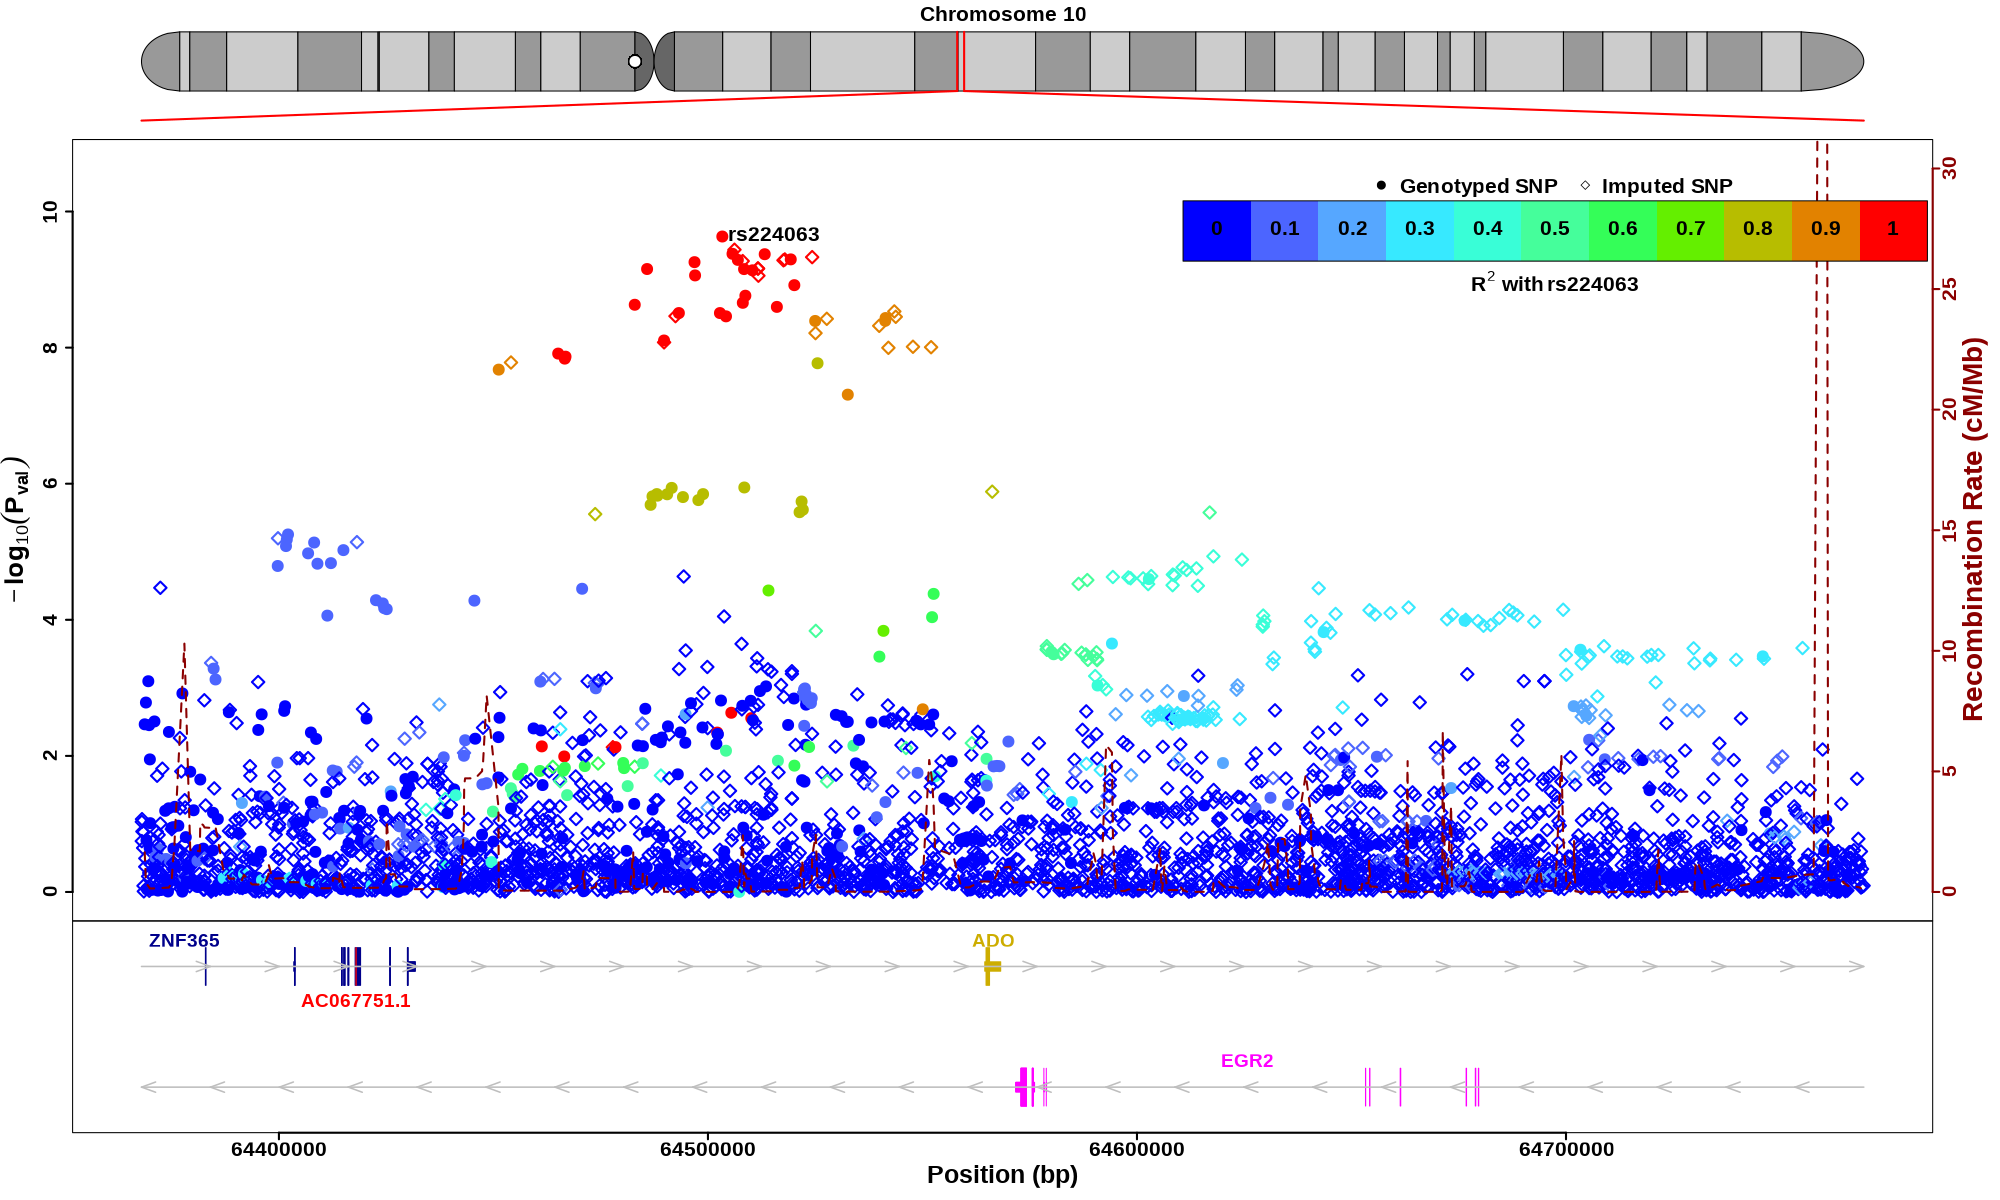

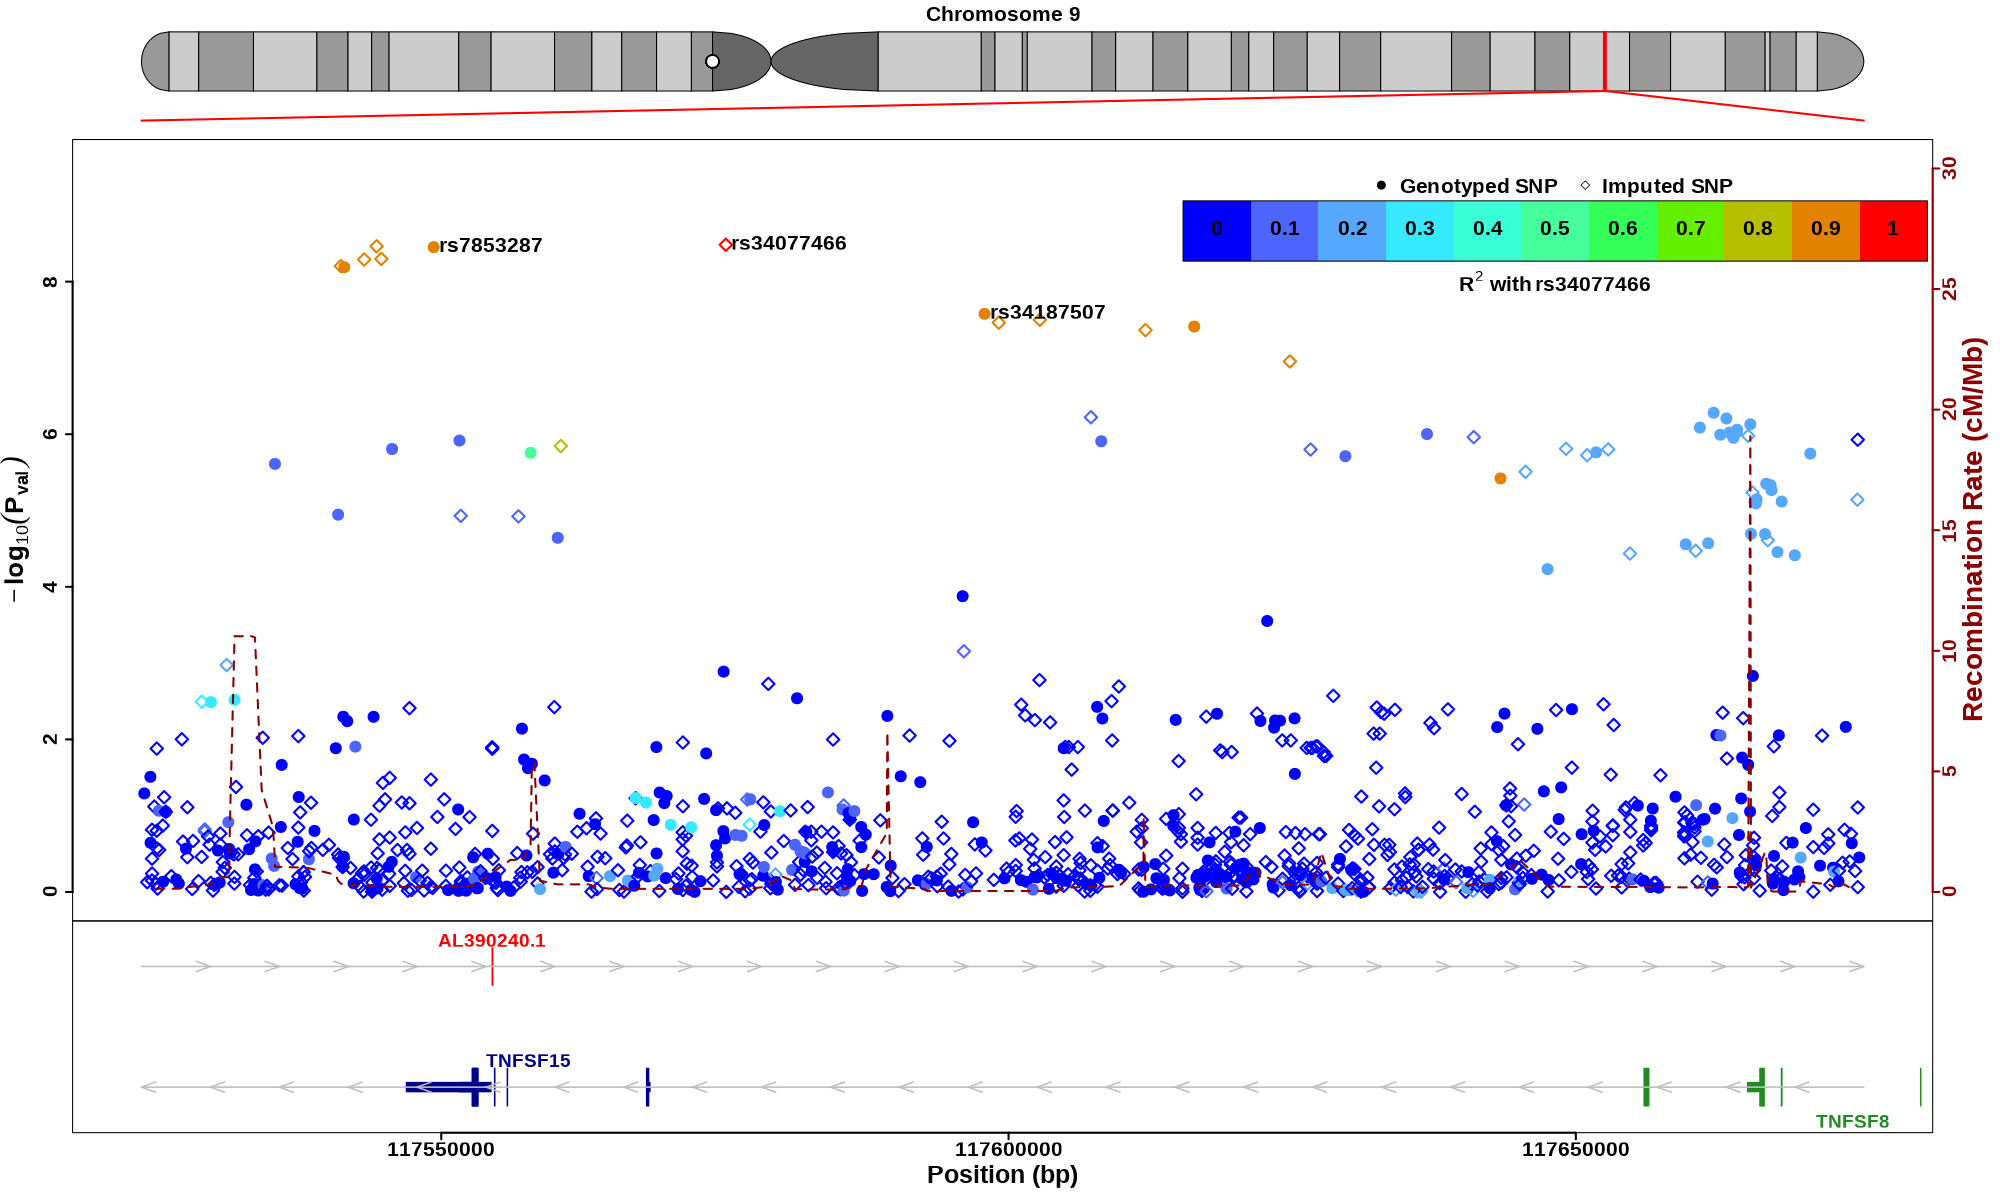

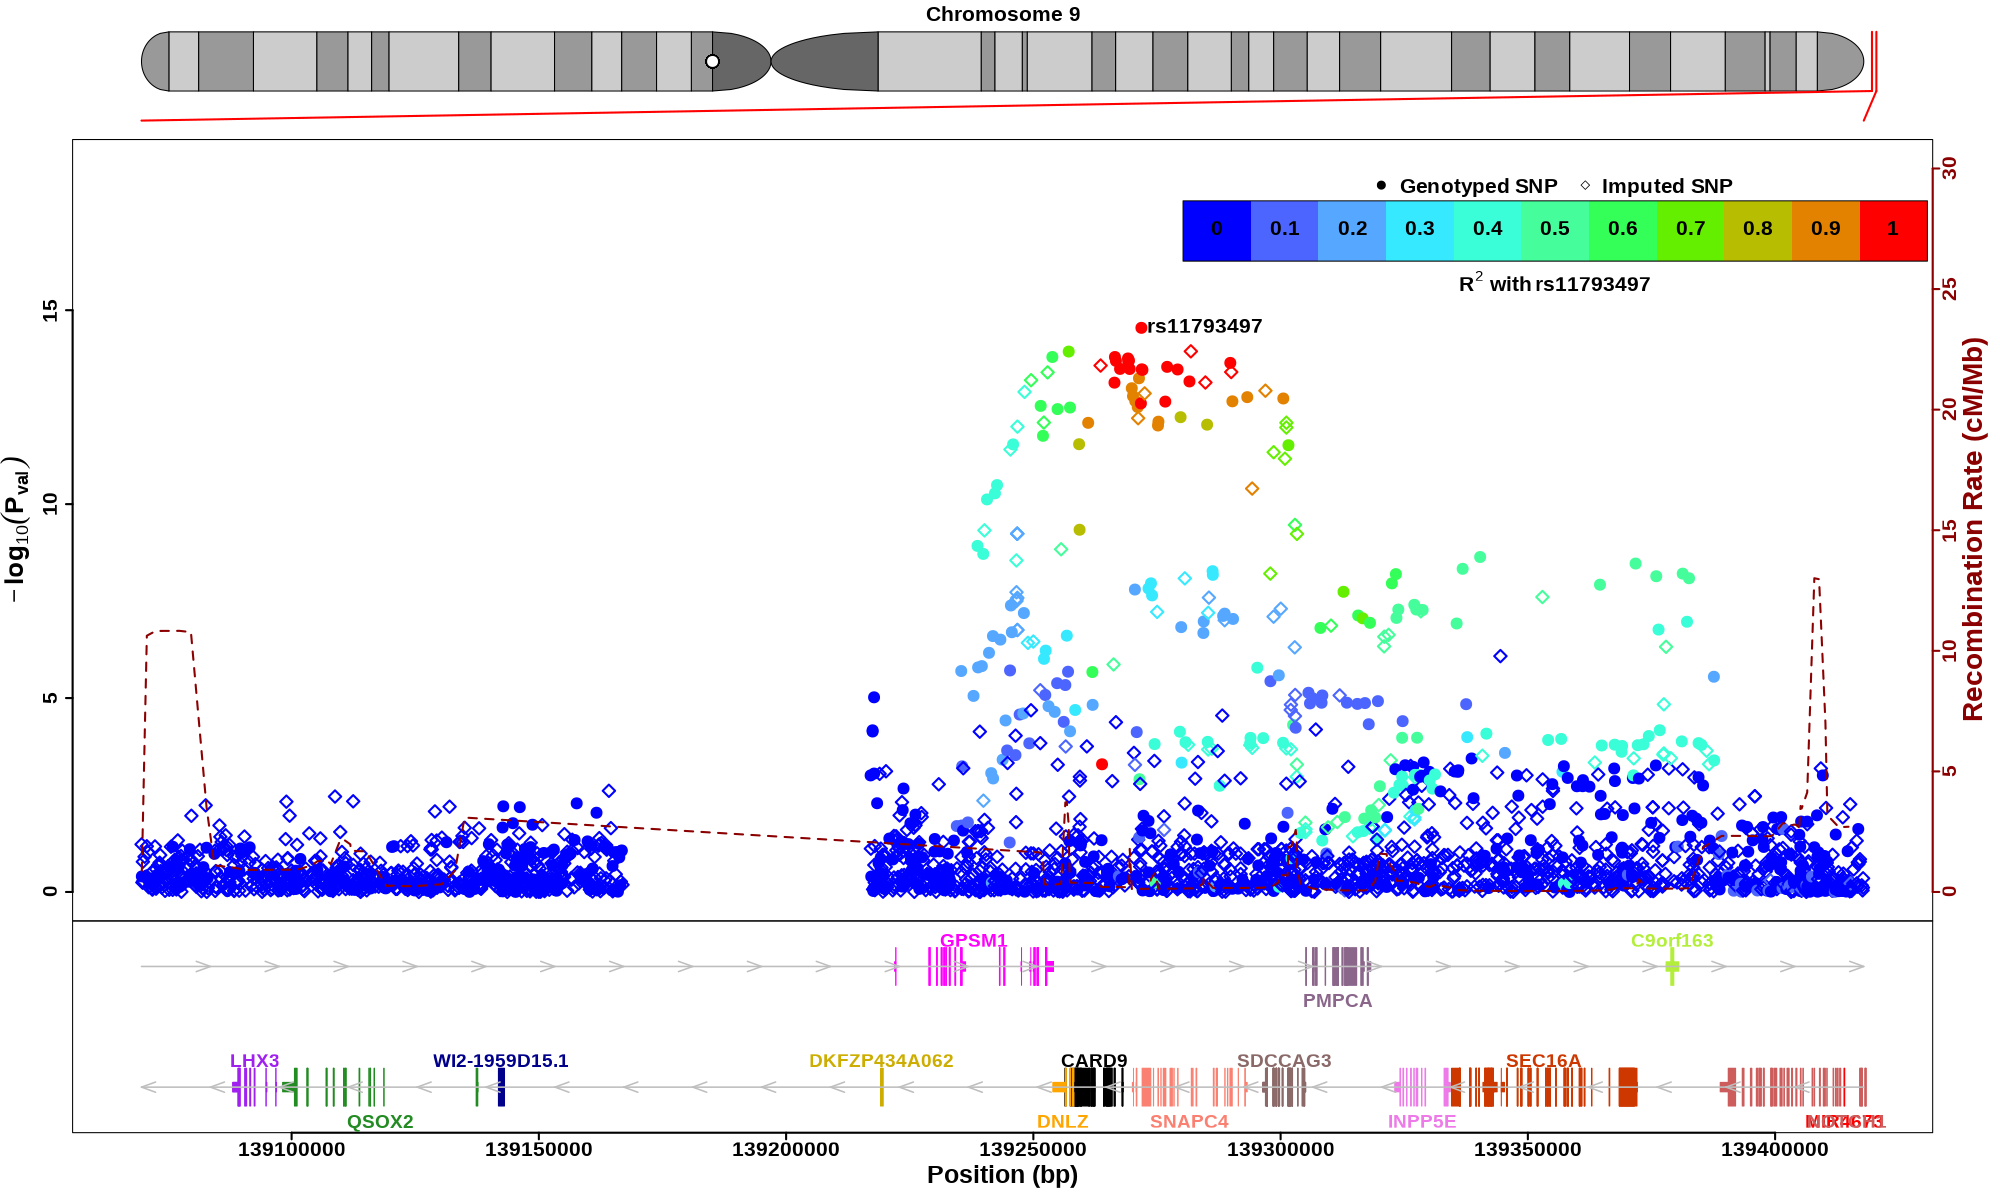

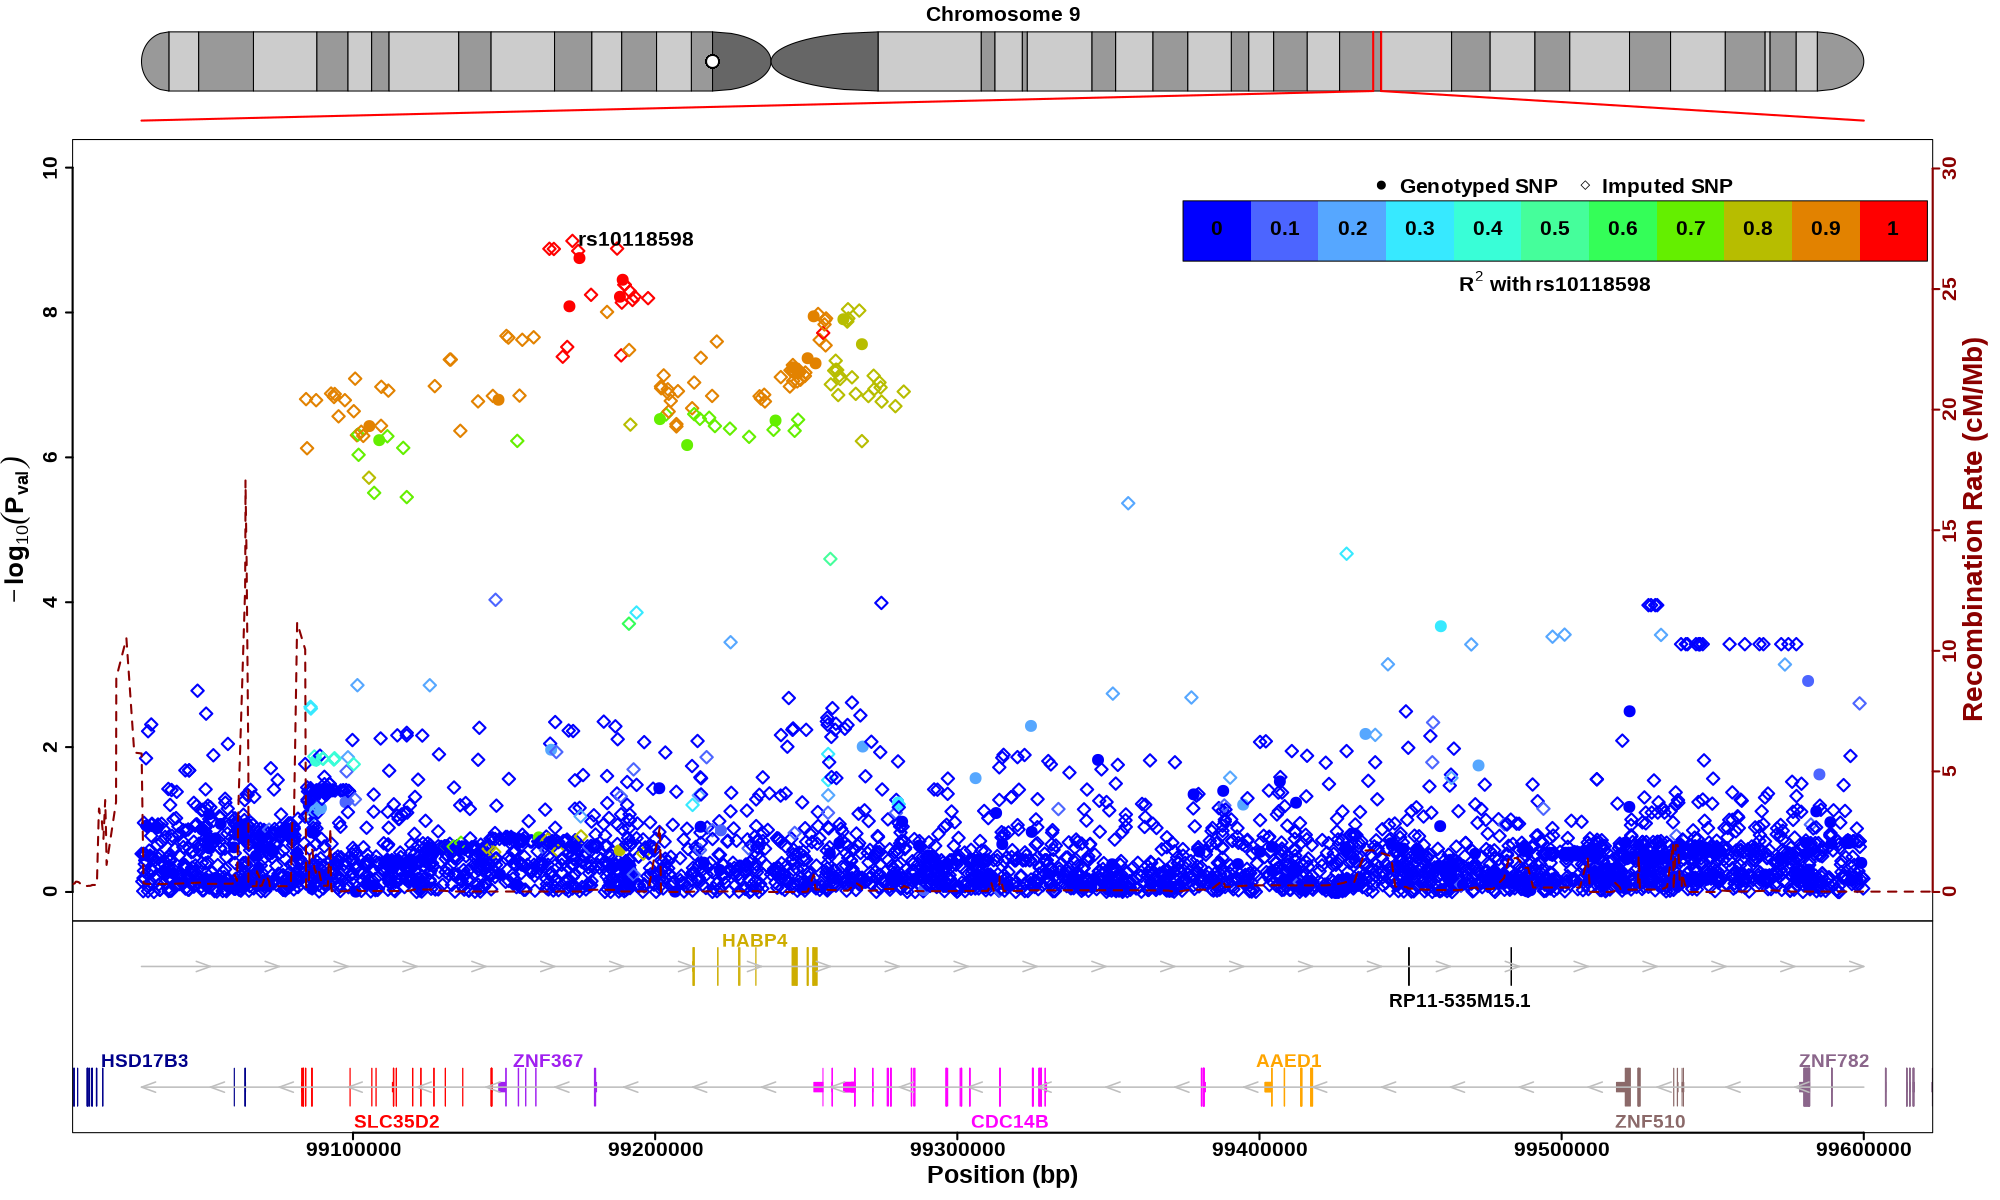

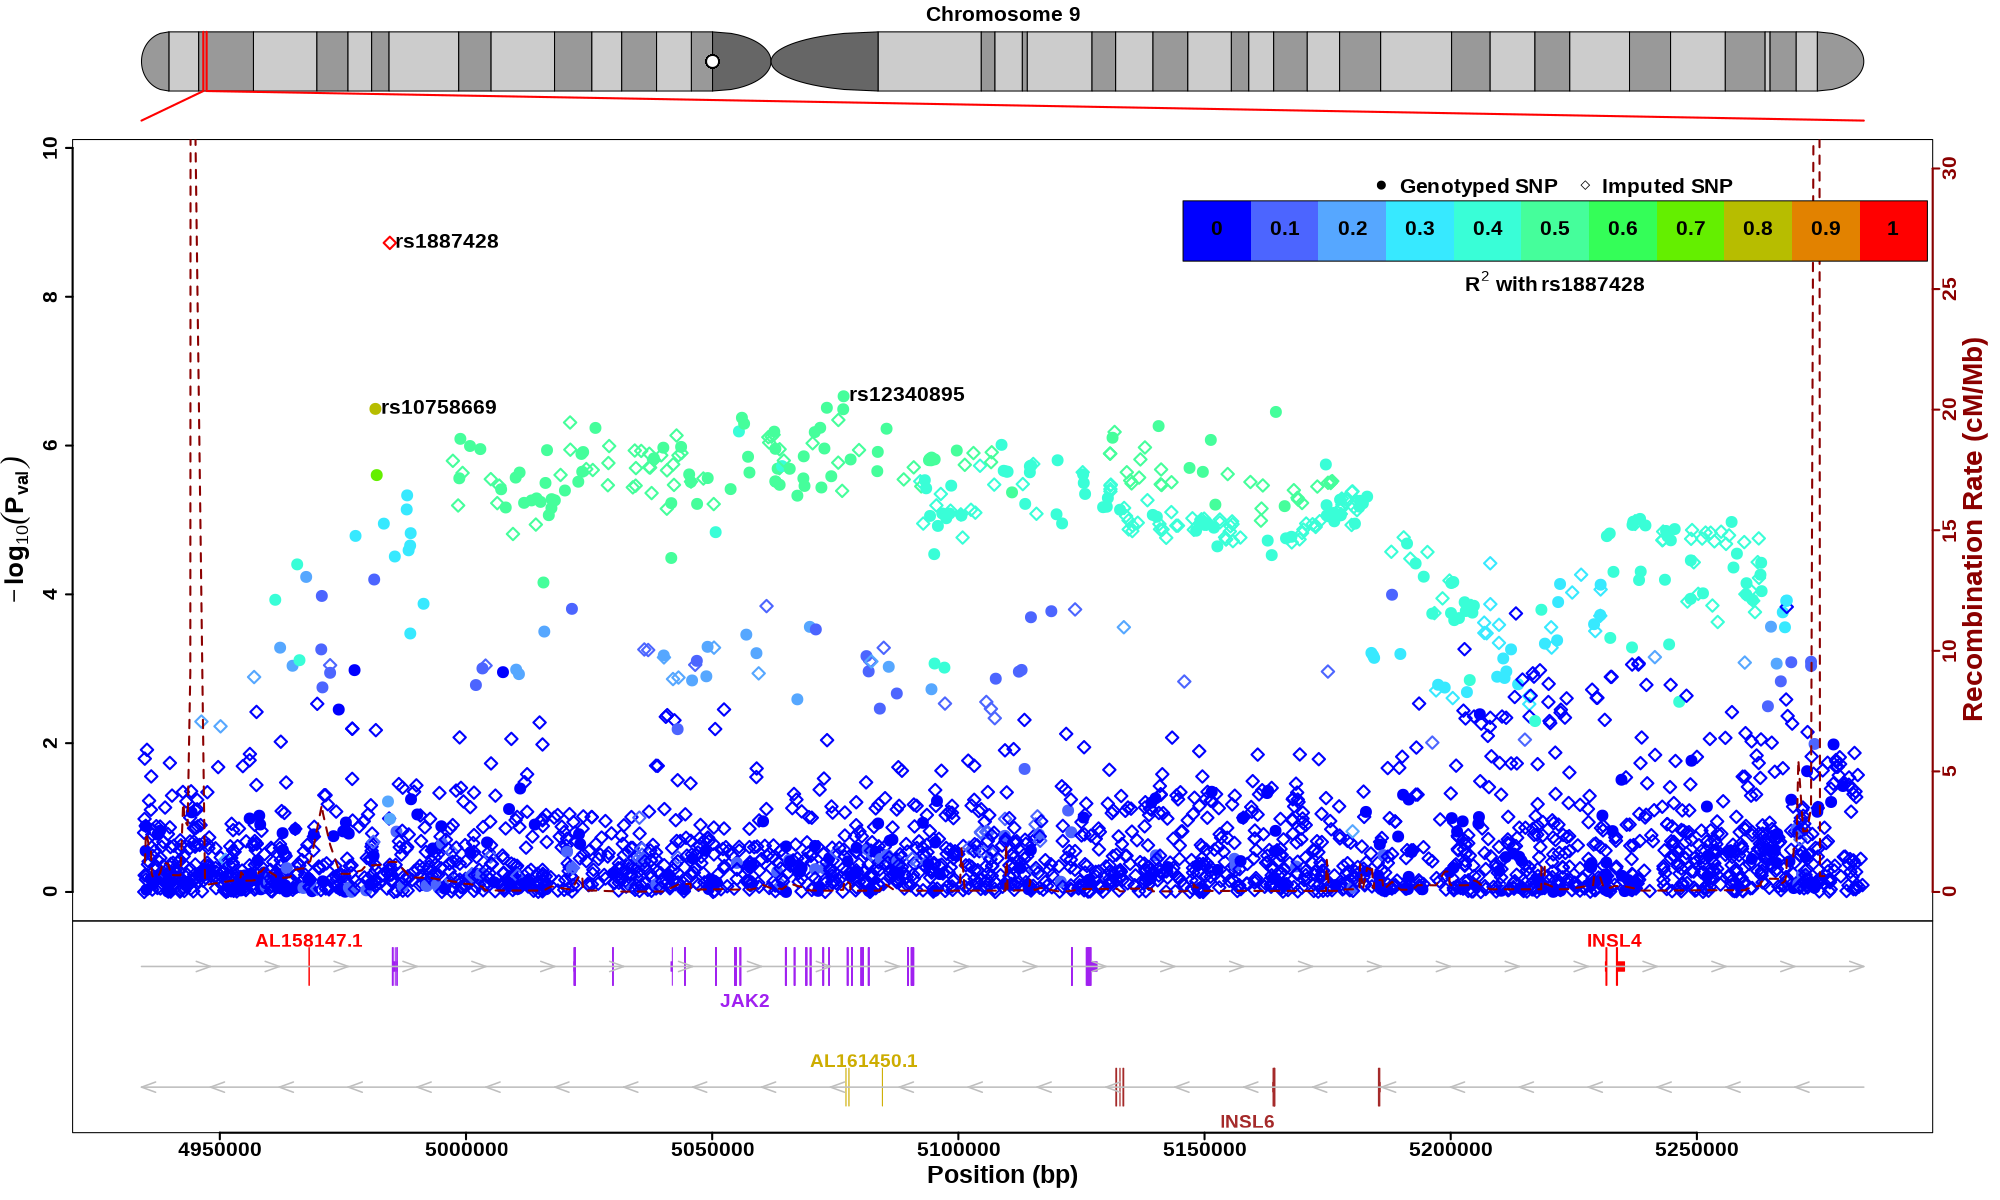

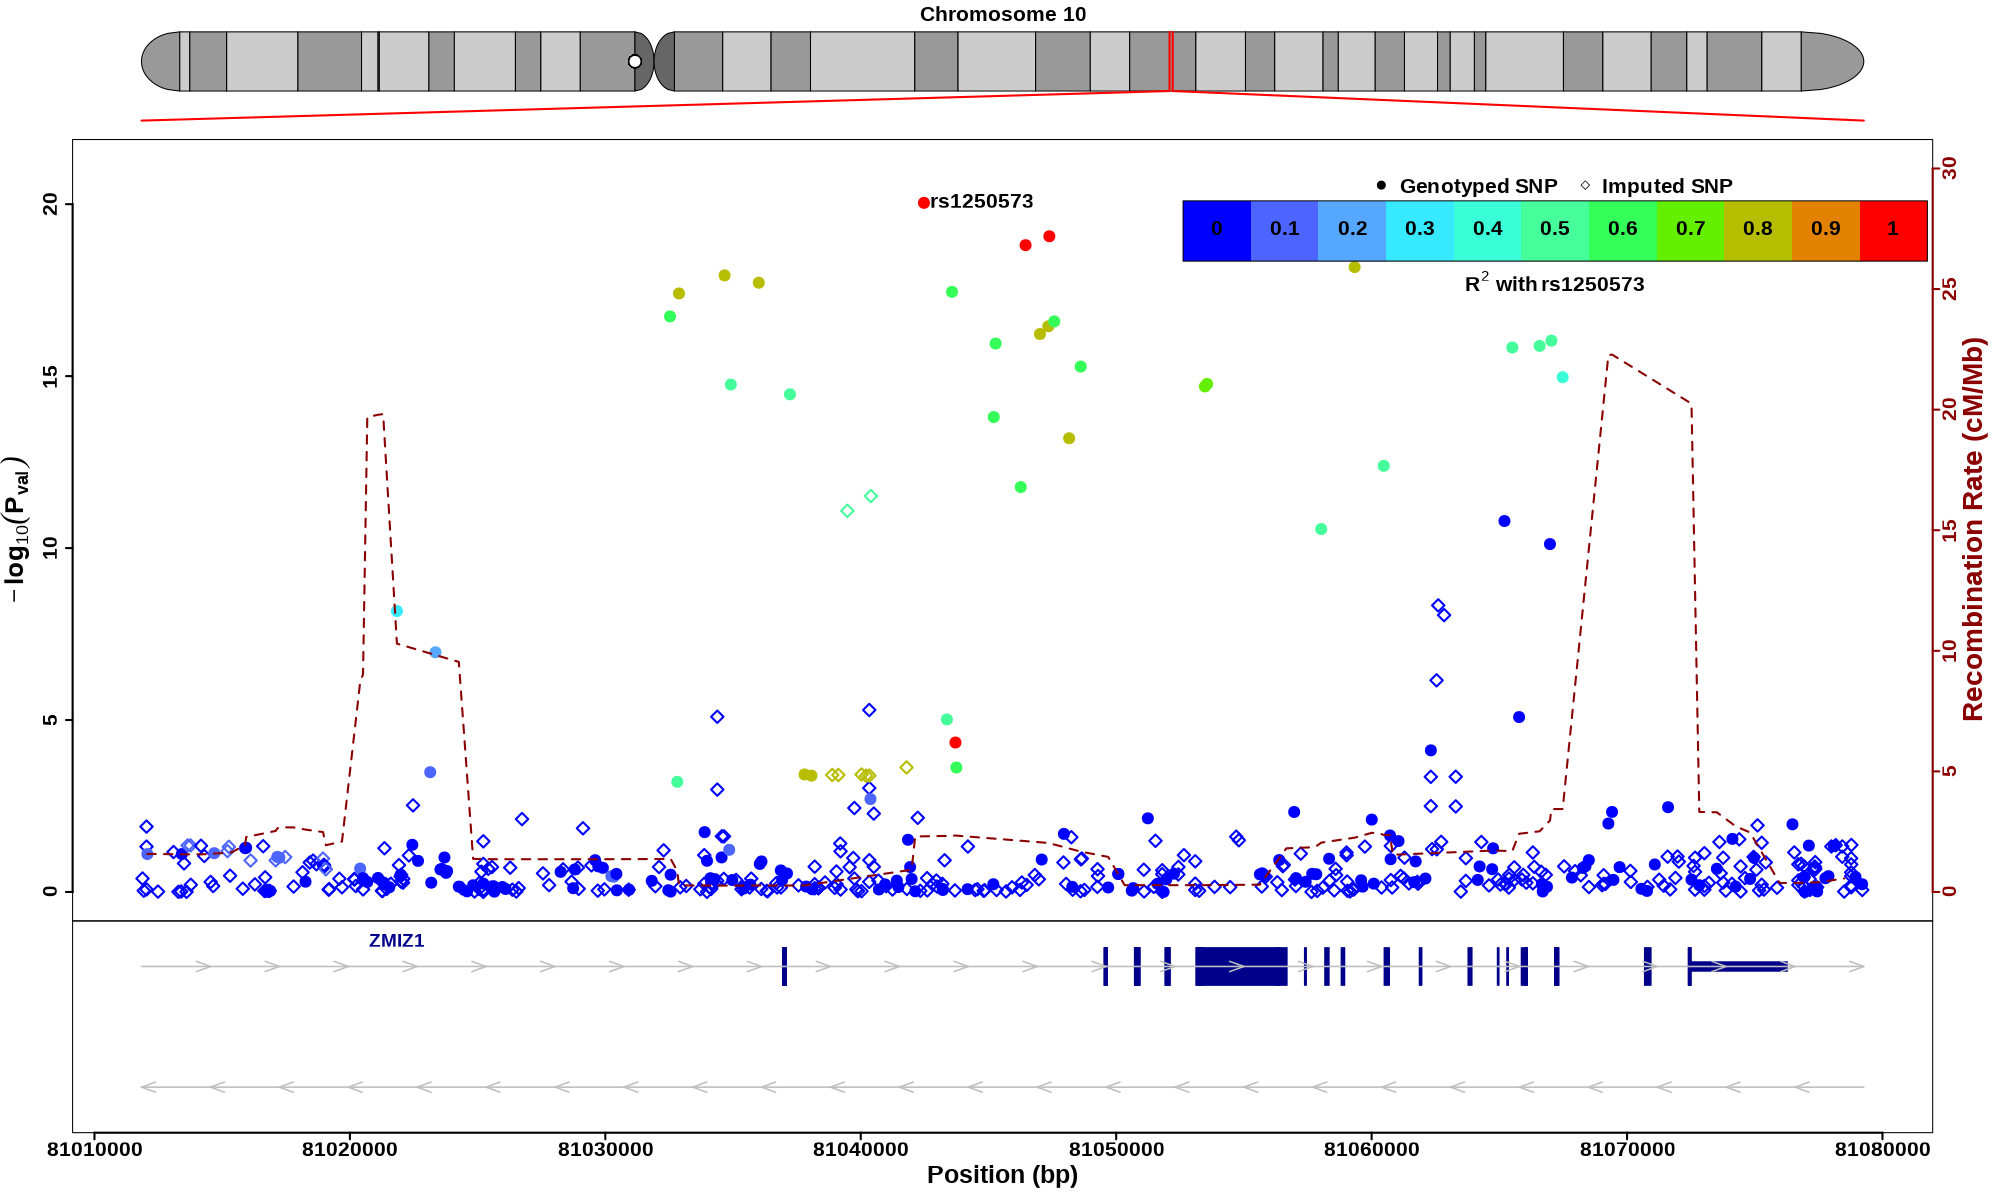


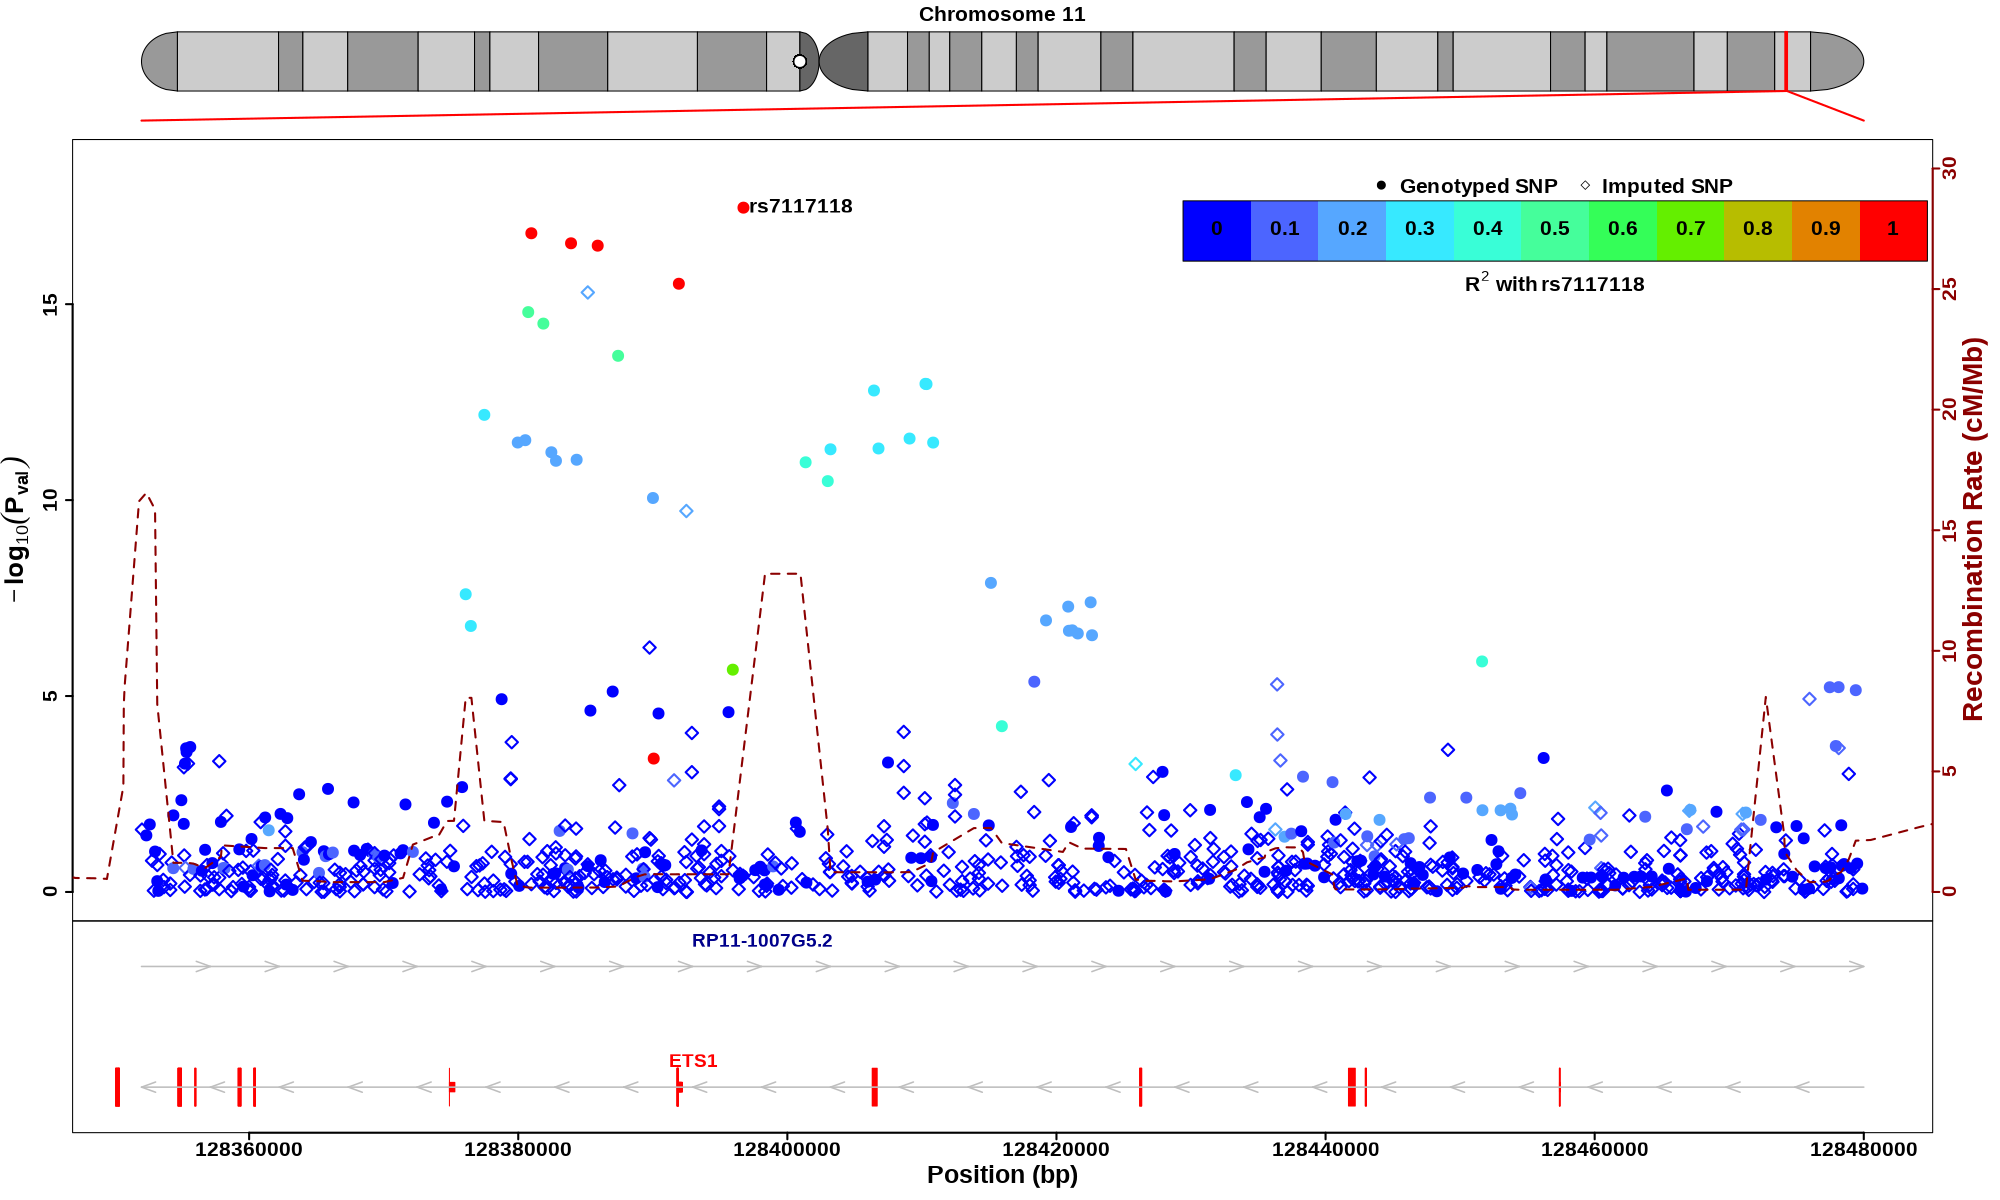

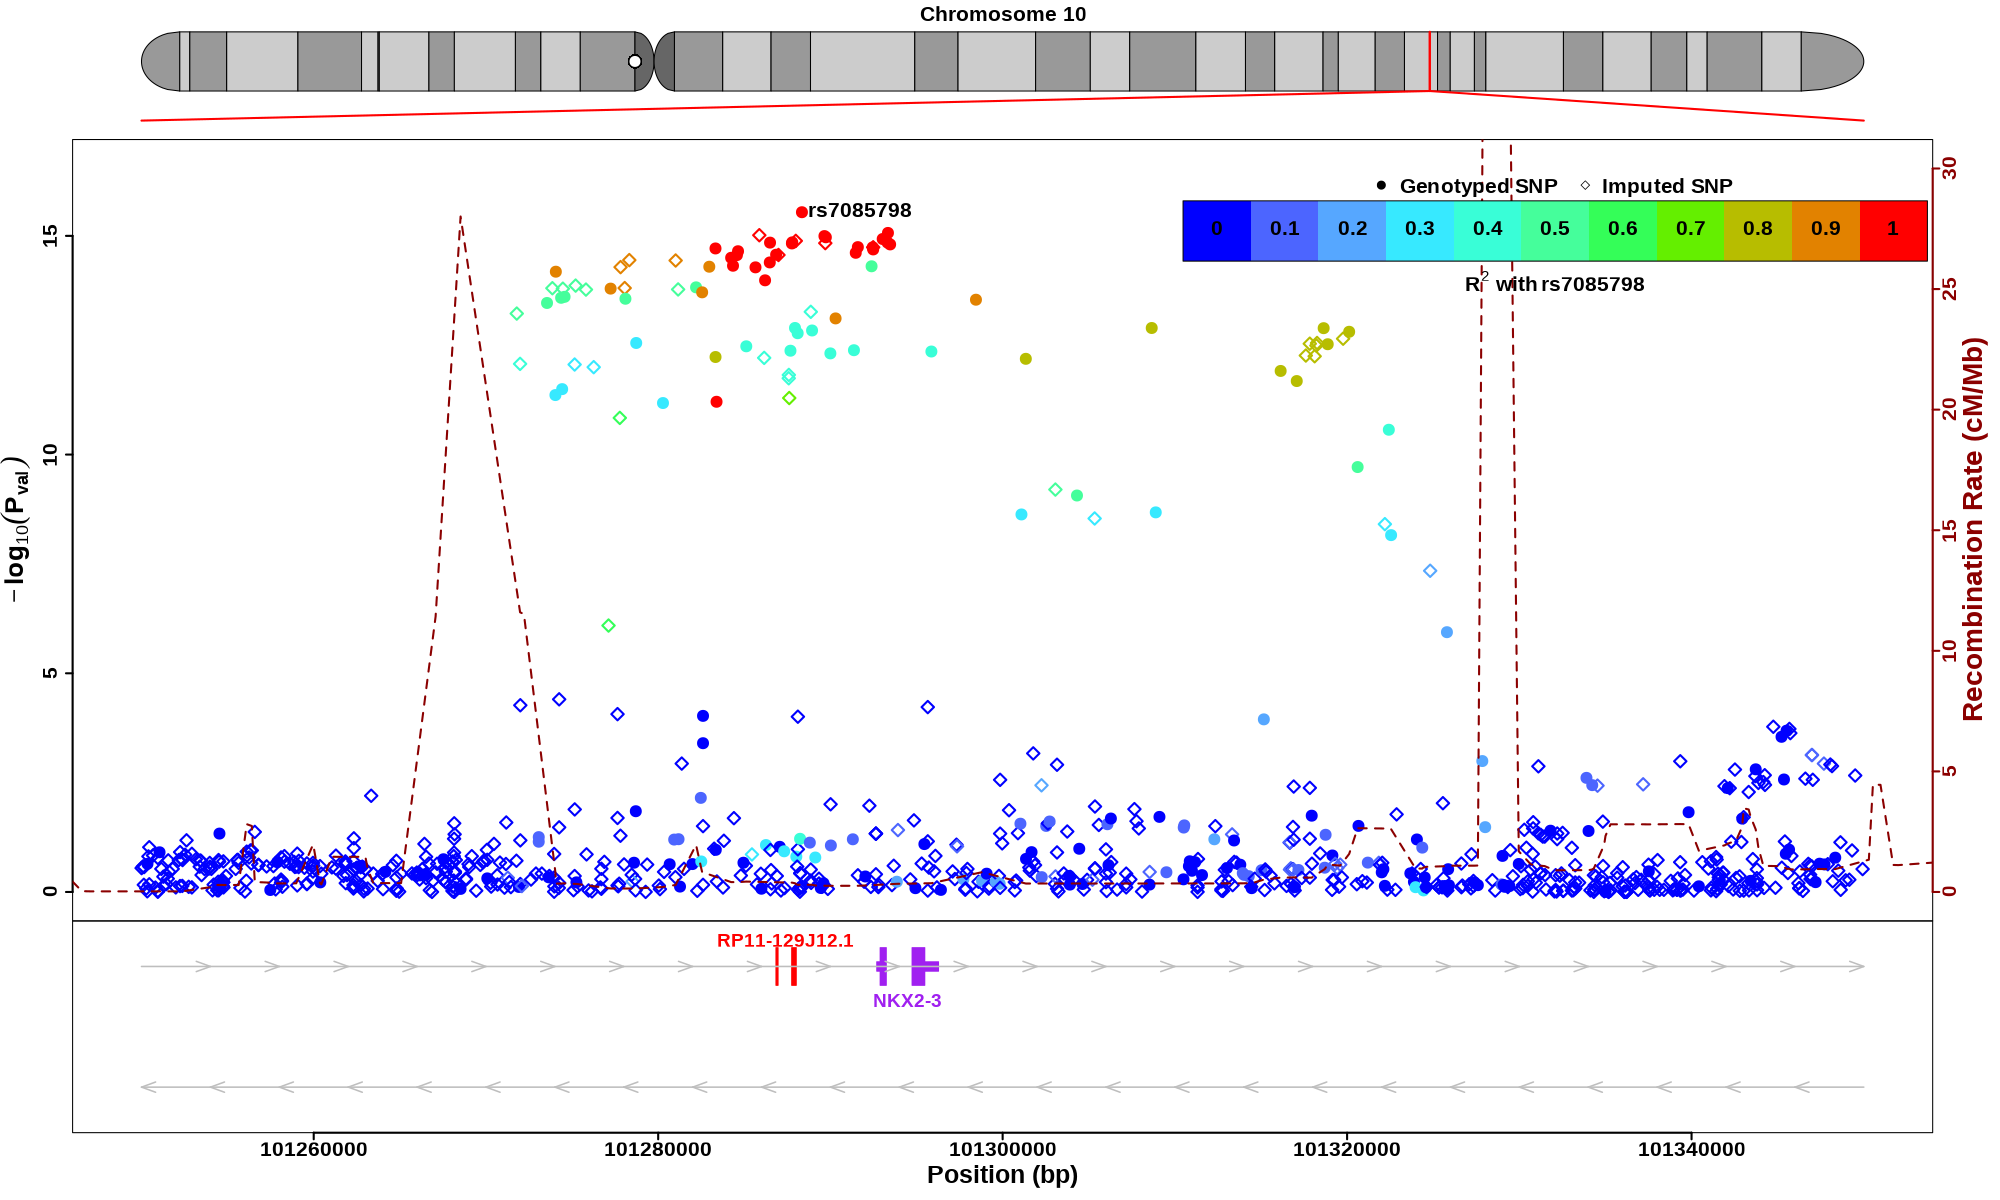

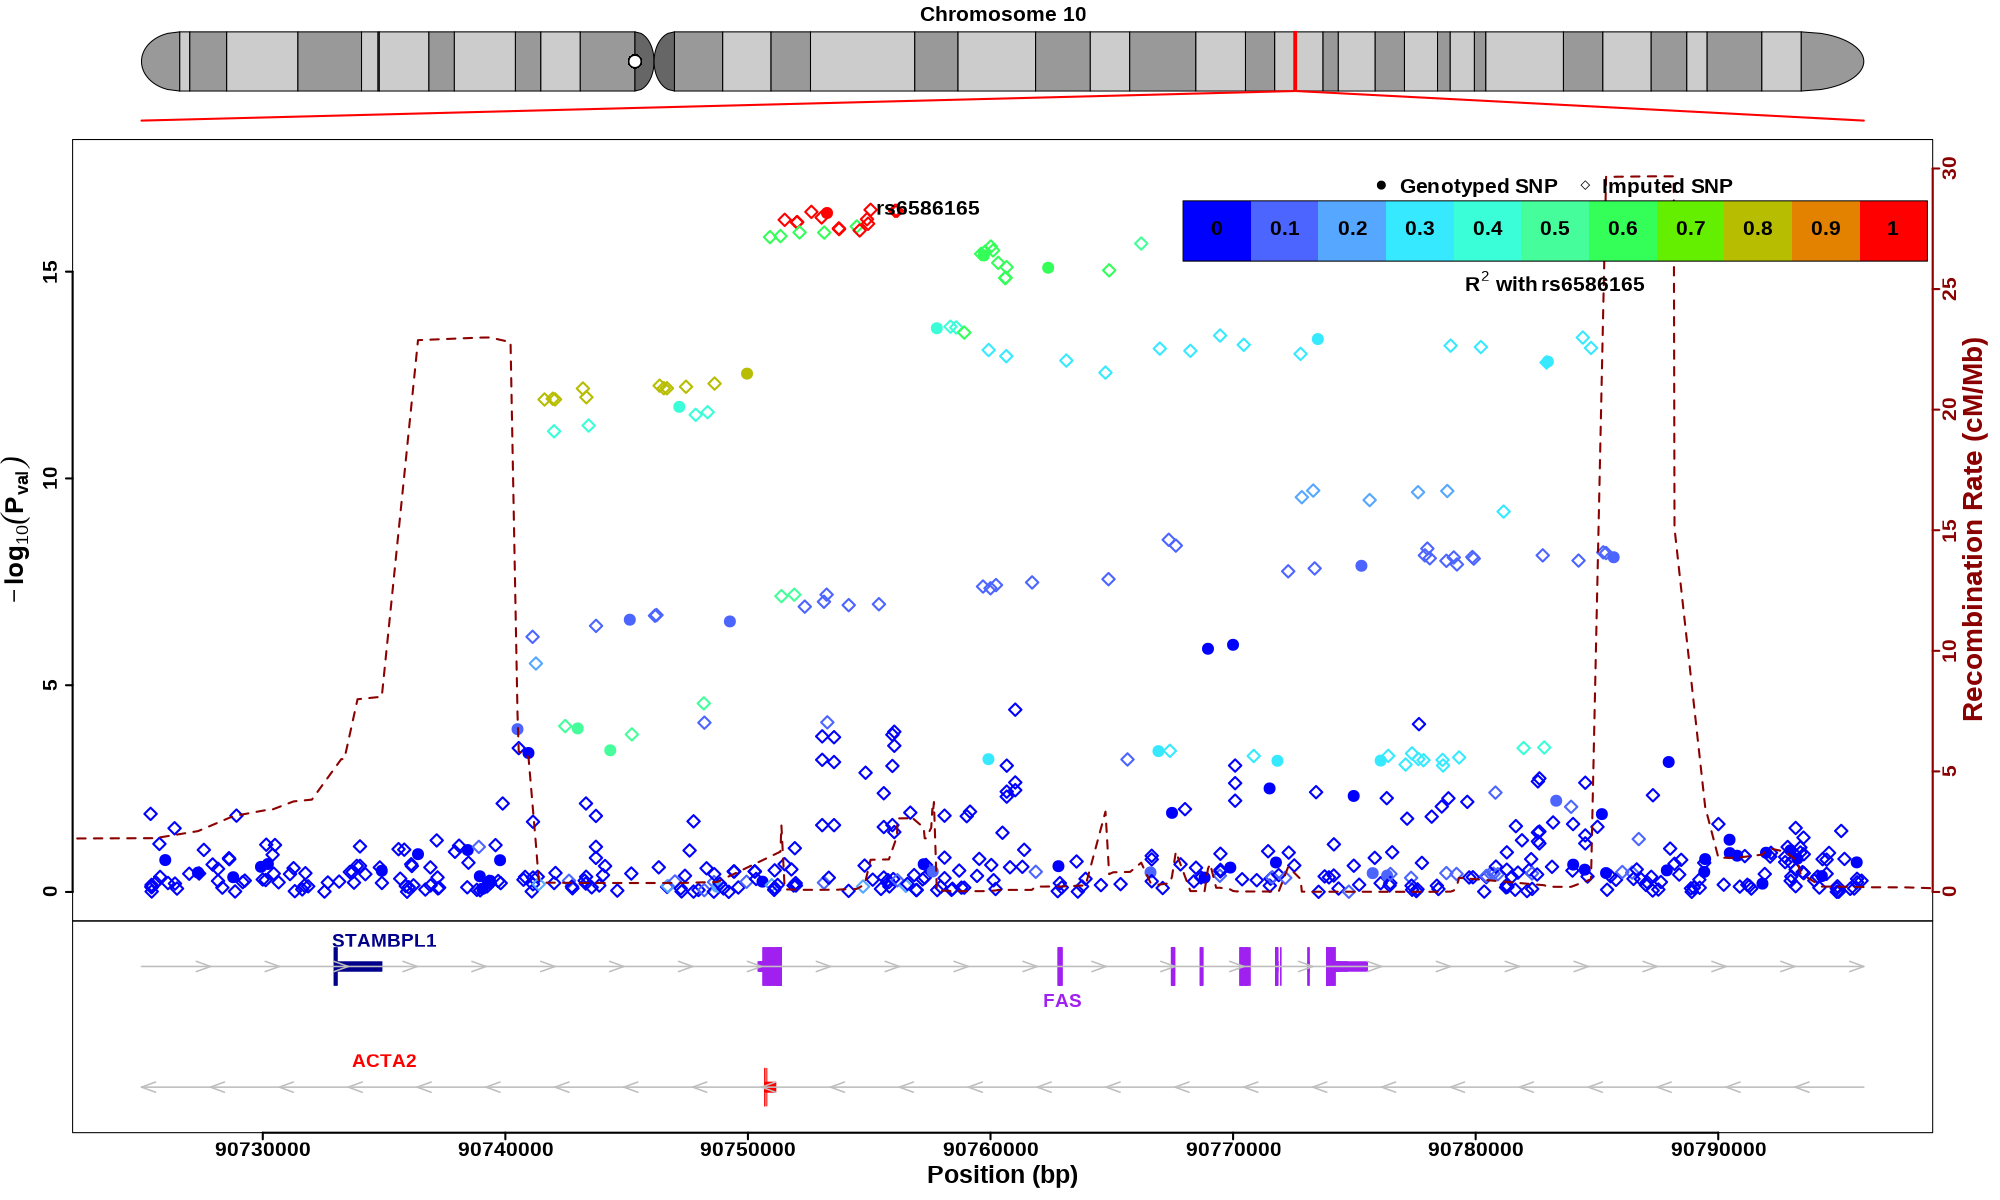

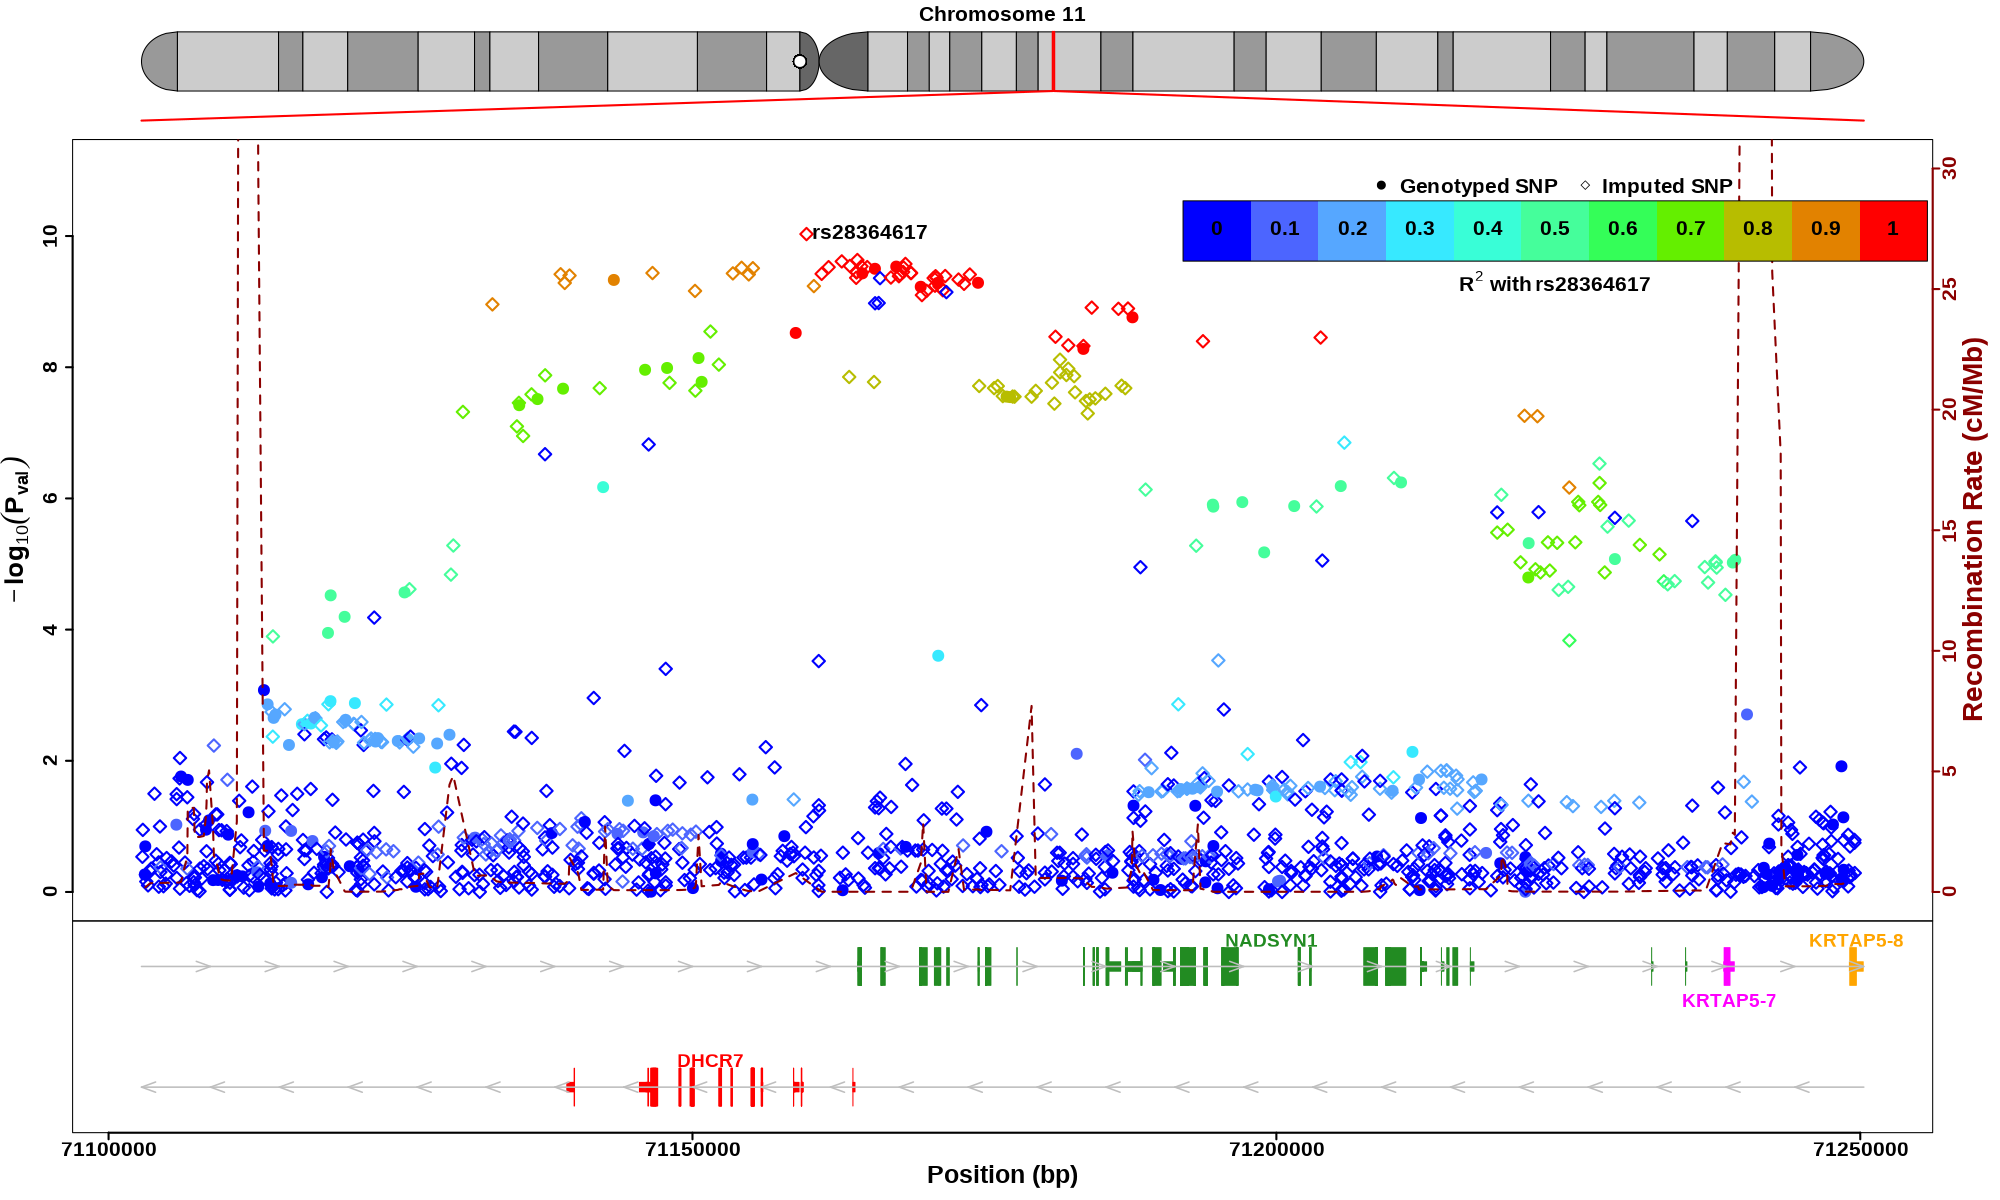


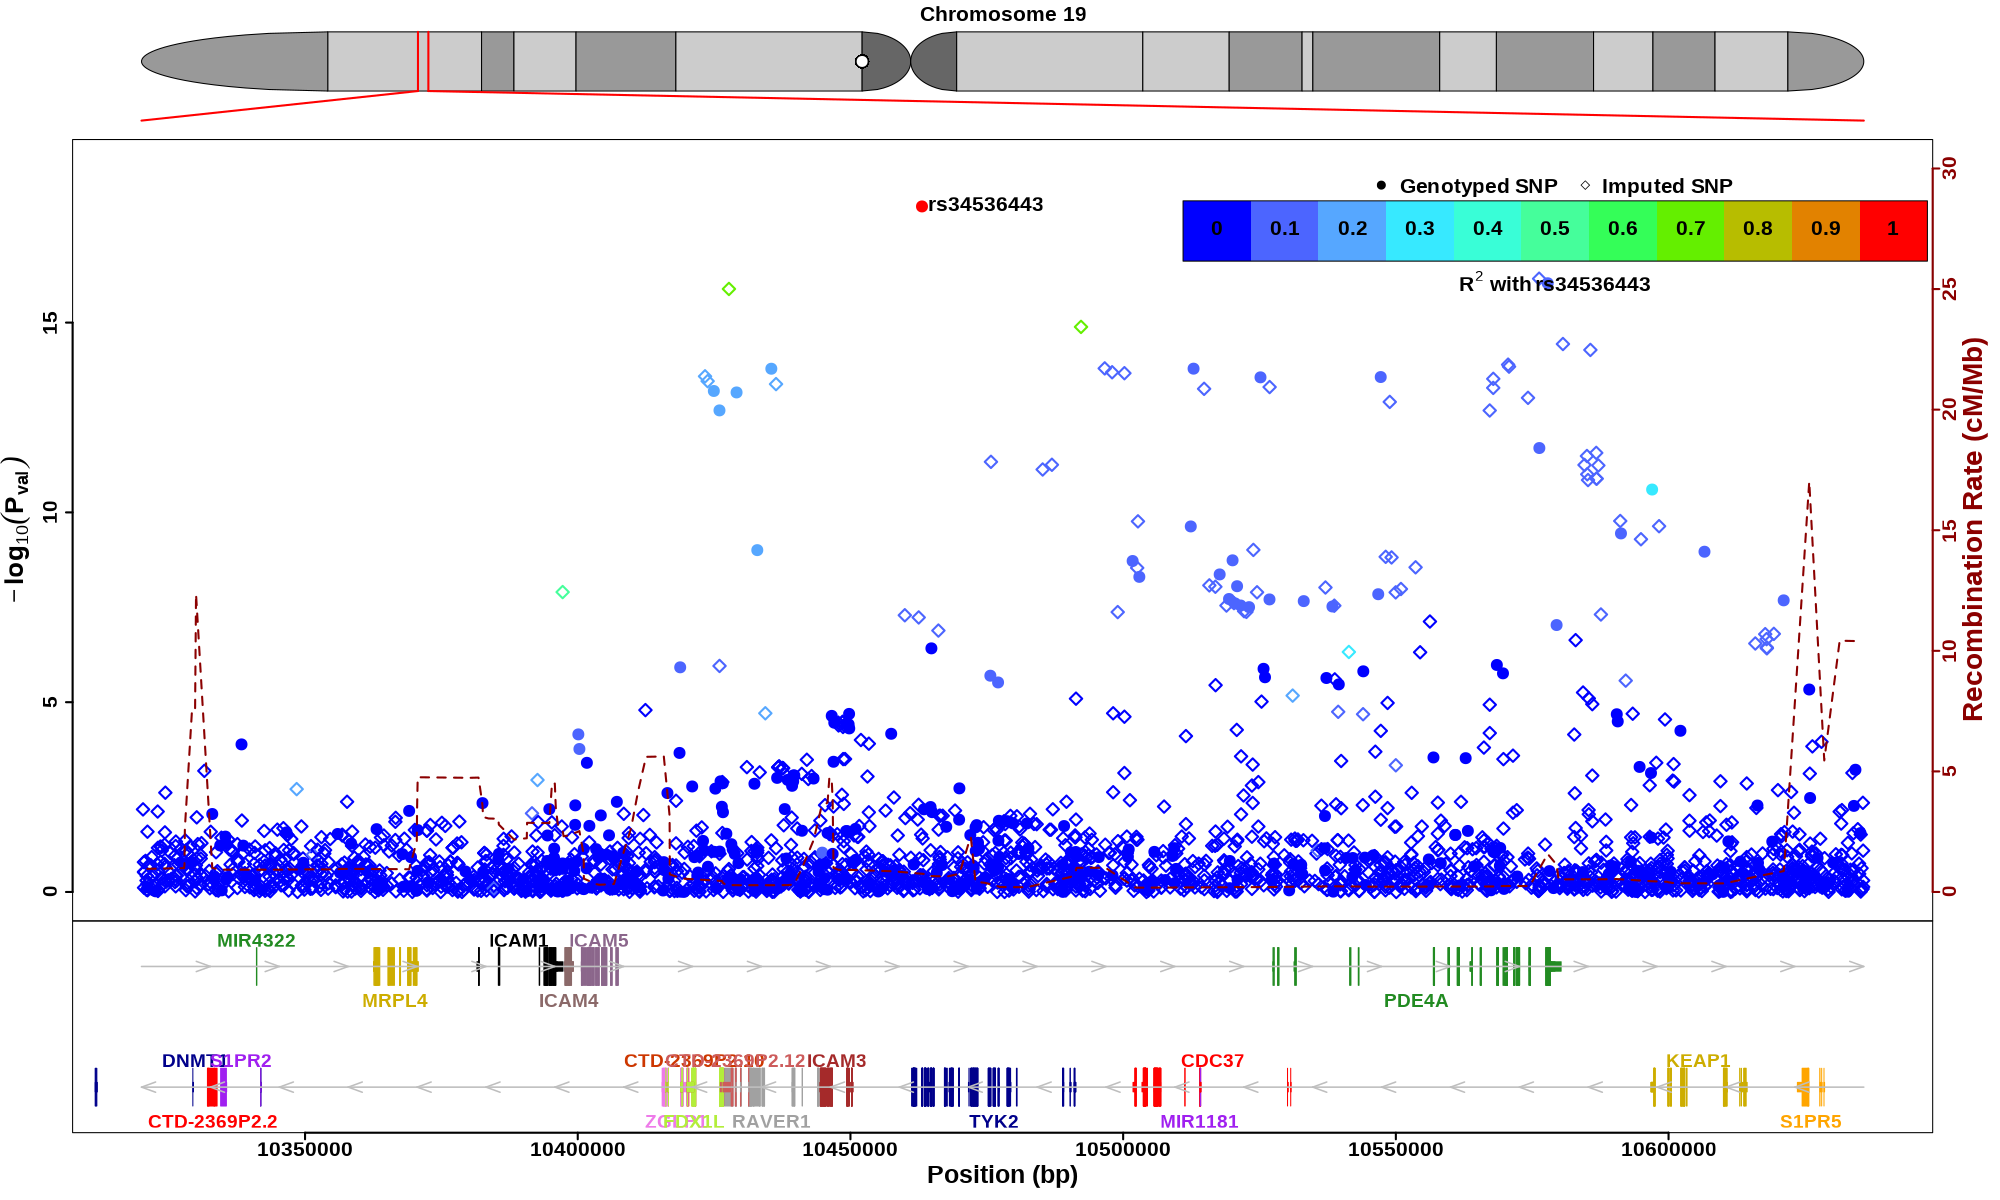

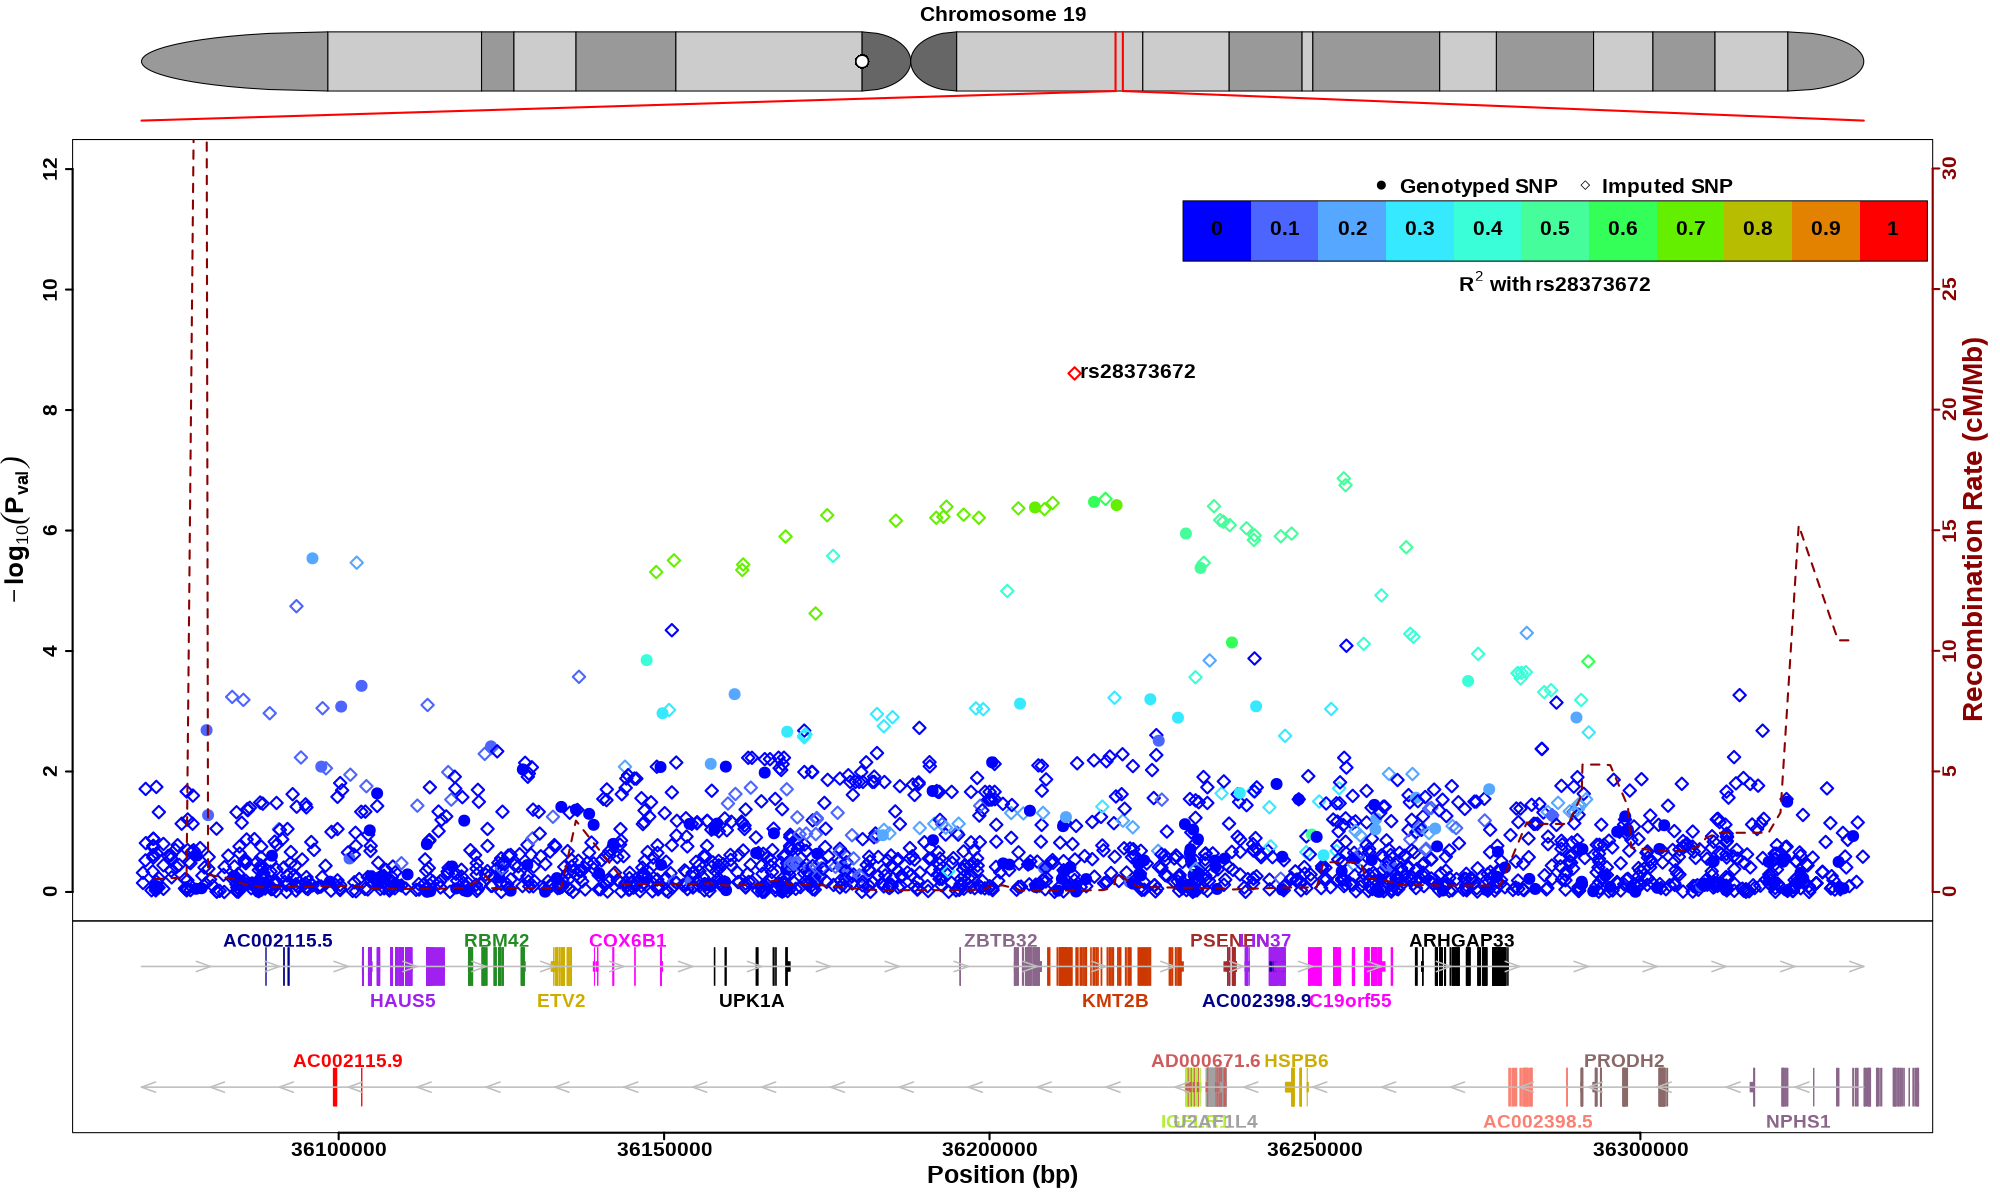

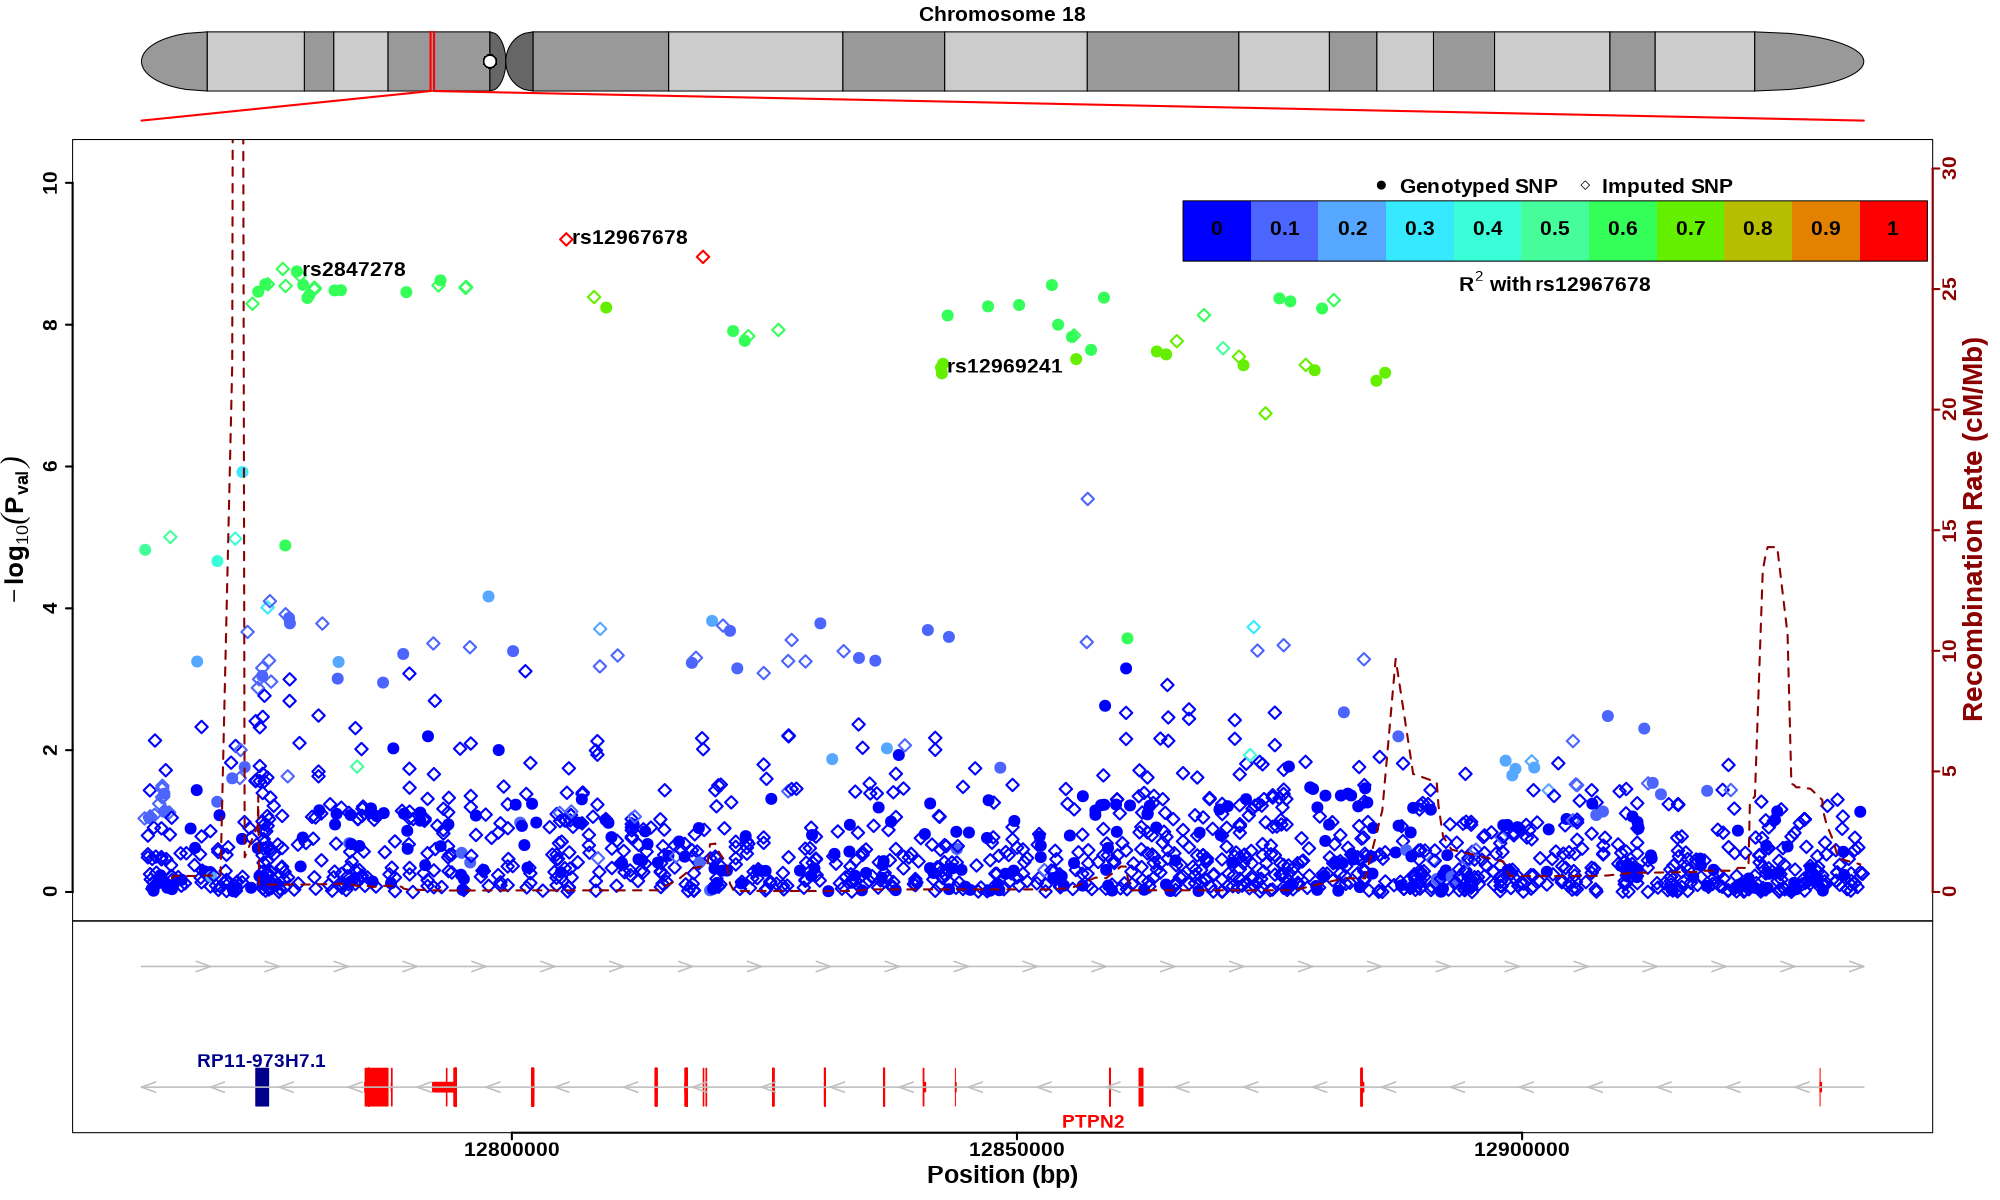

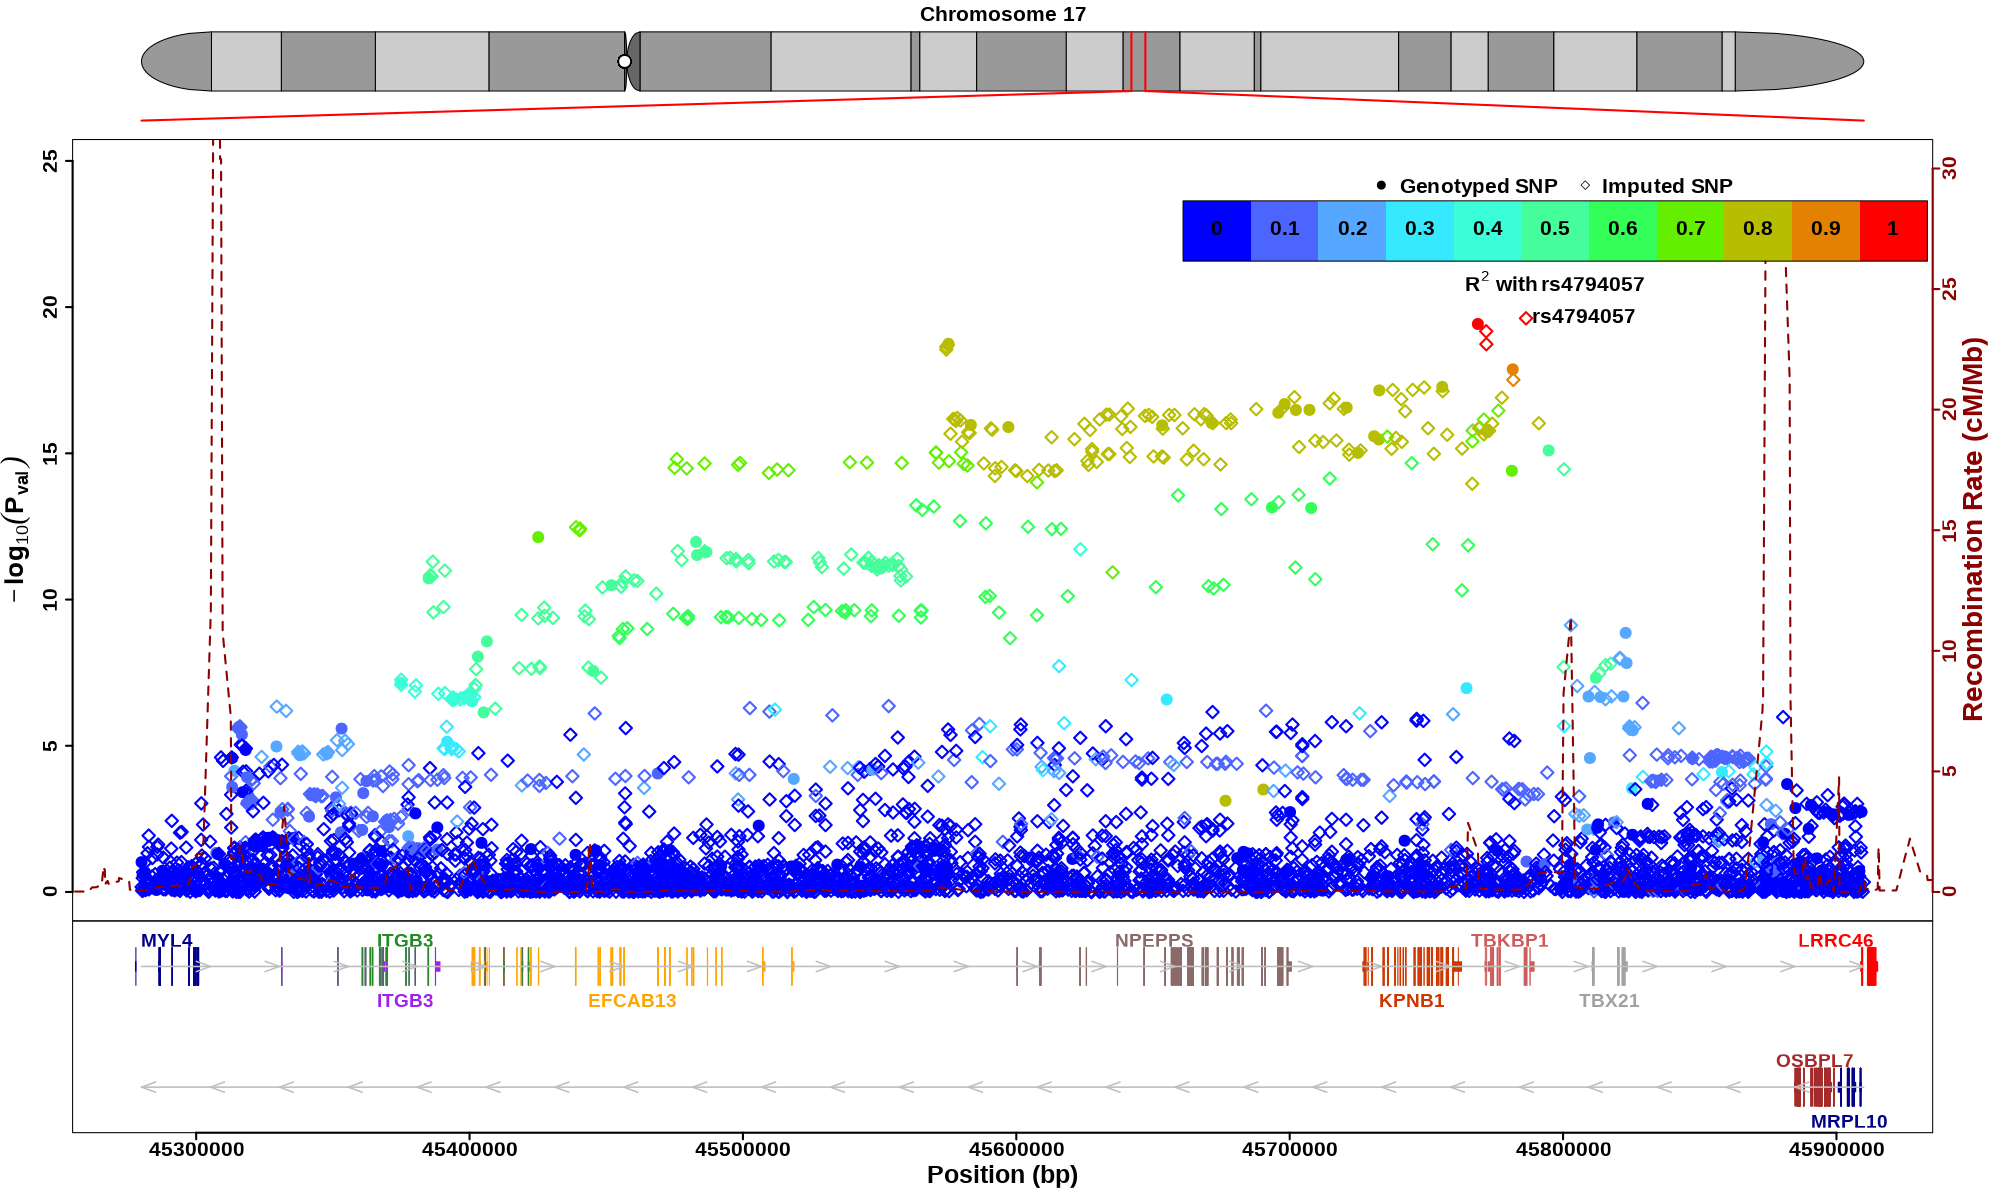

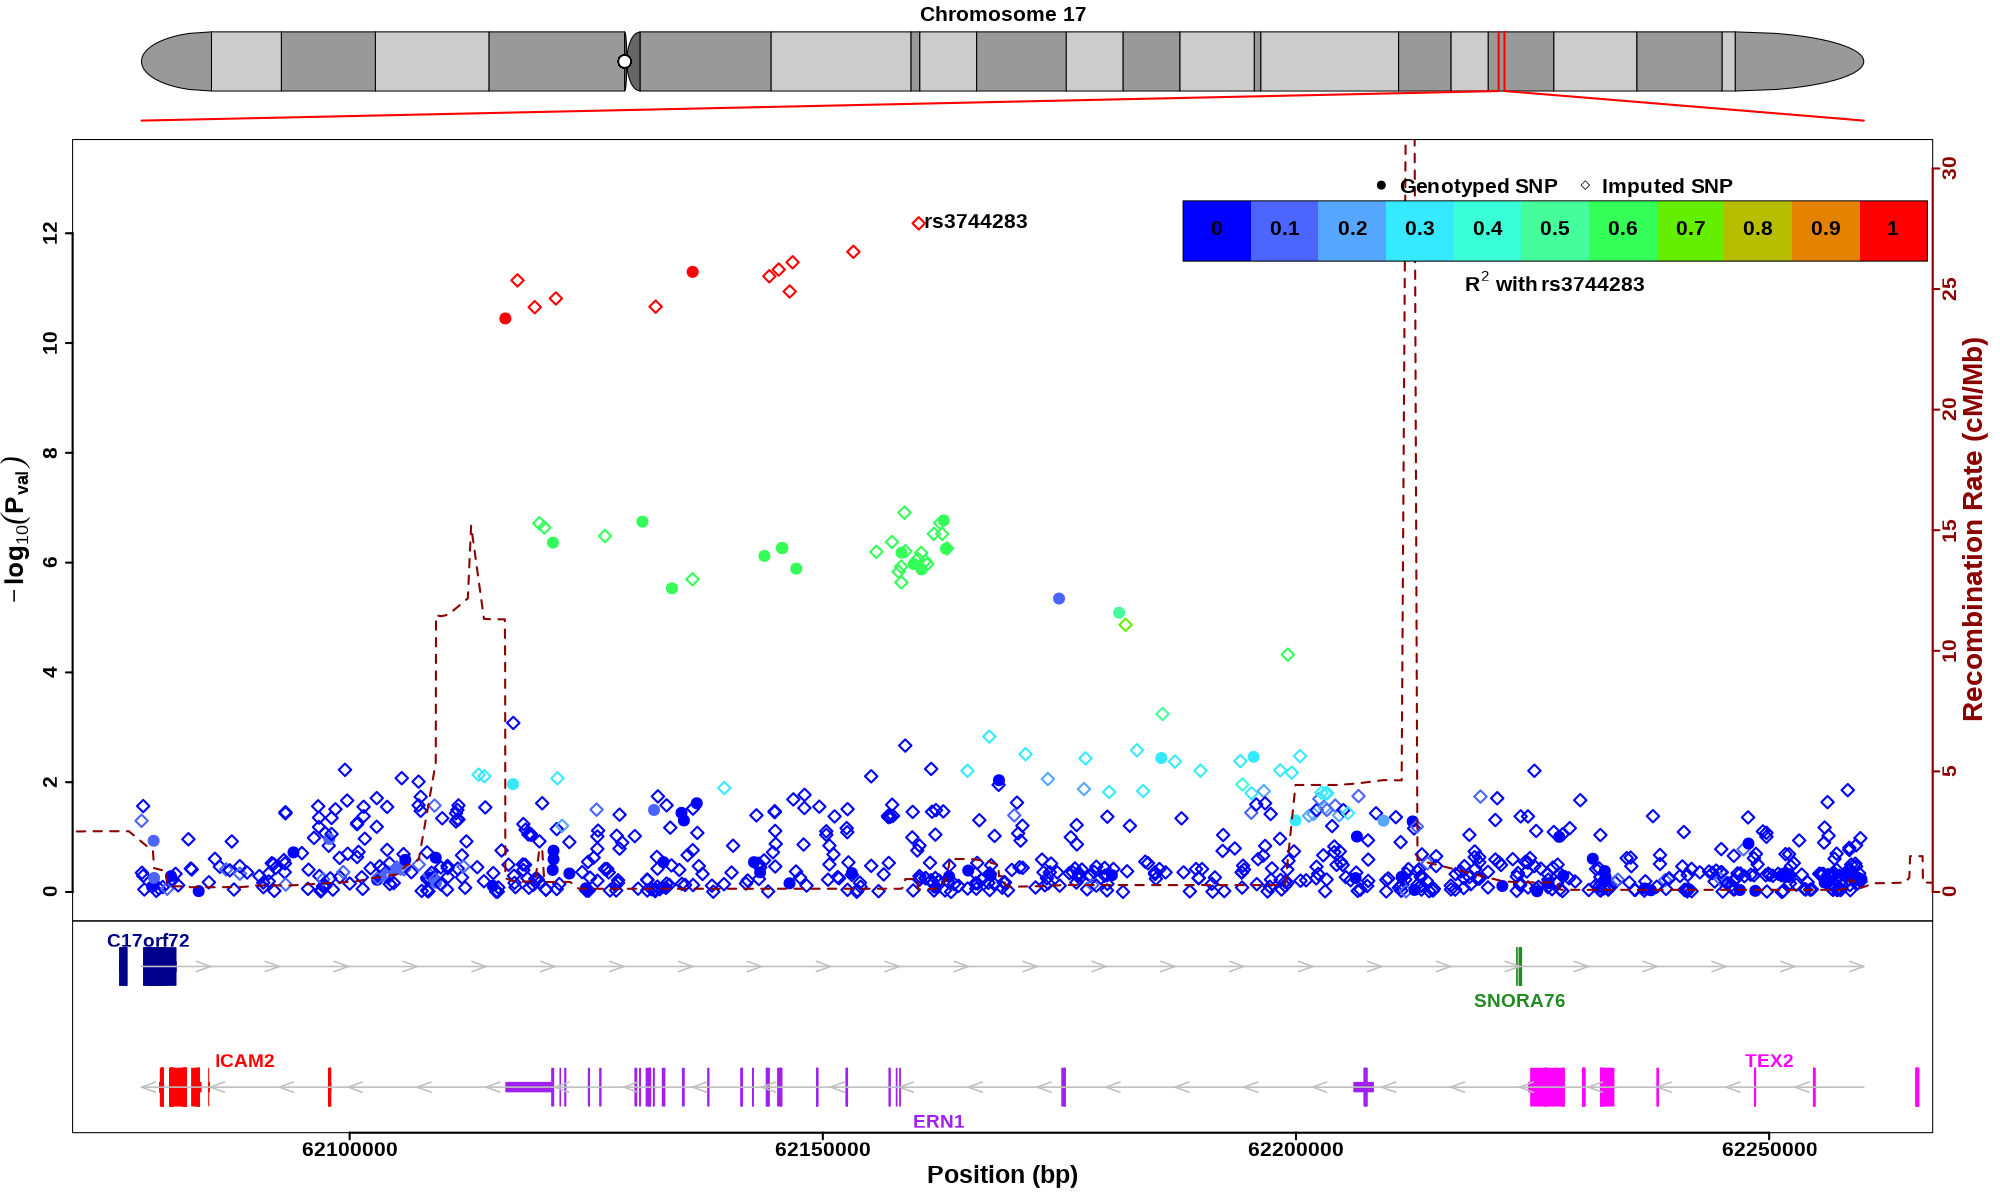

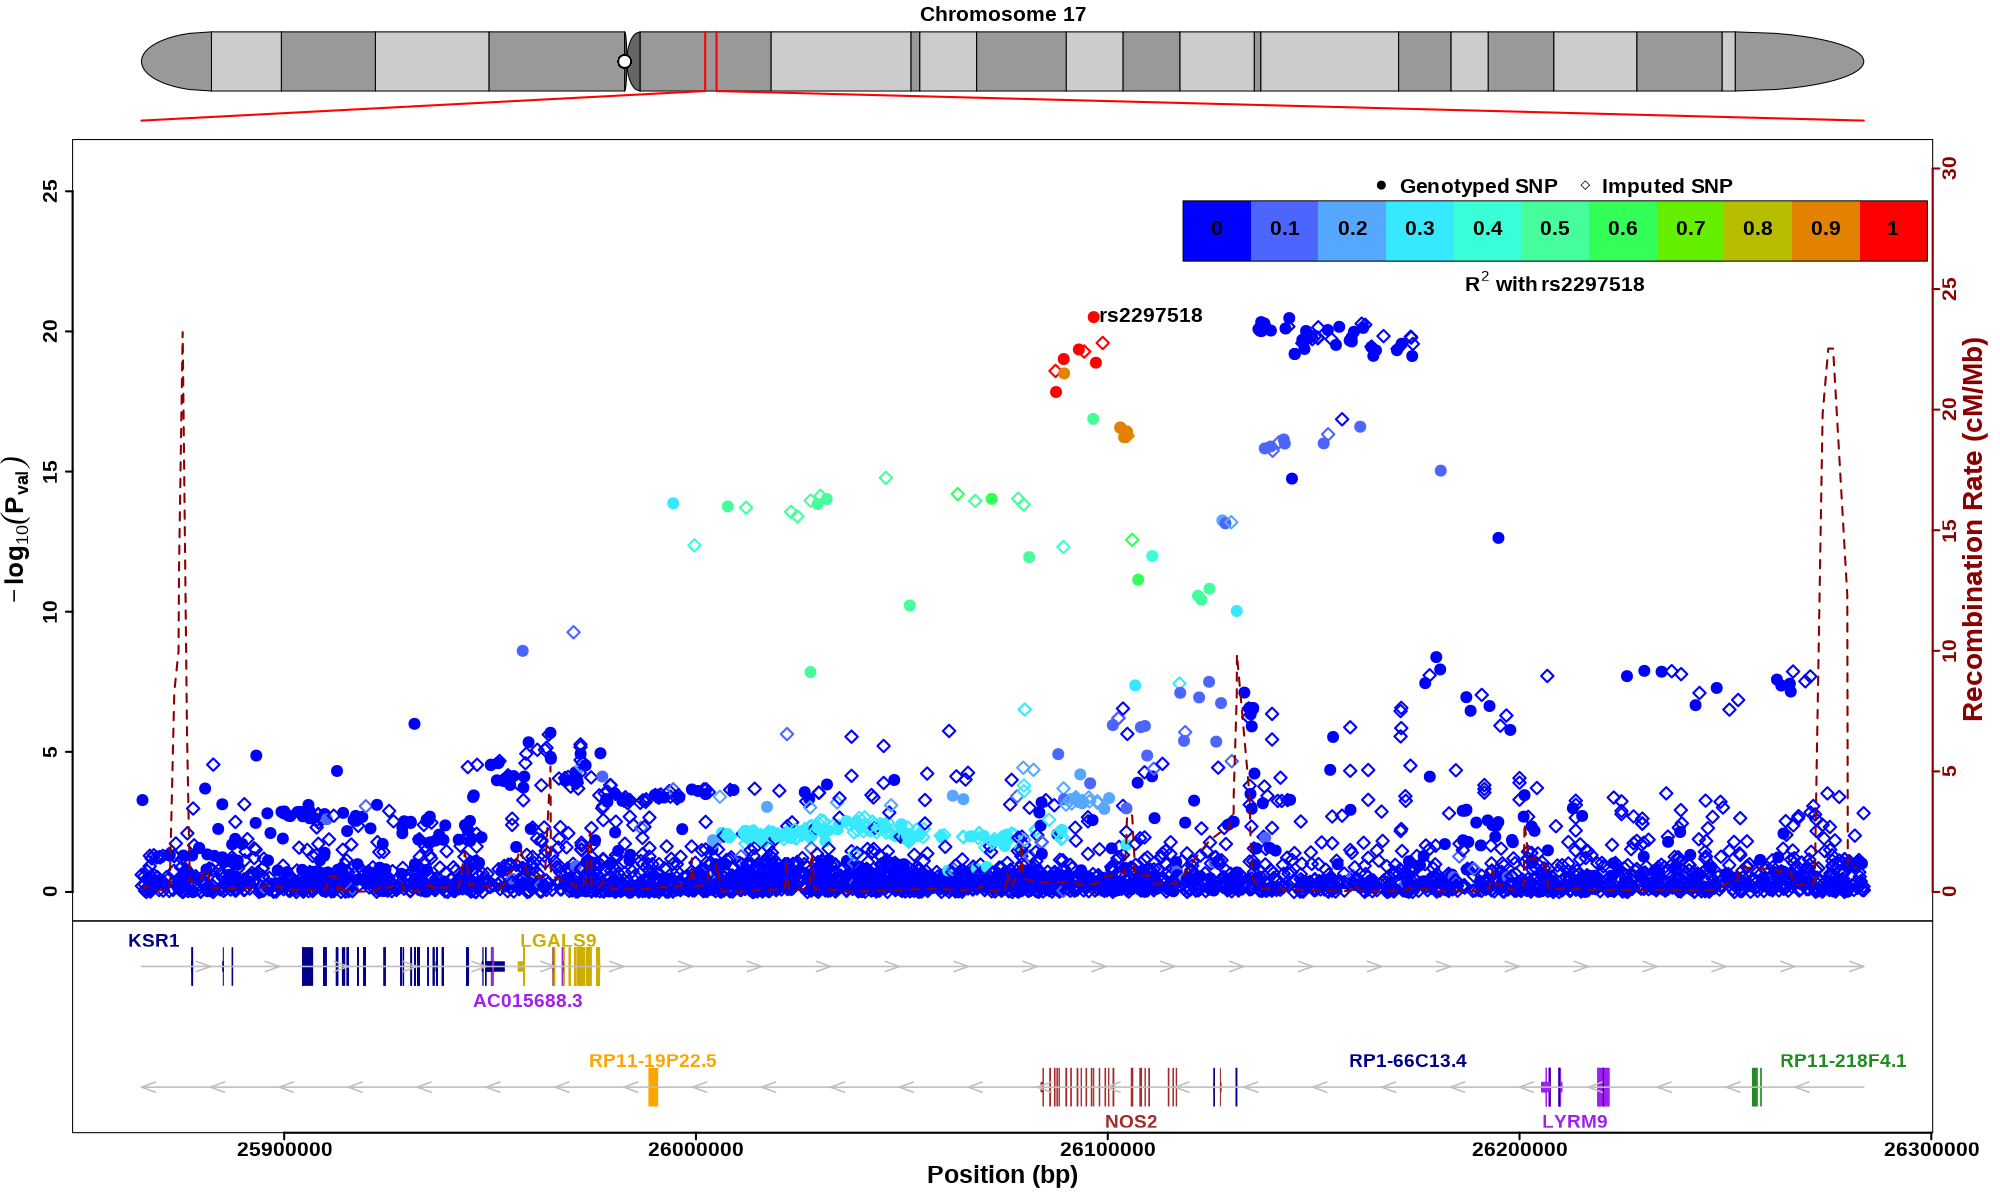

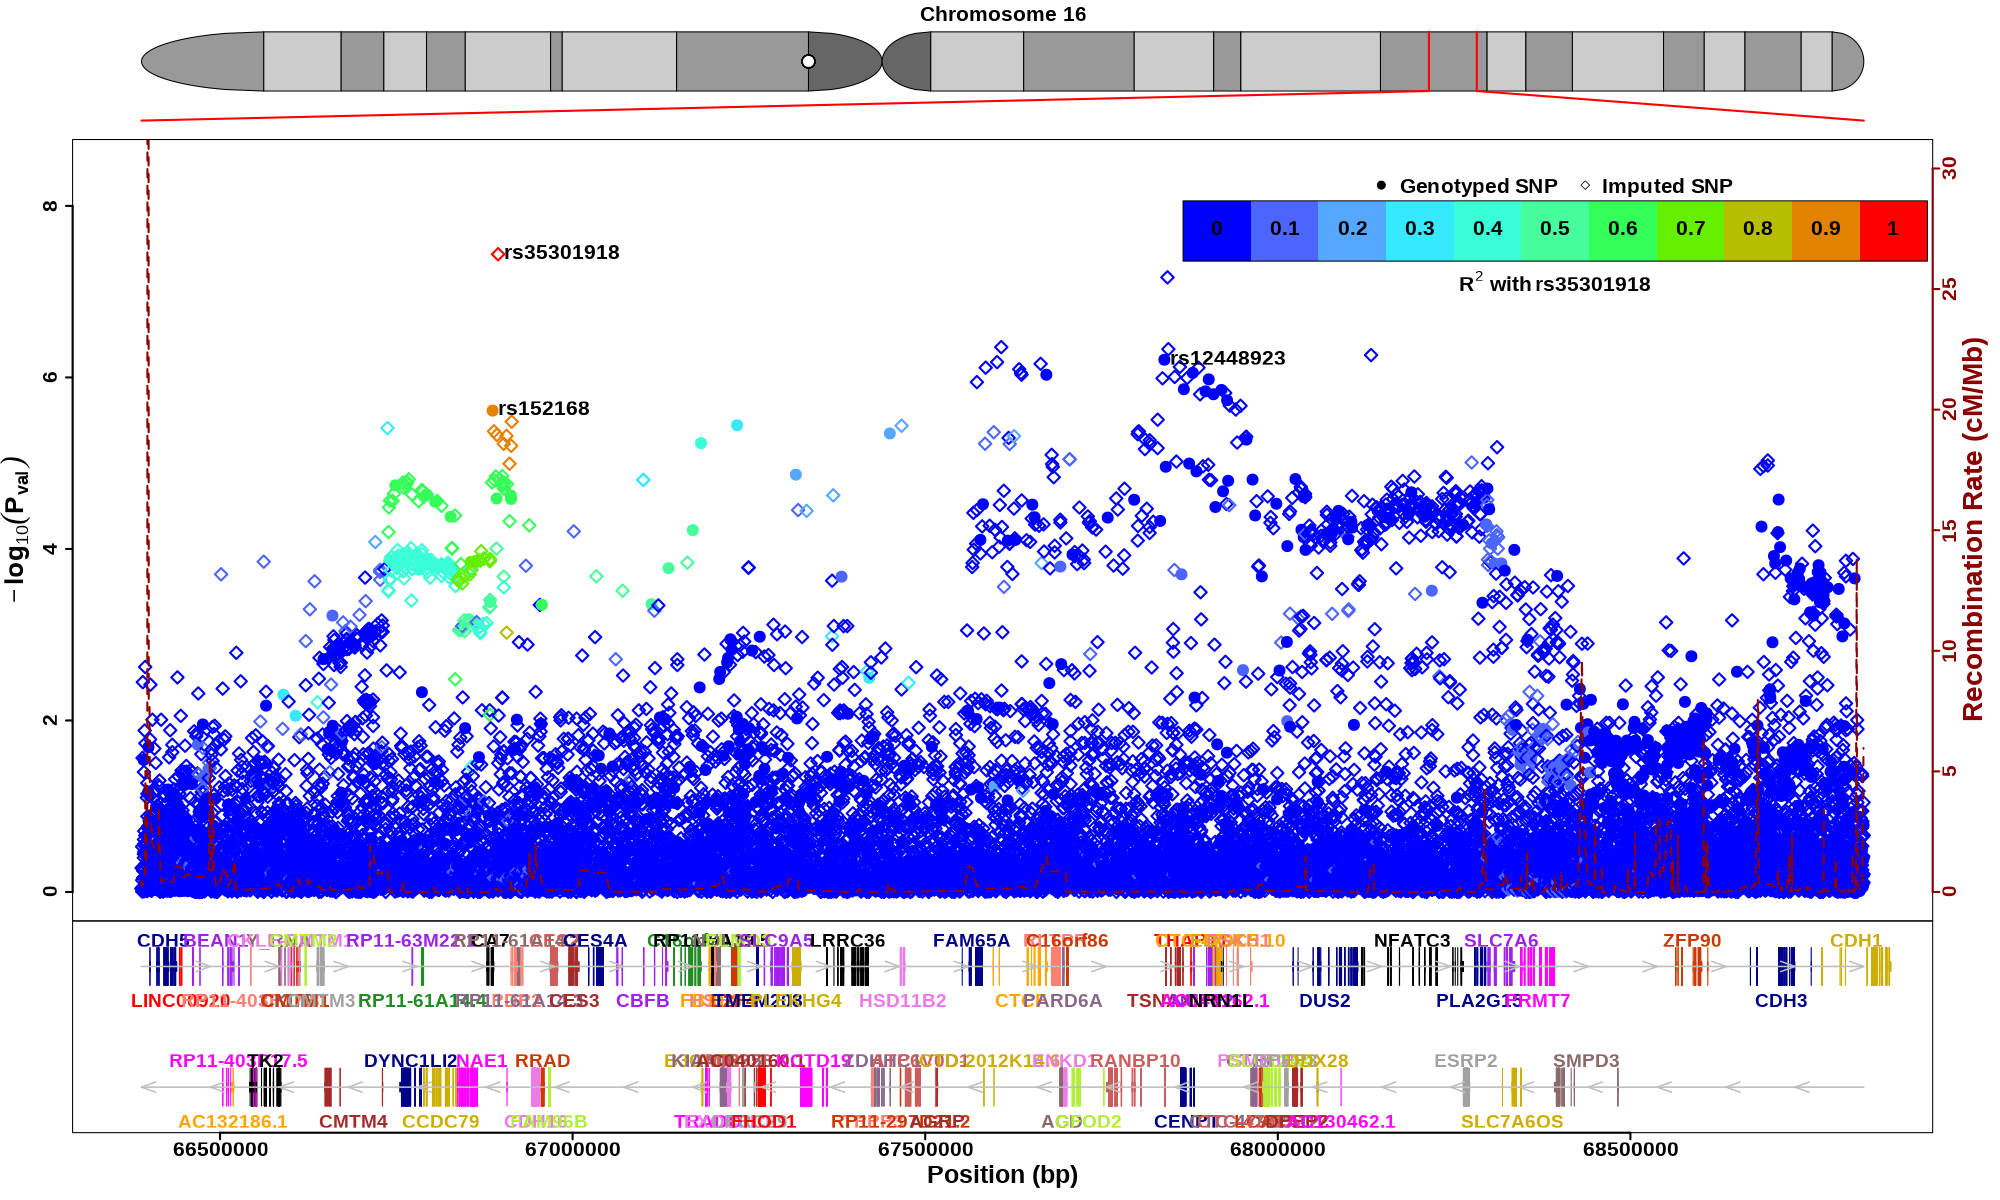

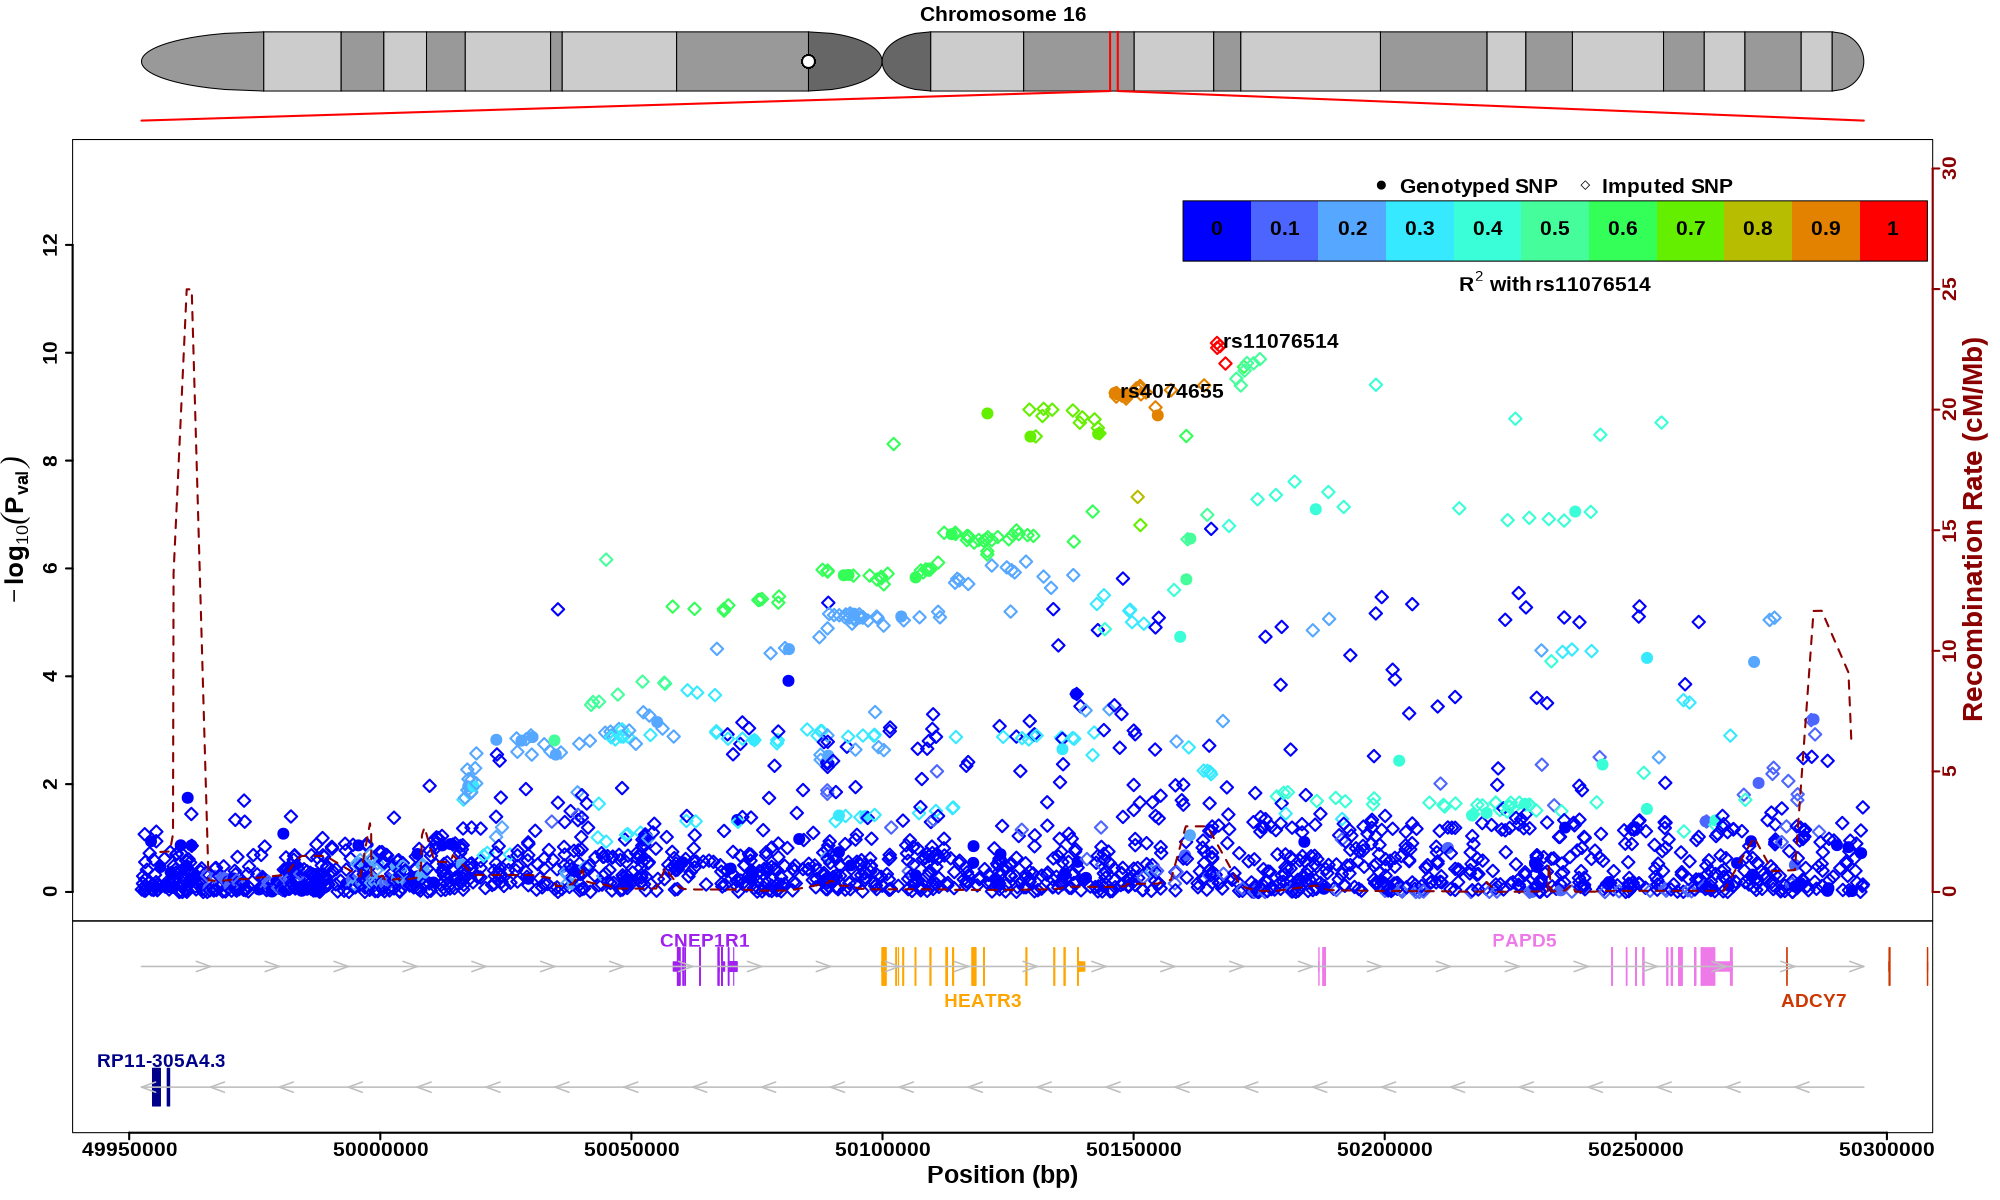

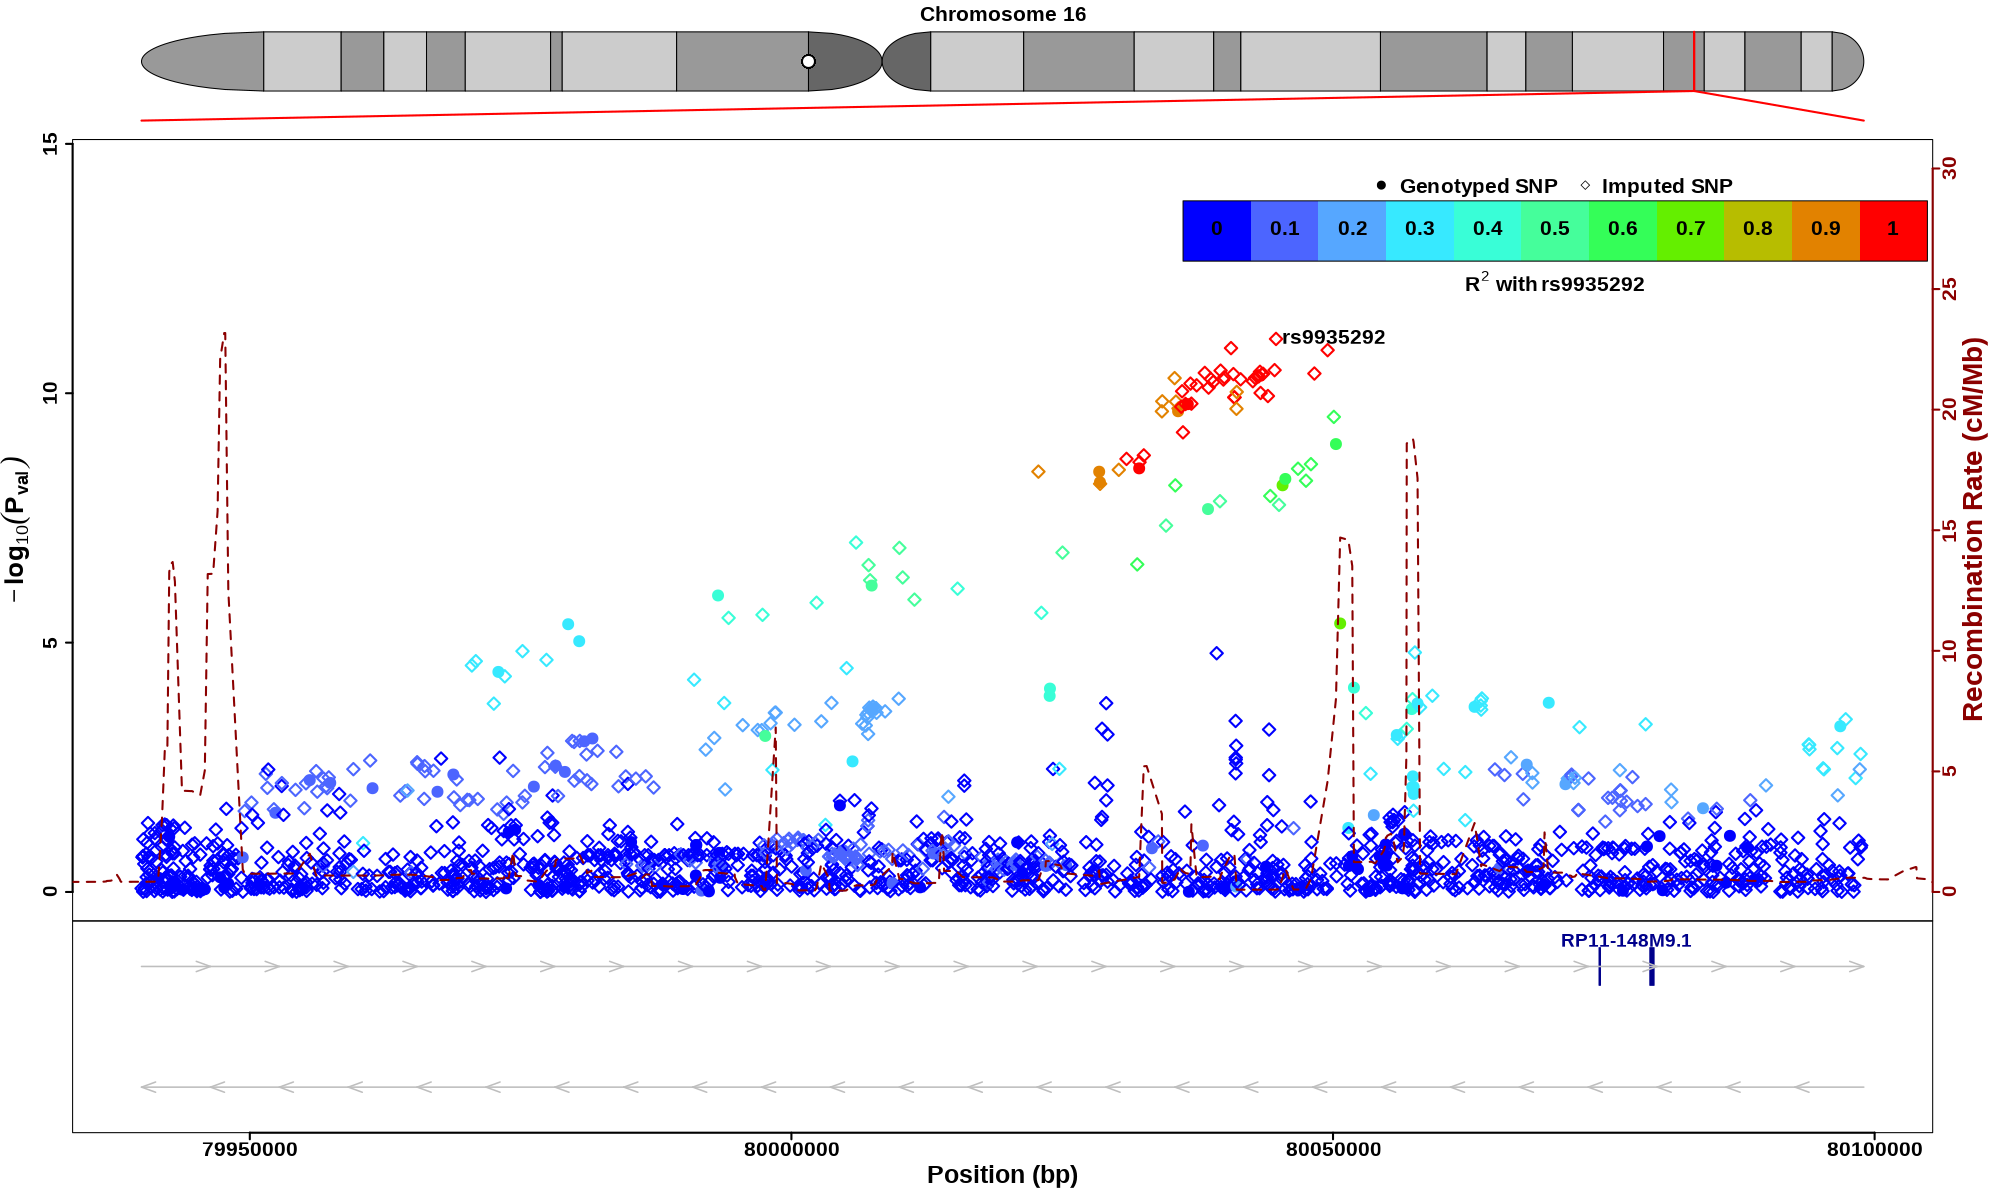

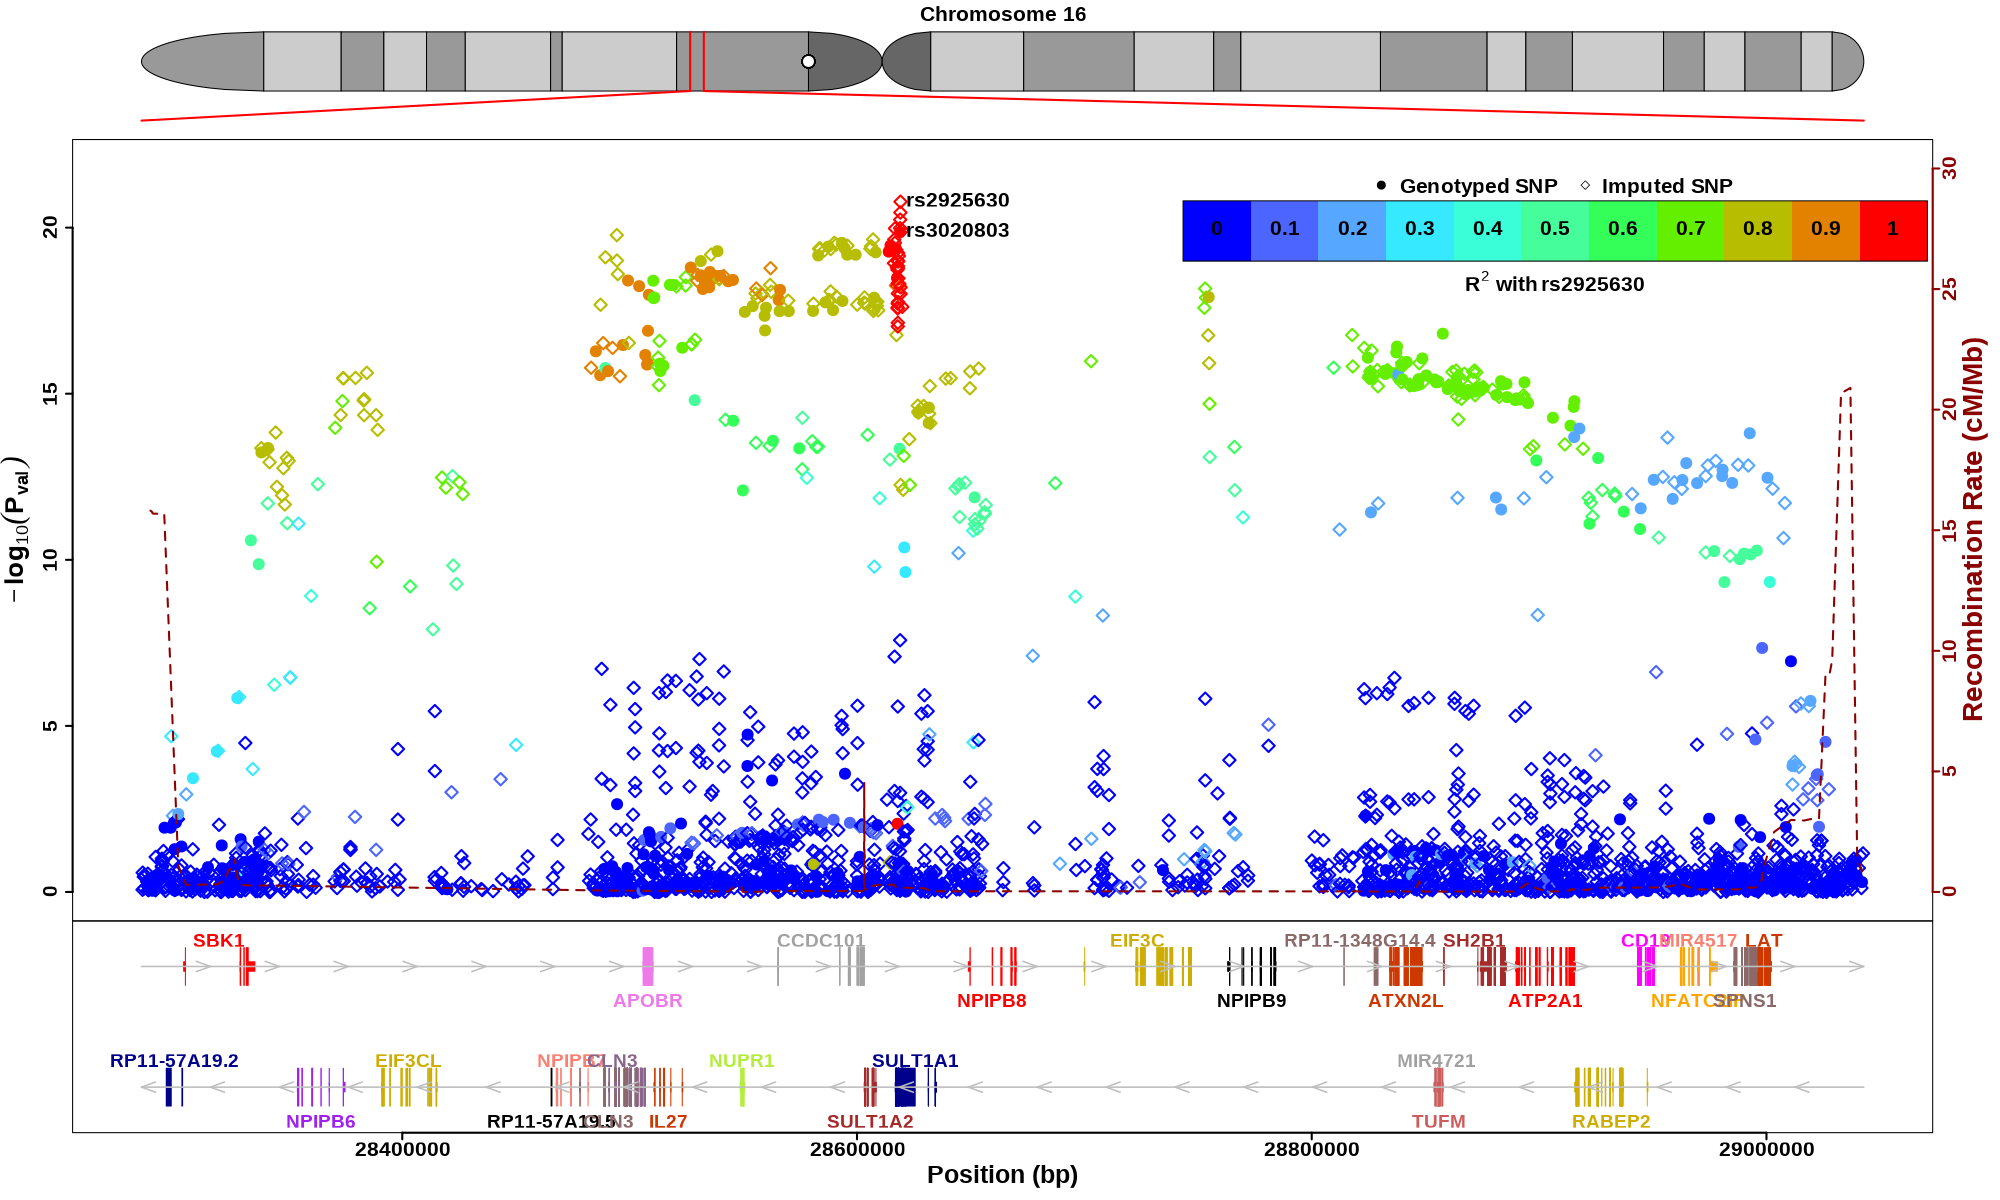

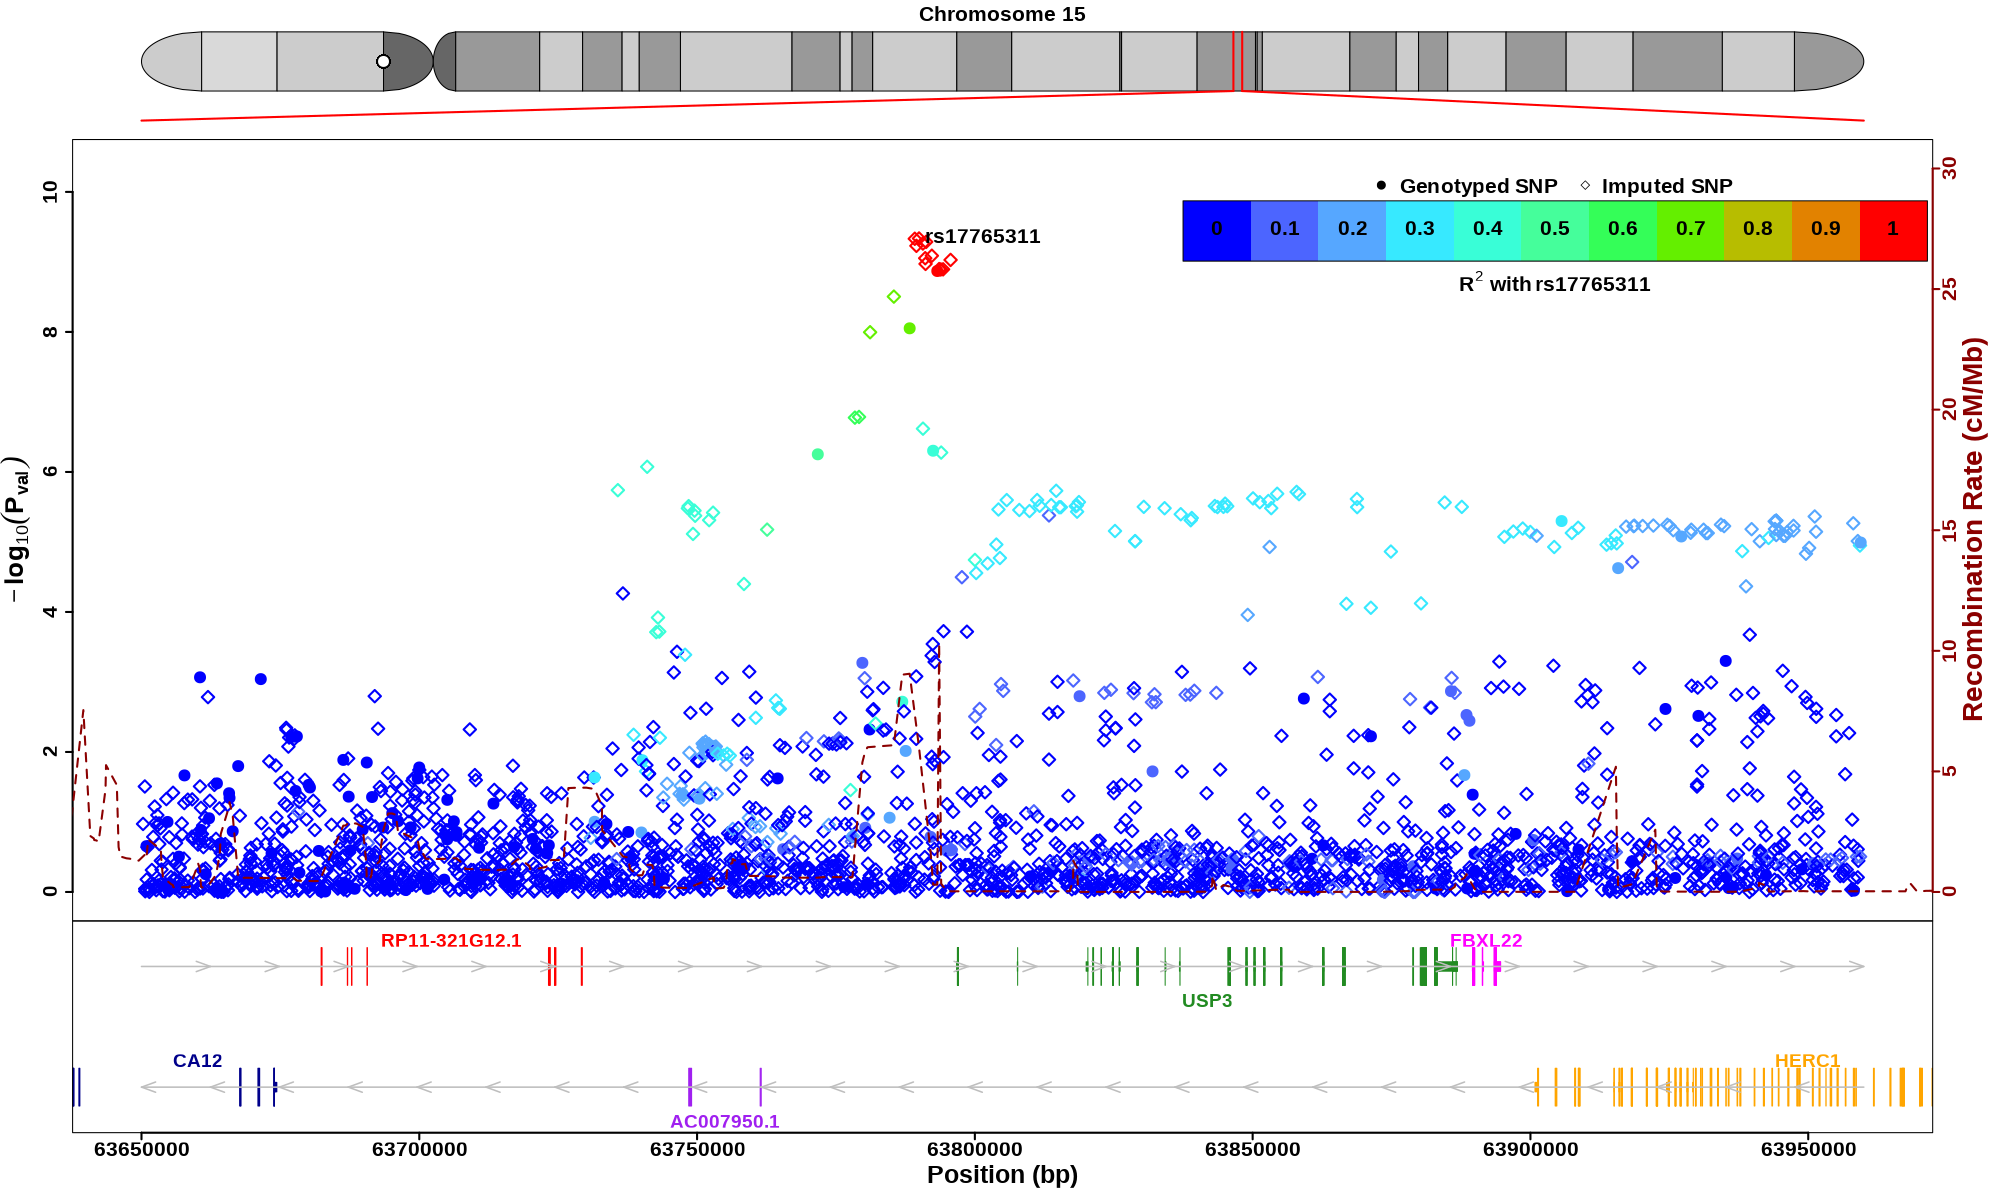

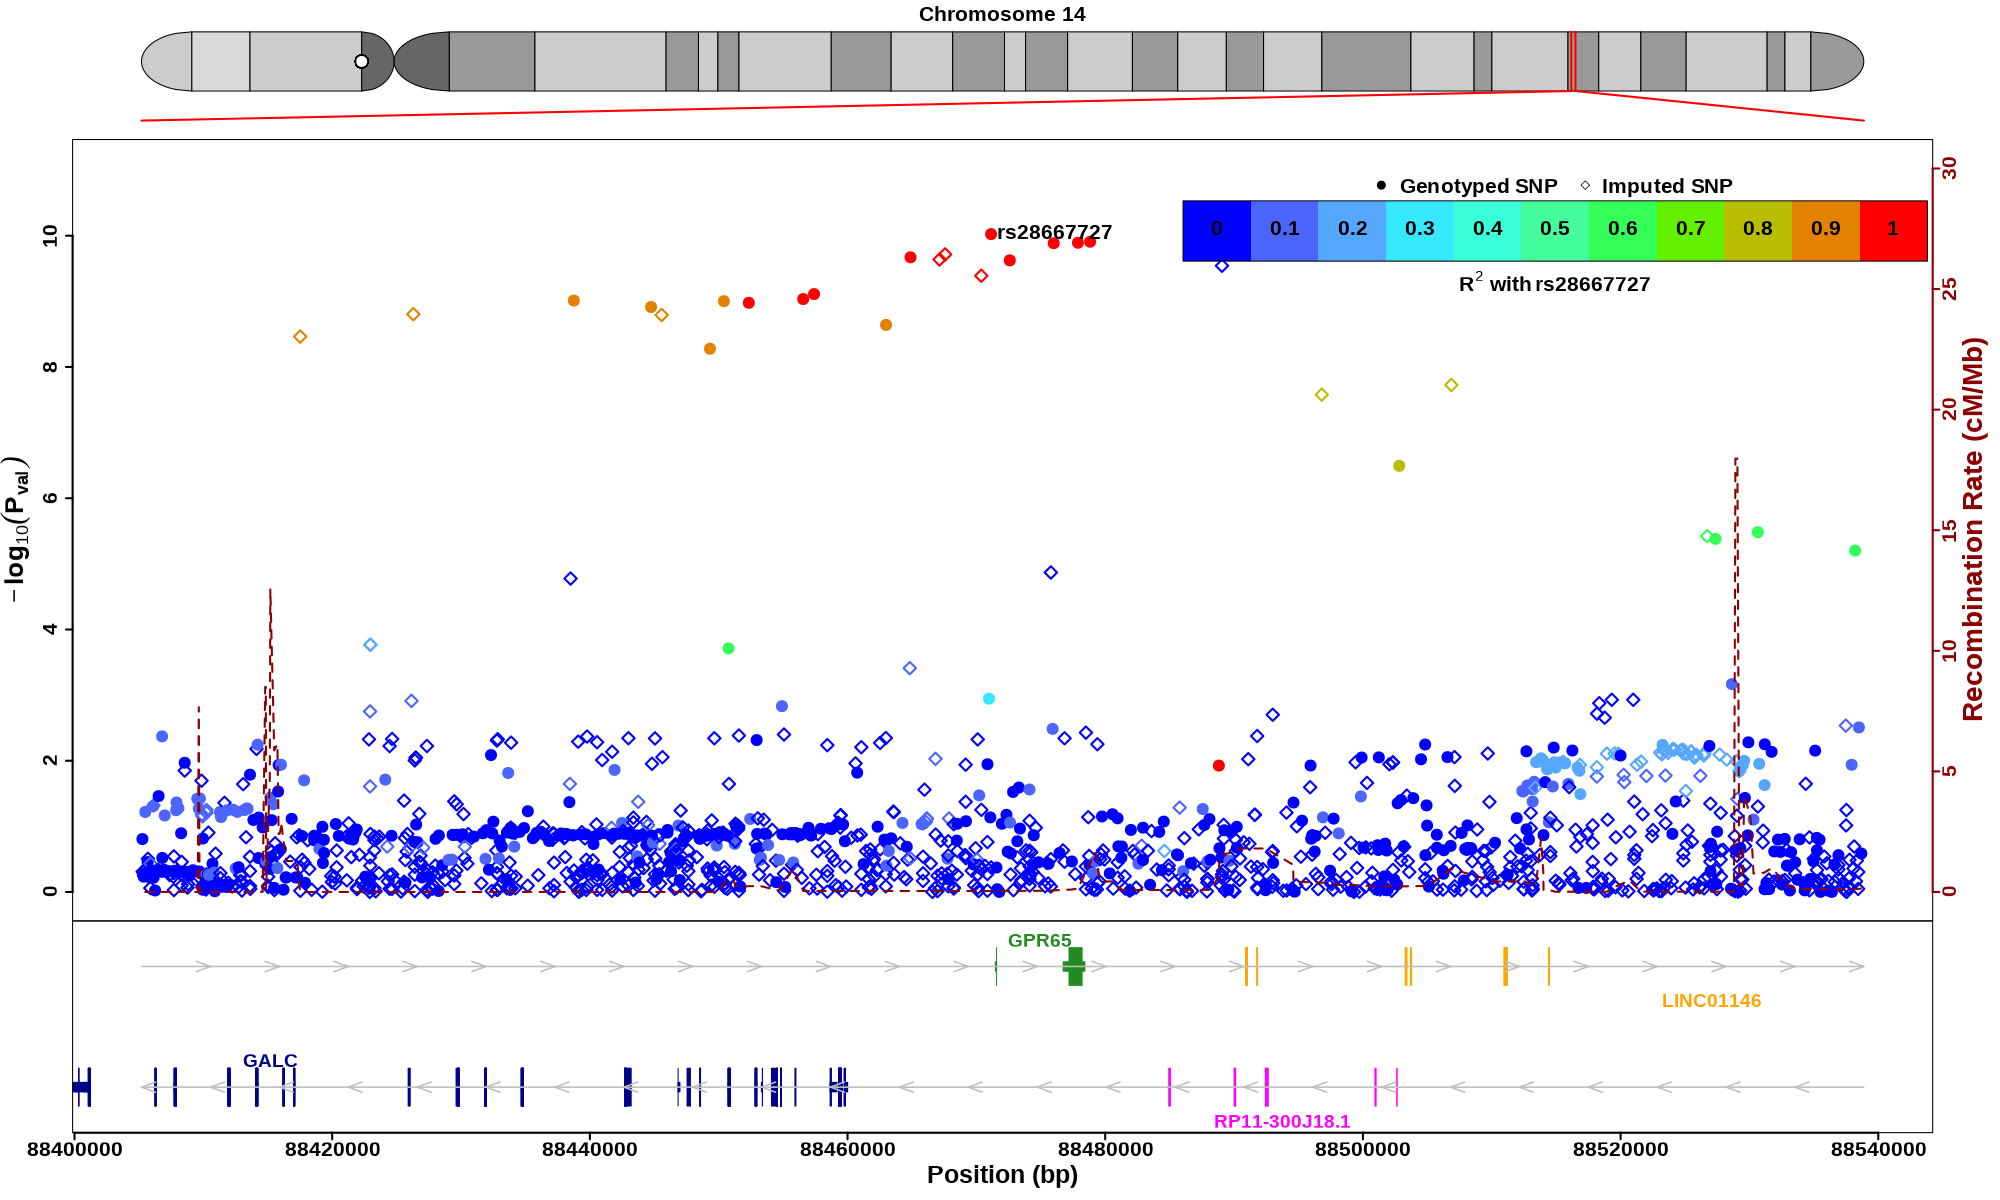

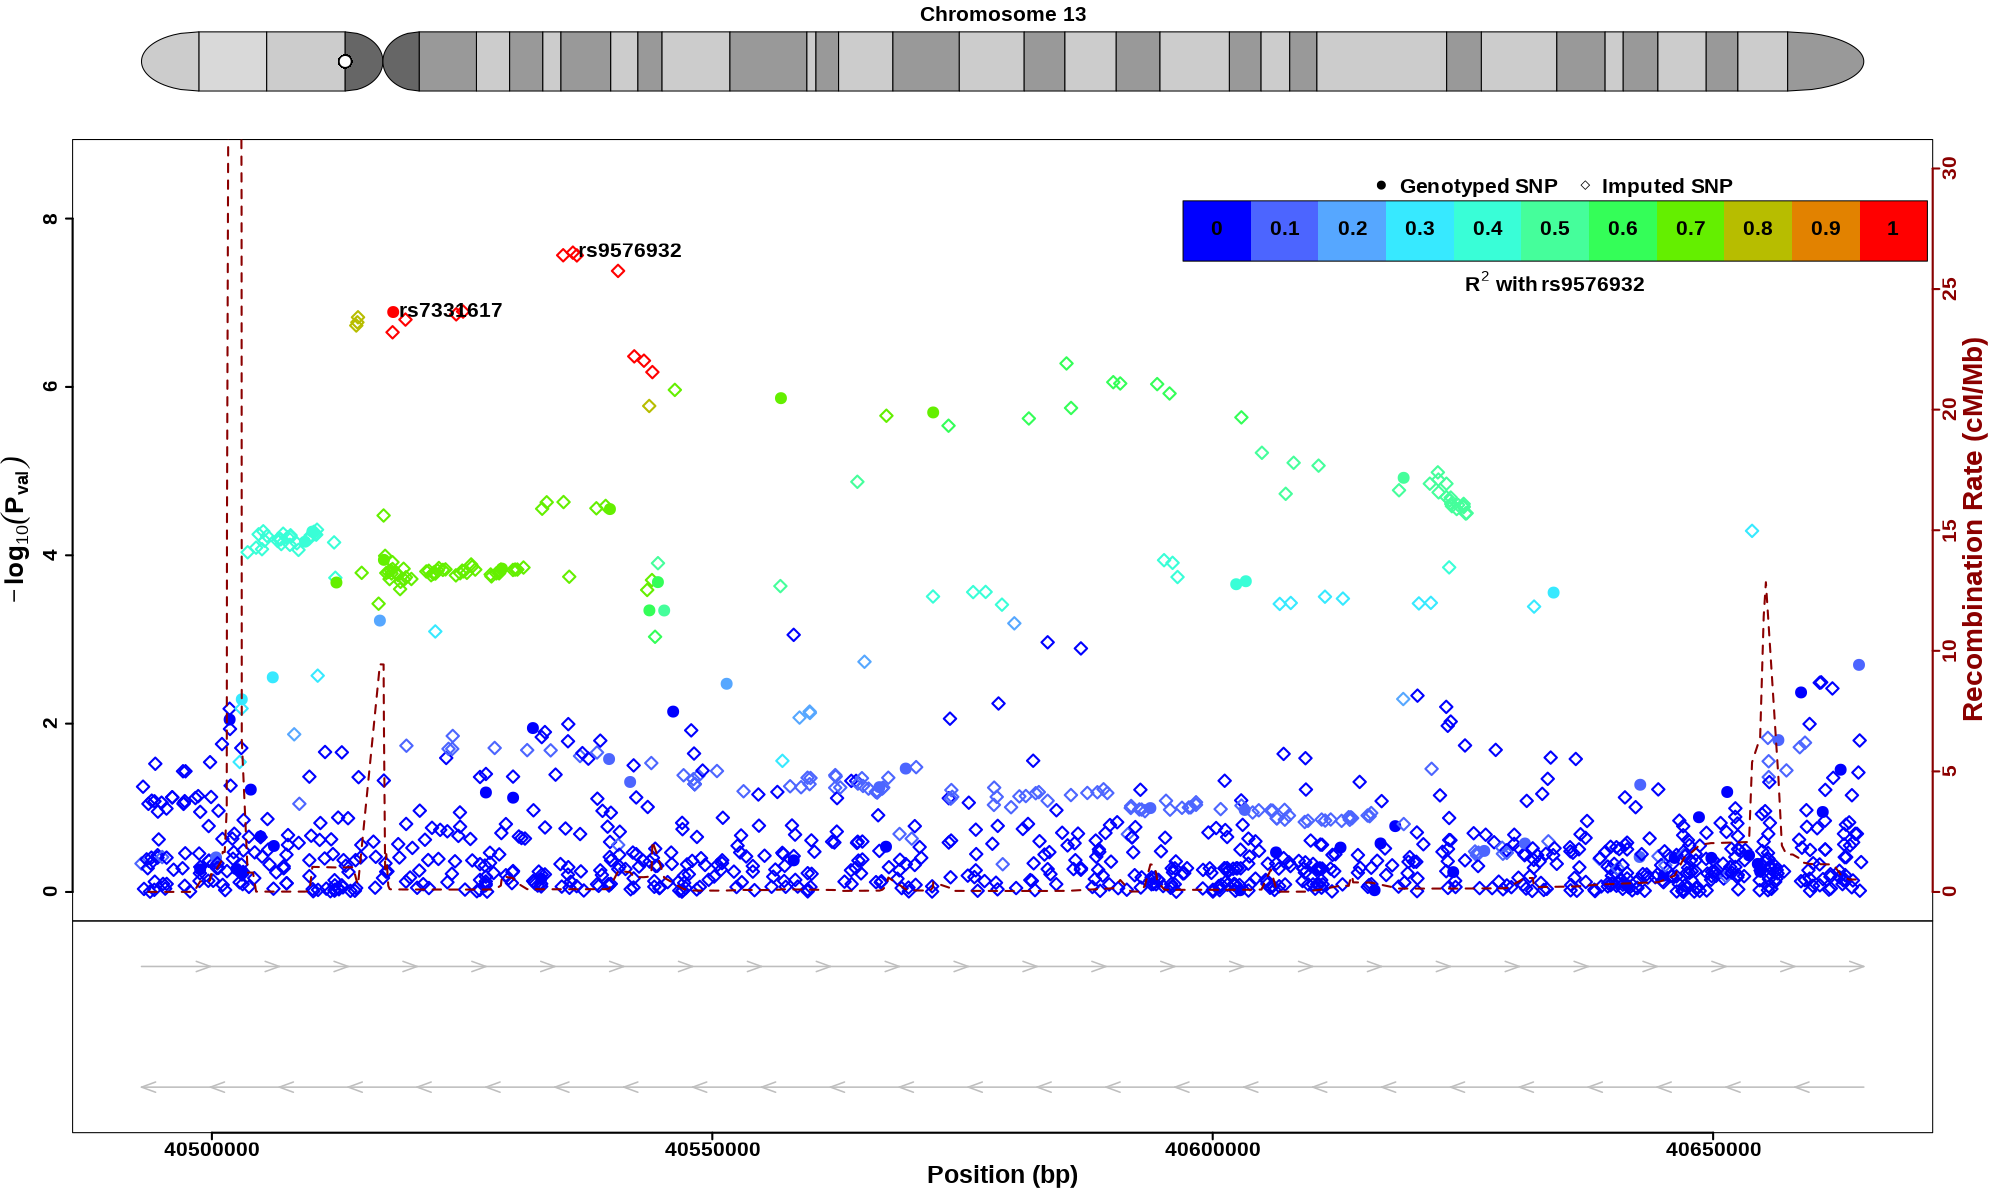

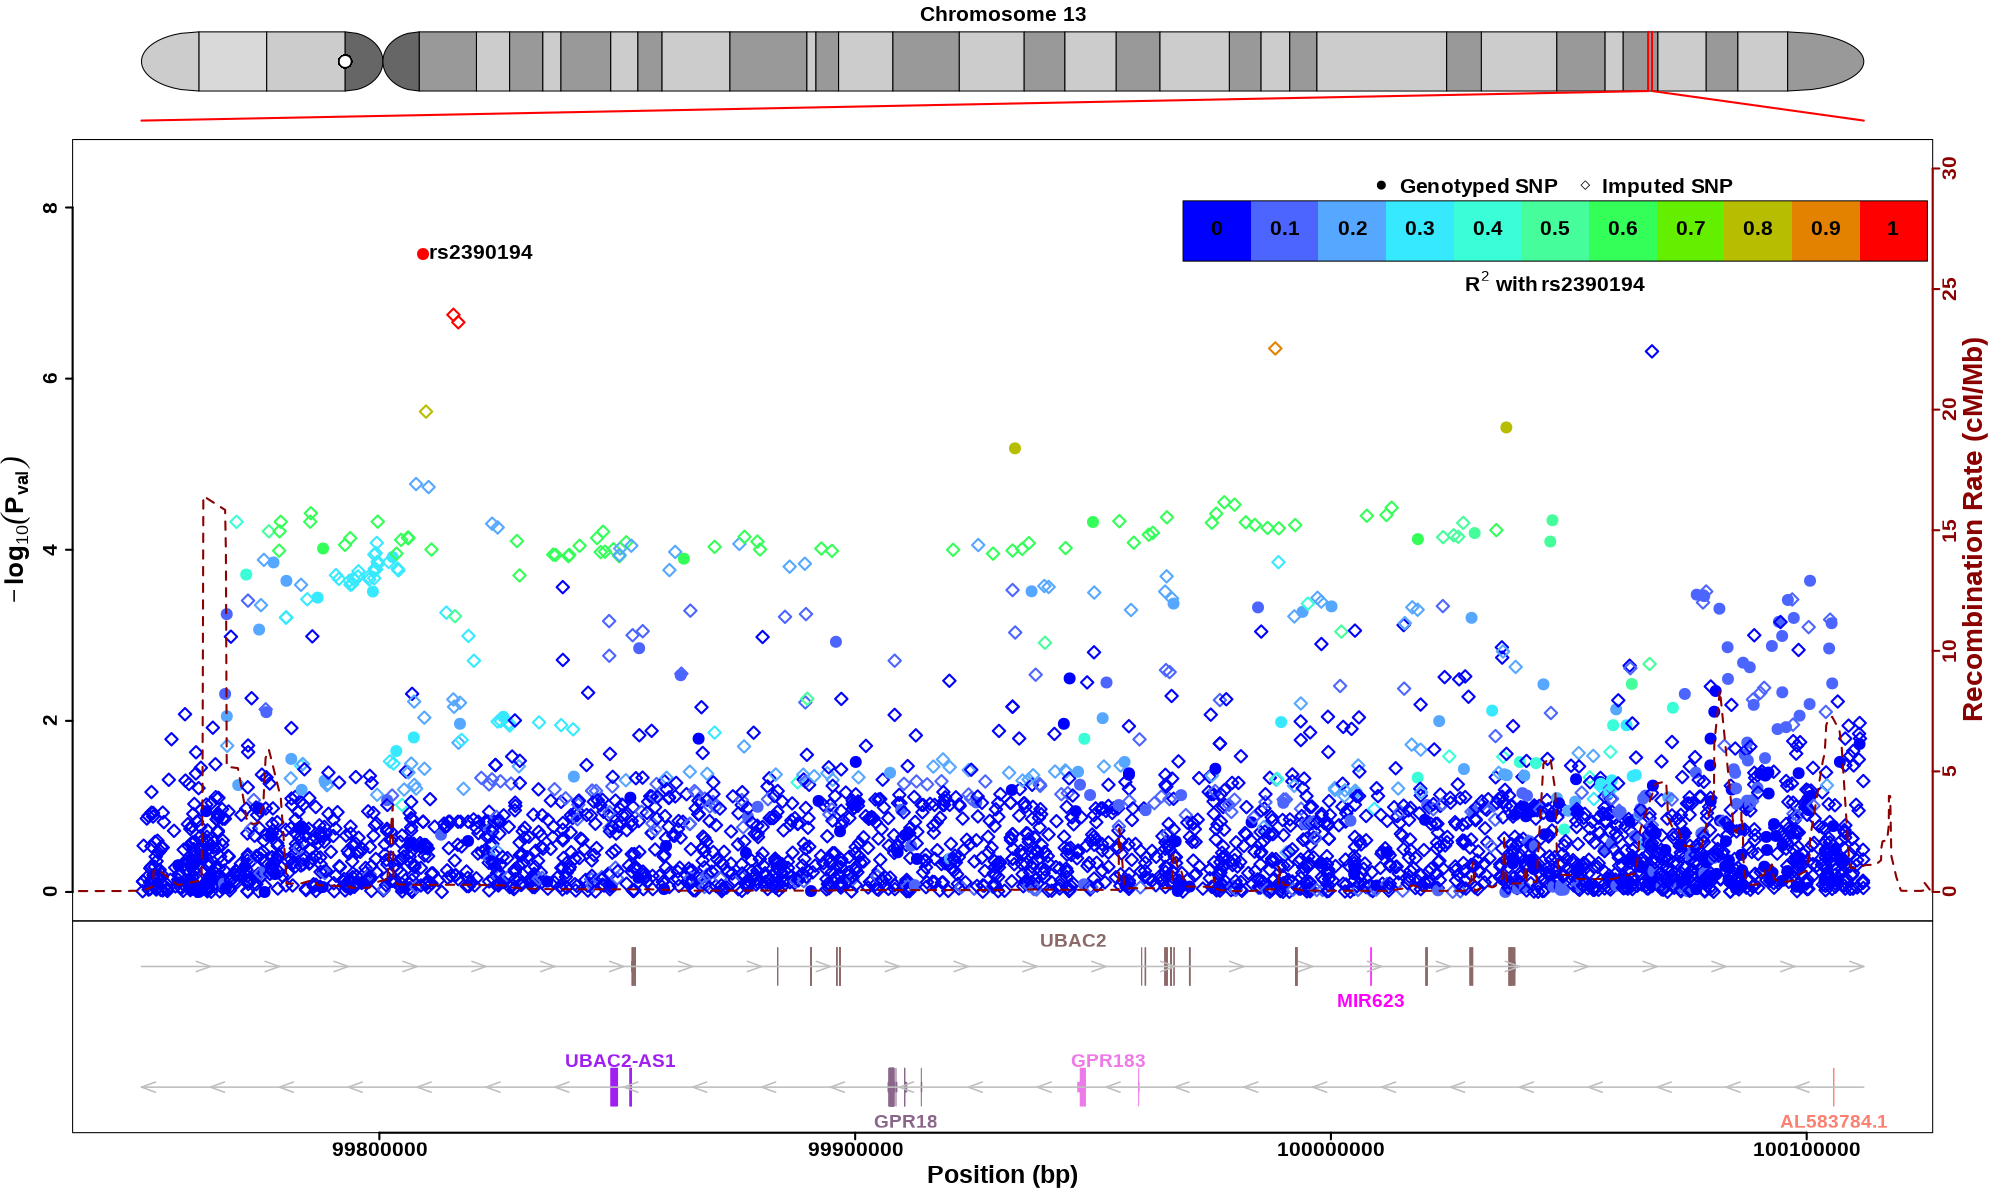

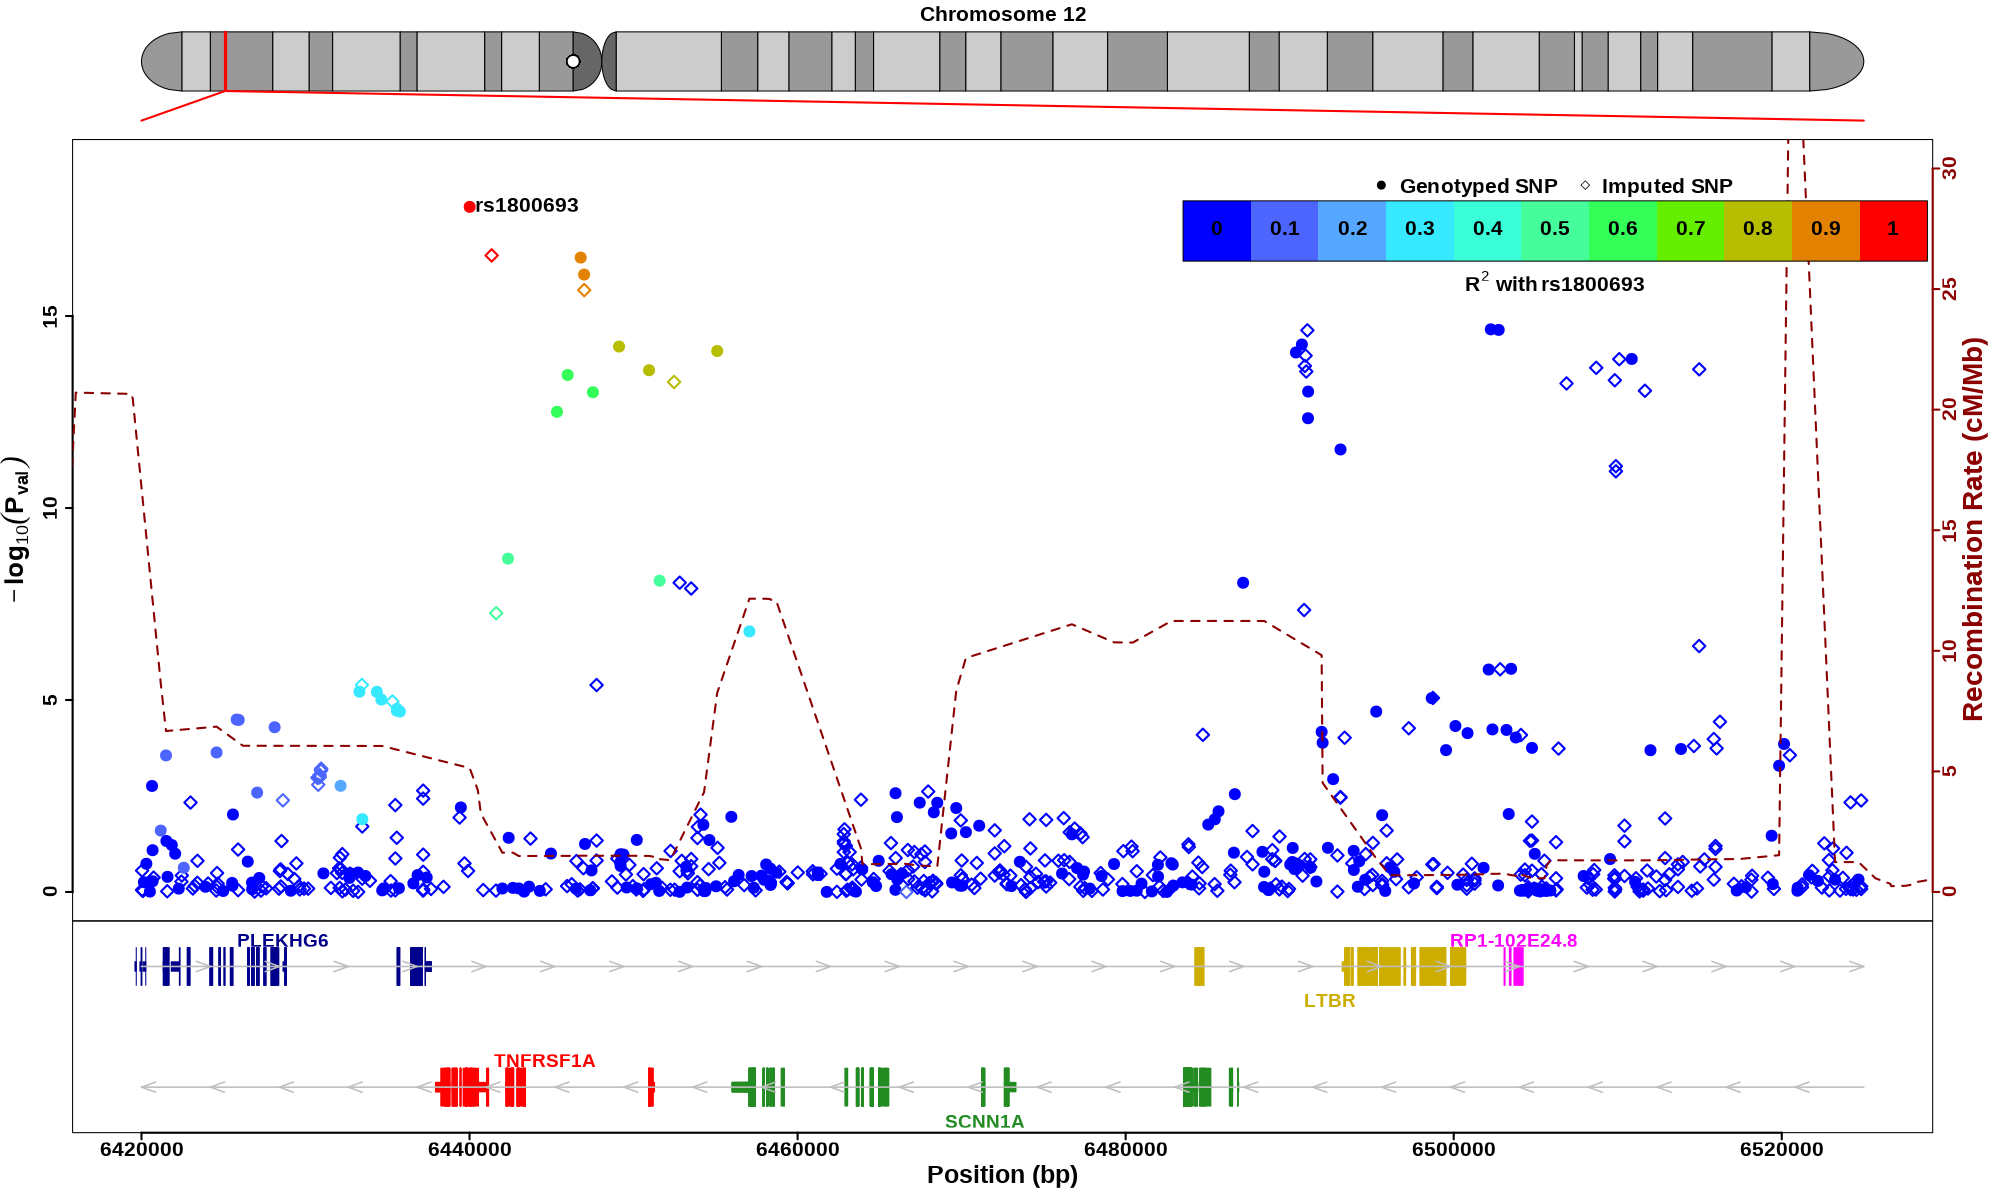

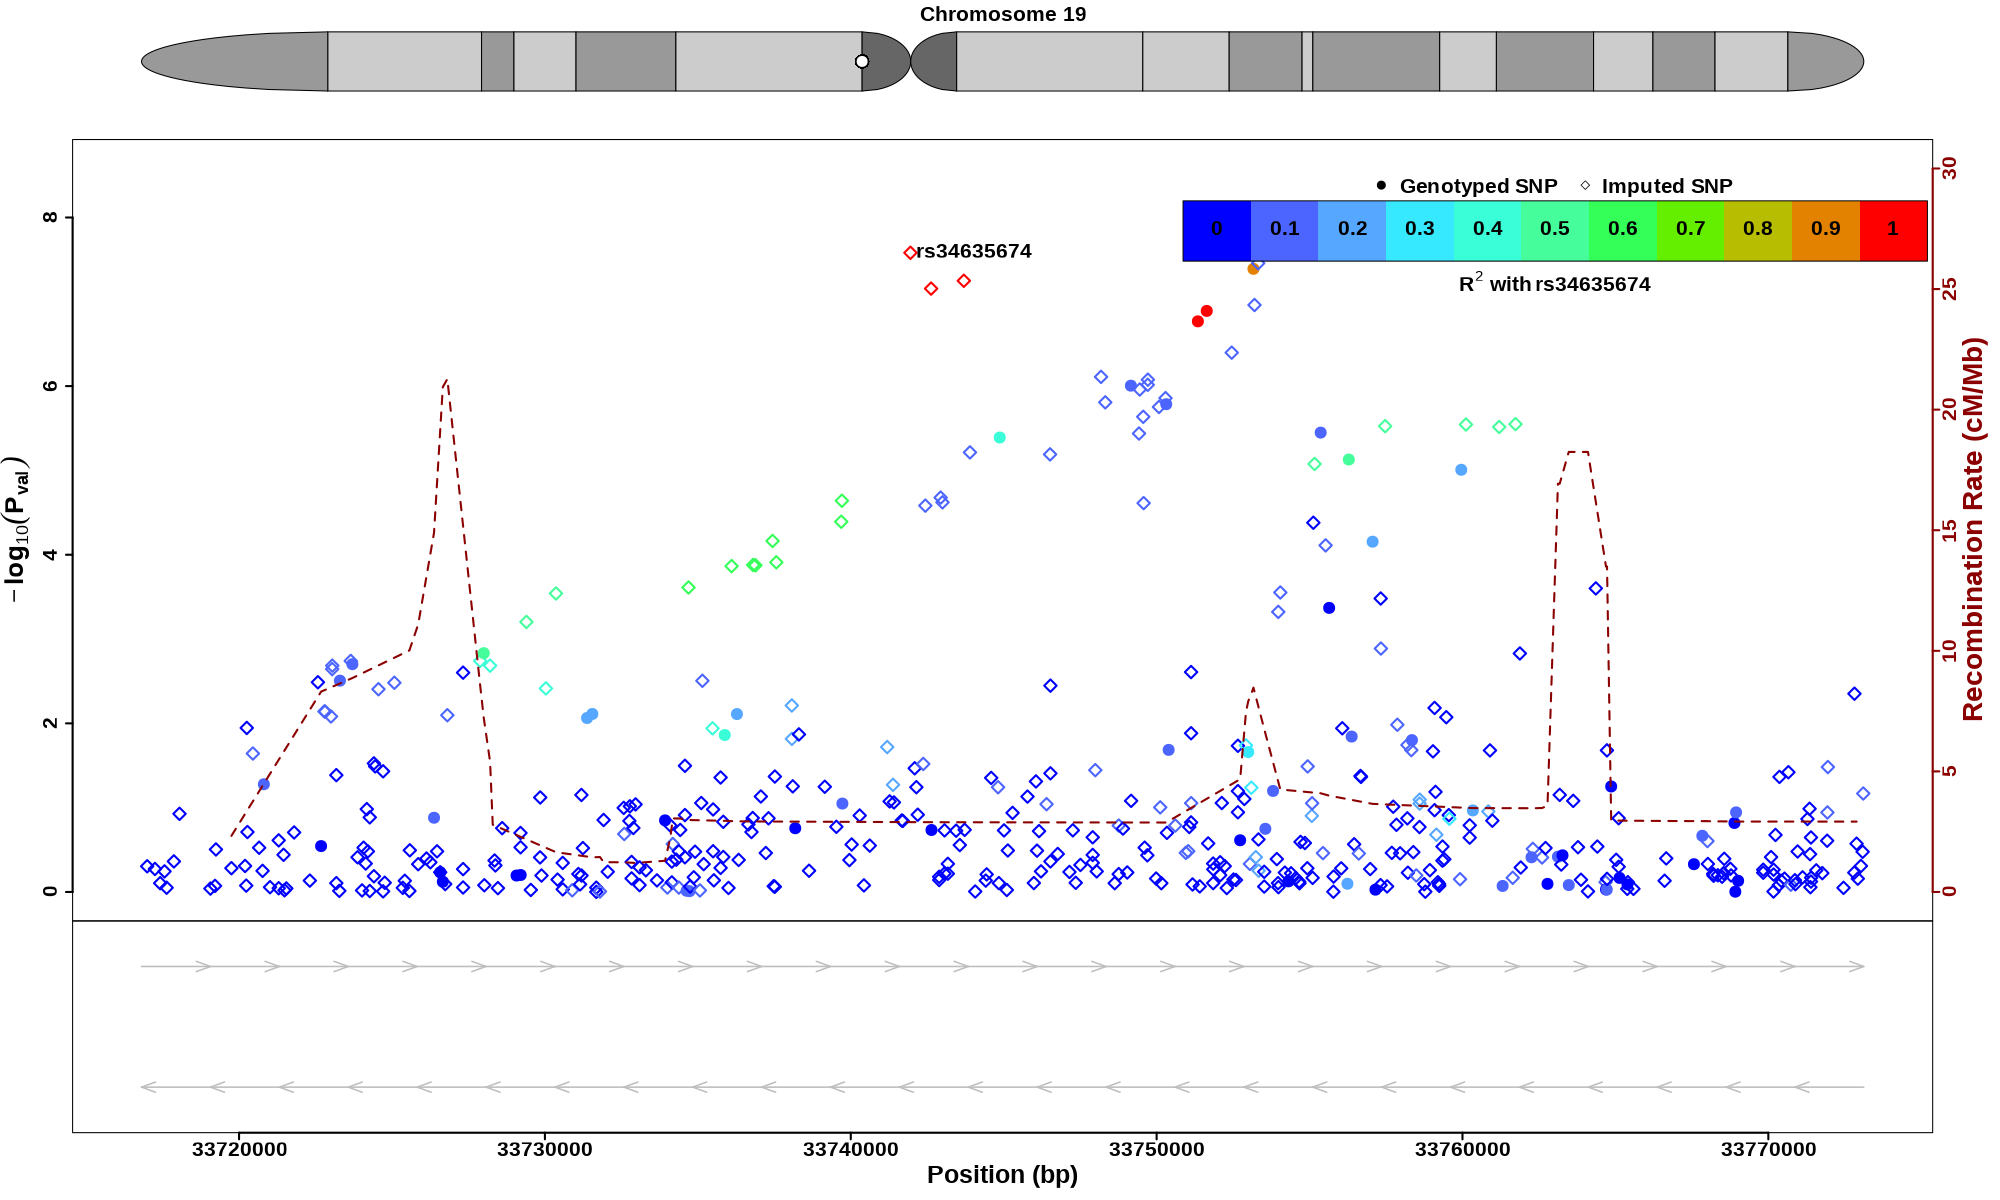


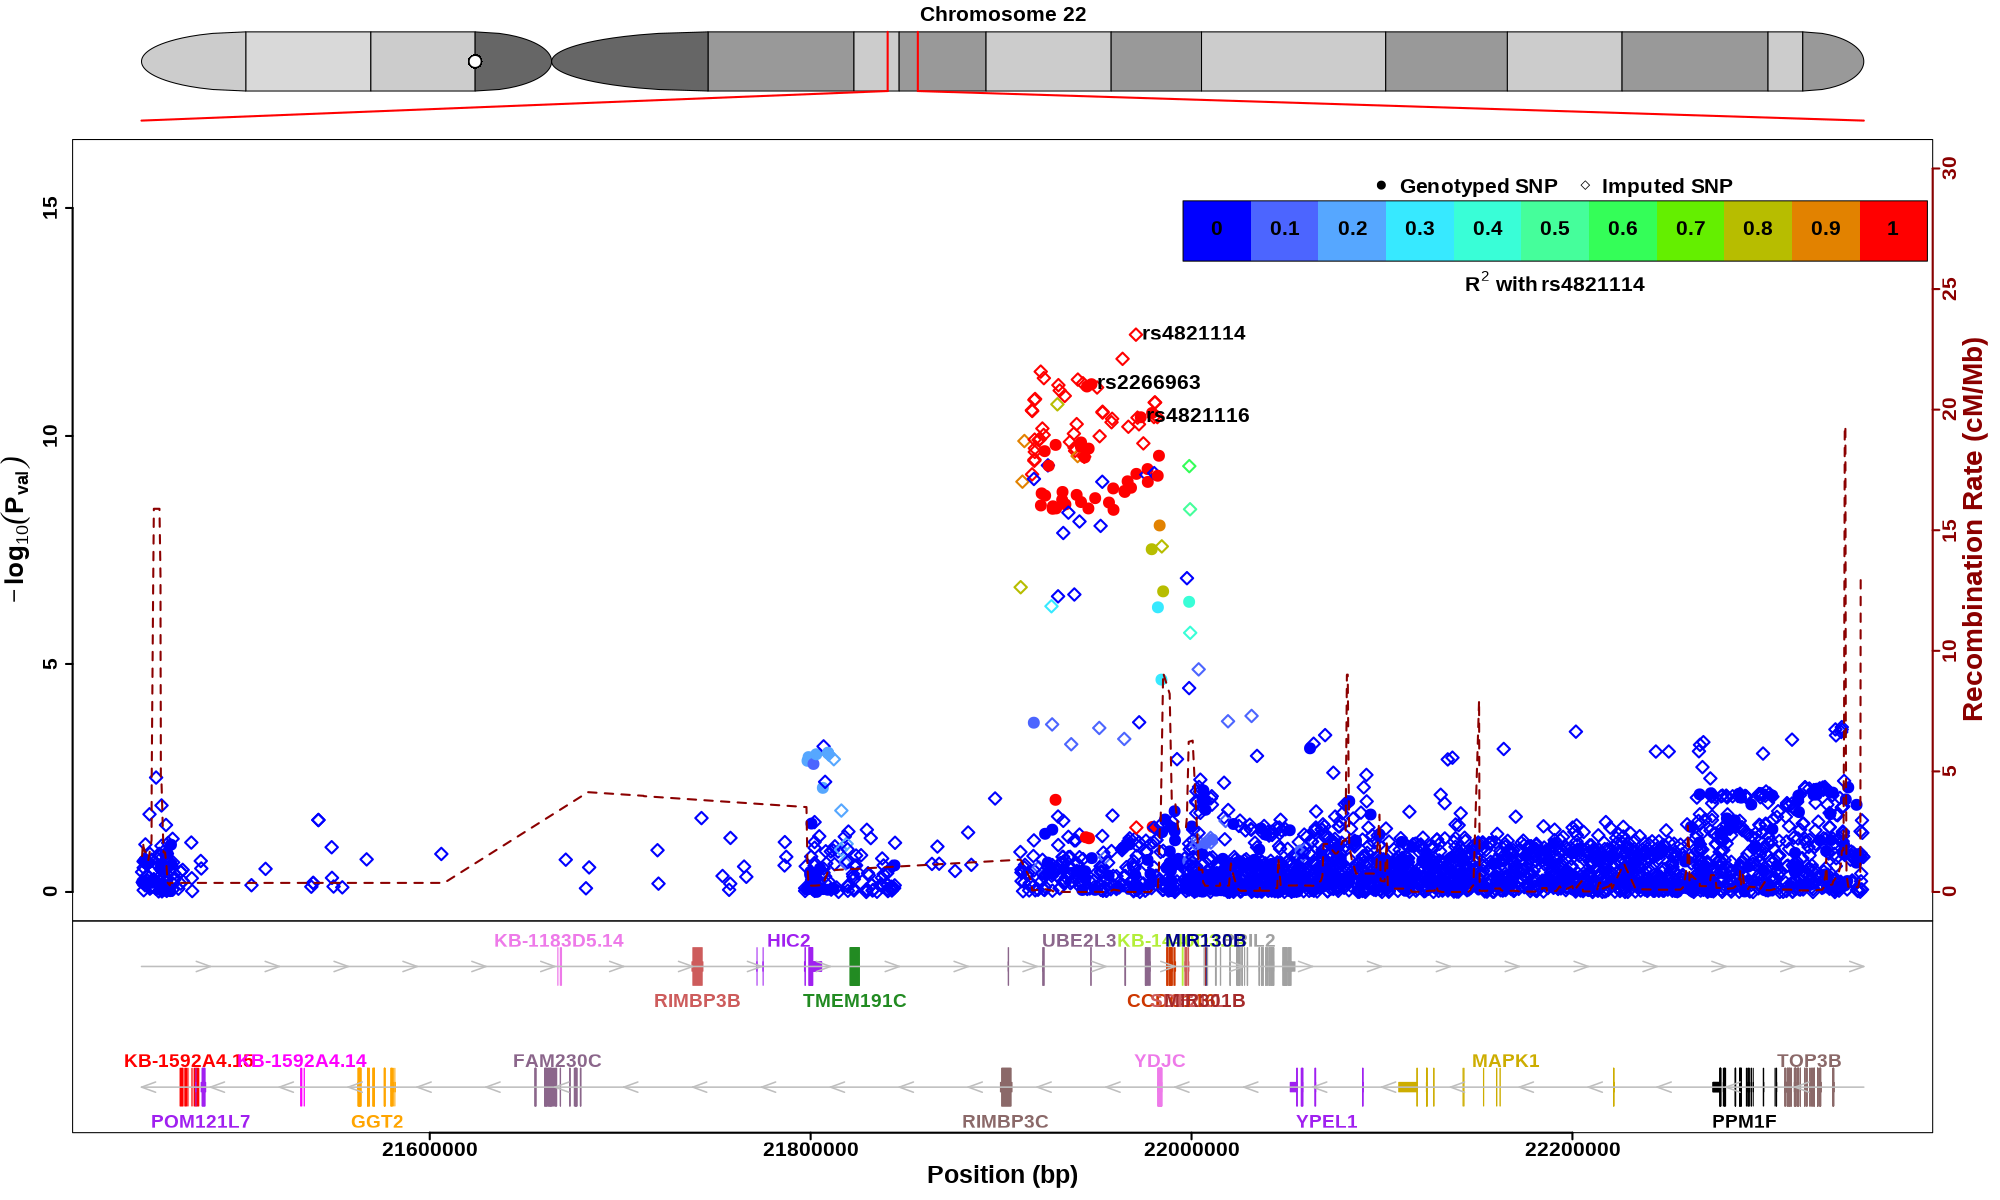

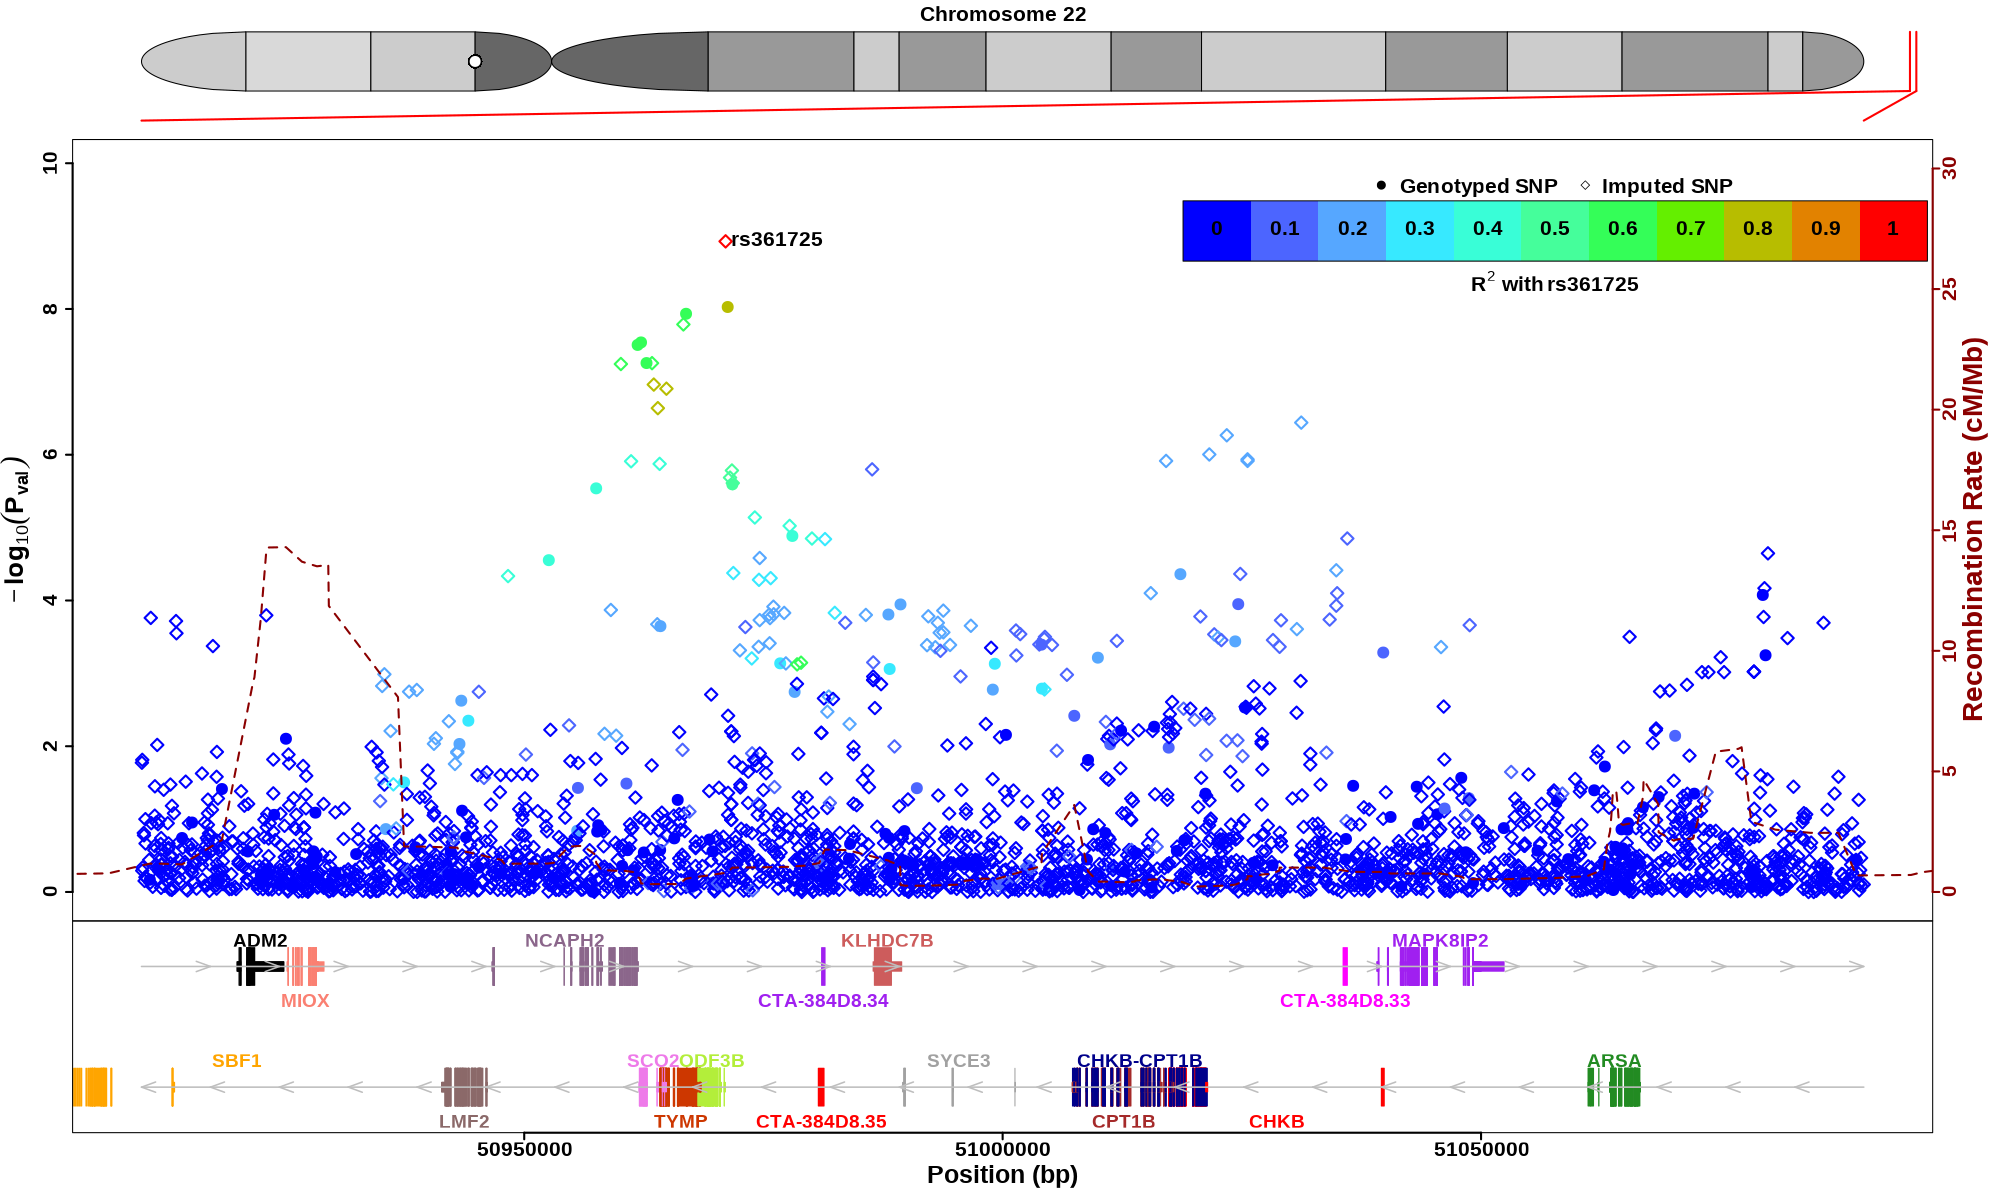

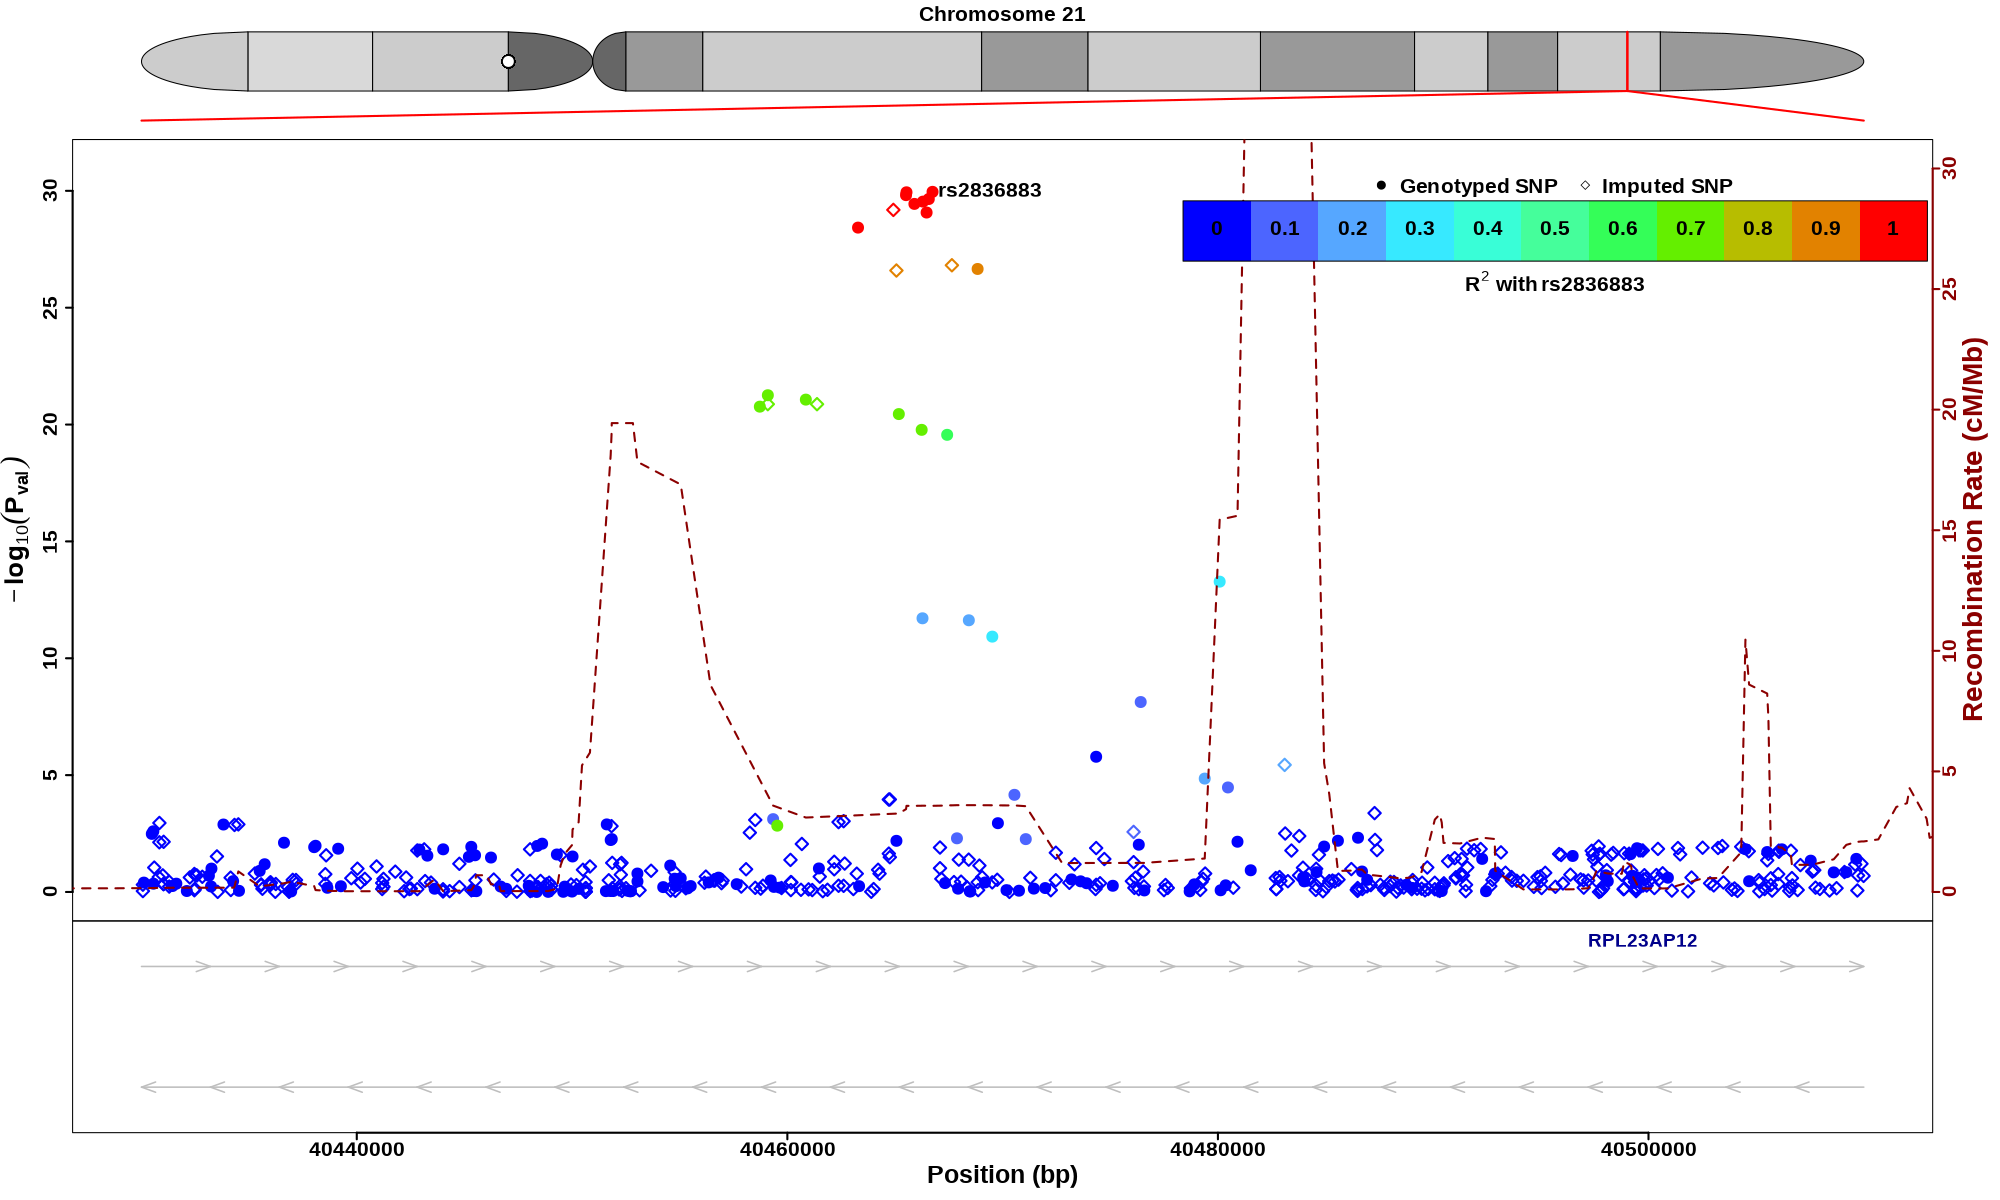

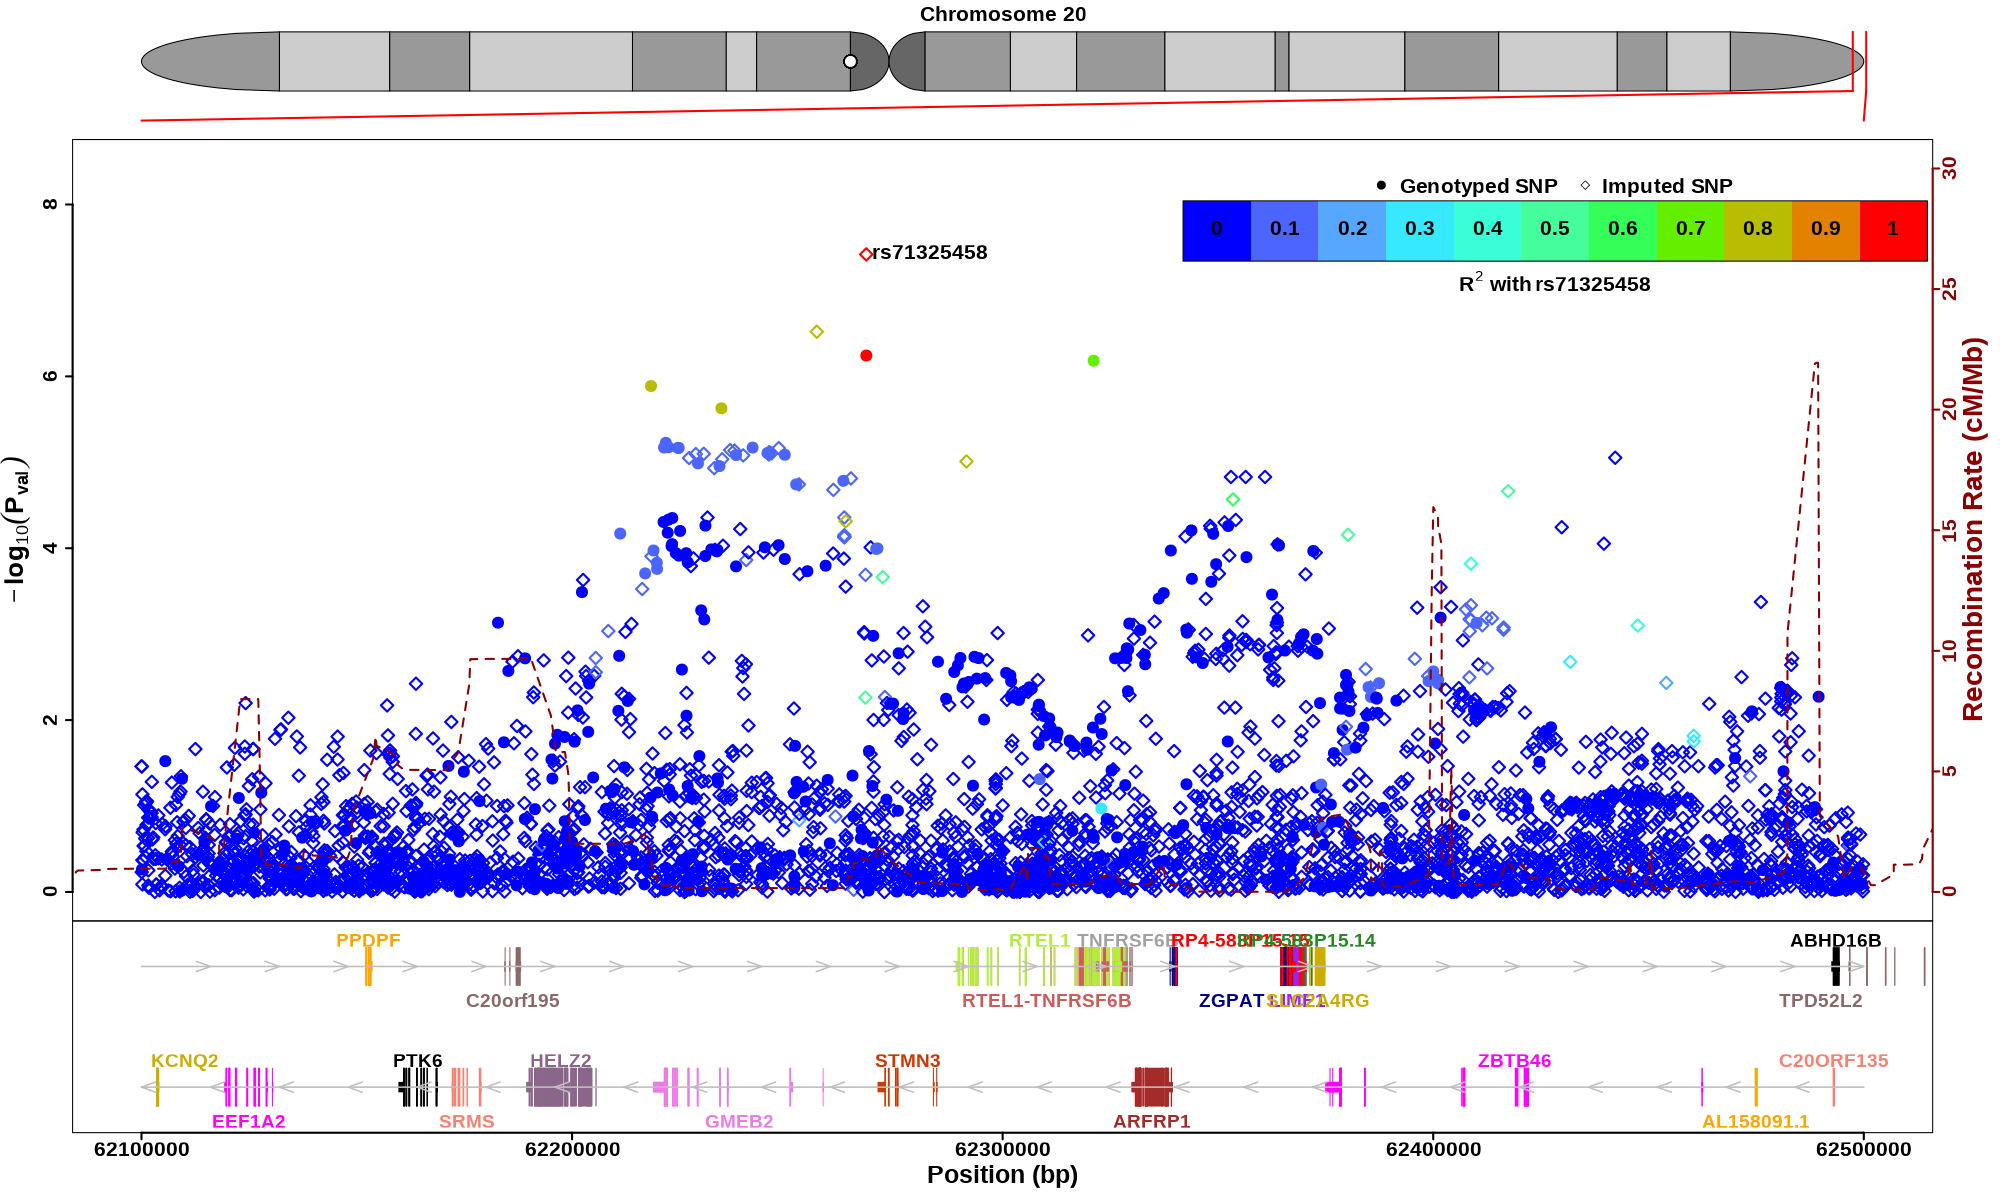

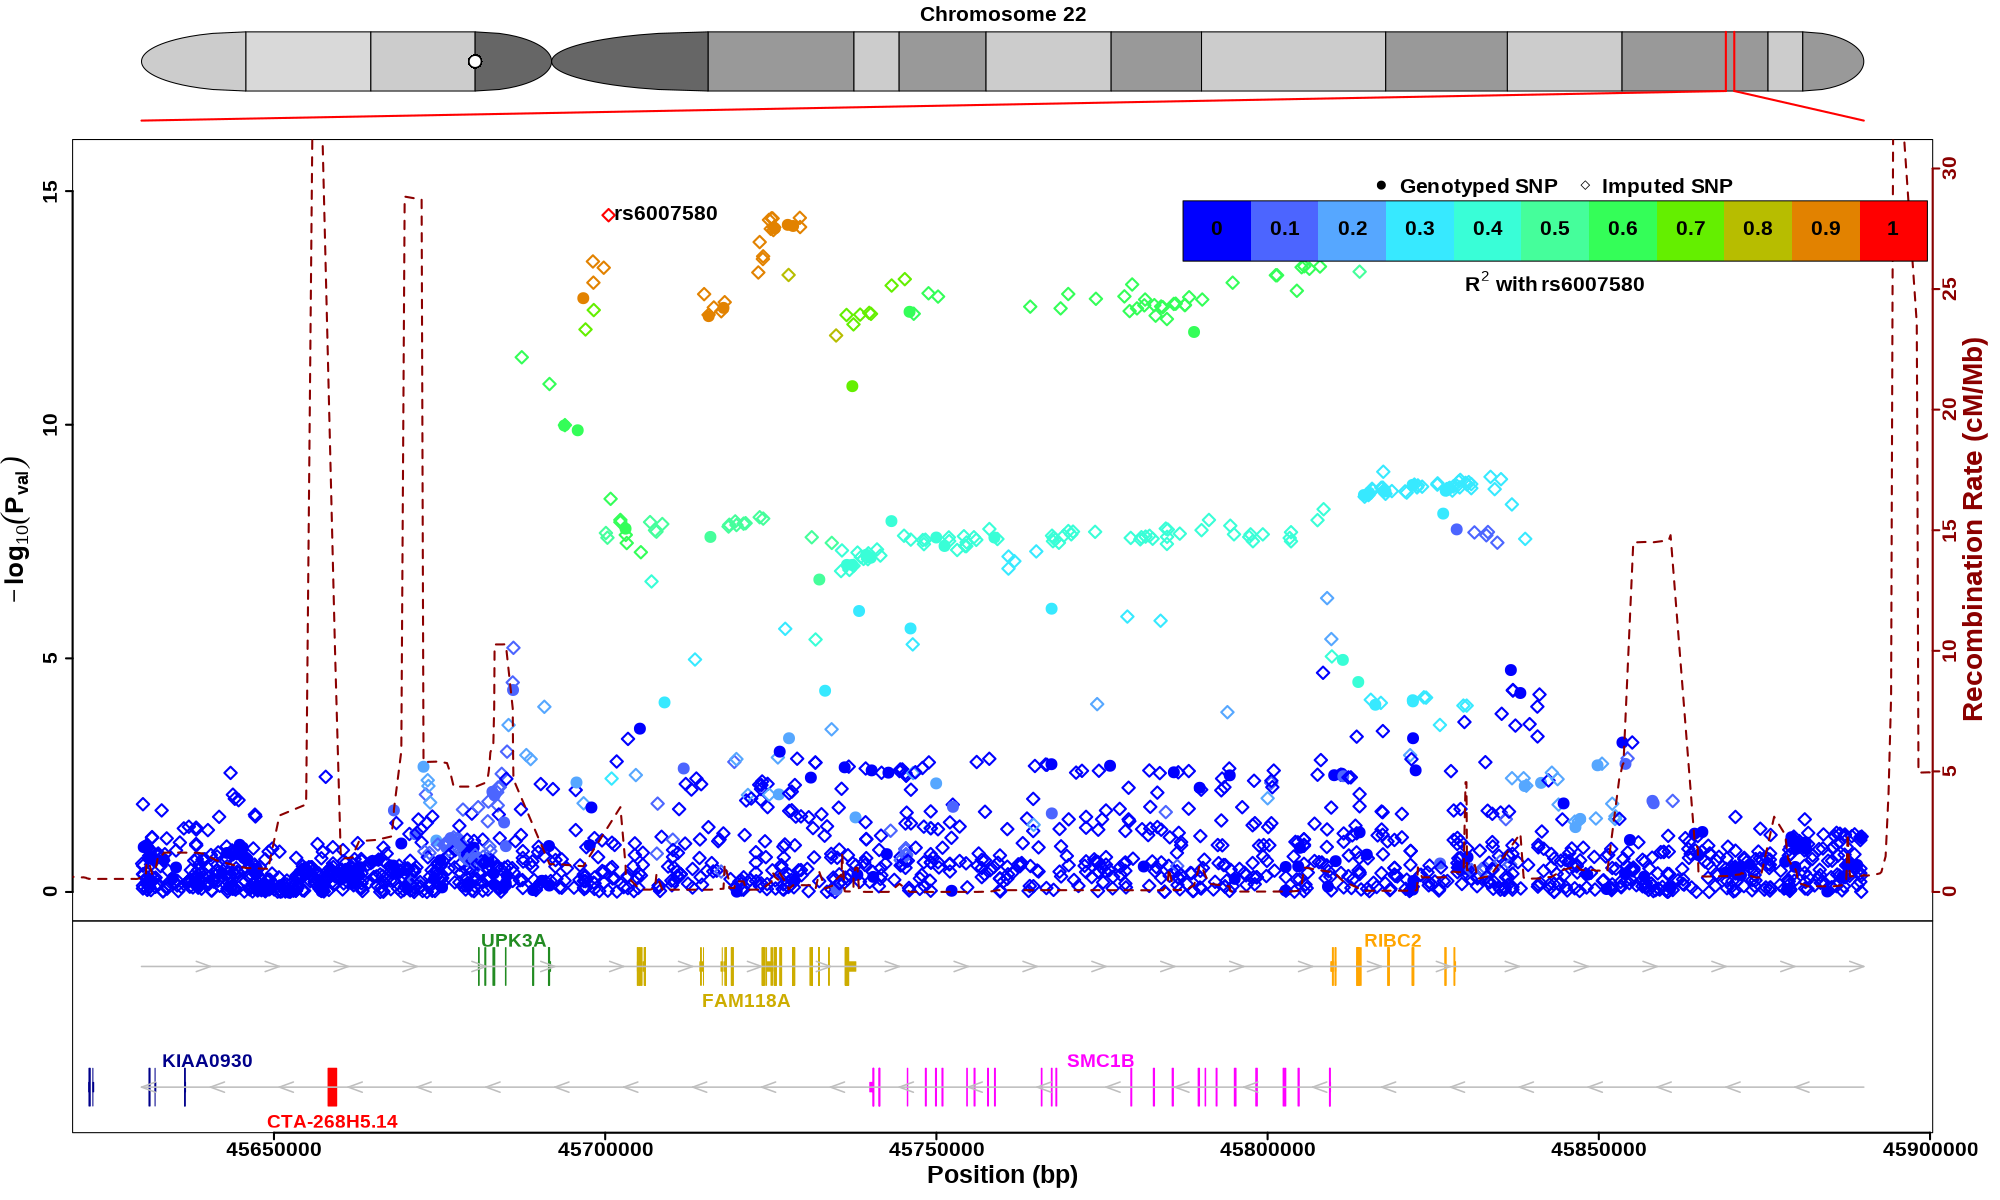

Supplement: Supplementary file 2 [file 149a34e2166a371e8a5c74a2.docx]
