# Supplementary material for: Multi-omic insights from a multi-ancestry genome-wide meta-analysis of ankylosing spondylitis reveal novel pathways of disease susceptibility
Source: Research Square preprint supplement (doi:10.21203/rs.3.rs-6917334/v1), 2025-07-14

**Figure S1.** qqplots of EUR, EAS analyses, and multi-ancestry meta-analysis. Red dashed lines indicate 95% CI of expected χ2 values, while magenta and blue points are the observed χ2 values of the entire dataset and the dataset excluding the MHC region, respectively. Note that the y-axis is truncated at -log10P = 30.  **(A)** qqplot of EUR meta-analysis. **(B)** qqplot of EAS meta-analysis. **(C)** qqplot of multi-ancestry meta-analysis.


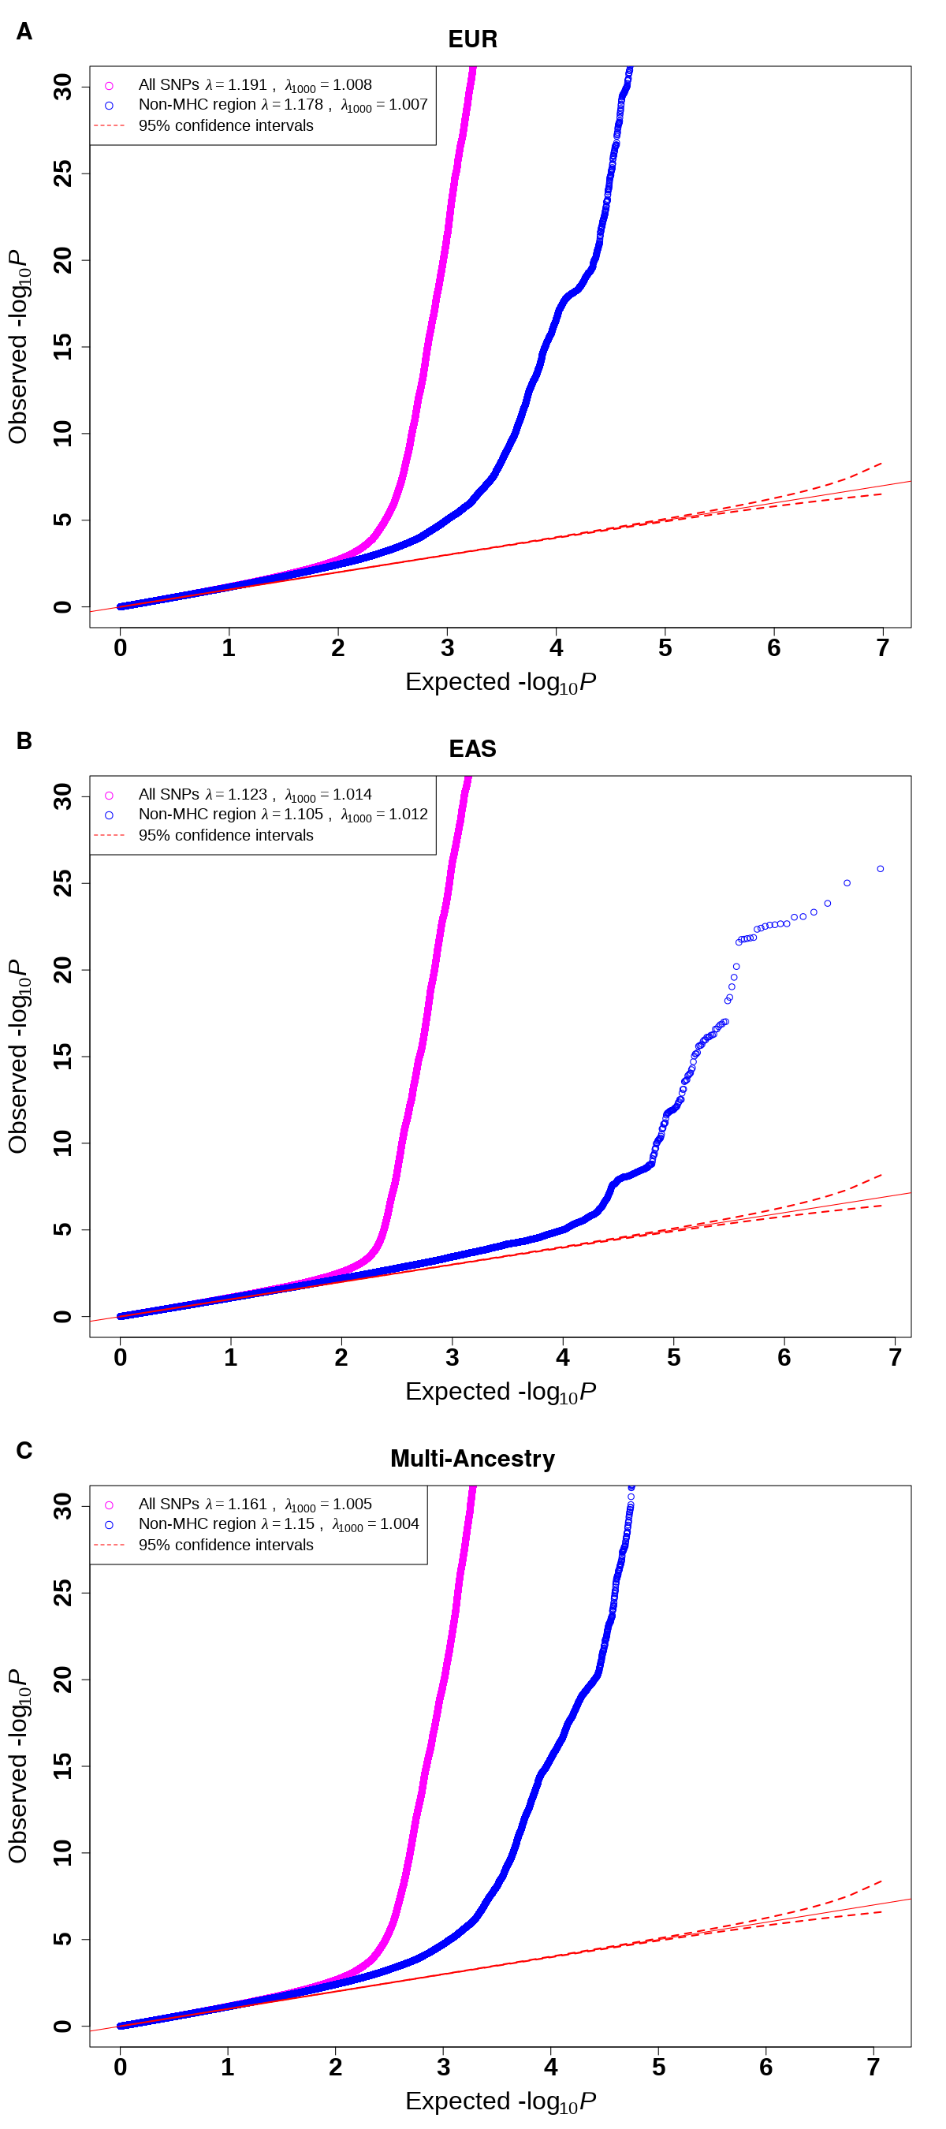

Supplement: Supplementary file 1 [file 047808c8515f7446238e5653.docx]
