# Supplementary material for: Multi-omic insights from a multi-ancestry genome-wide meta-analysis of ankylosing spondylitis reveal novel pathways of disease susceptibility
Source: Research Square preprint supplement (doi:10.21203/rs.3.rs-6917334/v1), 2025-07-14
Supplement: Supplementary file 3 [file 257f26f0ac7c7295654d8dae.docx]

**Figure S6. Causal effects of LTL on AS.**

(A) Scatter plot of the association between LTL and AS. (B) Leave-one-out analysis to assess the effect of each SNP in driving causality. (C) Application of funnel plots to detect whether the observed associations are significantly heterogeneous. IVW, inverse variance weighting; LTL, leukocyte telomere length; AS, Ankylosing Spondylitis; MR, Mendelian randomization; SNP, single nucleotide polymorphism.

**
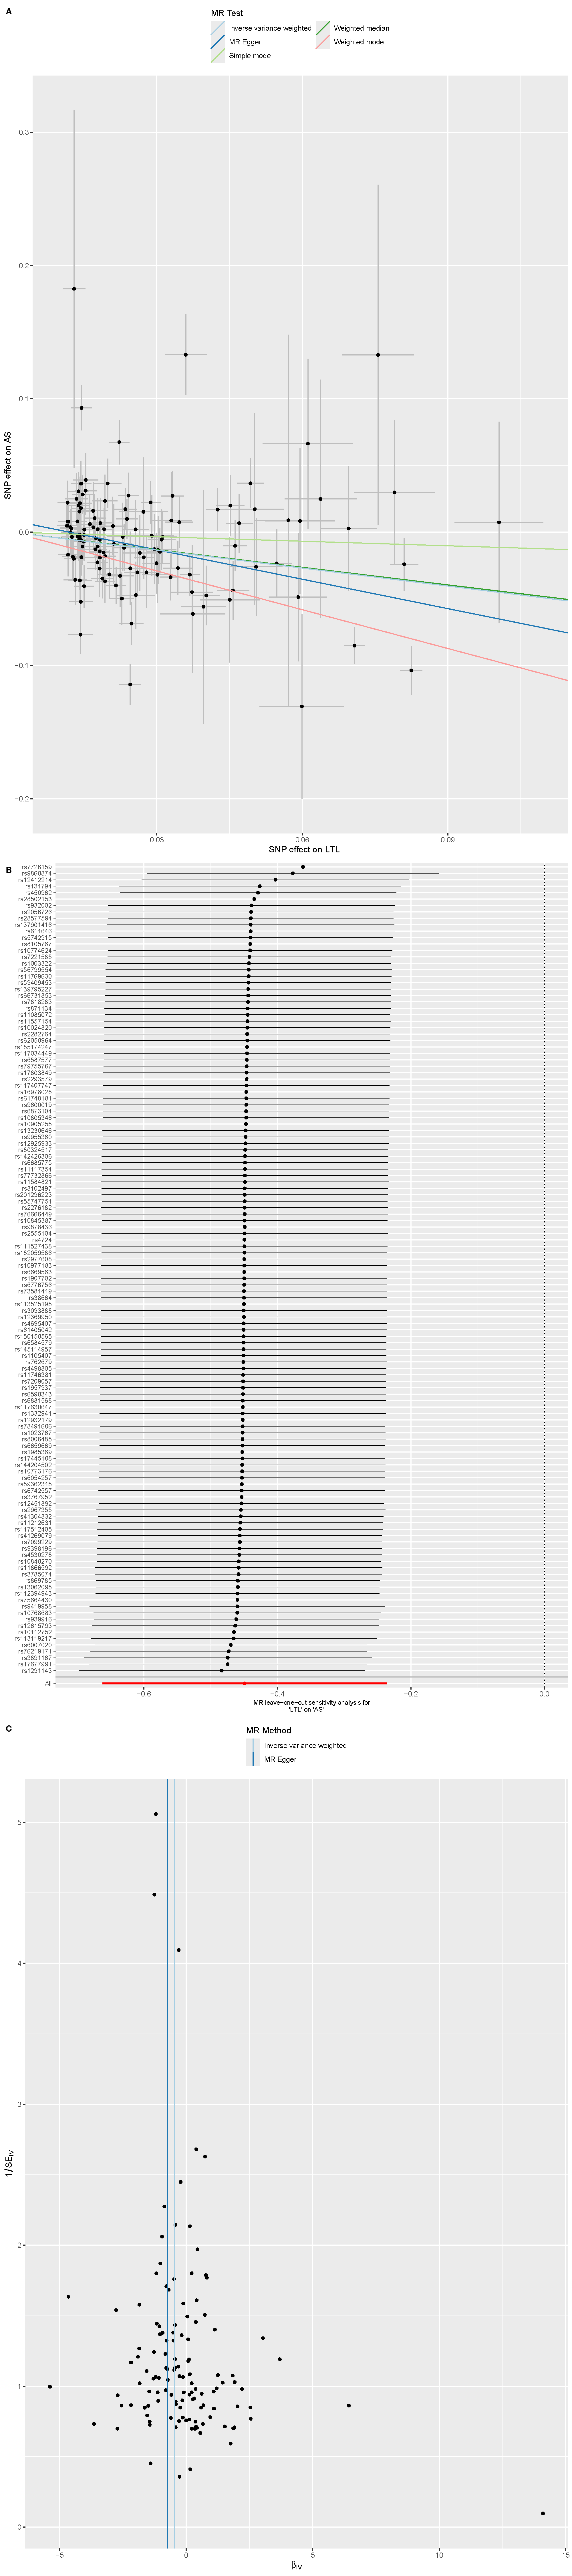
**
