# Supplementary material for: Multi-omic insights from a multi-ancestry genome-wide meta-analysis of ankylosing spondylitis reveal novel pathways of disease susceptibility
Source: Research Square preprint supplement (doi:10.21203/rs.3.rs-6917334/v1), 2025-07-14

**Figure S3:** Manhattan plot for EUR cohort restricted to HLA-B27-positive cases and controls (n=7011 and 2339 respectively, top panel) and HLA-B27-negative cases and controls (n=1492 and 24,973 respectively, bottom panel). The dashed line represents the threshold for genome-wide significance (P<5x10-8)


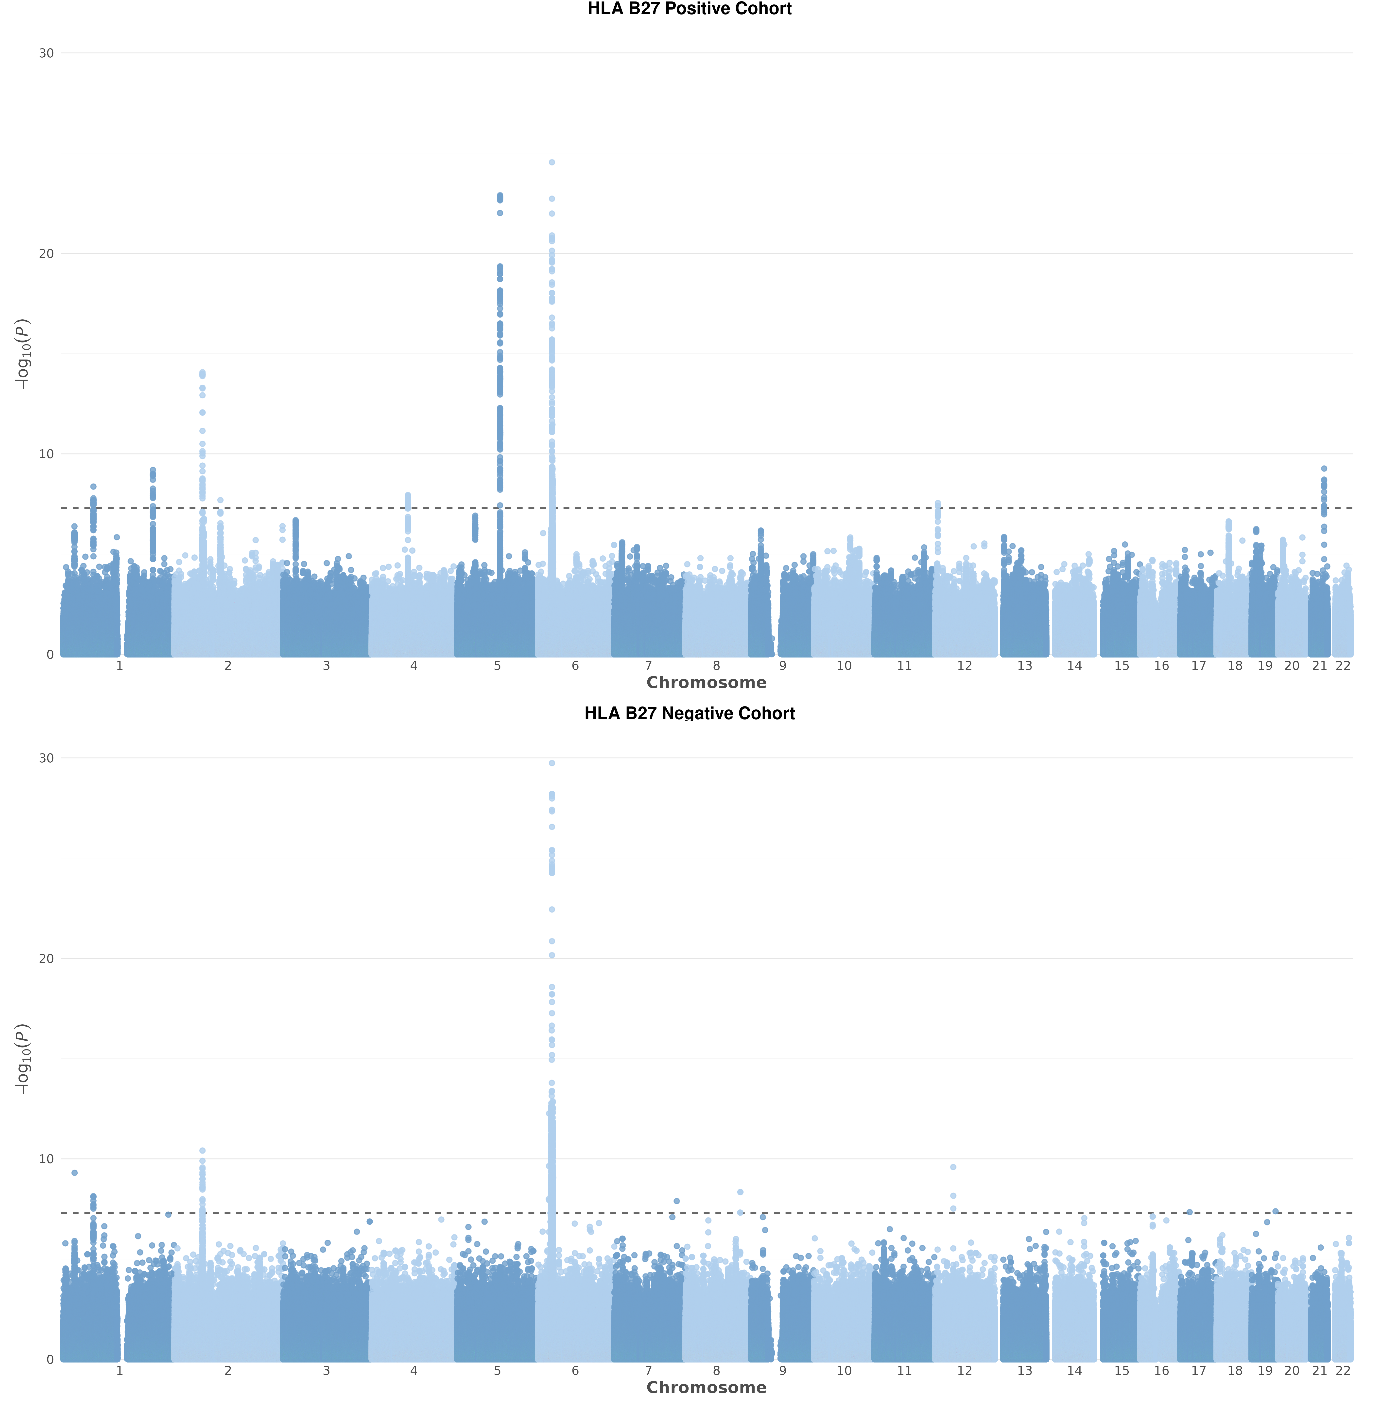

Supplement: Supplementary file 5 [file 76833dbbe94e3a8d9c75de94.docx]
