# Supplementary material for: Multi-omic insights from a multi-ancestry genome-wide meta-analysis of ankylosing spondylitis reveal novel pathways of disease susceptibility
Source: Research Square preprint supplement (doi:10.21203/rs.3.rs-6917334/v1), 2025-07-14
Supplement: Supplementary file 7 [file d336f6d6226b50e5bd8a3799.xlsx]

## Sheet: Table S1
Table S1: Sample sizes of GWAS for multi-ancestry and ancestry-specific meta-analyses.
European (EUR) Cohorts
Chip Type	Raw Cases	Raw Controls	​​Total Raw​​	QC-Passed Cases	QC-Passed Controls	​​Total QC​​
CoreExome	9816	32288	42104	8503	27312	35815
GSA	1610	19824	21434	1567	18465	20032
OmniExpress	1582	674	2256	1017	666	1683
Ichip	9069	13578	22647	4826	13326	18152
​​Total​​	22077	66364	88441	15913	59769	75682
East Asian (EAS) Cohorts
Chip Type	Raw Cases	Raw Controls	​​Total Raw​​	QC-Passed Cases	QC-Passed Controls	​​Total QC​​
CoreExome	6581	5723	12304	6027	5375	11402
OmniZhonghua	1965	3103	5068	1768	2894	4662
Ichip	577	1485	2062	577	1485	2062
​​Total​​	9123	10311	19434	8372	9754	18126
Iranian Cohort
Chip Type	Raw Cases	Raw Controls	​​Total Raw​​	QC-Passed Cases	QC-Passed Controls	​​Total QC​​
CoreExome	490	830	1320	420	755	1175
Turkish Cohort
Chip Type	Raw Cases	Raw Controls		QC-Passed Cases	QC-Passed Controls	​​Total QC​​
CoreExome	1004	1011	2015	940	946	1886
Overall	32694	78516	111210	25645	71224	96869

## Sheet: Table S2
Table S2: Genomewide-significant associated loci
CHR	BP	SNP	P	nearby gene	risk/non-risk allele	OR	95%CI	FREQ	Identified previously at GWS
1	25305114	rs6600247	8.98029e-22	RUNX3	T/C	0.89	0.87-0.92	0.454	Y
1	67705958	rs11209026	1.70813e-56	IL23R	A/G	0.61	0.57-0.64	0.062	Y
1	150527294	rs12124948	1.58955e-08	ADAMTSL4	T/C	1.08	1.05-1.11	0.417
1	154432877	rs6690230	5.68934e-19	IL6R	C/G	1.12	1.09-1.14	0.36	Y
1	161478859	rs4657041	4.93952e-18	FCGR2A	C/T	0.9	0.88-0.93	0.478	Y
1	169728137	rs2420505	8.62759e-09	SELE	G/A	1.08	1.05-1.11	0.241
1	200877850	rs41299637	7.29097e-44	INAVA	G/T	0.81	0.79-0.84	0.229	Y
1	206955041	rs3122605	3.54991e-10	IL10	G/A	1.11	1.08-1.15	0.125	Y
2	62560332	rs4672505	1.4026e-115	B3GNT2	A/G	1.3	1.27-1.33	0.392	Y
2	85933367	rs6547632	1.56398e-10	GNLY	A/G	0.93	0.90-0.95	0.39
2	102679286	rs12612130	4.3418e-14	IL1R1	G/T	1.1	1.07-1.12	0.646	Y
2	111811665	rs4848370	7.98822e-12	ACOXL	C/T	0.92	0.90-0.94	0.679
2	182038445	rs12620692	3.91968e-08	UBE2E3	G/T	0.93	0.91-0.95	0.527
2	231839516	rs3106083	2.98528e-11	SPATA3-AS1	G/A	1.11	1.08-1.14	0.319	Y
2	234296444	rs838717	7.37897e-10	DGKD	A/G	0.93	0.91-0.95	0.55	Y
2	241568326	rs34236350	4.21173e-30	GPR35	T/C	1.17	1.14-1.20	0.207	Y
3	27783015	rs13327021	8.27436e-17	EOMES	T/C	1.1	1.08-1.13	0.385	Y
3	28286802	rs74533039	1.74915e-13	AZI2	G/C	0.89	0.86-0.92	0.239
3	45995708	rs532777636	3.30091e-08	FYCO1	TGG/T	0.79	0.73-0.86	0.103
3	49463287	rs6446272	2.41151e-09	MST1	A/G	1.08	1.05-1.11	0.266	Y
3	159637678	rs76830965	4.94087e-08	IL12A	A/C	0.89	0.85-0.93	0.098
3	169486508	rs35446936	5.67533e-12	TERC	G/A	1.11	1.08-1.14	0.686
3	188125120	rs13093110	1.74431e-08	LPP	C/T	0.94	0.92-0.96	0.515
4	80907288	rs4610280	2.36357e-24	ANTXR2	G/A	0.86	0.84-0.89	0.373	Y
4	103423667	rs78573682	4.04037e-08	NFKB1	G/A	0.93	0.91-0.96	0.316	Y
5	1284135	rs4449583	1.04387e-11	TERT	T/C	1.09	1.06-1.11	0.343
5	35879156	rs6881706	2.17547e-13	IL7R	T/G	0.91	0.88-0.93	0.247
5	40366593	rs76502282	2.36505e-10	PTGER4	T/A	1.13	1.09-1.17	0.103	Y
5	96121152	rs2032890	1.28796e-104	ERAP1	C/A	0.73	0.71-0.75	0.245	Y
5	134451317	rs17659254	4.13241e-08	CTC-276P9.2	G/C	1.07	1.04-1.10	0.306
5	141510448	rs6580228	4.16811e-09	NDFIP1	C/T	0.93	0.91-0.95	0.367	Y
5	158826792	rs6871626	2.66846e-15	IL12B	A/C	1.1	1.07-1.13	0.339	Y
6	16663990	rs6459481	1.46641e-08	ATXN1	A/G	0.93	0.91-0.96	0.349	Y
7	17199229	rs66899436	7.88152e-12	AHR	C/T	0.92	0.90-0.94	0.404	Y
7	50353192	rs10261758	1.90185e-14	IKZF1	G/A	1.1	1.08-1.13	0.281	Y
7	100287495	rs221798	3.37304e-08	GIGYF1	C/G	1.11	1.07-1.15	0.102	Y
9	4984530	rs1887428	1.88786e-09	JAK2	G/C	1.07	1.05-1.10	0.368	Y
9	99172627	rs10118598	1.02744e-09	ZNF367	T/C	1.11	1.07-1.15	0.146
9	117575079	rs34077466	3.2858e-09	TNFSF15	A/T	1.09	1.06-1.12	0.204	Y
9	136137106	rs687289	1.67022e-09	ABO	A/G	1.07	1.05-1.10	0.353
9	139271850	rs11793497	2.85059e-15	CARD9	G/A	1.1	1.07-1.12	0.399	Y
10	64503349	rs224063	2.33022e-10	ADO	T/G	0.93	0.91-0.95	0.552	N
10	81042475	rs1250573	9.16387e-21	ZMIZ1	A/G	0.89	0.87-0.91	0.334	Y
10	90755056	rs6586165	3.19738e-17	FAS	A/T	0.91	0.89-0.93	0.472	Y
10	101288347	rs7085798	2.88036e-16	NKX2-3	C/A	1.1	1.07-1.12	0.488	Y
11	71159764	rs28364617	9.33108e-11	NADSYN1	G/T	0.92	0.90-0.94	0.698
11	128396738	rs7117118	3.44632e-18	ETS1	G/A	1.14	1.11-1.17	0.185	Y
12	6440009	rs1800693	1.43699e-18	TNFRSF1A	C/T	0.9	0.87-0.92	0.346	Y
13	40536069	rs9576932	2.54028e-08	SNORD116	A/T	1.08	1.05-1.11	0.522
13	99809175	rs2390194	3.49641e-08	UBAC2-AS1	A/G	1.07	1.04-1.09	0.449
14	88471141	rs28667727	9.45145e-11	GPR65	C/T	1.13	1.09-1.17	0.102	Y
15	63789952	rs17765311	4.62586e-10	CA12-USP3	C/A	1.1	1.07-1.14	0.281
16	3293407	rs61752717	3.6671e-12	MEFV	C/T	5.26	3.29-8.41	0.036	Y
16	28619132	rs2925630	1.65622e-21	IL27	C/T	1.12	1.10-1.15	0.365	Y
16	50166602	rs11076514	6.59214e-11	HEATR3	G/T	0.92	0.89-0.94	0.256
16	66894332	rs35301918	3.66045e-08	CA7	T/A	0.94	0.92-0.96	0.523
16	80044738	rs9935292	8.14949e-12	RP11-148M9.1	T/C	0.92	0.90-0.95	0.552
17	26096597	rs2297518	3.07455e-21	NOS2	A/G	1.14	1.11-1.18	0.189	Y
17	45786452	rs4794057	2.41381e-20	TBKBP1	T/C	1.11	1.09-1.14	0.511	Y
17	62160131	rs3744283	6.60412e-13	ERN1	C/G	1.12	1.09-1.16	0.198	Y
18	12805388	rs12967678	6.27002e-10	PTPN2	A/G	1.11	1.07-1.15	0.125	Y
19	10463118	rs34536443	8.70796e-19	TYK2	C/G	0.73	0.68-0.78	0.041	Y
19	33741951	rs34635674	2.62324e-08	CEBPA	G/A	0.93	0.90-0.95	0.28
19	36213072	rs28373672	2.46579e-09	KMT2B	G/A	1.1	1.06-1.13	0.231
20	62268333	rs71325458	3.81069e-08	RTEL1	G/A	0.72	0.64-0.81	0.02
21	40466744	rs2836883	1.10677e-30	21q22	A/G	0.84	0.81-0.86	0.248	Y
22	21970810	rs4821114	6.00167e-13	UBE2L3	C/G	1.1	1.07-1.13	0.226	Y
22	45700514	rs6007580	3.27997e-15	FAM118A	A/G	0.89	0.87-0.92	0.314	Y
22	50971047	rs361725	1.18012e-09	ODF3B	T/C	1.08	1.05-1.10	0.353

## Sheet: Table S3
Table S3: Cross disease AS-associated SNPs in multi-ancestry meta-analysis. 'Cross-disease only' represent SNPs previously associated in an analysis of pleiotropic associations (reference 18), where the association was not GWS but was experimentwise-significant for AS after controlling for other diseases.
SNP	CHR	BP	Candidate gene	FREQ	Beta	SE	P	A1	A2	N	Cross-disease only
rs6426833	1	20171860	NA	0.42479	0.0491631	0.0116282	2.35877e-05	G	A	96853	*
rs6600247	1	25305114	RUNX3	0.45415	-0.111533	0.0116325	8.98029e-22	T	C	96869
rs7517847	1	67681669	IL23R	0.42943	-0.115956	0.011574	1.26244e-23	G	T	96869
rs183686347	1	67703442	IL23R	0.00136	0.171065	0.233501	0.463797	A	G	38183
rs80174646	1	67708155	IL23R	0.0633	-0.489442	0.0312008	1.86094e-55	T	G	75682
rs10889676	1	67722567	IL23R	0.60155	-0.149673	0.0121258	5.289e-35	C	A	96869
rs4845604	1	151801680	RORC	0.12614	0.0257818	0.0174434	0.139402	A	G	96869
rs4129267	1	154426264	IL6R	0.4002	-0.0247201	0.0245489	0.313948	T	C	18126
rs4971079	1	155130391	HMGN2P18	0.45866	-0.0335424	0.0120365	0.0053243	G	A	96869	*
rs1333062	1	160846284	ITLN1	0.31635	-0.0431773	0.0122279	0.000413894	T	G	96869	*
rs10800314	1	161472789	FCGR2A	0.5961	-0.0869749	0.0124396	2.71458e-12	A	C	93808
rs61802846	1	161473873	FCGR2A	0.10492	0.0658479	0.01902	0.000536107	C	A	94807
rs12131796	1	200878727	C1orf106	0.2292	-0.205315	0.0148394	1.55031e-43	A	G	94807
rs3024493	1	206943968	IL10	0.13603	0.0964531	0.0167225	8.02829e-09	A	C	96869	*
rs12075255	1	206961628	NA	0.16412	-0.0432166	0.0154303	0.00509828	A	G	96869	*
rs2666218	2	9402988	ASAP2	0.25687	0.0459729	0.0148615	0.00197859	G	A	78717
rs13407913	2	25097644	ADCY3	0.45439	0.0293709	0.0114135	0.0100718	G	A	96869	*
rs201014116	2	25500905	DNMT3A	0.31309	0.0830029	0.0245384	0.000718095	C	A	20210	*
rs4672505	2	62560332	2p15	0.3924	0.263475	0.0115297	1.4026e-115	A	G	96869
rs4851529	2	102647300	IL1R2	0.40558	-0.0838155	0.0117082	8.14596e-13	A	G	96869
rs871656	2	102771282	IL1R1	0.18623	-0.0750663	0.014747	3.5755e-07	A	T	96869
rs72871627	2	163136942	IFIH1	0.01272	0.0867326	0.0558498	0.120432	G	A	78743
rs7426056	2	204612058	CD28	0.21106	0.0426785	0.0141087	0.00248661	A	G	96869	*
rs11676348	2	219010146	CXCR2	0.4623	0.0360088	0.01149	0.00172488	T	C	96869	*
rs12694846	2	231148128	SP140	0.22343	0.0496939	0.0145004	0.00061015	G	A	94807	*
rs3749171	2	241569692	GPR35	0.16582	0.155532	0.0151449	9.66054e-25	T	C	96869
rs4676406	2	241579108	GPR35	0.38909	-0.0913181	0.0126134	4.4938e-13	G	T	96869	*
rs10510607	3	28286261	CMC1	0.23749	-0.115532	0.0157473	2.19034e-13	T	C	78717
rs1001007	3	46428658	RP11-24F11.2	0.39757	-0.0249362	0.0120944	0.0392274	A	G	96869
rs3197999	3	49721532	MST1	0.23971	0.0747047	0.0136843	4.78357e-08	A	G	96869	*
rs6781808	3	137441372	NPM1P17	0.19012	0.0397171	0.0144764	0.00607723	C	T	96869
rs11098964	4	80887969	ANTXR2	0.36848	-0.148943	0.0148086	8.48439e-24	A	G	78717
rs3774937	4	103434253	NFKB1	0.34774	0.0562198	0.0118474	2.08158e-06	C	T	96869
rs11750385	5	10521668	RP11-1C1.5	0.34696	0.0291864	0.0441581	0.508643	G	T	5123
rs1992661	5	40414989	SNORA63	0.50726	0.0498611	0.0122263	4.53863e-05	A	G	96869	*
rs9687958	5	40496423	NA	0.63203	0.0613915	0.0121972	4.82227e-07	T	G	96865	*
rs71624119	5	55440730	ANKRD55	0.22128	-0.0686983	0.015414	8.31676e-06	A	G	83403	*
rs469758	5	96121715	ERAP1	0.61221	-0.243979	0.011795	4.72761e-95	T	C	96869
rs2549803	5	96174929	ERAP2	0.3103	-0.235306	0.0135185	7.40007e-68	T	C	93797
rs2910686	5	96252589	CTD-2260A17.2	0.42872	0.0307831	0.01159	0.00790725	C	T	96869
rs17622517	5	131803537	C5orf56	0.07193	0.0418632	0.0249065	0.0927986	C	T	78733
rs11749391	5	150229066	IRGM	0.16609	0.0383584	0.0185031	0.0381649	C	T	75656	*
rs6556411	5	158783223	IL12B	0.27355	-0.086401	0.0132368	6.6945e-11	G	T	96865	*
rs56167332	5	158827769	AC008697.1	0.34179	0.0931105	0.0119043	5.21555e-15	A	C	96869
rs1267499	6	14715882	NA	0.17519	-0.0655087	0.015359	1.99744e-05	T	C	96869	*
rs2328530	6	20643727	CDKAL1	0.18929	-0.0523458	0.0146339	0.000347534	G	A	96866
rs72928038	6	90976768	BACH2	0.17851	0.0548546	0.0167691	0.00107103	A	G	78743
rs582757	6	138197824	TNFAIP3	0.23684	0.0265162	0.0136924	0.0527982	C	T	96869
rs2451258	6	159506600	NA	0.31675	0.0422207	0.0129122	0.00107615	C	T	94807	*
rs2301436	6	167437988	FGFR1OP	0.45461	0.024388	0.0114512	0.0331927	T	C	96869	*
rs1525735	7	17197571	AHR	0.45182	-0.091419	0.0139679	5.95181e-11	T	C	78717
rs12718244	7	50175654	IKZF1	0.37393	0.0243556	0.0120833	0.0438382	A	G	96869	*
rs4917129	7	50323174	C7orf72	0.53356	0.0725819	0.0118661	9.54932e-10	C	T	96867	*
rs4728142	7	128573967	IRF5	0.38911	0.0530075	0.0121537	1.29223e-05	A	G	96869	*
rs10758669	9	4981602	JAK2	0.34506	0.0609734	0.0119312	3.21451e-07	C	A	96869	*
rs2812378	9	34710260	CCL21	0.31738	0.0375584	0.0134931	0.00537714	G	A	85467	*
rs726657	9	117696336	TNFSF8	0.38185	-0.0560607	0.0118766	2.3552e-06	T	C	96869	*
rs4986790	9	120475302	TLR4	0.05689	-0.0736757	0.0284463	0.00959779	G	A	78743	*
rs141992399	9	139259592	CARD9	0.00512	-0.300765	0.16166	0.0628173	G	C	38184
rs10870077	9	139263891	CARD9	0.29192	0.0836502	0.0240684	0.000509856	G	C	21187
rs3124998	9	139389432	NOTCH1	0.03377	0.0342437	0.0522624	0.512323	T	C	41929
rs2236379	10	6527143	PRKCQ	0.28626	0.0347275	0.0125988	0.00584382	A	G	96869	*
rs10761648	10	64354262	ZNF365	0.18412	0.0456271	0.0145262	0.00168356	T	C	96869	*
rs7915475	10	64381668	ZNF365	0.27283	-0.0300074	0.0131268	0.0222558	G	A	96869	*
rs1250573	10	81042475	ZMIZ1	0.33423	-0.114456	0.0122475	9.16387e-21	A	G	96869
rs1800682	10	90749963	ACTA2-FAS	0.43979	-0.0838773	0.0114933	2.92257e-13	G	A	96869
rs11190133	10	101278725	NKX2-3	0.30379	-0.0913657	0.0125106	2.81278e-13	T	C	96869	*
rs10748781	10	101283330	ADO	0.42743	0.0830064	0.0115236	5.88303e-13	C	A	96869
rs10750899	11	58284951	OR5B21	0.01389	0.00602903	0.0951252	0.949464	G	A	20012
rs11236797	11	76299649	RP11-672A2.7	0.45263	0.0613745	0.0114239	7.76681e-08	A	C	96869	*
rs7115956	11	109956346	ZC3H12C	0.48548	0.00466496	0.0129103	0.717849	C	T	78717
rs7933433	11	128194450	NA	0.34966	0.0997405	0.012188	2.75777e-16	T	G	93808	*
rs11221322	11	128346793	ETS1	0.17114	0.0805039	0.0148679	6.14223e-08	C	T	96869	*
rs11221332	11	128380974	ETS1	0.18786	0.125727	0.014751	1.55091e-17	T	C	96869	*
rs1860545	12	6446777	TNFRSF1A	0.34297	-0.105986	0.0125482	3.00706e-17	A	G	96859
rs11616188	12	6502742	LTBR	0.34549	0.10208	0.0128823	2.29899e-15	A	G	96869
rs12369214	12	107198611	RIC8B	0.36	-0.0385305	0.0118704	0.00117067	A	G	96869	*
rs3184504	12	111884608	SH2B3	0.39008	-0.0394287	0.0159653	0.0135242	T	C	70994
rs8006884	14	35563211	NFKBIA	0.35749	0.032133	0.0118729	0.00680118	C	T	96869	*
rs2145623	14	35839236	PPP2R3C	0.67634	0.0256681	0.0124929	0.0399166	G	C	96869	*
rs1569328	14	75741751	FOS	0.18055	-0.0739073	0.0149382	7.51619e-07	T	C	96869	*
rs11624293	14	88488821	GPR65	0.13725	0.0807168	0.0320778	0.0118601	C	T	21187
rs35874463	15	67457698	SMAD3	0.04917	0.0794475	0.0304279	0.00902763	G	A	75682	*
rs367569	16	11365500	TNP2	0.25379	-0.0337425	0.0133842	0.0117	T	C	96869	*
rs26528	16	28517709	IL27	0.44281	0.102267	0.0114826	5.28119e-19	C	T	96869
rs11574938	16	30485393	ITGAL	0.39267	0.0315188	0.0127163	0.0131891	G	C	96869	*
rs2066845	16	50756540	NOD2	0.01584	-0.117755	0.214402	0.582851	C	G	3061
rs72796367	16	50762771	NOD2	0.01714	-0.192963	0.0543861	0.00038813	C	T	75677	*
rs5743293	16	50763781	NOD2	0.0179	-0.00098	0.0899443	0.991307	I	D	18152
rs9797244	17	26097131	NOS2	0.18613	0.130288	0.0143805	1.30371e-19	C	T	96869
rs2779255	17	26137540	RP1-66C13.4	0.35613	0.11146	0.0118462	5.01437e-21	C	T	96869
rs9889296	17	32570547	NA	0.66824	0.0353254	0.0124714	0.00461842	G	A	96869	*
rs35736272	17	38032680	ZPBP2	0.43123	0.0360275	0.0116711	0.00202259	C	T	96869	*
rs12943464	17	45690351	NPEPPS	0.47765	0.0788512	0.0218812	0.00031384	A	T	21187
rs1292035	17	57989557	RPS6KB1	0.23393	0.0335356	0.0134549	0.0126871	A	G	96863	*
rs196941	17	62147192	ERN1	0.27662	0.0690991	0.0142711	1.28611e-06	G	C	78717
rs12968719	18	12879466	PTPN2	0.12976	0.0916165	0.0167355	4.39014e-08	A	G	96869	*
rs74956615	19	10427721	LSM14	0.04805	-0.269151	0.0325312	1.29934e-16	A	T	78743
rs35018800	19	10464843	RAVER1	0.00711	-0.461413	0.0908683	3.81799e-07	A	G	73999
rs12720356	19	10469975	TYK2	0.09422	0.0680283	0.0218653	0.00186302	C	A	78743
rs587259	19	34656406	TYK2	0.34142	-0.0479566	0.0158342	0.00245634	T	C	65253	*
rs679574	19	49206108	FUT2	0.41648	0.0377605	0.0128829	0.00337823	G	C	94807	*
rs4243971	20	30849517	NA	0.35321	-0.0598274	0.0153371	9.58639e-05	T	G	76655	*
rs6058869	20	31348750	DNMT3B	0.47415	-0.0372324	0.0145775	0.0106465	C	T	78717	*
rs2823288	21	16820888	NA	0.26197	0.00829419	0.0150061	0.580453	A	G	78717
rs9977672	21	40463283	NA	0.24192	-0.173797	0.0155073	3.7512e-29	A	G	78717
rs4456788	21	45616324	AP001057.1	0.41402	0.0542228	0.0130713	3.35065e-05	G	A	78717
rs2266961	22	21928597	UBE2L3	0.37313	0.0590647	0.0227825	0.00952686	G	C	21187	*
rs2143178	22	39660829	AL031590.1	0.14216	-0.0759316	0.0168709	6.77176e-06	C	T	96869	*
rs1569414	22	45727565	FAM118A	0.31842	-0.110241	0.0140972	5.27875e-15	G	T	78717

## Sheet: Table S4
Table S4: Imputed HLA-B allele counts and frequencies in EUR and EAS cases and controls.
	EUR ancestry				EAS ancestry
HLA-B allele	Case_N	Case_%	Control_N	Control_%	Case_N	Case_%	Control_N	Control_%
HLA_B*07:02	1173	6.9	7484	13.7	130	1.08	166	1.54
HLA_B*07:04	1	0.01	17	0.03	0	0	0	0
HLA_B*07:05	18	0.11	132	0.24	39	0.32	54	0.5
HLA_B*08:01	1368	8.04	6848	12.54	34	0.28	74	0.69
HLA_B*13:01	1	0.01	3	0.01	297	2.46	417	3.88
HLA_B*13:02	202	1.19	1183	2.17	287	2.38	584	5.43
HLA_B*14:01	111	0.65	598	1.09	3	0.02	5	0.05
HLA_B*14:02	272	1.6	1503	2.75	11	0.09	14	0.13
HLA_B*14:03	0	0	1	0	0	0	0	0
HLA_B*15:01	624	3.67	3487	6.38	299	2.48	656	6.1
HLA_B*15:02	0	0	0	0	237	1.97	296	2.75
HLA_B*15:03	11	0.06	45	0.08	7	0.06	6	0.06
HLA_B*15:07	0	0	0	0	16	0.13	34	0.32
HLA_B*15:08	0	0	2	0	0	0	0	0
HLA_B*15:10	4	0.02	11	0.02	0	0	0	0
HLA_B*15:11	0	0	0	0	104	0.86	223	2.07
HLA_B*15:12	0	0	0	0	13	0.11	15	0.14
HLA_B*15:16	3	0.02	28	0.05	0	0	0	0
HLA_B*15:17	20	0.12	188	0.34	4	0.03	17	0.16
HLA_B*15:18	38	0.22	167	0.31	80	0.66	136	1.27
HLA_B*15:25	0	0	0	0	20	0.17	28	0.26
HLA_B*15:27	0	0	0	0	36	0.3	77	0.72
HLA_B*15:37	0	0	1	0	0	0	0	0
HLA_B*18:01	388	2.28	2280	4.17	10	0.08	25	0.23
HLA_B*18:02	0	0	0	0	10	0.08	7	0.07
HLA_B*18:03	0	0	0	0	0	0	1	0.01
HLA_B*27:02	306	1.8	150	0.27	28	0.23	1	0.01
HLA_B*27:03	1	0.01	4	0.01	0	0	1	0.01
HLA_B*27:04	3	0.02	0	0	3744	31.06	401	3.73
HLA_B*27:05	6932	40.76	2192	4.01	1698	14.09	134	1.25
HLA_B*27:06	10	0.08	6	0.06	10	0.08	6	0.06
HLA_B*27:07	1	0.01	16	0.03	28	0.23	11	0.1
HLA_B*35:01	477	2.8	2713	4.97	199	1.65	276	2.57
HLA_B*35:02	60	0.35	372	0.68	10	0.08	17	0.16
HLA_B*35:03	127	0.75	713	1.31	45	0.37	83	0.77
HLA_B*35:05	0	0	0	0	23	0.19	20	0.19
HLA_B*35:08	22	0.13	205	0.38	4	0.03	6	0.06
HLA_B*37:01	119	0.7	771	1.41	73	0.61	122	1.13
HLA_B*38:01	131	0.77	854	1.56	22	0.18	42	0.39
HLA_B*38:02	0	0	0	0	164	1.36	242	2.25
HLA_B*39:01	120	0.71	568	1.04	121	1	235	2.19
HLA_B*39:05	0	0	0	0	10	0.08	14	0.13
HLA_B*39:06	82	0.48	401	0.73	0	0	0	0
HLA_B*39:10	0	0	4	0.01	0	0	0	0
HLA_B*39:24	0	0	13	0.02	1	0.01	1	0.01
HLA_B*40:01	835	4.91	2960	5.42	917	7.61	1115	10.37
HLA_B*40:02	135	0.79	570	1.04	145	1.2	226	2.1
HLA_B*40:03	0	0	0	0	4	0.03	22	0.2
HLA_B*40:06	7	0.04	15	0.03	190	1.58	379	3.53
HLA_B*41:01	28	0.16	171	0.31	8	0.07	7	0.07
HLA_B*41:02	35	0.21	214	0.39	2	0.02	2	0.02
HLA_B*42:01	2	0.01	5	0.01	0	0	0	0
HLA_B*42:02	2	0.01	10	0.02	0	0	0	0
HLA_B*44:02	1174	6.9	5746	10.52	38	0.32	72	0.67
HLA_B*44:03	526	3.09	2855	5.23	127	1.05	215	2
HLA_B*44:04	3	0.02	32	0.06	0	0	0	0
HLA_B*44:05	29	0.17	144	0.26	0	0	0	0
HLA_B*45:01	70	0.41	315	0.58	7	0.06	12	0.11
HLA_B*46:01	0	0	3	0.01	715	5.93	1027	9.55
HLA_B*47:01	38	0.22	165	0.3	0	0	1	0.01
HLA_B*48:01	0	0	12	0.02	141	1.17	221	2.06
HLA_B*49:01	110	0.65	716	1.31	9	0.07	15	0.14
HLA_B*50:01	106	0.62	544	1	33	0.27	52	0.48
HLA_B*50:02	6	0.04	26	0.05	0	0	0	0
HLA_B*51:01	441	2.59	2392	4.38	418	3.47	607	5.65
HLA_B*51:02	0	0	0	0	81	0.67	145	1.35
HLA_B*51:05	3	0.02	15	0.03	0	0	0	0
HLA_B*51:07	3	0.02	16	0.03	6	0.05	7	0.07
HLA_B*51:08	6	0.04	51	0.09	0	0	0	0
HLA_B*51:09	7	0.04	46	0.08	0	0	0	0
HLA_B*52:01	80	0.47	403	0.74	189	1.57	284	2.64
HLA_B*53:01	19	0.11	177	0.32	0	0	0	0
HLA_B*54:01	0	0	0	0	266	2.21	382	3.55
HLA_B*55:01	232	1.36	1004	1.84	5	0.04	12	0.11
HLA_B*55:02	0	0	0	0	119	0.99	249	2.32
HLA_B*56:01	31	0.18	307	0.56	38	0.32	57	0.53
HLA_B*56:03	0	0	0	0	8	0.07	5	0.05
HLA_B*57:01	294	1.73	2026	3.71	55	0.46	116	1.08
HLA_B*57:02	1	0.01	15	0.03	0	0	0	0
HLA_B*57:03	0	0	23	0.04	0	0	0	0
HLA_B*58:01	58	0.34	342	0.63	465	3.86	735	6.84
HLA_B*67:01	5	0.03	4	0.01	35	0.29	81	0.75
HLA_B*73:01	1	0.01	13	0.02	1	0.01	0	0

## Sheet: Table S5
Table S5: Credible causal variants identified for AS by SusiEx
Locus	CS_ID	CS_LENGTH	CS_PURITY	MAX_PIP_SNP	BP	REF_ALLELE	ALT_ALLELE	REF_FRQ	BETA	SE	abs(LOG10P))	MAX_PIP	POST-HOC_PROB_POP1	POST-HOC_PROB_POP2	POST-HOC_PROB_POP3	POST-HOC_PROB_POP4
chr1_150277294_150777294_ADAMTSL4	1	7	0.692072	rs12124948	150527294	C,C,C,C	T,T,T,T	0.5862,0.5583,0.6508,0.6698	-0.0233055,-0.0363293,-0.0381153,0.000997936	0.0052188,0.0105764,0.0341549,0.0438637	5.09793,3.22719,0.57767,0.00795529	0.532001	0.987884	0.970776	0.251767	0.301031
chr1_154182877_154682877_IL6R	2	19	0.949613	rs12730935	154419892	G,NA,NA,NA	A,NA,NA,NA	0.6017,NA,NA,NA	0.0488971,NA,NA,NA	0.00525041,NA,NA,NA	19.9057,NA,NA,NA	0.201388	0.999951	0.402399	0.499943	0.499973
chr1_154182877_154682877_IL6R	1	38	0.888355	rs6690230	154432877	G,G,NA,NA	C,C,NA,NA	0.6034,0.7714,NA,NA	-0.0507823,-0.00428529,NA,NA	0.00525424,0.0125071,NA,NA	21.3721,0.135562,NA,NA	0.151281	0.999842	0.255732	0.499715	0.499614
chr1_161228859_161728859_FCGR2A	1	2	0.996598	rs1801274	161479745	G,A,A,A	A,G,G,G	0.5133,0.6703,0.6243,0.6136	-0.0450243,0.0216802,0.00162035,0.0543957	0.00514248,0.0111722,0.0336199,0.0423648	17.6916,1.28138,0.0170237,0.700825	0.610363	1	0.62615	0.239299	0.371554
chr1_169478137_169978137_SELE	1	8	0.995884	rs2420505	169728137	A,A,NA,NA	G,G,NA,NA	0.8037,0.5207,NA,NA	-0.0350916,-0.0233644,NA,NA	0.00647115,0.0105132,NA,NA	7.23151,1.58075,NA,NA	0.152739	0.9997	0.629027	0.467607	0.469796
chr1_200627850_201127850_C1orf106	1	7	0.999205	rs41299637	200877850	T,NA,T,T	G,NA,G,G	0.7242,NA,0.8004,0.8204	0.0801086,NA,0.0540107,0.0424494	0.00575125,NA,0.0407362,0.0537403	43.3738,NA,0.733101,0.366949	0.225985	1	0.5	0.357725	0.299994
chr1_206705041_207205041_IL10	1	1	1	rs55705316	206933517	T,T,T,T	G,G,G,G	0.8511,0.98119,0.8839,0.91447	-0.0393203,-0.106334,-0.140056,0.146257	0.00722023,0.0386601,0.0508272,0.0737602	7.28771,2.22542,2.23212,1.32439	0.966192	0.999571	0.785116	0.808025	0.58224
chr1_25055114_25555114_RUNX3	1	31	0.966473	rs6600247	25305114	C,C,C,C	T,T,T,T	0.5037,0.715,0.5854,0.62	0.0457257,0.0356183,0.0743037,0.0304751	0.0051408,0.0116348,0.0330501,0.042499	18.2322,2.65692,1.60972,0.324841	0.174993	1	0.969468	0.740545	0.267594
chr1_67455958_67955958_IL23R	3	1	1	rs76418789	67648596	NA,G,NA,NA	NA,A,NA,NA	NA,0.95575,NA,NA	NA,0.118763,NA,NA	NA,0.0255391,NA,NA	NA,5.47948,NA,NA	0.996103	0.495143	0.989042	0.498353	0.500356
chr1_67455958_67955958_IL23R	2	2	0.99601	rs7539625	67672765	G,A,G,G	A,G,A,A	0.6905,0.5382,0.5703,0.5362	-0.0679414,0.0362074,-0.0774221,-0.101611	0.00556002,0.010535,0.0328912,0.0413654	33.6122,3.23026,1.73099,1.85284	0.625639	1	0.999995	0.84513	0.58456
chr1_67455958_67955958_IL23R	1	8	0.983229	rs11209026	67705958	G,NA,NA,NA	A,NA,NA,NA	0.93797,NA,NA,NA	0.168767,NA,NA,NA	0.010656,NA,NA,NA	55.7675,NA,NA,NA	0.426352	1	0.5	0.499994	0.49999
chr1_67455958_67955958_IL23R	4	13	0.982622	rs41313260	67706309	C,C,C,C	T,T,T,T	0.726,0.96887,0.7842,0.7915	0.0344749,0.0869814,0.0100035,0.0868408	0.00576295,0.0302421,0.0395799,0.0507794	8.65719,2.3952,0.0966557,1.0593	0.123466	0.999999	0.794548	0.30619	0.281453
chr10_101038347_101538347_NKX2-3	1	34	0.967506	rs7085798	101288347	A,A,A,A	C,C,C,C	0.5075,0.5383,0.5027,0.5128	-0.0432982,-0.0226659,0.000324458,0.00909316	0.00514124,0.0105352,0.032565,0.0412704	16.4307,1.50251,0.00346623,0.0832234	0.194252	1	0.701869	0.248998	0.243978
chr10_64253349_64753349_ADO	1	25	0.970572	rs224063	64503349	T,G,T,T	G,T,G,G	0.5883,0.5998,0.5477,0.5677	-0.0290173,0.0264297,-0.00439929,-0.126873	0.00522275,0.0107199,0.0327137,0.0416403	7.55893,1.86381,0.0491367,2.63596	0.140628	1	0.997819	0.253465	0.941266
chr10_80792475_81292475_ZMIZ1	1	4	0.862656	rs1250573	81042475	G,G,G,G	A,A,A,A	0.6837,0.577,0.7911,0.8081	0.0464634,0.043596,0.0550621,-0.0118759	0.00552721,0.010631,0.0400525,0.0523837	16.3735,4.38544,0.771576,0.0858421	0.870949	1	0.998258	0.427351	0.271264
chr10_90505056_91005056_FAS	1	18	0.793519	rs2031610	90754487	T,C,T,T	C,T,C,C	0.6324,0.6035,0.552,0.5719	-0.0338079,0.0476925,-0.0503455,-0.171669	0.00533096,0.0107368,0.032742,0.0416901	9.64381,5.04995,0.9061,4.41722	0.174994	1	0.99965	0.486615	0.985154
chr11_128146738_128646738_ETS1	4	2	1	rs73029056	128342944	G,G,G,G	A,A,A,A	0.8369,0.795,0.7834,0.7779	-0.0338122,-0.0328925,-0.01511,-0.0259596	0.00695705,0.0130099,0.0395269,0.0496284	5.93068,1.94071,0.153502,0.221185	0.507188	0.989533	0.812506	0.255015	0.266162
chr11_128146738_128646738_ETS1	1	5	0.977931	rs7117118	128396738	A,A,A,A	G,G,G,G	0.7815,0.95817,0.7646,0.7919	-0.0492935,-0.0817342,-0.102263,0.0135815	0.00622012,0.0262343,0.038379,0.0508153	14.6412,2.73613,2.113,0.10278	0.551817	1	0.905335	0.885132	0.252296
chr11_128146738_128646738_ETS1	2	6	0.998636	rs12225641	128192296	A,A,NA,NA	T,T,NA,NA	0.648,0.6613,NA,NA	-0.0397456,-0.041599,NA,NA	0.00538183,0.0110976,NA,NA	12.8173,3.7498,NA,NA	0.242395	1	0.995426	0.5	0.5
chr11_128146738_128646738_ETS1	3	9	0.595371	rs12795702	128156314	G,A,G,G	A,G,A,A	0.6263,0.7645,0.5331,0.5366	-0.0347026,4.50989e-05,-0.0381279,-0.0140298	0.00531295,0.012378,0.0326361,0.0413678	10.1869,0.00126436,0.614938,0.134009	0.44256	0.99559	0.261359	0.355635	0.259819
chr11_70909764_71409764_NADSYN1	1	52	0.95917	rs28364617	71159764	G,T,G,G	T,G,T,T	0.7671,0.5549,0.6042,0.5536	-0.0331967,0.0441715,0.015635,0.0247934	0.00608104,0.0105681,0.0332955,0.041496	7.31995,4.53476,0.194734,0.259495	0.0796026	0.999987	0.995838	0.255806	0.299651
chr12_6190009_6690009_TNFRSF1A	1	3	0.973862	rs1800693	6440009	T,T,T,T	C,C,C,C	0.5976,0.8803,0.6013,0.6221	0.048405,-0.00510899,0.0507997,0.0602484	0.00524149,0.0161797,0.0332541,0.0425449	19.5878,0.123678,0.897543,0.804814	0.722395	1	0.291766	0.396369	0.467451
chr12_6190009_6690009_TNFRSF1A	2	5	0.835322	rs4020660	6511657	G,NA,G,G	A,NA,A,A	0.525,NA,0.5941,0.5813	-0.0417372,NA,-0.0128749,0.0308475	0.0051471,NA,0.033157,0.0418133	15.2917,NA,0.156273,0.336609	0.814243	1	0.437738	0.221326	0.293809
chr13_99559175_100059175_UBAC2-AS1	1	4	0.940036	rs2390194	99809175	G,G,NA,NA	A,A,NA,NA	0.5328,0.6286,NA,NA	-0.026085,-0.0241986,NA,NA	0.00515175,0.0108699,NA,NA	6.3851,1.58502,NA,NA	0.576874	0.992604	0.456899	0.381023	0.36401
chr14_88221141_88721141_GPR65	1	15	0.891407	rs28667727	88471141	T,T,T,T	C,C,C,C	0.90923,0.8577,0.8913,0.88	-0.0550358,-0.0349654,-0.023822,-0.0578811	0.00894707,0.0150336,0.0523103,0.0634796	9.11426,1.69835,0.187874,0.441446	0.146767	0.999987	0.748818	0.26568	0.332948
chr15_63539952_64039952_CA12-USP3	1	12	0.995204	rs62011287	63791228	A,NA,A,A	G,NA,G,G	0.6442,NA,0.6562,0.6762	-0.0290296,NA,-0.0673857,-0.163936	0.00536878,NA,0.0342802,0.0440849	7.19351,NA,1.30689,3.69833	0.139043	0.999968	0.491562	0.610198	0.98868
chr16_28369132_28869132_IL27	2	1	1	rs12448482	28838073	G,G,NA,NA	A,A,NA,NA	0.6517,0.78,NA,NA	0.0435751,0.0268029,NA,NA	0.00539496,0.0126787,NA,NA	15.178,1.46199,NA,NA	0.972441	0.991971	0.560062	0.489068	0.481449
chr16_28369132_28869132_IL27	1	85	0.763103	rs4149406	28607070	A,A,A,A	G,G,G,G	0.6209,0.90068,0.6938,0.7494	-0.049945,-0.0327802,0.045457,-0.0679692	0.00529787,0.0175602,0.035326,0.0476013	20.3762,1.20803,0.702965,0.814389	0.0500167	1	0.539571	0.413389	0.413784
chr16_3043407_3543407_MEFV	1	1	1	rs61752717	3293407	NA,NA,T,NA	NA,NA,C,NA	NA,NA,0.96368,NA	NA,NA,-0.604819,NA	NA,NA,0.0870312,NA	NA,NA,11.4357,NA	0.998515	0.499997	0.499997	0.999993	0.499994
chr16_49916602_50416602_HEATR3	1	31	0.569353	rs12934054	50198251	A,A,A,A	C,C,C,C	0.7661,0.7296,0.7431,0.763	0.0362497,0.0276263,0.0618583,-0.0737855	0.00607199,0.0118246,0.0372656,0.0485098	8.62474,1.71054,1.01355,0.891946	0.109949	0.999988	0.851909	0.563694	0.323224
chr16_79794738_80294738_RP11-148M9.1	1	34	0.928539	rs12921341	80040583	T,G,T,T	G,T,G,G	0.5704,0.5573,0.5777,0.6085	-0.0298075,0.0372488,0.00583979,-0.0758015	0.00519238,0.0105739,0.032965,0.0422639	8.02534,3.36942,0.06581,1.13734	0.1095	0.99999	0.979961	0.270238	0.584099
chr17_25846597_26346597_NOS2	1	5	0.988484	rs2297518	26096597	G,G,G,G	A,A,A,A	0.8026,0.8431,0.7458,0.7472	-0.0470506,-0.065521,-0.142536,-0.147451	0.00645752,0.0144405,0.0373951,0.0474634	12.4964,5.24428,3.85992,2.72301	0.787945	1	0.999804	0.990772	0.871705
chr17_25846597_26346597_NOS2	2	41	0.970096	rs2779257	26144086	C,C,C,C	A,A,A,A	0.6275,0.7193,0.5798,0.5711	-0.0426447,-0.0483717,-0.0582288,-0.105988	0.00531641,0.0116885,0.0329873,0.0416804	14.9804,4.45628,1.11052,1.95884	0.0750715	1	0.997536	0.367034	0.578687
chr17_45536452_46036452_TBKBP1	1	7	0.853652	rs4794057	45786452	T,C,C,T	C,T,T,C	0.5249,0.5289,0.5072,0.537	0.0408543,-0.0406345,-0.0681377,0.0868173	0.00514704,0.0105218,0.0325679,0.0413703	14.6852,3.94887,1.43863,1.44542	0.327795	1	0.975227	0.209633	0.833318
chr17_61910131_62410131_ERN1	1	8	0.989816	rs3744283	62160131	G,G,G,G	C,C,C,C	0.8408,0.6534,0.8327,0.8302	-0.0402407,-0.0544491,0.0236013,0.0318721	0.0070254,0.0110365,0.0436236,0.0549422	7.99274,6.09289,0.230258,0.250383	0.447174	0.999999	0.999859	0.336354	0.305062
chr18_12555388_13055388_PTPN2	1	40	0.596794	rs12967678	12805388	G,G,G,G	A,A,A,A	0.8831,0.8431,0.92391,0.90766	-0.0399677,-0.0533147,-0.0263393,-0.0243154	0.00799975,0.0144405,0.0614095,0.071254	6.23288,3.65271,0.175232,0.134946	0.0723405	0.998798	0.990588	0.361677	0.381952
chr19_10213118_10713118_TYK2	2	1	1	rs34536443	10463118	G,NA,G,G	C,NA,C,C	0.95875,NA,0.97481,0.97957	0.109546,NA,0.263917,0.167404	0.0129248,NA,0.103906,0.145819	16.6312,NA,1.95521,0.600397	0.991826	1	0.5	0.875277	0.267546
chr19_10213118_10713118_TYK2	1	25	0.583902	rs35452057	10573816	G,G,G,G	A,A,A,A	0.8114,0.8748,0.8327,0.8217	0.0566057,0.0333462,0.00850553,0.106475	0.00657053,0.01587,0.0436236,0.0538932	17.1556,1.44827,0.0729314,1.31703	0.357174	0.999232	0.53338	0.245619	0.668806
chr19_35963072_36463072_KMT2B	1	21	0.791853	rs28373672	36213072	A,A,A,A	G,G,G,G	0.763,0.7928,0.7163,0.6991	-0.0301656,-0.0267257,-0.0758439,-0.100438	0.00604439,0.0129586,0.0361191,0.0449765	6.22063,1.40704,1.4468,1.59276	0.468951	0.998553	0.3177	0.542342	0.753734
chr2_102429286_102929286_IL1R1	2	3	0.564381	rs58340896	102691535	G,G,NA,NA	C,C,NA,NA	0.98125,0.8911,NA,NA	0.0650497,0.0856703,NA,NA	0.0189495,0.01686,NA,NA	3.22373,6.42609,NA,NA	0.886455	0.791505	0.967554	0.47444	0.45703
chr2_102429286_102929286_IL1R1	1	4	0.984776	rs4851529	102647300	G,G,G,G	A,A,A,A	0.6162,0.5059,0.6103,0.6153	0.0393194,0.0139525,0.0416601,-0.0031608	0.00528537,0.010505,0.033387,0.0423996	12.9947,0.734906,0.673446,0.0266069	0.621157	1	0.389792	0.400786	0.263588
chr2_111561665_112061665_ACOXL	2	4	0.802053	rs4848370	111811665	C,T,C,C	T,C,T,T	0.7272,0.5202,0.7375,0.726	-0.0350571,0.0282583,-0.0599955,-0.0476989	0.00577085,0.0105128,0.0370057,0.0462511	8.90626,2.14337,0.97896,0.519419	0.718974	0.99826	0.572208	0.381473	0.288473
chr2_111561665_112061665_ACOXL	1	17	0.913155	rs12476878	111602974	A,A,A,A	G,G,G,G	0.6789,0.6965,0.6371,0.6498	0.0341827,0.0209014,0.0134508,0.103545	0.00550511,0.0114234,0.0338623,0.0432432	9.27384,1.17202,0.160393,1.77874	0.104772	0.999864	0.474156	0.251049	0.673982
chr2_181788445_182288445_UBE2E3	1	1	1	rs11902472	181990859	A,A,A,A	G,G,G,G	0.6254,0.8683,0.6819,0.7034	0.0280003,0.0387554,-0.0748102,-0.00401579	0.00531038,0.0155312,0.03496,0.0451626	6.8716,1.90017,1.48993,0.0319157	0.999968	1	0.899142	0.763103	0.238298
chr2_231589516_232089516_SPATA3-AS1	1	4	0.995421	rs3106083	231839516	A,A,NA,NA	G,G,NA,NA	0.5959,0.95558,NA,NA	-0.0357309,-0.00408843,NA,NA	0.0052379,0.0254924,NA,NA	11.0456,0.0591931,NA,NA	0.430254	1	0.230228	0.49931	0.499912
chr2_241318326_241818326_GPR35	1	1	1	rs34236350	241568326	C,C,C,C	T,T,T,T	0.8195,0.693,0.864,0.8796	-0.0687364,-0.0574977,-0.0442162,-0.0385824	0.00668306,0.0113867,0.0474994,0.0633885	24.0851,6.35373,0.453562,0.265404	0.981033	1	0.99998	0.326206	0.264907
chr2_62310332_62810332_B3GNT2	1	1	1	rs4672505	62560332	G,G,G,G	A,A,A,A	0.6188,0.5393,0.5589,0.5609	-0.104621,-0.106021,-0.107581,-0.205774	0.00529221,0.0105368,0.0327928,0.0415663	86.2585,23.0897,2.98475,6.13064	0.97272	1	1	0.971314	0.999929
chr2_85683367_86183367_GNLY	1	6	0.705116	rs17026540	85913162	C,T,C,C	T,C,T,T	0.5817,0.5298,0.5456,0.5128	-0.0368254,0.00593043,-0.0220484,-0.0317827	0.00521069,0.0105229,0.0327008,0.0412704	11.8013,0.241811,0.300897,0.355329	0.660519	0.999999	0.262018	0.293093	0.307132
chr20_62018333_62518333_STMN3	1	9	0.695765	rs71325458	62268333	A,NA,A,A	G,NA,G,G	0.98224,NA,0.97534,0.95574	0.0985407,NA,0.0951541,0.217966	0.0194607,NA,0.104988,0.100298	6.38566,NA,0.437993,1.52629	0.630984	0.952069	0.472998	0.336476	0.592595
chr21_40216744_40716744_21q22	1	8	0.996066	rs2836883	40466744	G,G,G,G	A,A,A,A	0.7367,0.8,0.7672,0.7753	0.0632815,0.0531268,0.0645416,0.0622789	0.00583604,0.0131303,0.0385273,0.0494231	26.6681,4.28339,1.02738,0.682717	0.221548	1	0.997723	0.504372	0.410017
chr22_21720810_22220810_UBE2L3	1	42	0.725227	rs4821114	21970810	G,G,G,G	C,C,C,C	0.8099,0.6085,0.7656,0.7511	-0.0438505,-0.0292026,-0.00668594,-0.100337	0.00655061,0.0107606,0.0384357,0.0477095	10.6635,2.17712,0.0645413,1.45027	0.110814	1	0.625205	0.277671	0.523049
chr22_45450514_45950514_FAM118A	1	32	0.792463	rs6007580	45700514	G,G,G,G	A,A,A,A	0.7411,0.5257,0.6418,0.6213	0.0348743,0.045912,0.057098,0.112016	0.00586792,0.0105181,0.0339587,0.0425273	8.55363,4.89586,1.03298,2.07371	0.124772	0.999999	0.997362	0.460609	0.715755
chr22_50721047_51221047_ODF3B	1	8	0.950735	rs361725	50971047	C,C,C,C	T,T,T,T	0.6285,0.7229,0.5896,0.6238	-0.0257107,-0.0311169,-0.108609,-0.0399331	0.00531933,0.0117348,0.0331003,0.0425828	5.87229,2.0964,2.98565,0.457972	0.583912	0.996316	0.863777	0.888814	0.370168
chr3_159387678_159887678_IL12A	1	5	0.650474	rs76830965	159637678	C,NA,C,C	A,NA,A,A	0.8859,NA,0.94274,0.96213	0.0438098,NA,0.0615233,0.0166786	0.00808451,NA,0.0700797,0.108069	7.22229,NA,0.420221,0.0568285	0.466131	0.990531	0.485304	0.333461	0.253077
chr3_169236508_169736508_TERC	1	16	0.968229	rs35446936	169486508	G,A,NA,NA	A,G,NA,NA	0.7589,0.5357,NA,NA	0.0363335,-0.0363222,NA,NA	0.00600894,0.0105311,NA,NA	8.82987,3.24981,NA,NA	0.128295	0.999999	0.984266	0.5	0.499998
chr3_187875120_188375120_LPP	1	47	0.756148	rs13093110	188125120	C,T,C,C	T,C,T,T	0.5425,0.6125,0.5265,0.5285	-0.0241099,0.0269247,-0.0667757,-0.0326767	0.00515933,0.0107807,0.0326103,0.041324	5.52762,1.90284,1.39157,0.367448	0.15256	0.995346	0.544742	0.405385	0.283823
chr3_27533015_28033015_EOMES	1	12	0.772189	rs12497690	27795397	A,A,A,C	C,C,C,A	0.6152,0.5207,0.5265,0.5545	-0.0409164,-0.0251785,-0.0324369,0.0855427	0.00528279,0.0105132,0.0326103,0.0415041	14.0204,1.77927,0.494999,1.40564	0.300229	1	0.808079	0.340753	0.508252
chr3_28036802_28536802_AZI2	1	13	0.87353	rs74533039	28286802	C,C,C,C	G,G,G,G	0.83,0.5458,0.816,0.8281	0.0426682,0.0384179,0.0690029,0.0727887	0.00684266,0.0105486,0.0420204,0.0546747	9.34675,3.56779,0.99756,0.737338	0.12322	1	0.973515	0.476274	0.400659
chr3_45745708_46245708_FYCO1	1	2	1	rs1873618	46175976	T,NA,T,T	C,NA,C,C	0.7677,NA,0.8587,0.886	-0.037327,NA,0.0241687,0.0150757	0.00608651,NA,0.0467436,0.0649078	9.06361,NA,0.218156,0.0881321	0.7465	1	0.499997	0.272402	0.257416
chr3_49213287_49713287_MST1	1	44	0.983479	rs11130202	49566715	C,T,NA,NA	T,C,NA,NA	0.5732,0.92436,NA,NA	0.0297653,-0.0173076,NA,NA	0.00519665,0.0198627,NA,NA	7.99245,0.416172,NA,NA	0.0607343	0.999991	0.326473	0.455839	0.448537
chr4_80657288_81157288_ANTXR2	1	14	0.994987	rs4610280	80907288	A,A,A,A	G,G,G,G	0.5406,0.91558,0.5379,0.5447	0.0493637,0.0599797,0.020432,0.0901496	0.00515769,0.0188914,0.0326584,0.0414227	20.9747,2.82435,0.274448,1.52973	0.126396	1	0.955823	0.282879	0.618383
chr5_1034135_1534135_TERT	1	4	0.957247	rs4449583	1284135	C,C,NA,NA	T,T,NA,NA	0.6642,0.6339,NA,NA	-0.0331192,-0.0332894,NA,NA	0.00544251,0.0109024,NA,NA	8.9345,2.64537,NA,NA	0.502011	0.999998	0.90816	0.425624	0.432182
chr5_134201317_134701317_CTC-276P9.2	1	12	0.993116	rs17659254	134451317	C,C,C,C	G,G,G,G	0.6672,0.7998,0.6978,0.6898	-0.0344103,0.0125383,-0.0426298,-0.0214228	0.00545468,0.0131254,0.035457,0.0445947	9.54987,0.46924,0.639694,0.200004	0.544973	0.999962	0.315827	0.373387	0.255978
chr5_141260448_141760448_NDFIP1	1	53	0.988223	rs6580228	141510448	T,T,T,T	C,C,C,C	0.6229,0.6724,0.6455,0.6715	0.0279983,0.0225768,0.0368128,0.0749149	0.00530336,0.0111905,0.0340375,0.0439213	6.88725,1.36008,0.553683,1.05517	0.17873	0.997037	0.577705	0.304064	0.531387
chr5_158576792_159076792_IL12B	1	3	0.976316	rs6871626	158826792	C,C,C,C	A,A,A,A	0.6579,0.6759,0.6633,0.6945	-0.0443191,-0.018408,0.0163958,-0.0697909	0.00541792,0.0112216,0.0344538,0.0447842	15.5473,0.996027,0.1978,0.923934	0.744749	1	0.553922	0.258855	0.508958
chr5_35629156_36129156_IL7R	1	13	0.883489	rs6881706	35879156	G,G,G,G	T,T,T,T	0.737,0.8245,0.8059,0.7877	0.0399579,0.0419749,0.00327055,-0.000504956	0.00583817,0.013807,0.0411681,0.0504441	11.1142,2.62618,0.0284089,0.00348257	0.211891	1	0.87749	0.229248	0.264439
chr5_40116593_40616593_PTGER4	1	31	0.978807	rs979256	40304217	T,T,T,T	C,C,C,C	0.8308,0.7159,0.8417,0.8055	0.0333777,-0.0353297,-0.0684794,0.00558198	0.00685552,0.0116459,0.0446062,0.0521163	5.94957,2.6169,0.904012,0.0387191	0.0695967	0.987792	0.949469	0.495853	0.271855
chr5_95871152_96371152_ERAP1	1	1	1	rs2032890	96121152	A,A,A,A	C,C,C,C	0.7081,0.95439,0.7643,0.7574	0.117688,0.106862,0.106138,0.202152	0.00565359,0.0251734,0.0383621,0.0481236	95.5128,4.66042,2.24702,4.57493	0.997629	1	0.999553	0.399319	0.673607
chr5_95871152_96371152_ERAP1	4	1	1	rs152465	96123580	G,G,G,G	T,T,T,T	0.669,0.7908,0.7418,0.7898	0.0639627,0.0366419,0.100555,-0.0124984	0.00546213,0.0129128,0.0372043,0.050628	30.947,2.34249,2.16266,0.094198	0.972425	0.999923	0.253181	0.700002	0.198931
chr5_95871152_96371152_ERAP1	3	2	0.920927	rs27619	96118065	T,T,T,T	G,G,G,G	0.5803,0.559,0.5148,0.5111	-0.0164056,0.0423623,-0.0103794,-0.0117305	0.00520826,0.0105781,0.0325788,0.041267	2.78696,4.20694,0.124919,0.11002	0.915304	1	0.996865	0.228613	0.140903
chr5_95871152_96371152_ERAP1	2	12	0.998641	rs26510	96125910	T,C,T,T	C,T,C,C	0.6424,0.5358,0.583,0.5579	-0.105261,0.0621303,-0.0899143,-0.2477	0.00536275,0.0105313,0.0330226,0.0415363	85.052,8.43848,2.1889,8.60738	0.179009	1	0.995889	0.777391	0.999997
chr6_16413990_16913990_ATXN1	1	9	0.839596	rs6459481	16663990	G,G,G,G	A,A,A,A	0.6046,0.8397,0.6371,0.6681	0.0310117,0.018619,0.005422,-0.0504139	0.00525698,0.0143155,0.0338623,0.0438068	8.43725,0.713569,0.0590915,0.602399	0.230279	0.999923	0.422755	0.242793	0.370717
chr7_100037495_100537495_GIGYF1	1	22	0.763927	rs221800	100288552	C,C,C,C	T,T,T,T	0.8864,0.93935,0.94008,0.95787	-0.043568,-0.0313916,-0.02945,-0.0123627	0.00809999,0.0220042,0.0686034,0.102687	7.12496,0.813357,0.175405,0.0437484	0.0646962	0.999006	0.283962	0.247148	0.253954
chr7_16949229_17449229_AHR	1	16	0.817864	rs17701498	17213072	G,T,T,T	T,G,G,G	0.5232,0.8318,0.5334,0.586	-0.0380764,-0.0195338,0.0290789,0.0349524	0.0051462,0.0140414,0.0326374,0.041881	12.8624,0.784683,0.428354,0.393659	0.130581	1	0.272204	0.293477	0.308477
chr7_50103192_50603192_IKZF1	1	1	1	rs6583441	50361874	A,A,A,A	T,T,T,T	0.5116,0.525,0.5398,0.5345	0.0389177,-0.00453604,0.0278654,0.0182181	0.00514204,0.0105174,0.0326681,0.0413554	13.4231,0.176358,0.404869,0.180747	0.994806	1	0.246807	0.312989	0.213154
chr9_117325079_117825079_TNFSF15	1	13	0.835894	rs13300483	117643362	C,C,C,C	T,T,T,T	0.7544,0.746,0.7192,0.7166	-0.037385,0.0161928,0.0254249,-0.00960102	0.00597137,0.0120656,0.0362319,0.0457749	9.41652,0.745759,0.316189,0.078903	0.524279	0.999837	0.345815	0.249997	0.295759
chr9_135887106_136387106_ABO	1	28	0.965994	rs687289	136137106	G,G,G,G	A,A,A,A	0.6677,0.5696,0.5713,0.5877	-0.0270026,-0.0315563,-0.0673777,-0.0107222	0.00545673,0.0106075,0.0329007,0.0419065	6.12617,2.53301,1.39181,0.0979651	0.114345	0.999429	0.833206	0.673682	0.254193
chr9_139021850_139521850_CARD9	2	5	0.885688	rs28477913	139217787	G,NA,G,G	A,NA,A,A	0.5585,NA,0.5782,0.6072	-0.0245633,NA,-0.106122,0.00273769	0.00517621,NA,0.0329702,0.0422391	5.68177,NA,2.89022,0.0230442	0.640442	0.947866	0.49056	0.895113	0.259008
chr9_139021850_139521850_CARD9	1	34	0.629761	rs11793497	139271850	A,A,A,A	G,G,G,G	0.5712,0.7055,0.6829,0.7404	-0.0366699,-0.0326369,-0.0602167,-0.077091	0.00519358,0.0115224,0.0349895,0.0470523	11.7805,2.33546,1.0693,0.994238	0.223097	1	0.863615	0.376892	0.396305
chr9_98922627_99422627_ZNF367	1	31	0.892829	rs10118598	99172627	C,C,NA,NA	T,T,NA,NA	0.8284,0.98601,NA,NA	-0.0415134,-0.0260463,NA,NA	0.00681726,0.0447182,NA,NA	8.94578,0.251609,NA,NA	0.138859	0.999987	0.24807	0.430372	0.450443

## Sheet: Table S6
Table S6: Heritability and bias estimated by LDSC.
	LDSC results
	Liability scale heritability			Intercept		Inflation ratio
Ancestry	Estimate	S.E.	Lambda GC (common SNPs)	Estimate	S.E.	Estimate	S.E.
EUR	0.1739	0.0167	1.2177	1.0548	0.0083	0.1722	0.0263
EAS	0.1104	0.015	1.1197	1.0548	0.0058	0.4288	0.0457

## Sheet: Table S7
Table S7: Co-heritability estimated by LDSC
rg	se	z	p	h2_obs	h2_obs_se	h2_int	h2_int_se	gcov_int	gcov_int_se	phenotype	N	NCases	NControls	Cohort	URL	Notes	p2	p1
0.5452	0.04346	12.54	4.26e-36	1.21	0.1394	1.19	0.02952	0.08764	0.0107	Inflammatory bowel disease 2023	398668	45106	353562	IIBDGC	https://www.nature.com/articles/s41588-023-01384-0	https://www.ibdgenetics.org/	Liu_2022_IBD.tsv.rsid.ctg2	1741323351668EUR_vtg.txt.gz
0.5687	0.0473	12.02	2.74e-33	0.2858	0.03261	1.16	0.02004	0.1153	0.008812	Inflammatory bowel disease (IBD)	53124	25052	28072	IIBDGC + UK	ftp://ftp.sanger.ac.uk/pub/project/humgen/summary_statistics/human/2016-11-07/	https://www.nature.com/articles/ng.3760	IBD_Lange_et_al.ctgvl	1741323351668EUR_vtg.txt.gz
0.5568	0.04655	11.96	5.69e-33	0.833	0.1013	1.163	0.02106	0.1166	0.009579	IBD (EUR) 2023	59957	25042	34915	IIBDGC	https://www.ibdgenetics.org/	IBD suceptibility EUR GWAS Meta-analysis	ibd_EAS_EUR_SiKJEF_meta_IBD.TBL.txt.eur.ctg	1741323351668EUR_vtg.txt.gz
0.503	0.04654	10.81	3.17e-27	0.7562	0.1059	1.16	0.03127	0.06857	0.008848	Ulcerative Colitis 2023	375508	23252	352256	IIBDGC	null	https://www.nature.com/articles/s41588-023-01384-0	Liu_2022_UC.tsv.rsid.ctg2	1741323351668EUR_vtg.txt.gz
0.5274	0.05072	10.4	2.52e-25	0.2015	0.02879	1.13	0.0203	0.09171	0.007545	Ulcerative colitis (UC)	40438	12366	28072	IIBDGC + UK	ftp://ftp.sanger.ac.uk/pub/project/humgen/summary_statistics/human/2016-11-07/	https://www.nature.com/articles/ng.3760	UC_Lange_et_al.ctgvl	1741323351668EUR_vtg.txt.gz
0.5263	0.05181	10.16	3.04e-24	0.2804	0.03507	1.084	0.0134	0.01857	0.007581	Inflammatory bowel disease (IBD)	34652	12882	21770	IIBDGC	ftp://ftp.sanger.ac.uk/pub/consortia/ibdgenetics/iibdgc-trans-ancestry-filtered-summary-stats.tgz	https://www.nature.com/articles/ng.3359	IBD_Liu_et_al.tsv	1741323351668EUR_vtg.txt.gz
0.5153	0.05142	10.02	1.24e-23	0.4625	0.07119	1.133	0.02132	0.09251	0.008442	UC (EUR) 2023	45975	12366	33609	IIBDGC	https://www.ibdgenetics.org/	Ulcerative colitis suceptibility EUR GWAS Meta-analysis	ibd_EAS_EUR_SiKJEF_meta_UC.TBL.txt.eur.ctg	1741323351668EUR_vtg.txt.gz
0.5049	0.05059	9.979	1.88e-23	0.3972	0.04964	1.131	0.02279	0.09538	0.00916	Crohn's disease (CD)	40266	12194	28072	IIBDGC + UK	ftp://ftp.sanger.ac.uk/pub/project/humgen/summary_statistics/human/2016-11-07/	https://www.nature.com/articles/ng.3760	CD_Lange_et_al.ctgvl	1741323351668EUR_vtg.txt.gz
0.4925	0.04989	9.873	5.46e-23	0.772	0.1044	1.135	0.02527	0.09666	0.009063	CD (EUR) 2023	40266	12194	28072	IIBDGC	https://www.ibdgenetics.org/	Crohns disease suceptibility EUR GWAS Meta-analysis	ibd_EAS_EUR_SiKJEF_meta_CD.TBL.txt.eur.ctg	1741323351668EUR_vtg.txt.gz
0.4712	0.04805	9.807	1.05e-22	0.9735	0.1136	1.138	0.02487	0.07773	0.009848	Crohns 2023	367592	20873	346719	IIBDGC	https://www.nature.com/articles/s41588-023-01384-0	https://www.ibdgenetics.org/	Liu_2022_CD.tsv.rsid.ctg2	1741323351668EUR_vtg.txt.gz
0.4763	0.05854	8.137	4.07e-16	0.163	0.02633	1.072	0.01284	0.01671	0.006324	Ulcerative colitis (UC)	27432	6968	20464	IIBDGC	ftp://ftp.sanger.ac.uk/pub/consortia/ibdgenetics/iibdgc-trans-ancestry-filtered-summary-stats.tgz	https://www.nature.com/articles/ng.3359	UC_Liu_et_al.tsv	1741323351668EUR_vtg.txt.gz
0.4632	0.05801	7.985	1.41e-15	0.2479	0.033	1.052	0.01522	0.01092	0.007727	Crohn's disease (CD)	20883	5956	14927	IIBDGC	ftp://ftp.sanger.ac.uk/pub/consortia/ibdgenetics/iibdgc-trans-ancestry-filtered-summary-stats.tgz	https://www.nature.com/articles/ng.3359	CD_Liu_et_al.tsv	1741323351668EUR_vtg.txt.gz
0.5268	0.06745	7.811	5.67e-15	0.01024	0.001685	1.049	0.01084	0.01618	0.006593	Inflammatory bowel disease and other gasteroenteritis and colitis	446753	7837	438916	MVP	https://phenomics.va.ornl.gov/web/cipher/pheweb	https://www.science.org/doi/10.1126/science.adj2337	MVP_R4.1000G_AGR.Phe_555.EUR.GIA.dbGaP.txt.gz_ldsc	1741323351668EUR_vtg.txt.gz
0.5797	0.08777	6.605	3.99e-11	0.00606	0.001252	1.037	0.008679	0.01472	0.006385	Regional enteritis	450033	3402	446631	MVP	https://phenomics.va.ornl.gov/web/cipher/pheweb	https://www.science.org/doi/10.1126/science.adj2338	MVP_R4.1000G_AGR.Phe_555_1.EUR.GIA.dbGaP.txt.gz_ldsc	1741323351668EUR_vtg.txt.gz
0.4519	0.07097	6.367	1.92e-10	0.00659	0.001389	1.032	0.009671	0.01144	0.00609	Ulcerative colitis	447331	5229	442102	MVP	https://phenomics.va.ornl.gov/web/cipher/pheweb	https://www.science.org/doi/10.1126/science.adj2339	MVP_R4.1000G_AGR.Phe_555_2.EUR.GIA.dbGaP.txt.gz_ldsc	1741323351668EUR_vtg.txt.gz
0.3304	0.05236	6.311	2.78e-10	0.2845	0.04768	1.109	0.0181	0.005411	0.007403	IBD (EAS) 2023	29849	14393	15456	IIBDGC	https://www.ibdgenetics.org/	IBD suceptibility East Asian GWAS Meta-analysis	ibd_EAS_EUR_SiKJEF_meta_IBD.TBL.txt.eas.ctg	1741323351668EUR_vtg.txt.gz
0.247	0.04424	5.584	2.35e-08	0.01948	0.002305	1.119	0.01158	-0.004618	0.006439	Osteoporosis, osteopenia and pathological fracture	429500	37640	391860	MVP	https://phenomics.va.ornl.gov/web/cipher/pheweb	https://www.science.org/doi/10.1126/science.adj2688	MVP_R4.1000G_AGR.Phe_743.EUR.GIA.dbGaP.txt.gz_ldsc	1741323351668EUR_vtg.txt.gz
0.3183	0.0579	5.497	3.86e-08	0.191	0.04178	1.067	0.01309	0.003599	0.006358	UC (EAS) 2023	22318	6862	15456	IIBDGC	https://www.ibdgenetics.org/	Ulcerative colitis suceptibility East Asian GWAS Meta-analysis	ibd_EAS_EUR_SiKJEF_meta_UC.TBL.txt.eas.ctg	1741323351668EUR_vtg.txt.gz
0.2775	0.05336	5.201	1.98e-07	0.01575	0.002107	1.149	0.01532	-0.003956	0.008585	Psoriasis and related disorder	443794	16702	427092	MVP (EUR)	https://ftp.ncbi.nlm.nih.gov/dbgap/studies/phs002453/analyses/GIA/	Phe_696. PheCodes_Dermatological System	MVP_R4.1000G_AGR.Phe_696.EUR.GIA.dbGaP.txt.gz.ctg	1741323351668EUR_vtg.txt.gz
0.2776	0.05342	5.196	2.04e-07	0.01574	0.002106	1.149	0.01531	-0.003944	0.008583	Psoriasis and related disorder	443794	16702	427092	MVP	https://phenomics.va.ornl.gov/web/cipher/pheweb	https://www.science.org/doi/10.1126/science.adj2562	MVP_R4.1000G_AGR.Phe_696.EUR.GIA.dbGaP.txt.gz_ldsc	1741323351668EUR_vtg.txt.gz
0.2814	0.0547	5.144	2.69e-07	0.0154	0.002142	1.15	0.01539	-0.004269	0.008653	Psoriasis	444751	16283	428468	MVP (EUR)	https://ftp.ncbi.nlm.nih.gov/dbgap/studies/phs002453/analyses/GIA/	Phe_696_4. PheCodes_Dermatological System	MVP_R4.1000G_AGR.Phe_696_4.EUR.GIA.dbGaP.txt.gz.ctg	1741323351668EUR_vtg.txt.gz
0.2814	0.05479	5.137	2.79e-07	0.0154	0.002141	1.15	0.01538	-0.004255	0.008651	Psoriasis	444751	16283	428468	MVP	https://phenomics.va.ornl.gov/web/cipher/pheweb	https://www.science.org/doi/10.1126/science.adj2563	MVP_R4.1000G_AGR.Phe_696_4.EUR.GIA.dbGaP.txt.gz_ldsc	1741323351668EUR_vtg.txt.gz
0.264	0.05258	5.021	5.13e-07	0.0161	0.002107	1.147	0.01536	-0.003727	0.008444	Psoriasis vulgaris	444887	15635	429252	MVP (EUR)	https://ftp.ncbi.nlm.nih.gov/dbgap/studies/phs002453/analyses/GIA/	Phe_696_41. PheCodes_Dermatological System	MVP_R4.1000G_AGR.Phe_696_41.EUR.GIA.dbGaP.txt.gz.ctg	1741323351668EUR_vtg.txt.gz
0.2641	0.05264	5.016	5.26e-07	0.01609	0.002106	1.148	0.01536	-0.003711	0.008439	Psoriasis vulgaris	444887	15635	429252	MVP	https://phenomics.va.ornl.gov/web/cipher/pheweb	https://www.science.org/doi/10.1126/science.adj2564	MVP_R4.1000G_AGR.Phe_696_41.EUR.GIA.dbGaP.txt.gz_ldsc	1741323351668EUR_vtg.txt.gz
0.3121	0.06508	4.795	1.63e-06	0.00707	0.00118	1.042	0.008067	0.003029	0.005608	Noninfectious gastroenteritis	425906	14278	411628	MVP	https://phenomics.va.ornl.gov/web/cipher/pheweb	https://www.science.org/doi/10.1126/science.adj2344	MVP_R4.1000G_AGR.Phe_558.EUR.GIA.dbGaP.txt.gz_ldsc	1741323351668EUR_vtg.txt.gz
0.2522	0.05316	4.745	2.08e-06	0.3225	0.04749	1.094	0.02478	0.004657	0.007806	CD (EAS) 2023	22828	7372	15456	IIBDGC	https://www.ibdgenetics.org/	Crohns disease suceptibility East Asian GWAS Meta-analysis	ibd_EAS_EUR_SiKJEF_meta_CD.TBL.txt.eas.ctg	1741323351668EUR_vtg.txt.gz
0.2069	0.04379	4.726	2.3e-06	0.01818	0.002057	1.089	0.01111	-0.0007345	0.006249	Osteoporosis	442537	20117	422420	MVP	https://phenomics.va.ornl.gov/web/cipher/pheweb	https://www.science.org/doi/10.1126/science.adj2689	MVP_R4.1000G_AGR.Phe_743_1.EUR.GIA.dbGaP.txt.gz_ldsc	1741323351668EUR_vtg.txt.gz
0.2684	0.0568	4.725	2.3e-06	0.01332	0.001641	1.082	0.008783	-0.01002	0.006342	Rash and other nonspecific skin eruption	386085	45250	340835	MVP	https://phenomics.va.ornl.gov/web/cipher/pheweb	https://www.science.org/doi/10.1126/science.adj2545	MVP_R4.1000G_AGR.Phe_687_1.EUR.GIA.dbGaP.txt.gz_ldsc	1741323351668EUR_vtg.txt.gz
0.2683	0.05678	4.725	2.3e-06	0.01332	0.001641	1.082	0.008773	-0.01001	0.00635	Rash and other nonspecific skin eruption	386085	45250	340835	MVP (EUR)	https://ftp.ncbi.nlm.nih.gov/dbgap/studies/phs002453/analyses/GIA/	Phe_687_1. PheCodes_Dermatological System	MVP_R4.1000G_AGR.Phe_687_1.EUR.GIA.dbGaP.txt.gz.ctg	1741323351668EUR_vtg.txt.gz
0.4467	0.09583	4.661	3.15e-06	0.005367	0.001538	1.02	0.008575	0.003121	0.005919	Diagnoses - main ICD10: K51 Ulcerative colitis	361194	2143	359051	UK Biobank	https://docs.google.com/spreadsheets/d/1kvPoupSzsSFBNSztMzl04xMoSC3Kcx3CrjVf4yBmESU/edit?ts=5b5f17db#gid=227859291	PHESANT Transformation:NA-Notes:NA-Variable type:categorical-Phenotype ID:K51	categorical.K51.txt	1741323351668EUR_vtg.txt.gz
0.2565	0.05628	4.559	5.15e-06	0.01141	0.001608	1.125	0.009309	-0.01214	0.006229	Gastrointestinal hemorrhage	414123	47936	366187	MVP	https://phenomics.va.ornl.gov/web/cipher/pheweb	https://www.science.org/doi/10.1126/science.adj2396	MVP_R4.1000G_AGR.Phe_578.EUR.GIA.dbGaP.txt.gz_ldsc	1741323351668EUR_vtg.txt.gz
-0.1522	0.03346	-4.549	5.39e-06	0.05205	0.003014	1.414	0.01427	0.01986	0.007211	systolic blood pressure (SBP, minimum, inv-normal transformed)	425711	NA	NA	MVP	https://phenomics.va.ornl.gov/web/cipher/pheweb	https://www.science.org/doi/10.1126/science.adj2910	MVP_R4.1000G_AGR.Systolic_Min_INT.EUR.GIA.dbGaP.txt.gz_ldsc	1741323351668EUR_vtg.txt.gz
0.1875	0.04196	4.468	7.89e-06	0.01835	0.001594	1.086	0.008996	-0.004525	0.006383	Nausea and vomiting	411612	30059	381553	MVP	https://phenomics.va.ornl.gov/web/cipher/pheweb	https://www.science.org/doi/10.1126/science.adj2737	MVP_R4.1000G_AGR.Phe_789.EUR.GIA.dbGaP.txt.gz_ldsc	1741323351668EUR_vtg.txt.gz
0.2076	0.04656	4.458	8.25e-06	0.0188	0.001585	1.123	0.008619	-0.003029	0.006438	Symptoms involving digestive system	397925	60074	337851	MVP	https://phenomics.va.ornl.gov/web/cipher/pheweb	https://www.science.org/doi/10.1126/science.adj2351	MVP_R4.1000G_AGR.Phe_561.EUR.GIA.dbGaP.txt.gz_ldsc	1741323351668EUR_vtg.txt.gz
0.1949	0.04385	4.445	8.79e-06	0.01841	0.002057	1.087	0.01107	0.0007181	0.006333	Osteoporosis NOS	442709	19795	422914	MVP	https://phenomics.va.ornl.gov/web/cipher/pheweb	https://www.science.org/doi/10.1126/science.adj2690	MVP_R4.1000G_AGR.Phe_743_11.EUR.GIA.dbGaP.txt.gz_ldsc	1741323351668EUR_vtg.txt.gz
0.4434	0.1	4.434	9.26e-06	0.005112	0.001472	1.021	0.008033	0.002521	0.005751	Ulcerative colitis, NAS	361194	1903	359291	UK Biobank	https://docs.google.com/spreadsheets/d/1kvPoupSzsSFBNSztMzl04xMoSC3Kcx3CrjVf4yBmESU/edit?ts=5b5f17db#gid=227859291	PHESANT Transformation:NA-Notes:NA-Variable type:categorical-Phenotype ID:ULCERNAS	categorical.ULCERNAS.txt	1741323351668EUR_vtg.txt.gz
0.2206	0.0514	4.292	1.77e-05	0.01571	0.001618	1.096	0.009164	-0.007118	0.005701	Malaise and fatigue	390730	70908	319822	MVP	https://phenomics.va.ornl.gov/web/cipher/pheweb	https://www.science.org/doi/10.1126/science.adj2749	MVP_R4.1000G_AGR.Phe_798.EUR.GIA.dbGaP.txt.gz_ldsc	1741323351668EUR_vtg.txt.gz
0.4578	0.1078	4.247	2.17e-05	0.004078	0.001269	1.007	0.007205	0.01096	0.005844	Non-cancer illness code, self-reported: crohns disease	361141	1096	360045	UK Biobank	https://docs.google.com/spreadsheets/d/1kvPoupSzsSFBNSztMzl04xMoSC3Kcx3CrjVf4yBmESU/edit?ts=5b5f17db#gid=227859291	PHESANT Transformation:20002_0 || CAT-MUL-BINARY-VAR 1462 || Indicator name x135_0_0 || Remove indicator var NAs: 53 || Remove indicator var <0: 0 || Removed 0 examples != 1462 but with missing value (<0) || sample 360045/1096(361141) ||-Notes:Code for non-cancer illness. If the participant was uncertain of the type of illness they had had, then they described it to the interviewer (a trained nur…	binary.20002_1462.txt	1741323351668EUR_vtg.txt.gz
0.486	0.1145	4.244	2.19e-05	0.004241	0.00143	1.024	0.009168	0.0041	0.005877	Non-cancer illness code, self-reported: ulcerative colitis	361141	1916	359225	UK Biobank	https://docs.google.com/spreadsheets/d/1kvPoupSzsSFBNSztMzl04xMoSC3Kcx3CrjVf4yBmESU/edit?ts=5b5f17db#gid=227859291	PHESANT Transformation:20002_0 || CAT-MUL-BINARY-VAR 1463 || Indicator name x135_0_0 || Remove indicator var NAs: 53 || Remove indicator var <0: 0 || Removed 0 examples != 1463 but with missing value (<0) || sample 359225/1916(361141) ||-Notes:Code for non-cancer illness. If the participant was uncertain of the type of illness they had had, then they described it to the interviewer (a trained nur…	binary.20002_1463.txt	1741323351668EUR_vtg.txt.gz
0.3304	0.07789	4.242	2.22e-05	0.004395	0.001127	1.019	0.007948	-0.01425	0.005132	Adverse drug events and drug allergies	427891	8019	419872	MVP	https://phenomics.va.ornl.gov/web/cipher/pheweb	https://www.science.org/doi/10.1126/science.adj2826	MVP_R4.1000G_AGR.Phe_979.EUR.GIA.dbGaP.txt.gz_ldsc	1741323351668EUR_vtg.txt.gz
0.3083	0.07314	4.215	2.5e-05	0.005192	0.001129	1.027	0.007322	-0.002263	0.005503	Osteopenia or other disorder of bone and cartilage	436022	18113	417909	MVP	https://phenomics.va.ornl.gov/web/cipher/pheweb	https://www.science.org/doi/10.1126/science.adj2693	MVP_R4.1000G_AGR.Phe_743_9.EUR.GIA.dbGaP.txt.gz_ldsc	1741323351668EUR_vtg.txt.gz
0.2006	0.04781	4.196	2.72e-05	0.04665	0.004844	1.012	0.007913	-0.01495	0.005248	Substances taken for depression: Medication prescribed to you (for at least two weeks)	117763	28351	89412	UK Biobank	https://docs.google.com/spreadsheets/d/1kvPoupSzsSFBNSztMzl04xMoSC3Kcx3CrjVf4yBmESU/edit?ts=5b5f17db#gid=227859291	PHESANT Transformation:20546_0 || CAT-MUL-BINARY-VAR 3 || Indicator name x20446_0_0 || Remove indicator var NAs: 243128 || Remove indicator var <0: 303 || Removed 0 examples != 3 but with missing value (<0) || sample 89412/28351(117763) ||-Notes:Question asked: Did you ever try the following for these problems? (tick all that apply) Participant was offered a set of options which have been combine…	binary.20546_3.txt	1741323351668EUR_vtg.txt.gz
0.1543	0.03771	4.092	4.28e-05	0.04473	0.002437	1.208	0.01297	-0.005467	0.007066	Shortness of breath	391922	90148	301774	MVP	https://phenomics.va.ornl.gov/web/cipher/pheweb	https://www.science.org/doi/10.1126/science.adj2251	MVP_R4.1000G_AGR.Phe_512_7.EUR.GIA.dbGaP.txt.gz_ldsc	1741323351668EUR_vtg.txt.gz
0.2185	0.05386	4.058	4.96e-05	0.01357	0.001412	1.081	0.008478	-0.008634	0.00608	Inflammation of the eye	400734	50869	349865	MVP	https://phenomics.va.ornl.gov/web/cipher/pheweb	https://www.science.org/doi/10.1126/science.adj2004	MVP_R4.1000G_AGR.Phe_371.EUR.GIA.dbGaP.txt.gz_ldsc	1741323351668EUR_vtg.txt.gz
0.1783	0.04422	4.032	5.54e-05	0.03123	0.002291	1.173	0.01101	-0.01045	0.007277	Chronic pain	408721	54185	354536	MVP	https://phenomics.va.ornl.gov/web/cipher/pheweb	https://www.science.org/doi/10.1126/science.adj1908	MVP_R4.1000G_AGR.Phe_338_2.EUR.GIA.dbGaP.txt.gz_ldsc	1741323351668EUR_vtg.txt.gz
0.2275	0.05703	3.989	6.63e-05	0.01228	0.001786	1.02	0.008088	-0.005058	0.005819	Osteoporosis	315668	12204	303464	MVP	https://phenomics.va.ornl.gov/web/cipher/pheweb	https://www.science.org/doi/10.1126/science.adj2884	MVP_R4.1000G_AGR.SkMsOP.EUR.GIA.dbGaP.txt.gz_ldsc	1741323351668EUR_vtg.txt.gz
0.1146	0.02902	3.949	7.84e-05	0.225	0.01012	1.095	0.01414	-0.007634	0.006952	Schizophrenia	150064	36989	113075	PGC	https://www.med.unc.edu/pgc/results-and-downloads/	GWAS made available by PGC. Please go to reference for details	ckqny.scz2snpres.ctgvl	1741323351668EUR_vtg.txt.gz
0.1936	0.04974	3.892	9.95e-05	0.01372	0.001443	1.065	0.009088	-0.003214	0.006049	Acute sinusitis	408209	25846	382363	MVP	https://phenomics.va.ornl.gov/web/cipher/pheweb	https://www.science.org/doi/10.1126/science.adj2192	MVP_R4.1000G_AGR.Phe_464.EUR.GIA.dbGaP.txt.gz_ldsc	1741323351668EUR_vtg.txt.gz
0.1766	0.04549	3.882	0.0001034	0.01998	0.001623	1.101	0.009015	-0.001113	0.00643	Other symptoms	381488	81397	300091	MVP	https://phenomics.va.ornl.gov/web/cipher/pheweb	https://www.science.org/doi/10.1126/science.adj1540	MVP_R4.1000G_AGR.Phe_1005.EUR.GIA.dbGaP.txt.gz_ldsc	1741323351668EUR_vtg.txt.gz
0.1736	0.0448	3.874	0.000107	0.02615	0.001938	1.13	0.01013	-0.01795	0.006722	Insomnia	408138	78566	329572	MVP	https://phenomics.va.ornl.gov/web/cipher/pheweb	https://www.science.org/doi/10.1126/science.adj1888	MVP_R4.1000G_AGR.Phe_327_4.EUR.GIA.dbGaP.txt.gz_ldsc	1741323351668EUR_vtg.txt.gz
0.3522	0.09098	3.871	0.0001084	0.004	0.0011	1.055	0.007455	-0.01352	0.006146	Superficial injury without mention of infection	411933	16807	395126	MVP	https://phenomics.va.ornl.gov/web/cipher/pheweb	https://www.science.org/doi/10.1126/science.adj2801	MVP_R4.1000G_AGR.Phe_915.EUR.GIA.dbGaP.txt.gz_ldsc	1741323351668EUR_vtg.txt.gz
0.2904	0.07532	3.855	0.0001156	0.006049	0.001135	1.013	0.007593	-0.01287	0.006222	Anal and rectal conditions	425083	14676	410407	MVP	https://phenomics.va.ornl.gov/web/cipher/pheweb	https://www.science.org/doi/10.1126/science.adj2362	MVP_R4.1000G_AGR.Phe_565.EUR.GIA.dbGaP.txt.gz_ldsc	1741323351668EUR_vtg.txt.gz
0.1698	0.04438	3.825	0.0001306	0.03188	0.002214	1.2	0.01304	-0.01784	0.006836	Sleep disorders	393565	120335	273230	MVP	https://phenomics.va.ornl.gov/web/cipher/pheweb	https://www.science.org/doi/10.1126/science.adj1883	MVP_R4.1000G_AGR.Phe_327.EUR.GIA.dbGaP.txt.gz_ldsc	1741323351668EUR_vtg.txt.gz
0.3471	0.0909	3.818	0.0001343	0.003446	0.001157	1.019	0.007832	0.003532	0.00567	Other disorders of intestine	434371	6366	428005	MVP	https://phenomics.va.ornl.gov/web/cipher/pheweb	https://www.science.org/doi/10.1126/science.adj2367	MVP_R4.1000G_AGR.Phe_569.EUR.GIA.dbGaP.txt.gz_ldsc	1741323351668EUR_vtg.txt.gz
0.1931	0.05076	3.804	0.0001426	0.01438	0.001401	1.114	0.008347	0.002077	0.006464	Diarrhea	407036	47462	359574	MVP	https://phenomics.va.ornl.gov/web/cipher/pheweb	https://www.science.org/doi/10.1126/science.adj2352	MVP_R4.1000G_AGR.Phe_561_1.EUR.GIA.dbGaP.txt.gz_ldsc	1741323351668EUR_vtg.txt.gz
0.1296	0.03422	3.786	0.0001528	0.05627	0.002903	1.281	0.01337	-0.0002596	0.007318	Nonspecific chest pain	390081	127672	262409	MVP	https://phenomics.va.ornl.gov/web/cipher/pheweb	https://www.science.org/doi/10.1126/science.adj2083	MVP_R4.1000G_AGR.Phe_418.EUR.GIA.dbGaP.txt.gz_ldsc	1741323351668EUR_vtg.txt.gz
0.4375	0.1156	3.784	0.0001544	0.003658	0.00124	1.009	0.007342	0.01196	0.00572	Diagnoses - main ICD10: K50 Crohn's disease [regional enteritis]	361194	968	360226	UK Biobank	https://docs.google.com/spreadsheets/d/1kvPoupSzsSFBNSztMzl04xMoSC3Kcx3CrjVf4yBmESU/edit?ts=5b5f17db#gid=227859291	PHESANT Transformation:NA-Notes:NA-Variable type:categorical-Phenotype ID:K50	categorical.K50.txt	1741323351668EUR_vtg.txt.gz
0.3825	0.1012	3.78	0.000157	0.003239	0.001085	1.057	0.007066	0.007711	0.005723	Other inflammatory spondylopathies	443651	7622	436029	MVP	https://phenomics.va.ornl.gov/web/cipher/pheweb	https://www.science.org/doi/10.1126/science.adj2610	MVP_R4.1000G_AGR.Phe_715.EUR.GIA.dbGaP.txt.gz_ldsc	1741323351668EUR_vtg.txt.gz
0.202	0.05353	3.773	0.000161	0.01349	0.001414	1.076	0.008647	-2.98e-05	0.006132	Myalgia and myositis unspecified	425462	26813	398649	MVP	https://phenomics.va.ornl.gov/web/cipher/pheweb	https://www.science.org/doi/10.1126/science.adj2720	MVP_R4.1000G_AGR.Phe_770.EUR.GIA.dbGaP.txt.gz_ldsc	1741323351668EUR_vtg.txt.gz
0.1455	0.03858	3.771	0.0001627	0.04017	0.002266	1.176	0.01076	-0.006563	0.006506	Cervicalgia	410738	83615	327123	MVP	https://phenomics.va.ornl.gov/web/cipher/pheweb	https://www.science.org/doi/10.1126/science.adj2714	MVP_R4.1000G_AGR.Phe_761.EUR.GIA.dbGaP.txt.gz_ldsc	1741323351668EUR_vtg.txt.gz
0.5182	0.1376	3.764	0.000167	0.004083	0.001661	1.028	0.008357	0.01683	0.005877	Crohn's Disease	315668	2256	313412	MVP	https://phenomics.va.ornl.gov/web/cipher/pheweb	https://www.science.org/doi/10.1126/science.adj1327	MVP_R4.1000G_AGR.GICrohn.EUR.GIA.dbGaP.txt.gz_ldsc	1741323351668EUR_vtg.txt.gz
0.1319	0.03517	3.75	0.000177	0.05173	0.002797	1.227	0.01293	-0.003256	0.007295	Other symptoms of respiratory system	375073	173161	201912	MVP	https://phenomics.va.ornl.gov/web/cipher/pheweb	https://www.science.org/doi/10.1126/science.adj2248	MVP_R4.1000G_AGR.Phe_512.EUR.GIA.dbGaP.txt.gz_ldsc	1741323351668EUR_vtg.txt.gz
0.1487	0.03976	3.741	0.0001835	0.03943	0.002511	1.187	0.01172	-0.009104	0.007854	Pain	392986	73677	319309	MVP	https://phenomics.va.ornl.gov/web/cipher/pheweb	https://www.science.org/doi/10.1126/science.adj1906	MVP_R4.1000G_AGR.Phe_338.EUR.GIA.dbGaP.txt.gz_ldsc	1741323351668EUR_vtg.txt.gz
0.1136	0.03039	3.739	0.0001849	0.06853	0.00312	1.078	0.01218	0.002958	0.006813	Multisite chronic pain	380000	NA	NA	UK Biobank	http://researchdata.gla.ac.uk/822/	large-scale genome-wide association study (GWAS) of Multisite chronic pain (MCP) in ~380,000 UK Biobank participants. MCP was defined as the sum of body sites at which chronic pain (at least 3 months duration) was recorded: 0 to 7 sites. Those who answered that they had chronic pain ‘all over the body’ were excluded from the GWAS as there is some evidence that this phenotype relating to widesprea…	chronic_pain-bgen.stats.all	1741323351668EUR_vtg.txt.gz
0.1447	0.0388	3.73	0.0001912	0.06543	0.00292	1.353	0.01498	-0.01106	0.007722	Esophagitis, GERD and related diseases	413414	185368	228046	MVP (EUR)	https://ftp.ncbi.nlm.nih.gov/dbgap/studies/phs002453/analyses/GIA/	Phe_530_1. PheCodes_Digestive System	MVP_R4.1000G_AGR.Phe_530_1.EUR.GIA.dbGaP.txt.gz.ctg	1741323351668EUR_vtg.txt.gz
0.1447	0.03879	3.73	0.0001919	0.06544	0.002923	1.353	0.01498	-0.01103	0.007718	Esophagitis, GERD and related diseases	413414	185368	228046	MVP	https://phenomics.va.ornl.gov/web/cipher/pheweb	https://www.science.org/doi/10.1126/science.adj2301	MVP_R4.1000G_AGR.Phe_530_1.EUR.GIA.dbGaP.txt.gz_ldsc	1741323351668EUR_vtg.txt.gz
0.1213	0.03275	3.703	0.0002131	0.03812	0.001954	1.061	0.01098	0.01427	0.006967	Back pain	509000	145000	364000	UK Biobank + CHARGE	https://zenodo.org/record/1319332	Meta-analysis results from UK Biobank and CHARGE provided in Freidin et al (2019) Insight into the genetic architecture of back pain and its risk factors from a study of 509,000 individuals	155142041596720170921_crude_pain_450K_cleaned.txt	1741323351668EUR_vtg.txt.gz
0.147	0.03971	3.701	0.0002148	0.04619	0.002398	1.057	0.01033	0.01025	0.007121	Long-standing illness, disability or infirmity	352798	114798	238000	UK Biobank	https://docs.google.com/spreadsheets/d/1kvPoupSzsSFBNSztMzl04xMoSC3Kcx3CrjVf4yBmESU/edit?ts=5b5f17db#gid=227859291	PHESANT Transformation:2188_0|| CAT-SINGLE || Inc(>=10): 0(238000) || Inc(>=10): 1(114798) || CAT-SINGLE-BINARY || sample 238000/114798(352798) ||-Notes:ACE touchscreen question Do you have any long-standing illness, disability or infirmity?-Variable type:binary	binary.2188.txt	1741323351668EUR_vtg.txt.gz
0.2176	0.05895	3.691	0.000223	0.007838	0.001211	1.042	0.008286	-0.003036	0.005858	Gingivitis	433623	24224	409399	MVP (EUR)	https://ftp.ncbi.nlm.nih.gov/dbgap/studies/phs002453/analyses/GIA/	Phe_523_1. PheCodes_Digestive System	MVP_R4.1000G_AGR.Phe_523_1.EUR.GIA.dbGaP.txt.gz.ctg	1741323351668EUR_vtg.txt.gz
0.1964	0.05321	3.691	0.0002237	0.02429	0.002257	1.121	0.01126	-0.01413	0.007048	Atopic/contact dermatitis due to other or unspecified	391439	66194	325245	MVP	https://phenomics.va.ornl.gov/web/cipher/pheweb	https://www.science.org/doi/10.1126/science.adj2807	MVP_R4.1000G_AGR.Phe_939.EUR.GIA.dbGaP.txt.gz_ldsc	1741323351668EUR_vtg.txt.gz
0.1962	0.0532	3.688	0.0002256	0.0243	0.002258	1.121	0.01129	-0.01413	0.00704	Atopic/contact dermatitis due to other or unspecified	391439	66194	325245	MVP (EUR)	https://ftp.ncbi.nlm.nih.gov/dbgap/studies/phs002453/analyses/GIA/	Phe_939. PheCodes_Dermatological System	MVP_R4.1000G_AGR.Phe_939.EUR.GIA.dbGaP.txt.gz.ctg	1741323351668EUR_vtg.txt.gz
0.1423	0.03859	3.687	0.0002265	0.06372	0.002858	1.341	0.01517	-0.01056	0.007579	Diseases of esophagus	413308	189441	223867	MVP (EUR)	https://ftp.ncbi.nlm.nih.gov/dbgap/studies/phs002453/analyses/GIA/	Phe_530. PheCodes_Digestive System	MVP_R4.1000G_AGR.Phe_530.EUR.GIA.dbGaP.txt.gz.ctg	1741323351668EUR_vtg.txt.gz
0.1423	0.03859	3.687	0.0002268	0.06372	0.002861	1.341	0.01518	-0.01054	0.007573	Diseases of esophagus	413308	189441	223867	MVP	https://phenomics.va.ornl.gov/web/cipher/pheweb	https://www.science.org/doi/10.1126/science.adj2300	MVP_R4.1000G_AGR.Phe_530.EUR.GIA.dbGaP.txt.gz_ldsc	1741323351668EUR_vtg.txt.gz
0.2174	0.05897	3.686	0.0002274	0.007846	0.001211	1.042	0.008276	-0.002996	0.005855	Gingivitis	433623	24224	409399	MVP	https://phenomics.va.ornl.gov/web/cipher/pheweb	https://www.science.org/doi/10.1126/science.adj2276	MVP_R4.1000G_AGR.Phe_523_1.EUR.GIA.dbGaP.txt.gz_ldsc	1741323351668EUR_vtg.txt.gz
0.1581	0.04291	3.684	0.0002293	0.01694	0.001832	1.064	0.008867	-0.007294	0.005368	Rheumatoid Arthritis	315668	25533	290135	MVP	https://phenomics.va.ornl.gov/web/cipher/pheweb	https://www.science.org/doi/10.1126/science.adj2890	MVP_R4.1000G_AGR.SkMsRA.EUR.GIA.dbGaP.txt.gz_ldsc	1741323351668EUR_vtg.txt.gz
0.4164	0.1132	3.677	0.000236	0.003663	0.001253	1.054	0.008469	-0.01041	0.006247	Psoriatic arthropathy	450620	3087	447533	MVP	https://phenomics.va.ornl.gov/web/cipher/pheweb	https://www.science.org/doi/10.1126/science.adj2565	MVP_R4.1000G_AGR.Phe_696_42.EUR.GIA.dbGaP.txt.gz_ldsc	1741323351668EUR_vtg.txt.gz
0.4161	0.1132	3.676	0.0002368	0.003662	0.001252	1.054	0.008463	-0.0104	0.006247	Psoriatic arthropathy	450620	3087	447533	MVP (EUR)	https://ftp.ncbi.nlm.nih.gov/dbgap/studies/phs002453/analyses/GIA/	Phe_696_42. PheCodes_Dermatological System	MVP_R4.1000G_AGR.Phe_696_42.EUR.GIA.dbGaP.txt.gz.ctg	1741323351668EUR_vtg.txt.gz
0.1964	0.05354	3.668	0.0002445	0.009007	0.001705	1.057	0.009611	-0.01114	0.006149	Tachycardia NOS	424980	15016	409964	MVP	https://phenomics.va.ornl.gov/web/cipher/pheweb	https://www.science.org/doi/10.1126/science.adj2123	MVP_R4.1000G_AGR.Phe_427_7.EUR.GIA.dbGaP.txt.gz_ldsc	1741323351668EUR_vtg.txt.gz
0.1288	0.03522	3.658	0.0002544	0.06319	0.003406	1.282	0.01462	-0.01307	0.007263	Back pain	403139	218071	185068	MVP	https://phenomics.va.ornl.gov/web/cipher/pheweb	https://www.science.org/doi/10.1126/science.adj2713	MVP_R4.1000G_AGR.Phe_760.EUR.GIA.dbGaP.txt.gz_ldsc	1741323351668EUR_vtg.txt.gz
-0.1798	0.0493	-3.648	0.0002644	0.01995	0.002118	1.031	0.008419	0.01218	0.006291	Breastfed as a baby	273743	193838	79905	UK Biobank	https://docs.google.com/spreadsheets/d/1kvPoupSzsSFBNSztMzl04xMoSC3Kcx3CrjVf4yBmESU/edit?ts=5b5f17db#gid=227859291	PHESANT Transformation:1677_0|| CAT-SINGLE || Inc(>=10): 1(193838) || Inc(>=10): 0(79905) || CAT-SINGLE-BINARY || sample 79905/193838(273743) ||-Notes:ACE touchscreen question Were you breastfed when you were a baby?-Variable type:binary	binary.1677.txt	1741323351668EUR_vtg.txt.gz
0.1711	0.04745	3.606	0.0003112	0.01456	0.001379	1.096	0.008911	-0.001282	0.006394	Gingival and periodontal diseases	425474	65820	359654	MVP (EUR)	https://ftp.ncbi.nlm.nih.gov/dbgap/studies/phs002453/analyses/GIA/	Phe_523. PheCodes_Digestive System	MVP_R4.1000G_AGR.Phe_523.EUR.GIA.dbGaP.txt.gz.ctg	1741323351668EUR_vtg.txt.gz
0.171	0.04746	3.603	0.0003147	0.01457	0.001379	1.095	0.008899	-0.001246	0.006401	Gingival and periodontal diseases	425474	65820	359654	MVP	https://phenomics.va.ornl.gov/web/cipher/pheweb	https://www.science.org/doi/10.1126/science.adj2275	MVP_R4.1000G_AGR.Phe_523.EUR.GIA.dbGaP.txt.gz_ldsc	1741323351668EUR_vtg.txt.gz
0.1588	0.04415	3.597	0.0003221	0.01682	0.00156	1.135	0.009147	-0.01443	0.006632	Urinary tract infection	414457	46012	368445	MVP	https://phenomics.va.ornl.gov/web/cipher/pheweb	https://www.science.org/doi/10.1126/science.adj2430	MVP_R4.1000G_AGR.Phe_591.EUR.GIA.dbGaP.txt.gz_ldsc	1741323351668EUR_vtg.txt.gz
0.1289	0.03584	3.597	0.0003224	0.03506	0.002196	1.042	0.009702	0.005164	0.006297	Pain type(s) experienced in last month: Back pain	360391	91349	269042	UK Biobank	https://docs.google.com/spreadsheets/d/1kvPoupSzsSFBNSztMzl04xMoSC3Kcx3CrjVf4yBmESU/edit?ts=5b5f17db#gid=227859291	PHESANT Transformation:6159_0 || CAT-MUL-BINARY-VAR 4 || NO_NAN Remove NA participants 180 || Removed 623 examples != 4 but with missing value (<0) || sample 269042/91349(360391) ||-Notes:ACE touchscreen question In the last month have you experienced any of the following that interfered with your usual activites? (You can select more than one answer) The following checks were performed: If code …	binary.6159_4.txt	1741323351668EUR_vtg.txt.gz
0.2187	0.06085	3.595	0.0003246	0.01147	0.00166	1.05	0.008368	0.002113	0.006447	Takes medication for Skin condition (ex. Eczema, Psoriasis)?	315668	17897	297771	MVP	https://phenomics.va.ornl.gov/web/cipher/pheweb	https://www.science.org/doi/10.1126/science.adj1301	MVP_R4.1000G_AGR.DoSkinMed.EUR.GIA.dbGaP.txt.gz_ldsc	1741323351668EUR_vtg.txt.gz
0.1151	0.03206	3.589	0.0003318	0.05043	0.004961	1.245	0.01647	0.001803	0.006496	Cardiac dysrhythmias	394665	147555	247110	MVP	https://phenomics.va.ornl.gov/web/cipher/pheweb	https://www.science.org/doi/10.1126/science.adj2109	MVP_R4.1000G_AGR.Phe_427.EUR.GIA.dbGaP.txt.gz_ldsc	1741323351668EUR_vtg.txt.gz
0.2858	0.08029	3.559	0.0003717	0.004778	0.001189	1.003	0.006593	0.004113	0.005462	Noninfectious colitis NAS	361194	8945	352249	UK Biobank	https://docs.google.com/spreadsheets/d/1kvPoupSzsSFBNSztMzl04xMoSC3Kcx3CrjVf4yBmESU/edit?ts=5b5f17db#gid=227859291	PHESANT Transformation:NA-Notes:NA-Variable type:categorical-Phenotype ID:COLITNONINFNAS	categorical.COLITNONINFNAS.txt	1741323351668EUR_vtg.txt.gz
0.149	0.04193	3.554	0.0003796	0.02387	0.001836	1.034	0.00903	0.003801	0.005706	Any ICDMAIN event in hilmo or causes of death	361194	282009	79185	UK Biobank	https://docs.google.com/spreadsheets/d/1kvPoupSzsSFBNSztMzl04xMoSC3Kcx3CrjVf4yBmESU/edit?ts=5b5f17db#gid=227859291	PHESANT Transformation:NA-Notes:NA-Variable type:categorical-Phenotype ID:ICDMAIN_ANY_ENTRY	categorical.ICDMAIN_ANY_ENTRY.txt	1741323351668EUR_vtg.txt.gz
0.241	0.0679	3.548	0.0003875	0.007551	0.001251	1.077	0.00754	-0.009557	0.005758	Effects of other external causes	411672	28735	382937	MVP	https://phenomics.va.ornl.gov/web/cipher/pheweb	https://www.science.org/doi/10.1126/science.adj1554	MVP_R4.1000G_AGR.Phe_1015.EUR.GIA.dbGaP.txt.gz_ldsc	1741323351668EUR_vtg.txt.gz
-0.1411	0.0398	-3.545	0.0003921	0.03432	0.002055	1.04	0.009365	0.01578	0.006073	Mouth/teeth dental problems: None of the above	359841	218346	141495	UK Biobank	https://docs.google.com/spreadsheets/d/1kvPoupSzsSFBNSztMzl04xMoSC3Kcx3CrjVf4yBmESU/edit?ts=5b5f17db#gid=227859291	PHESANT Transformation:6149_0 || CAT-MUL-BINARY-VAR 100 || NO_NAN Remove NA participants 512 || Removed 841 examples != 100 but with missing value (<0) || sample 141495/218346(359841) ||-Notes:ACE touchscreen question Do you have any of the following? (You can select more than one answer) The following checks were performed: If code -7 was selected, then no additional choices were allowed. If cod…	binary.6149_100.txt	1741323351668EUR_vtg.txt.gz
-0.1198	0.03382	-3.542	0.0003964	0.0677	0.004083	1.537	0.0184	0.005631	0.008486	diastolic blood pressure (DBP, minimum, inv-normal transformed)	425735	NA	NA	MVP	https://phenomics.va.ornl.gov/web/cipher/pheweb	https://www.science.org/doi/10.1126/science.adj1287	MVP_R4.1000G_AGR.Diastolic_Min_INT.EUR.GIA.dbGaP.txt.gz_ldsc	1741323351668EUR_vtg.txt.gz
0.1975	0.05589	3.534	0.0004097	0.01091	0.001635	1.044	0.007846	-0.006868	0.005462	Takes medication for Rheumatoid Arthritis?	315668	14438	301230	MVP	https://phenomics.va.ornl.gov/web/cipher/pheweb	https://www.science.org/doi/10.1126/science.adj2891	MVP_R4.1000G_AGR.SkMsRAMed.EUR.GIA.dbGaP.txt.gz_ldsc	1741323351668EUR_vtg.txt.gz
0.1657	0.047	3.526	0.000422	0.02313	0.002455	1.111	0.01132	-0.01646	0.006794	Diseases of sebaceous glands	398370	61215	337155	MVP (EUR)	https://ftp.ncbi.nlm.nih.gov/dbgap/studies/phs002453/analyses/GIA/	Phe_706. PheCodes_Dermatological System	MVP_R4.1000G_AGR.Phe_706.EUR.GIA.dbGaP.txt.gz.ctg	1741323351668EUR_vtg.txt.gz
0.1658	0.04711	3.52	0.0004314	0.02312	0.002456	1.111	0.01131	-0.01647	0.00681	Diseases of sebaceous glands	398370	61215	337155	MVP	https://phenomics.va.ornl.gov/web/cipher/pheweb	https://www.science.org/doi/10.1126/science.adj2587	MVP_R4.1000G_AGR.Phe_706.EUR.GIA.dbGaP.txt.gz_ldsc	1741323351668EUR_vtg.txt.gz
0.1585	0.04509	3.515	0.0004398	0.0301	0.001866	1.155	0.009894	-0.01244	0.006778	Pain in limb	371242	123382	247860	MVP	https://phenomics.va.ornl.gov/web/cipher/pheweb	https://www.science.org/doi/10.1126/science.adj2730	MVP_R4.1000G_AGR.Phe_773.EUR.GIA.dbGaP.txt.gz_ldsc	1741323351668EUR_vtg.txt.gz
0.2778	0.07941	3.498	0.0004692	0.004962	0.001246	1.003	0.006598	0.005528	0.005463	Diagnoses - main ICD10: K52 Other non-infective gastro-enteritis and colitis	361194	8757	352437	UK Biobank	https://docs.google.com/spreadsheets/d/1kvPoupSzsSFBNSztMzl04xMoSC3Kcx3CrjVf4yBmESU/edit?ts=5b5f17db#gid=227859291	PHESANT Transformation:NA-Notes:NA-Variable type:categorical-Phenotype ID:K52	categorical.K52.txt	1741323351668EUR_vtg.txt.gz
0.1319	0.03772	3.496	0.0004728	0.03771	0.002475	1.204	0.01141	0.00153	0.006911	Abdominal pain	388315	89262	299053	MVP	https://phenomics.va.ornl.gov/web/cipher/pheweb	https://www.science.org/doi/10.1126/science.adj2735	MVP_R4.1000G_AGR.Phe_785.EUR.GIA.dbGaP.txt.gz_ldsc	1741323351668EUR_vtg.txt.gz
0.2735	0.07841	3.488	0.0004861	0.004845	0.001308	1.044	0.008839	-0.006168	0.005725	Pruritus and related conditions	428728	11569	417159	MVP	https://phenomics.va.ornl.gov/web/cipher/pheweb	https://www.science.org/doi/10.1126/science.adj2567	MVP_R4.1000G_AGR.Phe_698.EUR.GIA.dbGaP.txt.gz_ldsc	1741323351668EUR_vtg.txt.gz
0.2733	0.07836	3.488	0.0004864	0.00485	0.001307	1.044	0.008825	-0.00619	0.005723	Pruritus and related conditions	428728	11569	417159	MVP (EUR)	https://ftp.ncbi.nlm.nih.gov/dbgap/studies/phs002453/analyses/GIA/	Phe_698. PheCodes_Dermatological System	MVP_R4.1000G_AGR.Phe_698.EUR.GIA.dbGaP.txt.gz.ctg	1741323351668EUR_vtg.txt.gz
0.1447	0.04172	3.467	0.0005259	0.06879	0.007227	1.291	0.02163	0.01043	0.008252	neutrophil (fraction, maximum, inv-norm transformed)	261863	NA	NA	MVP	https://phenomics.va.ornl.gov/web/cipher/pheweb	https://www.science.org/doi/10.1126/science.adj1463	MVP_R4.1000G_AGR.Neut_Fra_Max_INT.EUR.GIA.dbGaP.txt.gz_ldsc	1741323351668EUR_vtg.txt.gz
0.1331	0.03839	3.467	0.0005261	0.06285	0.002881	1.333	0.01426	-0.007739	0.007567	GERD	412728	175991	236737	MVP (EUR)	https://ftp.ncbi.nlm.nih.gov/dbgap/studies/phs002453/analyses/GIA/	Phe_530_11. PheCodes_Digestive System	MVP_R4.1000G_AGR.Phe_530_11.EUR.GIA.dbGaP.txt.gz.ctg	1741323351668EUR_vtg.txt.gz
0.133	0.03838	3.467	0.0005268	0.06285	0.002883	1.333	0.01425	-0.007713	0.007564	GERD	412728	175991	236737	MVP	https://phenomics.va.ornl.gov/web/cipher/pheweb	https://www.science.org/doi/10.1126/science.adj2302	MVP_R4.1000G_AGR.Phe_530_11.EUR.GIA.dbGaP.txt.gz_ldsc	1741323351668EUR_vtg.txt.gz
0.2006	0.05788	3.466	0.0005274	0.0148	0.00196	1.083	0.009711	0.008291	0.006979	Skin condition (ex. Eczema, Psoriasis)	315668	32976	282692	MVP	https://phenomics.va.ornl.gov/web/cipher/pheweb	https://www.science.org/doi/10.1126/science.adj1300	MVP_R4.1000G_AGR.DoSkin.EUR.GIA.dbGaP.txt.gz_ldsc	1741323351668EUR_vtg.txt.gz
0.18	0.05198	3.463	0.0005338	0.009052	0.001317	1.071	0.007864	-0.01206	0.005316	Other disorders of bladder	429885	27389	402496	MVP	https://phenomics.va.ornl.gov/web/cipher/pheweb	https://www.science.org/doi/10.1126/science.adj2443	MVP_R4.1000G_AGR.Phe_596.EUR.GIA.dbGaP.txt.gz_ldsc	1741323351668EUR_vtg.txt.gz
0.1513	0.04374	3.459	0.0005423	0.02245	0.002617	1.152	0.01812	-0.004702	0.007084	Erythematosquamous dermatosis	425227	31321	393906	MVP (EUR)	https://ftp.ncbi.nlm.nih.gov/dbgap/studies/phs002453/analyses/GIA/	Phe_690. PheCodes_Dermatological System	MVP_R4.1000G_AGR.Phe_690.EUR.GIA.dbGaP.txt.gz.ctg	1741323351668EUR_vtg.txt.gz
0.1514	0.04376	3.459	0.0005431	0.02245	0.002617	1.152	0.01813	-0.004687	0.007087	Erythematosquamous dermatosis	425227	31321	393906	MVP	https://phenomics.va.ornl.gov/web/cipher/pheweb	https://www.science.org/doi/10.1126/science.adj2549	MVP_R4.1000G_AGR.Phe_690.EUR.GIA.dbGaP.txt.gz_ldsc	1741323351668EUR_vtg.txt.gz
0.1671	0.04842	3.451	0.0005582	0.01573	0.001746	1.153	0.01004	-0.006906	0.005942	Hypotension	413247	38699	374548	MVP	https://phenomics.va.ornl.gov/web/cipher/pheweb	https://www.science.org/doi/10.1126/science.adj2185	MVP_R4.1000G_AGR.Phe_458.EUR.GIA.dbGaP.txt.gz_ldsc	1741323351668EUR_vtg.txt.gz
0.1623	0.04709	3.448	0.0005655	0.01248	0.001469	1.072	0.008406	-0.0003848	0.006113	Otitis media and Eustachian tube disorders	418432	23981	394451	MVP	https://phenomics.va.ornl.gov/web/cipher/pheweb	https://www.science.org/doi/10.1126/science.adj2034	MVP_R4.1000G_AGR.Phe_381.EUR.GIA.dbGaP.txt.gz_ldsc	1741323351668EUR_vtg.txt.gz
0.1477	0.04302	3.435	0.0005932	0.02271	0.002023	1.18	0.01179	-0.007299	0.006792	Disorders of fluid, electrolyte, and acid-based balance	398139	74426	323713	MVP	https://phenomics.va.ornl.gov/web/cipher/pheweb	https://www.science.org/doi/10.1126/science.adj1755	MVP_R4.1000G_AGR.Phe_276.EUR.GIA.dbGaP.txt.gz_ldsc	1741323351668EUR_vtg.txt.gz
0.1508	0.04423	3.41	0.0006497	0.02471	0.001917	1.143	0.01074	-0.01268	0.005936	Other disorders of synovium, tendon, and bursa	409575	54288	355287	MVP	https://phenomics.va.ornl.gov/web/cipher/pheweb	https://www.science.org/doi/10.1126/science.adj2639	MVP_R4.1000G_AGR.Phe_727.EUR.GIA.dbGaP.txt.gz_ldsc	1741323351668EUR_vtg.txt.gz
0.1457	0.04277	3.407	0.0006569	0.02655	0.002025	1.042	0.009199	0.01051	0.006704	Symptoms, signs and abnormal clinical and laboratory findings, not elsewhere classified	361194	97602	263592	UK Biobank	https://docs.google.com/spreadsheets/d/1kvPoupSzsSFBNSztMzl04xMoSC3Kcx3CrjVf4yBmESU/edit?ts=5b5f17db#gid=227859291	PHESANT Transformation:NA-Notes:NA-Variable type:categorical-Phenotype ID:XVIII_MISCFINDINGS	categorical.XVIII_MISCFINDINGS.txt	1741323351668EUR_vtg.txt.gz
0.1874	0.055	3.406	0.0006588	0.01345	0.001501	1.021	0.007267	-0.01131	0.0061	Diseases of the nervous system	361194	21323	339871	UK Biobank	https://docs.google.com/spreadsheets/d/1kvPoupSzsSFBNSztMzl04xMoSC3Kcx3CrjVf4yBmESU/edit?ts=5b5f17db#gid=227859291	PHESANT Transformation:NA-Notes:NA-Variable type:categorical-Phenotype ID:VI_NERVOUS	categorical.VI_NERVOUS.txt	1741323351668EUR_vtg.txt.gz
0.1481	0.04348	3.405	0.0006608	0.02215	0.002635	1.149	0.01827	-0.004337	0.007022	Seborrheic dermatitis	425845	31107	394738	MVP	https://phenomics.va.ornl.gov/web/cipher/pheweb	https://www.science.org/doi/10.1126/science.adj2550	MVP_R4.1000G_AGR.Phe_690_1.EUR.GIA.dbGaP.txt.gz_ldsc	1741323351668EUR_vtg.txt.gz
0.148	0.04347	3.405	0.0006612	0.02215	0.002635	1.149	0.01827	-0.00435	0.00702	Seborrheic dermatitis	425845	31107	394738	MVP (EUR)	https://ftp.ncbi.nlm.nih.gov/dbgap/studies/phs002453/analyses/GIA/	Phe_690_1. PheCodes_Dermatological System	MVP_R4.1000G_AGR.Phe_690_1.EUR.GIA.dbGaP.txt.gz.ctg	1741323351668EUR_vtg.txt.gz
0.148	0.04372	3.385	0.0007128	0.02211	0.001781	1.125	0.00984	0.0004297	0.006509	Constipation	407003	48515	358488	MVP	https://phenomics.va.ornl.gov/web/cipher/pheweb	https://www.science.org/doi/10.1126/science.adj2357	MVP_R4.1000G_AGR.Phe_563.EUR.GIA.dbGaP.txt.gz_ldsc	1741323351668EUR_vtg.txt.gz
-0.1364	0.04035	-3.38	0.0007242	0.06318	0.005709	1.296	0.01565	-0.005501	0.008148	lymphocyte (fraction, minimum, inv-norm transformed)	290958	NA	NA	MVP	https://phenomics.va.ornl.gov/web/cipher/pheweb	https://www.science.org/doi/10.1126/science.adj1400	MVP_R4.1000G_AGR.Lymph_Fra_Min_INT.EUR.GIA.dbGaP.txt.gz_ldsc	1741323351668EUR_vtg.txt.gz
0.1764	0.05219	3.379	0.0007274	0.01017	0.001376	1.079	0.00766	-0.01018	0.005843	Hypovolemia	416568	22799	393769	MVP	https://phenomics.va.ornl.gov/web/cipher/pheweb	https://www.science.org/doi/10.1126/science.adj1764	MVP_R4.1000G_AGR.Phe_276_5.EUR.GIA.dbGaP.txt.gz_ldsc	1741323351668EUR_vtg.txt.gz
0.246	0.07287	3.375	0.000737	0.004611	0.001001	1.016	0.006864	-0.007986	0.005468	Diseases of the jaws	432666	9320	423346	MVP (EUR)	https://ftp.ncbi.nlm.nih.gov/dbgap/studies/phs002453/analyses/GIA/	Phe_526. PheCodes_Digestive System	MVP_R4.1000G_AGR.Phe_526.EUR.GIA.dbGaP.txt.gz.ctg	1741323351668EUR_vtg.txt.gz
0.2451	0.07262	3.375	0.0007381	0.06924	0.01683	0.9858	0.006937	-0.01953	0.005325	Severity of problems due to mania or irritability	26655	7988	18667	UK Biobank	https://docs.google.com/spreadsheets/d/1kvPoupSzsSFBNSztMzl04xMoSC3Kcx3CrjVf4yBmESU/edit?ts=5b5f17db#gid=227859291	PHESANT Transformation:20493_0|| CAT-SINGLE || Inc(>=10): 0(18667) || Inc(>=10): 1(7988) || CAT-SINGLE-BINARY || sample 18667/7988(26655) ||-Notes:Question asked: How much of a problem have these high or irritable periods caused you? Question was asked when ~F20501~ was Yes or ~F20502~ was Yes.-Variable type:binary	binary.20493.txt	1741323351668EUR_vtg.txt.gz
0.2462	0.07295	3.375	0.0007386	0.004608	0.0009993	1.016	0.006861	-0.007978	0.00547	Diseases of the jaws	432666	9320	423346	MVP	https://phenomics.va.ornl.gov/web/cipher/pheweb	https://www.science.org/doi/10.1126/science.adj2285	MVP_R4.1000G_AGR.Phe_526.EUR.GIA.dbGaP.txt.gz_ldsc	1741323351668EUR_vtg.txt.gz
0.1076	0.03193	3.368	0.0007562	0.0446	0.003929	1.213	0.01699	-0.009333	0.006332	Diverticulosis	391713	53699	338014	MVP	https://phenomics.va.ornl.gov/web/cipher/pheweb	https://www.science.org/doi/10.1126/science.adj2355	MVP_R4.1000G_AGR.Phe_562_1.EUR.GIA.dbGaP.txt.gz_ldsc	1741323351668EUR_vtg.txt.gz
0.1699	0.0506	3.359	0.0007829	0.01261	0.001312	1.047	0.008489	-0.004497	0.005817	Palpitations	428413	20430	407983	MVP	https://phenomics.va.ornl.gov/web/cipher/pheweb	https://www.science.org/doi/10.1126/science.adj2125	MVP_R4.1000G_AGR.Phe_427_9.EUR.GIA.dbGaP.txt.gz_ldsc	1741323351668EUR_vtg.txt.gz
0.1531	0.04559	3.358	0.0007837	0.01995	0.001848	1.135	0.01032	0.0007054	0.006228	Cardiac conduction disorders	402492	65081	337411	MVP	https://phenomics.va.ornl.gov/web/cipher/pheweb	https://www.science.org/doi/10.1126/science.adj2095	MVP_R4.1000G_AGR.Phe_426.EUR.GIA.dbGaP.txt.gz_ldsc	1741323351668EUR_vtg.txt.gz
0.1781	0.05329	3.343	0.0008296	0.01604	0.001715	1.106	0.01019	-0.01465	0.007102	Hemorrhoids	380506	55499	325007	MVP	https://phenomics.va.ornl.gov/web/cipher/pheweb	https://www.science.org/doi/10.1126/science.adj2180	MVP_R4.1000G_AGR.Phe_455.EUR.GIA.dbGaP.txt.gz_ldsc	1741323351668EUR_vtg.txt.gz
0.1492	0.04475	3.334	0.0008566	0.02138	0.001773	1.158	0.00956	-0.006293	0.006131	Senile cataract	404086	197600	206486	MVP	https://phenomics.va.ornl.gov/web/cipher/pheweb	https://www.science.org/doi/10.1126/science.adj1981	MVP_R4.1000G_AGR.Phe_366_2.EUR.GIA.dbGaP.txt.gz_ldsc	1741323351668EUR_vtg.txt.gz
0.2008	0.06041	3.324	0.0008878	0.007003	0.001148	1.049	0.007341	0.003193	0.005119	Chronic pharyngitis and nasopharyngitis	425842	21265	404577	MVP	https://phenomics.va.ornl.gov/web/cipher/pheweb	https://www.science.org/doi/10.1126/science.adj2198	MVP_R4.1000G_AGR.Phe_472.EUR.GIA.dbGaP.txt.gz_ldsc	1741323351668EUR_vtg.txt.gz
0.09358	0.02817	3.322	0.0008928	0.1124	0.009696	1.624	0.04061	-0.01202	0.01002	heart rate (HR, maximum, inv-normal transformed)	425748	NA	NA	MVP	https://phenomics.va.ornl.gov/web/cipher/pheweb	https://www.science.org/doi/10.1126/science.adj2849	MVP_R4.1000G_AGR.Pulse_Max_INT.EUR.GIA.dbGaP.txt.gz_ldsc	1741323351668EUR_vtg.txt.gz
0.1529	0.04605	3.32	0.0008991	0.01723	0.001506	1.119	0.009546	-0.006645	0.006702	Dental caries	424816	79403	345413	MVP (EUR)	https://ftp.ncbi.nlm.nih.gov/dbgap/studies/phs002453/analyses/GIA/	Phe_521_1. PheCodes_Digestive System	MVP_R4.1000G_AGR.Phe_521_1.EUR.GIA.dbGaP.txt.gz.ctg	1741323351668EUR_vtg.txt.gz
0.1528	0.04609	3.315	0.0009161	0.01723	0.001506	1.119	0.009524	-0.006596	0.006709	Dental caries	424816	79403	345413	MVP	https://phenomics.va.ornl.gov/web/cipher/pheweb	https://www.science.org/doi/10.1126/science.adj2270	MVP_R4.1000G_AGR.Phe_521_1.EUR.GIA.dbGaP.txt.gz_ldsc	1741323351668EUR_vtg.txt.gz
0.2779	0.08383	3.315	0.0009179	0.004476	0.001108	1.046	0.007788	-0.01091	0.006029	Hemorrhage of rectum and anus	429331	14212	415119	MVP	https://phenomics.va.ornl.gov/web/cipher/pheweb	https://www.science.org/doi/10.1126/science.adj2399	MVP_R4.1000G_AGR.Phe_578_8.EUR.GIA.dbGaP.txt.gz_ldsc	1741323351668EUR_vtg.txt.gz
0.2103	0.06348	3.313	0.0009234	0.007264	0.001147	1.033	0.00803	0.001632	0.005543	Functional digestive disorders	419273	27707	391566	MVP	https://phenomics.va.ornl.gov/web/cipher/pheweb	https://www.science.org/doi/10.1126/science.adj2358	MVP_R4.1000G_AGR.Phe_564.EUR.GIA.dbGaP.txt.gz_ldsc	1741323351668EUR_vtg.txt.gz
0.2969	0.08972	3.309	0.0009356	0.003948	0.001189	1.031	0.007538	-0.006239	0.005396	Other upper respiratory disease	417120	16591	400529	MVP	https://phenomics.va.ornl.gov/web/cipher/pheweb	https://www.science.org/doi/10.1126/science.adj2211	MVP_R4.1000G_AGR.Phe_479.EUR.GIA.dbGaP.txt.gz_ldsc	1741323351668EUR_vtg.txt.gz
0.139	0.04247	3.274	0.001062	0.02682	0.002075	1.028	0.009828	-0.007171	0.005556	Seen a psychiatrist for nerves, anxiety, tension or depression	359535	41233	318302	UK Biobank	https://docs.google.com/spreadsheets/d/1kvPoupSzsSFBNSztMzl04xMoSC3Kcx3CrjVf4yBmESU/edit?ts=5b5f17db#gid=227859291	PHESANT Transformation:2100_0|| CAT-SINGLE || Inc(>=10): 0(318302) || Inc(>=10): 1(41233) || CAT-SINGLE-BINARY || sample 318302/41233(359535) ||-Notes:ACE touchscreen question Have you ever seen a psychiatrist for nerves, anxiety, tension or depression?-Variable type:binary	binary.2100.txt	1741323351668EUR_vtg.txt.gz
0.1985	0.06065	3.273	0.001065	0.01068	0.001439	1.022	0.007932	-0.005604	0.00633	Alcohol drinker status: Previous	360726	12564	348162	UK Biobank	https://docs.google.com/spreadsheets/d/1kvPoupSzsSFBNSztMzl04xMoSC3Kcx3CrjVf4yBmESU/edit?ts=5b5f17db#gid=227859291	PHESANT Transformation:20117_0 || CAT-SINGLE || CAT-SINGLE-BINARY-VAR: 1 || Inc(>=10): 1(12564) ||-Notes:-Variable type:binary	binary.20117_1.txt	1741323351668EUR_vtg.txt.gz
0.1504	0.0462	3.256	0.001131	0.01769	0.001508	1.118	0.009393	-0.006604	0.006636	Diseases of hard tissues of teeth	423470	81675	341795	MVP (EUR)	https://ftp.ncbi.nlm.nih.gov/dbgap/studies/phs002453/analyses/GIA/	Phe_521. PheCodes_Digestive System	MVP_R4.1000G_AGR.Phe_521.EUR.GIA.dbGaP.txt.gz.ctg	1741323351668EUR_vtg.txt.gz
0.1503	0.04624	3.25	0.001154	0.01769	0.001507	1.118	0.009369	-0.006552	0.006647	Diseases of hard tissues of teeth	423470	81675	341795	MVP	https://phenomics.va.ornl.gov/web/cipher/pheweb	https://www.science.org/doi/10.1126/science.adj2269	MVP_R4.1000G_AGR.Phe_521.EUR.GIA.dbGaP.txt.gz_ldsc	1741323351668EUR_vtg.txt.gz
0.133	0.04106	3.238	0.001204	0.03072	0.002156	1.147	0.009572	-0.007175	0.007001	Acute upper respiratory infections of multiple or unspecified sites	374000	74214	299786	MVP	https://phenomics.va.ornl.gov/web/cipher/pheweb	https://www.science.org/doi/10.1126/science.adj2193	MVP_R4.1000G_AGR.Phe_465.EUR.GIA.dbGaP.txt.gz_ldsc	1741323351668EUR_vtg.txt.gz
0.1411	0.04358	3.238	0.001206	0.02636	0.001951	1.177	0.009785	-0.009498	0.006399	Disorders of refraction and accommodation; blindness and low vision	399356	267840	131516	MVP	https://phenomics.va.ornl.gov/web/cipher/pheweb	https://www.science.org/doi/10.1126/science.adj1983	MVP_R4.1000G_AGR.Phe_367.EUR.GIA.dbGaP.txt.gz_ldsc	1741323351668EUR_vtg.txt.gz
0.1585	0.04898	3.237	0.001209	0.01288	0.001254	1.039	0.007769	-0.0003428	0.005644	Symptoms concerning nutrition, metabolism, and development	426151	23728	402423	MVP	https://phenomics.va.ornl.gov/web/cipher/pheweb	https://www.science.org/doi/10.1126/science.adj1538	MVP_R4.1000G_AGR.Phe_1002.EUR.GIA.dbGaP.txt.gz_ldsc	1741323351668EUR_vtg.txt.gz
0.1707	0.05279	3.233	0.001225	0.008571	0.001722	1.048	0.009708	-0.005437	0.005609	Cyst of kidney, acquired	436601	10273	426328	MVP	https://phenomics.va.ornl.gov/web/cipher/pheweb	https://www.science.org/doi/10.1126/science.adj2422	MVP_R4.1000G_AGR.Phe_586_2.EUR.GIA.dbGaP.txt.gz_ldsc	1741323351668EUR_vtg.txt.gz
0.1325	0.04112	3.223	0.00127	0.02154	0.00169	1.022	0.008368	0.002426	0.00594	Current employment status: Unable to work because of sickness or disability	359931	13756	346175	UK Biobank	https://docs.google.com/spreadsheets/d/1kvPoupSzsSFBNSztMzl04xMoSC3Kcx3CrjVf4yBmESU/edit?ts=5b5f17db#gid=227859291	PHESANT Transformation:6142_0 || CAT-MUL-BINARY-VAR 4 || NO_NAN Remove NA participants 177 || Removed 1086 examples != 4 but with missing value (<0) || sample 346175/13756(359931) ||-Notes:ACE touchscreen question Which of the following describes your current situation? (You can select more than one answer) The following checks were performed: If code -7 was selected, then no additional choices w…	binary.6142_4.txt	1741323351668EUR_vtg.txt.gz
0.09848	0.0306	3.218	0.001289	0.06918	0.005721	1.241	0.01781	0.002281	0.006607	Coronary Artery / Coronary Heart Disease (including heart attack, angina)	315668	52789	262879	MVP	https://phenomics.va.ornl.gov/web/cipher/pheweb	https://www.science.org/doi/10.1126/science.adj1231	MVP_R4.1000G_AGR.CircCAD.EUR.GIA.dbGaP.txt.gz_ldsc	1741323351668EUR_vtg.txt.gz
0.1001	0.03112	3.216	0.001299	0.05405	0.004679	1.249	0.01971	-0.007457	0.006946	Diverticulosis and diverticulitis	391654	60821	330833	MVP	https://phenomics.va.ornl.gov/web/cipher/pheweb	https://www.science.org/doi/10.1126/science.adj2354	MVP_R4.1000G_AGR.Phe_562.EUR.GIA.dbGaP.txt.gz_ldsc	1741323351668EUR_vtg.txt.gz
0.1293	0.04023	3.215	0.001302	0.02337	0.001966	1.109	0.01001	-0.01446	0.006073	Chronic venous insufficiency [CVI]	434110	25476	408634	MVP	https://phenomics.va.ornl.gov/web/cipher/pheweb	https://www.science.org/doi/10.1126/science.adj2181	MVP_R4.1000G_AGR.Phe_456.EUR.GIA.dbGaP.txt.gz_ldsc	1741323351668EUR_vtg.txt.gz
0.3407	0.1061	3.212	0.001317	0.004543	0.00151	1.019	0.00811	0.007453	0.005408	Takes medication for ulcerative colitis?	315668	2625	313043	MVP	https://phenomics.va.ornl.gov/web/cipher/pheweb	https://www.science.org/doi/10.1126/science.adj1340	MVP_R4.1000G_AGR.GIUCMed.EUR.GIA.dbGaP.txt.gz_ldsc	1741323351668EUR_vtg.txt.gz
-0.125	0.03894	-3.209	0.001333	0.03399	0.002451	1.029	0.008005	0.003717	0.005906	Illnesses of siblings: None of the above (group 1)	281979	190969	91010	UK Biobank	https://docs.google.com/spreadsheets/d/1kvPoupSzsSFBNSztMzl04xMoSC3Kcx3CrjVf4yBmESU/edit?ts=5b5f17db#gid=227859291	PHESANT Transformation:20111_0 || CAT-MUL-BINARY-VAR 100 || NO_NAN Remove NA participants 52692 || Removed 26523 examples != 100 but with missing value (<0) || sample 91010/190969(281979) ||-Notes:This field contains the combined results of 2 ACE touchscreen questions, both asked Have any of your brothers or sisters suffered from any of the following diseases? (You can select more than one answer…	binary.20111_100.txt	1741323351668EUR_vtg.txt.gz
0.1278	0.03993	3.201	0.00137	0.03204	0.001936	1.15	0.009988	-0.01406	0.006553	Superficial cellulitis and abscess	401417	72843	328574	MVP (EUR)	https://ftp.ncbi.nlm.nih.gov/dbgap/studies/phs002453/analyses/GIA/	Phe_681. PheCodes_Dermatological System	MVP_R4.1000G_AGR.Phe_681.EUR.GIA.dbGaP.txt.gz.ctg	1741323351668EUR_vtg.txt.gz
0.1278	0.03996	3.199	0.001379	0.03204	0.001936	1.15	0.009991	-0.01407	0.006561	Superficial cellulitis and abscess	401417	72843	328574	MVP	https://phenomics.va.ornl.gov/web/cipher/pheweb	https://www.science.org/doi/10.1126/science.adj2533	MVP_R4.1000G_AGR.Phe_681.EUR.GIA.dbGaP.txt.gz_ldsc	1741323351668EUR_vtg.txt.gz
0.1673	0.05235	3.195	0.001397	0.01535	0.001688	1.023	0.007953	0.00521	0.0066	Diseases of the genitourinary system	361194	71620	289574	UK Biobank	https://docs.google.com/spreadsheets/d/1kvPoupSzsSFBNSztMzl04xMoSC3Kcx3CrjVf4yBmESU/edit?ts=5b5f17db#gid=227859291	PHESANT Transformation:NA-Notes:NA-Variable type:categorical-Phenotype ID:XIV_GENITOURINARY	categorical.XIV_GENITOURINARY.txt	1741323351668EUR_vtg.txt.gz
0.1489	0.04662	3.194	0.001402	0.0158	0.001637	1.162	0.009905	-0.008384	0.00646	Electrolyte imbalance	408039	55646	352393	MVP	https://phenomics.va.ornl.gov/web/cipher/pheweb	https://www.science.org/doi/10.1126/science.adj1756	MVP_R4.1000G_AGR.Phe_276_1.EUR.GIA.dbGaP.txt.gz_ldsc	1741323351668EUR_vtg.txt.gz
0.4815	0.1508	3.193	0.001406	0.002547	0.001213	1.01	0.00713	0.01084	0.005782	Chron's disease NAS	361194	764	360430	UK Biobank	https://docs.google.com/spreadsheets/d/1kvPoupSzsSFBNSztMzl04xMoSC3Kcx3CrjVf4yBmESU/edit?ts=5b5f17db#gid=227859291	PHESANT Transformation:NA-Notes:NA-Variable type:categorical-Phenotype ID:CHRONNAS	categorical.CHRONNAS.txt	1741323351668EUR_vtg.txt.gz
0.2051	0.06469	3.17	0.001526	0.006443	0.001234	1.049	0.007978	-0.01176	0.005282	Functional disorders of bladder	440253	15860	424393	MVP	https://phenomics.va.ornl.gov/web/cipher/pheweb	https://www.science.org/doi/10.1126/science.adj2445	MVP_R4.1000G_AGR.Phe_596_5.EUR.GIA.dbGaP.txt.gz_ldsc	1741323351668EUR_vtg.txt.gz
-0.1214	0.03843	-3.158	0.001587	0.1439	0.01237	0.9852	0.01816	-0.002198	0.007654	Lymphocyte percentage of white cells	173496	NA	NA	UK Biobank and INTERVAL	http://www.bloodcellgenetics.org/	Percentage of white cells that are lymphocytes	lymph_p_N171748_narrow_form.txt.common	1741323351668EUR_vtg.txt.gz
0.1229	0.03891	3.158	0.00159	0.02741	0.00409	1.147	0.01522	-0.0126	0.006358	Atrial flutter	440917	23153	417764	MVP	https://phenomics.va.ornl.gov/web/cipher/pheweb	https://www.science.org/doi/10.1126/science.adj2115	MVP_R4.1000G_AGR.Phe_427_22.EUR.GIA.dbGaP.txt.gz_ldsc	1741323351668EUR_vtg.txt.gz
0.115	0.03652	3.149	0.00164	0.03604	0.002897	1.222	0.01261	-0.002886	0.006328	Angina pectoris	423340	37399	385941	MVP	https://phenomics.va.ornl.gov/web/cipher/pheweb	https://www.science.org/doi/10.1126/science.adj2071	MVP_R4.1000G_AGR.Phe_411_3.EUR.GIA.dbGaP.txt.gz_ldsc	1741323351668EUR_vtg.txt.gz
0.1582	0.05031	3.143	0.00167	0.04357	0.004895	1.013	0.007461	-0.006218	0.00588	Mental health problems ever diagnosed by a professional: Depression	117782	25087	92695	UK Biobank	https://docs.google.com/spreadsheets/d/1kvPoupSzsSFBNSztMzl04xMoSC3Kcx3CrjVf4yBmESU/edit?ts=5b5f17db#gid=227859291	PHESANT Transformation:20544_0 || CAT-MUL-BINARY-VAR 11 || Indicator name x20400_0_0 || Remove indicator var NAs: 243105 || Removed 307 examples != 11 but with missing value (<0) || sample 92695/25087(117782) ||-Notes:Question asked: Have you been diagnosed with one or more of the following mental health problems by a professional, even if you don't have it currently? (tick all that apply): Parti…	binary.20544_11.txt	1741323351668EUR_vtg.txt.gz
0.1699	0.05424	3.133	0.00173	0.0125	0.001495	1.005	0.007746	-0.009405	0.005864	Dorsalgia	361194	8799	352395	UK Biobank	https://docs.google.com/spreadsheets/d/1kvPoupSzsSFBNSztMzl04xMoSC3Kcx3CrjVf4yBmESU/edit?ts=5b5f17db#gid=227859291	PHESANT Transformation:NA-Notes:NA-Variable type:categorical-Phenotype ID:M13_DORSALGIA	categorical.M13_DORSALGIA.txt	1741323351668EUR_vtg.txt.gz
0.1699	0.05424	3.133	0.00173	0.0125	0.001495	1.005	0.007746	-0.009405	0.005864	Diagnoses - main ICD10: M54 Dorsalgia	361194	8361	352833	UK Biobank	https://docs.google.com/spreadsheets/d/1kvPoupSzsSFBNSztMzl04xMoSC3Kcx3CrjVf4yBmESU/edit?ts=5b5f17db#gid=227859291	PHESANT Transformation:NA-Notes:NA-Variable type:categorical-Phenotype ID:M54	categorical.M54.txt	1741323351668EUR_vtg.txt.gz
0.1397	0.04467	3.128	0.001758	0.02655	0.002028	1.203	0.009856	-0.01312	0.006967	Allergic rhinitis	403687	92310	311377	MVP	https://phenomics.va.ornl.gov/web/cipher/pheweb	https://www.science.org/doi/10.1126/science.adj2208	MVP_R4.1000G_AGR.Phe_476.EUR.GIA.dbGaP.txt.gz_ldsc	1741323351668EUR_vtg.txt.gz
-0.1194	0.03828	-3.119	0.001812	0.03881	0.002223	1.047	0.009677	-0.007405	0.006467	Qualifications: Other professional qualifications eg: nursing, teaching	357549	104241	253308	UK Biobank	https://docs.google.com/spreadsheets/d/1kvPoupSzsSFBNSztMzl04xMoSC3Kcx3CrjVf4yBmESU/edit?ts=5b5f17db#gid=227859291	PHESANT Transformation:6138_0 || CAT-MUL-BINARY-VAR 6 || NO_NAN Remove NA participants 510 || Removed 3135 examples != 6 but with missing value (<0) || sample 253308/104241(357549) ||-Notes:ACE touchscreen question Which of the following qualifications do you have? (You can select more than one) The following checks were performed: If code -7 was selected, then no additional choices were allowed.…	binary.6138_6.txt	1741323351668EUR_vtg.txt.gz
0.1641	0.05285	3.106	0.001897	0.01093	0.001572	1.111	0.009626	-0.009521	0.006003	Retention of urine	427934	26796	401138	MVP	https://phenomics.va.ornl.gov/web/cipher/pheweb	https://www.science.org/doi/10.1126/science.adj2452	MVP_R4.1000G_AGR.Phe_599_2.EUR.GIA.dbGaP.txt.gz_ldsc	1741323351668EUR_vtg.txt.gz
0.2784	0.08968	3.105	0.001905	0.002932	0.001006	1.038	0.006996	-0.007057	0.006279	Dysuria	429900	8308	421592	MVP	https://phenomics.va.ornl.gov/web/cipher/pheweb	https://www.science.org/doi/10.1126/science.adj2453	MVP_R4.1000G_AGR.Phe_599_3.EUR.GIA.dbGaP.txt.gz_ldsc	1741323351668EUR_vtg.txt.gz
0.2201	0.07093	3.103	0.001916	0.006426	0.001289	1.024	0.007528	-0.01225	0.00583	Acne	442965	5873	437092	MVP (EUR)	https://ftp.ncbi.nlm.nih.gov/dbgap/studies/phs002453/analyses/GIA/	Phe_706_1. PheCodes_Dermatological System	MVP_R4.1000G_AGR.Phe_706_1.EUR.GIA.dbGaP.txt.gz.ctg	1741323351668EUR_vtg.txt.gz
0.1391	0.04483	3.102	0.001919	0.01795	0.001548	1.095	0.008623	0.00423	0.006751	Chronic sinusitis	412623	37381	375242	MVP	https://phenomics.va.ornl.gov/web/cipher/pheweb	https://www.science.org/doi/10.1126/science.adj2206	MVP_R4.1000G_AGR.Phe_475.EUR.GIA.dbGaP.txt.gz_ldsc	1741323351668EUR_vtg.txt.gz
0.2201	0.07095	3.102	0.001924	0.006421	0.001287	1.024	0.00751	-0.01222	0.005829	Acne	442965	5873	437092	MVP	https://phenomics.va.ornl.gov/web/cipher/pheweb	https://www.science.org/doi/10.1126/science.adj2588	MVP_R4.1000G_AGR.Phe_706_1.EUR.GIA.dbGaP.txt.gz_ldsc	1741323351668EUR_vtg.txt.gz
0.1428	0.04631	3.084	0.002039	0.01552	0.001738	1.104	0.0107	-0.0006707	0.005799	Synovitis and tenosynovitis	431123	23077	408046	MVP	https://phenomics.va.ornl.gov/web/cipher/pheweb	https://www.science.org/doi/10.1126/science.adj2640	MVP_R4.1000G_AGR.Phe_727_1.EUR.GIA.dbGaP.txt.gz_ldsc	1741323351668EUR_vtg.txt.gz
0.1434	0.04659	3.078	0.002082	0.02425	0.002331	1.084	0.009464	-0.01058	0.005934	Congestive Heart Failure	315668	19350	296318	MVP	https://phenomics.va.ornl.gov/web/cipher/pheweb	https://www.science.org/doi/10.1126/science.adj1233	MVP_R4.1000G_AGR.CircCHF.EUR.GIA.dbGaP.txt.gz_ldsc	1741323351668EUR_vtg.txt.gz
0.09504	0.03105	3.061	0.002205	0.2326	0.03539	1.534	0.1114	-0.0004422	0.01128	Alkaline phosphatase	400988	400988	NA	UK Biobank (EUR)	https://pan-ukb-us-east-1.s3.amazonaws.com/sumstats_flat_files/biomarkers-30610-both_sexes-irnt.tsv.bgz	EUR: biomarkers : 30610 : Biological samples > Assay results > Blood assays > Blood biochemistry	biomarkers-30610-both_sexes-irnt.tsv.bgz	1741323351668EUR_vtg.txt.gz
0.08577	0.02807	3.055	0.002247	0.0386	0.001615	1.049	0.01484	0.006213	0.007017	Depression	670257	88328	581929	MVP+UKB+FinnGen	https://medicine.yale.edu/lab/gelernter/stats/	Bi-ancestral depression GWAS in the Million Veteran Program and meta-analysis (Excluding 23andMe)	1666964087006yyVL_DepressionNN.gz	1741323351668EUR_vtg.txt.gz
0.414	0.1355	3.054	0.002257	0.002469	0.001043	1.026	0.007256	-0.0007185	0.005648	Other intestinal obstruction	446104	6438	439666	MVP	https://phenomics.va.ornl.gov/web/cipher/pheweb	https://www.science.org/doi/10.1126/science.adj2350	MVP_R4.1000G_AGR.Phe_560_4.EUR.GIA.dbGaP.txt.gz_ldsc	1741323351668EUR_vtg.txt.gz
0.1807	0.05917	3.053	0.002263	0.008238	0.001241	1.06	0.007044	0.001314	0.006084	Otitis media	423463	16827	406636	MVP	https://phenomics.va.ornl.gov/web/cipher/pheweb	https://www.science.org/doi/10.1126/science.adj2035	MVP_R4.1000G_AGR.Phe_381_1.EUR.GIA.dbGaP.txt.gz_ldsc	1741323351668EUR_vtg.txt.gz
-0.07745	0.02552	-3.035	0.002409	0.05546	0.005813	1.045	0.01537	0.01095	0.004746	Creatinine	95372	NA	NA	UKB (EUR)	https://www.nature.com/articles/s41467-024-52310-9	GCST90445845. NMR	GCST90445845.tsv.common.ctg	1741323351668EUR_vtg.txt.gz
0.2973	0.09822	3.026	0.002474	0.003335	0.0009955	1.026	0.007139	0.001708	0.005604	Intestinal obstruction without mention of hernia	439696	10138	429558	MVP	https://phenomics.va.ornl.gov/web/cipher/pheweb	https://www.science.org/doi/10.1126/science.adj2346	MVP_R4.1000G_AGR.Phe_560.EUR.GIA.dbGaP.txt.gz_ldsc	1741323351668EUR_vtg.txt.gz
0.2319	0.07679	3.02	0.002524	0.005173	0.001159	1.059	0.008313	-0.006064	0.005755	Acid-base balance disorder	434483	10439	424044	MVP	https://phenomics.va.ornl.gov/web/cipher/pheweb	https://www.science.org/doi/10.1126/science.adj1761	MVP_R4.1000G_AGR.Phe_276_4.EUR.GIA.dbGaP.txt.gz_ldsc	1741323351668EUR_vtg.txt.gz
0.1193	0.03953	3.019	0.002538	0.03404	0.002002	1.214	0.01176	-0.008701	0.006948	Congestive heart failure (CHF) NOS	431695	41922	389773	MVP	https://phenomics.va.ornl.gov/web/cipher/pheweb	https://www.science.org/doi/10.1126/science.adj2127	MVP_R4.1000G_AGR.Phe_428_1.EUR.GIA.dbGaP.txt.gz_ldsc	1741323351668EUR_vtg.txt.gz
0.1314	0.04354	3.018	0.002541	0.02153	0.001844	1.05	0.008766	0.001942	0.005841	Destinations on discharge from hospital (recoded): Usual Place of residence	361058	232634	128424	UK Biobank	https://docs.google.com/spreadsheets/d/1kvPoupSzsSFBNSztMzl04xMoSC3Kcx3CrjVf4yBmESU/edit?ts=5b5f17db#gid=227859291	PHESANT Transformation:41248_0 || CAT-MUL-BINARY-VAR 1000 || ALL || Removed 136 examples != 1000 but with missing value (<0) || sample 128424/232634(361058) ||-Notes:This field is a summary of the distinct destination on discharge codes a participant has had recorded across all their episodes in hospital. Destination on discharge identifies whether a patient was due to return to their usual place…	binary.41248_1000.txt	1741323351668EUR_vtg.txt.gz
0.2445	0.08126	3.009	0.00262	0.005082	0.001398	1.068	0.008379	-0.0005512	0.006008	Abnormal electrocardiogram [ECG] [EKG]	408101	30167	377934	MVP	https://phenomics.va.ornl.gov/web/cipher/pheweb	https://www.science.org/doi/10.1126/science.adj2104	MVP_R4.1000G_AGR.Phe_426_7.EUR.GIA.dbGaP.txt.gz_ldsc	1741323351668EUR_vtg.txt.gz
0.1419	0.04722	3.004	0.002663	0.05676	0.005106	1.024	0.007965	-0.01671	0.006151	Ever sought or received professional help for mental distress	117677	46020	71657	UK Biobank	https://docs.google.com/spreadsheets/d/1kvPoupSzsSFBNSztMzl04xMoSC3Kcx3CrjVf4yBmESU/edit?ts=5b5f17db#gid=227859291	PHESANT Transformation:20499_0|| CAT-SINGLE || Inc(>=10): 0(71657) || Inc(>=10): 1(46020) || CAT-SINGLE-BINARY || sample 71657/46020(117677) ||-Notes:Question asked: In your life, did you seek or receive help from a professional (medical doctor, psychologist, social worker, counsellor, nurse, clergy, or other helping professional) for mental distress, psychological problems or unusual experiences…	binary.20499.txt	1741323351668EUR_vtg.txt.gz
0.2406	0.08011	3.004	0.002666	0.004768	0.001125	1.039	0.007173	-0.01069	0.006738	Rotator cuff (capsule) sprain	441696	9764	431932	MVP	https://phenomics.va.ornl.gov/web/cipher/pheweb	https://www.science.org/doi/10.1126/science.adj2775	MVP_R4.1000G_AGR.Phe_840_2.EUR.GIA.dbGaP.txt.gz_ldsc	1741323351668EUR_vtg.txt.gz
0.1882	0.06272	3.001	0.002689	0.01018	0.001602	1.008	0.007585	0.0003363	0.006202	Mineral and other dietary supplements: Calcium	360016	24026	335990	UK Biobank	https://docs.google.com/spreadsheets/d/1kvPoupSzsSFBNSztMzl04xMoSC3Kcx3CrjVf4yBmESU/edit?ts=5b5f17db#gid=227859291	PHESANT Transformation:6179_0 || CAT-MUL-BINARY-VAR 3 || NO_NAN Remove NA participants 514 || Removed 664 examples != 3 but with missing value (<0) || sample 335990/24026(360016) ||-Notes:ACE touchscreen question Do you regularly take any of the following? (You can select more than one answer) The following checks were performed: If code -7 was selected, then no additional choices were allowed. I…	binary.6179_3.txt	1741323351668EUR_vtg.txt.gz
0.2509	0.08384	2.992	0.002771	0.003844	0.001206	1.051	0.008205	-0.004994	0.005768	Hemorrhage of gastrointestinal tract	435418	14284	421134	MVP	https://phenomics.va.ornl.gov/web/cipher/pheweb	https://www.science.org/doi/10.1126/science.adj2400	MVP_R4.1000G_AGR.Phe_578_9.EUR.GIA.dbGaP.txt.gz_ldsc	1741323351668EUR_vtg.txt.gz
0.115	0.03848	2.989	0.0028	0.03441	0.00259	1.016	0.009019	-0.005062	0.005592	Illnesses of siblings: High blood pressure	281619	58495	223124	UK Biobank	https://docs.google.com/spreadsheets/d/1kvPoupSzsSFBNSztMzl04xMoSC3Kcx3CrjVf4yBmESU/edit?ts=5b5f17db#gid=227859291	PHESANT Transformation:20111_0 || CAT-MUL-BINARY-VAR 8 || NO_NAN Remove NA participants 52692 || Removed 26883 examples != 8 but with missing value (<0) || sample 223124/58495(281619) ||-Notes:This field contains the combined results of 2 ACE touchscreen questions, both asked Have any of your brothers or sisters suffered from any of the following diseases? (You can select more than one answer) fo…	binary.20111_8.txt	1741323351668EUR_vtg.txt.gz
0.137	0.04594	2.982	0.002861	0.0203	0.005647	1.101	0.01503	-0.008937	0.00699	Vitamin deficiency	409645	90650	318995	MVP	https://phenomics.va.ornl.gov/web/cipher/pheweb	https://www.science.org/doi/10.1126/science.adj1723	MVP_R4.1000G_AGR.Phe_261.EUR.GIA.dbGaP.txt.gz_ldsc	1741323351668EUR_vtg.txt.gz
0.1133	0.03803	2.979	0.002889	0.02526	0.001937	1.152	0.01041	-0.001079	0.006237	Other diseases of the teeth and supporting structures	421141	82431	338710	MVP (EUR)	https://ftp.ncbi.nlm.nih.gov/dbgap/studies/phs002453/analyses/GIA/	Phe_525. PheCodes_Digestive System	MVP_R4.1000G_AGR.Phe_525.EUR.GIA.dbGaP.txt.gz.ctg	1741323351668EUR_vtg.txt.gz
0.1132	0.03804	2.976	0.002919	0.02526	0.001938	1.152	0.01041	-0.001041	0.006244	Other diseases of the teeth and supporting structures	421141	82431	338710	MVP	https://phenomics.va.ornl.gov/web/cipher/pheweb	https://www.science.org/doi/10.1126/science.adj2282	MVP_R4.1000G_AGR.Phe_525.EUR.GIA.dbGaP.txt.gz_ldsc	1741323351668EUR_vtg.txt.gz
0.2211	0.07432	2.975	0.002931	0.007524	0.001322	1.052	0.007725	-0.0003455	0.006282	Rheumatoid arthritis and other inflammatory	443288	13760	429528	MVP	https://phenomics.va.ornl.gov/web/cipher/pheweb	https://www.science.org/doi/10.1126/science.adj2608	MVP_R4.1000G_AGR.Phe_714.EUR.GIA.dbGaP.txt.gz_ldsc	1741323351668EUR_vtg.txt.gz
0.1214	0.04088	2.969	0.002989	0.02354	0.001707	1.018	0.008953	0.003862	0.006527	Attendance/disability/mobility allowance: Disability living allowance	358597	15697	342900	UK Biobank	https://docs.google.com/spreadsheets/d/1kvPoupSzsSFBNSztMzl04xMoSC3Kcx3CrjVf4yBmESU/edit?ts=5b5f17db#gid=227859291	PHESANT Transformation:6146_0 || CAT-MUL-BINARY-VAR 2 || NO_NAN Remove NA participants 179 || Removed 2418 examples != 2 but with missing value (<0) || sample 342900/15697(358597) ||-Notes:ACE touchscreen question Do you receive any of the following? (You can select more than one answer) The following checks were performed: If code -7 was selected, then no additional choices were allowed. If code…	binary.6146_2.txt	1741323351668EUR_vtg.txt.gz
0.145	0.04886	2.968	0.002997	0.01464	0.002841	1.14	0.02389	-0.008607	0.006037	Sleep related movement disorders	435255	21024	414231	MVP	https://phenomics.va.ornl.gov/web/cipher/pheweb	https://www.science.org/doi/10.1126/science.adj1892	MVP_R4.1000G_AGR.Phe_327_7.EUR.GIA.dbGaP.txt.gz_ldsc	1741323351668EUR_vtg.txt.gz
0.08685	0.02931	2.963	0.003046	0.03352	0.001678	1.06	0.01574	0.001874	0.007445	Major Depresive Disorder	480359	135458	344901	Psychiatric Genomics Consortium	http://dx.doi.org/10.1038/s41588-018-0090-3		1568940179895depression.ctgvl.input.gz	1741323351668EUR_vtg.txt.gz
0.1155	0.03902	2.961	0.00307	0.0265	0.002472	1.16	0.0132	-0.01171	0.006289	Other aneurysm	439723	24982	414741	MVP	https://phenomics.va.ornl.gov/web/cipher/pheweb	https://www.science.org/doi/10.1126/science.adj2156	MVP_R4.1000G_AGR.Phe_442.EUR.GIA.dbGaP.txt.gz_ldsc	1741323351668EUR_vtg.txt.gz
0.1635	0.05528	2.958	0.003091	0.03444	0.004873	1.012	0.007684	-0.01112	0.00595	Substances taken for anxiety: Medication prescribed to you (for at least two weeks)	98990	12942	86048	UK Biobank	https://docs.google.com/spreadsheets/d/1kvPoupSzsSFBNSztMzl04xMoSC3Kcx3CrjVf4yBmESU/edit?ts=5b5f17db#gid=227859291	PHESANT Transformation:20549_0 || CAT-MUL-BINARY-VAR 3 || Indicator name x20425_0_0 || Remove indicator var NAs: 243128 || Remove indicator var <0: 19076 || Removed 0 examples != 3 but with missing value (<0) || sample 86048/12942(98990) ||-Notes:Question asked: Did you ever use the following for the worry or the problems it caused? (tick all that apply): Participant was offered a set of options …	binary.20549_3.txt	1741323351668EUR_vtg.txt.gz
0.1065	0.03607	2.953	0.003151	0.0355	0.003792	1.169	0.01368	-0.009459	0.007203	Abdominal hernia	416370	71035	345335	MVP (EUR)	https://ftp.ncbi.nlm.nih.gov/dbgap/studies/phs002453/analyses/GIA/	Phe_550. PheCodes_Digestive System	MVP_R4.1000G_AGR.Phe_550.EUR.GIA.dbGaP.txt.gz.ctg	1741323351668EUR_vtg.txt.gz
0.231	0.07824	2.952	0.003156	0.004799	0.001141	1.008	0.007646	-0.01058	0.006402	Secondary hypothyroidism	449467	4220	445247	MVP	https://phenomics.va.ornl.gov/web/cipher/pheweb	https://www.science.org/doi/10.1126/science.adj1675	MVP_R4.1000G_AGR.Phe_244_1.EUR.GIA.dbGaP.txt.gz_ldsc	1741323351668EUR_vtg.txt.gz
0.2469	0.08367	2.951	0.003168	0.004635	0.001355	1.087	0.007846	-0.003173	0.005669	Cholelithiasis	439607	18237	421370	MVP	https://phenomics.va.ornl.gov/web/cipher/pheweb	https://www.science.org/doi/10.1126/science.adj2382	MVP_R4.1000G_AGR.Phe_574_1.EUR.GIA.dbGaP.txt.gz_ldsc	1741323351668EUR_vtg.txt.gz
0.1066	0.03612	2.95	0.003177	0.0355	0.003791	1.169	0.01367	-0.009458	0.00722	Abdominal hernia	416370	71035	345335	MVP	https://phenomics.va.ornl.gov/web/cipher/pheweb	https://www.science.org/doi/10.1126/science.adj2331	MVP_R4.1000G_AGR.Phe_550.EUR.GIA.dbGaP.txt.gz_ldsc	1741323351668EUR_vtg.txt.gz
0.2517	0.08537	2.949	0.003193	0.005612	0.00122	1.005	0.007155	-0.01322	0.00623	Episodal and paroxysmal disorders	361194	5418	355776	UK Biobank	https://docs.google.com/spreadsheets/d/1kvPoupSzsSFBNSztMzl04xMoSC3Kcx3CrjVf4yBmESU/edit?ts=5b5f17db#gid=227859291	PHESANT Transformation:NA-Notes:NA-Variable type:categorical-Phenotype ID:G6_EPIPAROX	categorical.G6_EPIPAROX.txt	1741323351668EUR_vtg.txt.gz
-0.1455	0.04942	-2.945	0.00323	0.07413	0.005749	1.023	0.008184	0.001505	0.006034	FI3 : word interpolation	116815	98753	18062	UK Biobank	https://docs.google.com/spreadsheets/d/1kvPoupSzsSFBNSztMzl04xMoSC3Kcx3CrjVf4yBmESU/edit?ts=5b5f17db#gid=227859291	PHESANT Transformation:4957_0|| CAT-SINGLE || reassignments: 1=0|2=0|3=0|4=1|5=0|-1=0 || Inc(>=10): 1(98753) || Inc(>=10): 0(18062) || CAT-SINGLE-BINARY || sample 18062/98753(116815) ||-Notes:ACE touchscreen question Bud is to Flower as Child is to?. Part 3 of Fluid Intelligence test. Offered choice from Grow, Develop, Improve, Adult and Old.-Variable type:binary	binary.4957.txt	1741323351668EUR_vtg.txt.gz
0.1486	0.05052	2.94	0.003278	0.01275	0.001424	1.091	0.009113	-0.003027	0.005697	Arthropathy NOS	415384	34645	380739	MVP	https://phenomics.va.ornl.gov/web/cipher/pheweb	https://www.science.org/doi/10.1126/science.adj2616	MVP_R4.1000G_AGR.Phe_716_9.EUR.GIA.dbGaP.txt.gz_ldsc	1741323351668EUR_vtg.txt.gz
0.1457	0.04957	2.94	0.003281	0.0148	0.001702	1.132	0.009026	-0.008492	0.006074	screening for other diseases and disorders	368745	156707	212038	MVP	https://phenomics.va.ornl.gov/web/cipher/pheweb	https://www.science.org/doi/10.1126/science.adj1546	MVP_R4.1000G_AGR.Phe_1010_3.EUR.GIA.dbGaP.txt.gz_ldsc	1741323351668EUR_vtg.txt.gz
0.2046	0.06962	2.939	0.003298	0.005741	0.001182	1.069	0.007472	-0.007529	0.005664	Other diseases of respiratory system, not elsewhere classified	424288	17452	406836	MVP	https://phenomics.va.ornl.gov/web/cipher/pheweb	https://www.science.org/doi/10.1126/science.adj2263	MVP_R4.1000G_AGR.Phe_519.EUR.GIA.dbGaP.txt.gz_ldsc	1741323351668EUR_vtg.txt.gz
0.1967	0.06696	2.938	0.003306	0.005819	0.001222	1.044	0.007323	0.00254	0.006247	Suppurative and unspecified otitis media	428176	11253	416923	MVP	https://phenomics.va.ornl.gov/web/cipher/pheweb	https://www.science.org/doi/10.1126/science.adj2036	MVP_R4.1000G_AGR.Phe_381_11.EUR.GIA.dbGaP.txt.gz_ldsc	1741323351668EUR_vtg.txt.gz
0.2872	0.09777	2.937	0.00331	0.003581	0.001277	1.009	0.006518	-0.001384	0.005658	Diagnoses - main ICD10: K62 Other diseases of anus and rectum	361194	13882	347312	UK Biobank	https://docs.google.com/spreadsheets/d/1kvPoupSzsSFBNSztMzl04xMoSC3Kcx3CrjVf4yBmESU/edit?ts=5b5f17db#gid=227859291	PHESANT Transformation:NA-Notes:NA-Variable type:categorical-Phenotype ID:K62	categorical.K62.txt	1741323351668EUR_vtg.txt.gz
0.1158	0.03945	2.935	0.003333	0.1358	0.0128	0.9789	0.0217	0.007631	0.007883	Neutrophil percentage of white cells	173507	NA	NA	UK Biobank and INTERVAL	http://www.bloodcellgenetics.org/	Percentage of white cells that are neutrophils	neut_p_N171542_narrow_form.txt.common	1741323351668EUR_vtg.txt.gz
0.18	0.06151	2.926	0.003437	0.03832	0.007025	1.037	0.007808	-0.006212	0.005535	Toothache	461031	18959	442072	UK Biobank	https://data.bris.ac.uk/data/dataset/2j2rqgzedxlq02oqbb4vmycnc2	UK Biobank GWAS on toothache	EUR_toothache.txt.pre_ctgvl.freqs.ctgvl	1741323351668EUR_vtg.txt.gz
0.1769	0.06061	2.919	0.00351	0.009514	0.001259	1.064	0.008669	-0.002522	0.00646	Periodontitis (acute or chronic)	430715	34270	396445	MVP	https://phenomics.va.ornl.gov/web/cipher/pheweb	https://www.science.org/doi/10.1126/science.adj2277	MVP_R4.1000G_AGR.Phe_523_3.EUR.GIA.dbGaP.txt.gz_ldsc	1741323351668EUR_vtg.txt.gz
0.1768	0.06059	2.918	0.003519	0.00951	0.00126	1.064	0.008663	-0.002528	0.006466	Periodontitis (acute or chronic)	430715	34270	396445	MVP (EUR)	https://ftp.ncbi.nlm.nih.gov/dbgap/studies/phs002453/analyses/GIA/	Phe_523_3. PheCodes_Digestive System	MVP_R4.1000G_AGR.Phe_523_3.EUR.GIA.dbGaP.txt.gz.ctg	1741323351668EUR_vtg.txt.gz
0.2241	0.07691	2.914	0.003571	0.006712	0.001229	1.058	0.008028	-0.003524	0.005881	Gastritis and duodenitis	415784	20797	394987	MVP (EUR)	https://ftp.ncbi.nlm.nih.gov/dbgap/studies/phs002453/analyses/GIA/	Phe_535. PheCodes_Digestive System	MVP_R4.1000G_AGR.Phe_535.EUR.GIA.dbGaP.txt.gz.ctg	1741323351668EUR_vtg.txt.gz
-0.08456	0.02903	-2.913	0.003584	0.1063	0.003742	1.089	0.02478	-0.01269	0.008578	Educational Attainment	766000	NA	NA	SSGAC	https://www.thessgac.org/data	Educational attainment (EA) meta-analysis of all discovery cohorts except 23andMe.	EDUCATION_ATTAINMENT.Lee_et_al_2018.txt	1741323351668EUR_vtg.txt.gz
0.2239	0.07687	2.912	0.003589	0.006713	0.001228	1.058	0.00802	-0.003472	0.005873	Gastritis and duodenitis	415784	20797	394987	MVP	https://phenomics.va.ornl.gov/web/cipher/pheweb	https://www.science.org/doi/10.1126/science.adj2316	MVP_R4.1000G_AGR.Phe_535.EUR.GIA.dbGaP.txt.gz_ldsc	1741323351668EUR_vtg.txt.gz
0.1161	0.03994	2.908	0.003637	0.0429	0.002309	1.192	0.01093	-0.01786	0.006733	Pain in joint	398498	270046	128452	MVP	https://phenomics.va.ornl.gov/web/cipher/pheweb	https://www.science.org/doi/10.1126/science.adj2694	MVP_R4.1000G_AGR.Phe_745.EUR.GIA.dbGaP.txt.gz_ldsc	1741323351668EUR_vtg.txt.gz
-0.1054	0.0363	-2.905	0.003677	0.211	0.01117	1.076	0.01366	-0.005346	0.007031	Fluid intelligence score	117131	NA	NA	UK Biobank	https://docs.google.com/spreadsheets/d/1kvPoupSzsSFBNSztMzl04xMoSC3Kcx3CrjVf4yBmESU/edit?ts=5b5f17db#gid=227859291	PHESANT Transformation:20016_0|| INTEGER || CONTINUOUS || ||-Notes:This is a simple unweighted sum of the number of correct answers given to the 13 fluid intelligence questions. Participants who did not answer all of the questions within the allotted 2 minute limit are scored as zero for each of the unattempted questions.-Variable type:continuous_raw	20016_raw.txt	1741323351668EUR_vtg.txt.gz
0.2275	0.07853	2.897	0.003766	0.006294	0.001397	1.093	0.008562	-0.009474	0.006373	Inflammatory diseases of prostate	395400	19654	375746	MVP	https://phenomics.va.ornl.gov/web/cipher/pheweb	https://www.science.org/doi/10.1126/science.adj2459	MVP_R4.1000G_AGR.Phe_601.EUR.GIA.dbGaP.txt.gz_ldsc	1741323351668EUR_vtg.txt.gz
0.1885	0.06512	2.895	0.003792	0.007119	0.00137	1.091	0.008917	-0.005497	0.006033	Other disorders of the kidney and ureters	420835	29694	391141	MVP	https://phenomics.va.ornl.gov/web/cipher/pheweb	https://www.science.org/doi/10.1126/science.adj2421	MVP_R4.1000G_AGR.Phe_586.EUR.GIA.dbGaP.txt.gz_ldsc	1741323351668EUR_vtg.txt.gz
0.1074	0.03711	2.894	0.003802	0.04121	0.002236	1.264	0.01215	-0.008127	0.007057	Congestive heart failure; nonhypertensive	429672	58749	370923	MVP	https://phenomics.va.ornl.gov/web/cipher/pheweb	https://www.science.org/doi/10.1126/science.adj2126	MVP_R4.1000G_AGR.Phe_428.EUR.GIA.dbGaP.txt.gz_ldsc	1741323351668EUR_vtg.txt.gz
0.1585	0.05479	2.893	0.003817	0.01068	0.001432	1.118	0.009321	-0.00387	0.00583	Arrhythmia (cardiac) NOS	413895	32162	381733	MVP	https://phenomics.va.ornl.gov/web/cipher/pheweb	https://www.science.org/doi/10.1126/science.adj2120	MVP_R4.1000G_AGR.Phe_427_5.EUR.GIA.dbGaP.txt.gz_ldsc	1741323351668EUR_vtg.txt.gz
0.2096	0.07246	2.892	0.003826	0.005714	0.001055	1.051	0.007433	-0.01289	0.005866	Osteoarthrosis, generalized	433263	18307	414956	MVP	https://phenomics.va.ornl.gov/web/cipher/pheweb	https://www.science.org/doi/10.1126/science.adj2677	MVP_R4.1000G_AGR.Phe_740_2.EUR.GIA.dbGaP.txt.gz_ldsc	1741323351668EUR_vtg.txt.gz
0.1199	0.04171	2.875	0.004037	0.02632	0.001886	1.191	0.00985	-0.003984	0.006621	Cataract	405674	230624	175050	MVP	https://phenomics.va.ornl.gov/web/cipher/pheweb	https://www.science.org/doi/10.1126/science.adj1979	MVP_R4.1000G_AGR.Phe_366.EUR.GIA.dbGaP.txt.gz_ldsc	1741323351668EUR_vtg.txt.gz
0.145	0.05057	2.867	0.004142	0.01163	0.001454	1.094	0.008012	-0.002989	0.005766	Hypotension NOS	421599	22869	398730	MVP	https://phenomics.va.ornl.gov/web/cipher/pheweb	https://www.science.org/doi/10.1126/science.adj2188	MVP_R4.1000G_AGR.Phe_458_9.EUR.GIA.dbGaP.txt.gz_ldsc	1741323351668EUR_vtg.txt.gz
0.1879	0.06554	2.867	0.004143	0.00735	0.001547	1.099	0.008393	-0.0005039	0.005838	Cholelithiasis and cholecystitis	439813	23182	416631	MVP	https://phenomics.va.ornl.gov/web/cipher/pheweb	https://www.science.org/doi/10.1126/science.adj2381	MVP_R4.1000G_AGR.Phe_574.EUR.GIA.dbGaP.txt.gz_ldsc	1741323351668EUR_vtg.txt.gz
0.13	0.04543	2.862	0.004211	0.01712	0.003237	1.146	0.02772	-0.009512	0.005907	Restless legs syndrome	443920	15475	428445	MVP	https://phenomics.va.ornl.gov/web/cipher/pheweb	https://www.science.org/doi/10.1126/science.adj1893	MVP_R4.1000G_AGR.Phe_327_71.EUR.GIA.dbGaP.txt.gz_ldsc	1741323351668EUR_vtg.txt.gz
0.3747	0.1311	2.859	0.004252	0.003168	0.001605	1.009	0.007666	0.01223	0.005764	Takes medication for Crohn's disease?	315668	1952	313716	MVP	https://phenomics.va.ornl.gov/web/cipher/pheweb	https://www.science.org/doi/10.1126/science.adj1328	MVP_R4.1000G_AGR.GICrohnMed.EUR.GIA.dbGaP.txt.gz_ldsc	1741323351668EUR_vtg.txt.gz
0.126	0.04409	2.858	0.004269	0.01875	0.001689	1.021	0.008327	0.005748	0.00581	Diagnoses - main ICD10: R07 Pain in throat and chest	361194	24530	336664	UK Biobank	https://docs.google.com/spreadsheets/d/1kvPoupSzsSFBNSztMzl04xMoSC3Kcx3CrjVf4yBmESU/edit?ts=5b5f17db#gid=227859291	PHESANT Transformation:NA-Notes:NA-Variable type:categorical-Phenotype ID:R07	categorical.R07.txt	1741323351668EUR_vtg.txt.gz
0.1243	0.0435	2.857	0.004272	0.02051	0.001792	1.037	0.008401	-0.002674	0.005721	Pain type(s) experienced in last month: Hip pain	360391	40500	319891	UK Biobank	https://docs.google.com/spreadsheets/d/1kvPoupSzsSFBNSztMzl04xMoSC3Kcx3CrjVf4yBmESU/edit?ts=5b5f17db#gid=227859291	PHESANT Transformation:6159_0 || CAT-MUL-BINARY-VAR 6 || NO_NAN Remove NA participants 180 || Removed 623 examples != 6 but with missing value (<0) || sample 319891/40500(360391) ||-Notes:ACE touchscreen question In the last month have you experienced any of the following that interfered with your usual activites? (You can select more than one answer) The following checks were performed: If code …	binary.6159_6.txt	1741323351668EUR_vtg.txt.gz
0.127	0.0446	2.848	0.0044	0.02244	0.001813	1.042	0.008573	0.01062	0.006329	Major dietary changes in the last 5 years: Yes, because of illness	360294	38051	322243	UK Biobank	https://docs.google.com/spreadsheets/d/1kvPoupSzsSFBNSztMzl04xMoSC3Kcx3CrjVf4yBmESU/edit?ts=5b5f17db#gid=227859291	PHESANT Transformation:1538_0 || CAT-SINGLE || CAT-SINGLE-BINARY-VAR: 1 || Inc(>=10): 1(38051) ||-Notes:ACE touchscreen question Have you made any major changes to your diet in the last 5 years?-Variable type:binary	binary.1538_1.txt	1741323351668EUR_vtg.txt.gz
0.155	0.05447	2.846	0.004426	0.01138	0.001498	1.078	0.008877	-0.00647	0.005521	Inflammation of eyelids	406693	37507	369186	MVP	https://phenomics.va.ornl.gov/web/cipher/pheweb	https://www.science.org/doi/10.1126/science.adj2008	MVP_R4.1000G_AGR.Phe_371_3.EUR.GIA.dbGaP.txt.gz_ldsc	1741323351668EUR_vtg.txt.gz
0.1522	0.0535	2.845	0.004448	0.01322	0.001758	1.008	0.007677	-0.005085	0.005154	Illnesses of siblings: Severe depression	279858	20107	259751	UK Biobank	https://docs.google.com/spreadsheets/d/1kvPoupSzsSFBNSztMzl04xMoSC3Kcx3CrjVf4yBmESU/edit?ts=5b5f17db#gid=227859291	PHESANT Transformation:20111_0 || CAT-MUL-BINARY-VAR 12 || NO_NAN Remove NA participants 52692 || Removed 28645 examples != 12 but with missing value (<0) || sample 259751/20107(279858) ||-Notes:This field contains the combined results of 2 ACE touchscreen questions, both asked Have any of your brothers or sisters suffered from any of the following diseases? (You can select more than one answer) …	binary.20111_12.txt	1741323351668EUR_vtg.txt.gz
0.1999	0.07047	2.836	0.004566	0.007769	0.001297	1.05	0.007131	-0.002457	0.006098	Rheumatoid arthritis	446640	10479	436161	MVP	https://phenomics.va.ornl.gov/web/cipher/pheweb	https://www.science.org/doi/10.1126/science.adj2609	MVP_R4.1000G_AGR.Phe_714_1.EUR.GIA.dbGaP.txt.gz_ldsc	1741323351668EUR_vtg.txt.gz
0.1242	0.04383	2.834	0.004592	0.02832	0.002519	1.22	0.0139	-0.009217	0.007411	Other anemias	410220	83995	326225	MVP	https://phenomics.va.ornl.gov/web/cipher/pheweb	https://www.science.org/doi/10.1126/science.adj1792	MVP_R4.1000G_AGR.Phe_285.EUR.GIA.dbGaP.txt.gz_ldsc	1741323351668EUR_vtg.txt.gz
0.3386	0.1195	2.832	0.004619	0.002162	0.00102	1.009	0.006892	-0.01801	0.005067	Thyroiditis	449740	1904	447836	MVP	https://phenomics.va.ornl.gov/web/cipher/pheweb	https://www.science.org/doi/10.1126/science.adj1678	MVP_R4.1000G_AGR.Phe_245.EUR.GIA.dbGaP.txt.gz_ldsc	1741323351668EUR_vtg.txt.gz
0.08454	0.02987	2.83	0.004657	0.05443	0.004742	1.194	0.01566	0.004442	0.006272	Takes medication for coronary artery/ coronary heart disease?	315668	44681	270987	MVP	https://phenomics.va.ornl.gov/web/cipher/pheweb	https://www.science.org/doi/10.1126/science.adj1232	MVP_R4.1000G_AGR.CircCADMed.EUR.GIA.dbGaP.txt.gz_ldsc	1741323351668EUR_vtg.txt.gz
0.1305	0.04616	2.828	0.00469	0.02124	0.001509	1.069	0.008552	-0.00772	0.006234	Sprains and strains	396469	50648	345821	MVP	https://phenomics.va.ornl.gov/web/cipher/pheweb	https://www.science.org/doi/10.1126/science.adj2774	MVP_R4.1000G_AGR.Phe_840.EUR.GIA.dbGaP.txt.gz_ldsc	1741323351668EUR_vtg.txt.gz
0.16	0.0566	2.827	0.004696	0.0118	0.001787	1.017	0.008875	-0.0004422	0.005554	Non-cancer illness code, self-reported: osteoporosis	361141	5736	355405	UK Biobank	https://docs.google.com/spreadsheets/d/1kvPoupSzsSFBNSztMzl04xMoSC3Kcx3CrjVf4yBmESU/edit?ts=5b5f17db#gid=227859291	PHESANT Transformation:20002_0 || CAT-MUL-BINARY-VAR 1309 || Indicator name x135_0_0 || Remove indicator var NAs: 53 || Remove indicator var <0: 0 || Removed 0 examples != 1309 but with missing value (<0) || sample 355405/5736(361141) ||-Notes:Code for non-cancer illness. If the participant was uncertain of the type of illness they had had, then they described it to the interviewer (a trained nur…	binary.20002_1309.txt	1741323351668EUR_vtg.txt.gz
0.1078	0.03825	2.819	0.004818	0.03494	0.002104	1.142	0.01088	-0.01418	0.007022	Peripheral enthesopathies and allied syndromes	391459	105189	286270	MVP	https://phenomics.va.ornl.gov/web/cipher/pheweb	https://www.science.org/doi/10.1126/science.adj2634	MVP_R4.1000G_AGR.Phe_726.EUR.GIA.dbGaP.txt.gz_ldsc	1741323351668EUR_vtg.txt.gz
0.1833	0.06505	2.818	0.00484	0.006406	0.001307	1.014	0.007035	0.0003625	0.005446	Factors influencing health status and contact with health services	361194	45947	315247	UK Biobank	https://docs.google.com/spreadsheets/d/1kvPoupSzsSFBNSztMzl04xMoSC3Kcx3CrjVf4yBmESU/edit?ts=5b5f17db#gid=227859291	PHESANT Transformation:NA-Notes:NA-Variable type:categorical-Phenotype ID:XXI_HEALTHFACTORS	categorical.XXI_HEALTHFACTORS.txt	1741323351668EUR_vtg.txt.gz
-0.102	0.03625	-2.812	0.004917	0.1317	0.01207	1.508	0.02741	-0.009988	0.0097	lymphocyte (fraction, mean, inv-norm transformed)	290958	NA	NA	MVP	https://phenomics.va.ornl.gov/web/cipher/pheweb	https://www.science.org/doi/10.1126/science.adj1399	MVP_R4.1000G_AGR.Lymph_Fra_Mean_INT.EUR.GIA.dbGaP.txt.gz_ldsc	1741323351668EUR_vtg.txt.gz
0.1295	0.04628	2.799	0.005133	0.02135	0.001777	1.199	0.009962	-0.004495	0.00672	Dry eyes	398636	84262	314374	MVP	https://phenomics.va.ornl.gov/web/cipher/pheweb	https://www.science.org/doi/10.1126/science.adj2016	MVP_R4.1000G_AGR.Phe_375_1.EUR.GIA.dbGaP.txt.gz_ldsc	1741323351668EUR_vtg.txt.gz
-0.08823	0.03157	-2.795	0.00519	0.1898	0.008006	1.068	0.01862	-0.004747	0.008316	Cognitive Performance	257841	NA	NA	SSGAC	https://www.thessgac.org/data	Cognitive Performance (CP) meta-analysis of all discovery cohorts.	COGNITIVE_PERFORMANCE.Lee_et_al_2018.txt	1741323351668EUR_vtg.txt.gz
0.1246	0.04465	2.792	0.005245	0.05098	0.004762	1.025	0.00814	-0.01282	0.005468	Ever suffered mental distress preventing usual activities	116527	38681	77846	UK Biobank	https://docs.google.com/spreadsheets/d/1kvPoupSzsSFBNSztMzl04xMoSC3Kcx3CrjVf4yBmESU/edit?ts=5b5f17db#gid=227859291	PHESANT Transformation:20500_0|| CAT-SINGLE || Inc(>=10): 0(77846) || Inc(>=10): 1(38681) || CAT-SINGLE-BINARY || sample 77846/38681(116527) ||-Notes:Question asked: In your life, have you suffered from a period of mental distress that prevented you from doing your usual activities?-Variable type:binary	binary.20500.txt	1741323351668EUR_vtg.txt.gz
0.1711	0.0615	2.781	0.005415	0.01134	0.001474	1.025	0.007874	-0.0005529	0.006385	Ever had bowel cancer screening	355353	114475	240878	UK Biobank	https://docs.google.com/spreadsheets/d/1kvPoupSzsSFBNSztMzl04xMoSC3Kcx3CrjVf4yBmESU/edit?ts=5b5f17db#gid=227859291	PHESANT Transformation:2345_0|| CAT-SINGLE || Inc(>=10): 1(114475) || Inc(>=10): 0(240878) || CAT-SINGLE-BINARY || sample 240878/114475(355353) ||-Notes:ACE touchscreen question Have you ever had a screening test for bowel (colorectal) cancer? (Please include tests for blood in the stool/faeces or a colonoscopy or a sigmoidoscopy) If the participant activated the Help button they were shown the m…	binary.2345.txt	1741323351668EUR_vtg.txt.gz
0.08381	0.03027	2.768	0.005635	0.05462	0.00301	1.031	0.0119	-0.001939	0.006316	Number of incorrect matches in round	360686	NA	NA	UK Biobank	https://docs.google.com/spreadsheets/d/1kvPoupSzsSFBNSztMzl04xMoSC3Kcx3CrjVf4yBmESU/edit?ts=5b5f17db#gid=227859291	PHESANT Transformation:399_0|| INTEGER || CONTINUOUS || ||-Notes:A value of 0 indicates the participant made no mistakes.-Variable type:continuous_raw	399_raw.txt	1741323351668EUR_vtg.txt.gz
0.1795	0.06486	2.768	0.005642	0.03085	0.005249	1.014	0.007989	-0.00683	0.005516	Workplace very dusty: Often	89631	9561	80070	UK Biobank	https://docs.google.com/spreadsheets/d/1kvPoupSzsSFBNSztMzl04xMoSC3Kcx3CrjVf4yBmESU/edit?ts=5b5f17db#gid=227859291	PHESANT Transformation:22609_0 || CAT-MUL-BINARY-VAR 2 || NO_NAN Remove NA participants 270347 || Removed 1217 examples != 2 but with missing value (<0) || sample 80070/9561(89631) ||-Notes:Participant asked Thinking about the place where you worked: Was it very dusty? Participants were allowed to skip answering this question.-Variable type:binary	binary.22609_2.txt	1741323351668EUR_vtg.txt.gz
0.2173	0.0786	2.765	0.005692	0.003772	0.0009929	1.002	0.007277	-0.007258	0.005659	Temporomandibular joint disorders	441610	5123	436487	MVP	https://phenomics.va.ornl.gov/web/cipher/pheweb	https://www.science.org/doi/10.1126/science.adj2286	MVP_R4.1000G_AGR.Phe_526_4.EUR.GIA.dbGaP.txt.gz_ldsc	1741323351668EUR_vtg.txt.gz
-0.07353	0.02659	-2.765	0.005694	0.1857	0.009894	1.847	0.04146	0.0285	0.01028	systolic blood pressure (SBP, mean, inv-normal transformed)	425740	NA	NA	MVP	https://phenomics.va.ornl.gov/web/cipher/pheweb	https://www.science.org/doi/10.1126/science.adj2909	MVP_R4.1000G_AGR.Systolic_Mean_INT.EUR.GIA.dbGaP.txt.gz_ldsc	1741323351668EUR_vtg.txt.gz
0.3508	0.1269	2.765	0.005696	0.002443	0.001054	1.046	0.007804	-0.01272	0.005588	Fluid overload	443589	4586	439003	MVP	https://phenomics.va.ornl.gov/web/cipher/pheweb	https://www.science.org/doi/10.1126/science.adj1765	MVP_R4.1000G_AGR.Phe_276_6.EUR.GIA.dbGaP.txt.gz_ldsc	1741323351668EUR_vtg.txt.gz
0.2171	0.07857	2.764	0.005714	0.003774	0.000993	1.002	0.007277	-0.007262	0.005656	Temporomandibular joint disorders	441610	5123	436487	MVP (EUR)	https://ftp.ncbi.nlm.nih.gov/dbgap/studies/phs002453/analyses/GIA/	Phe_526_4. PheCodes_Digestive System	MVP_R4.1000G_AGR.Phe_526_4.EUR.GIA.dbGaP.txt.gz.ctg	1741323351668EUR_vtg.txt.gz
-0.09018	0.03274	-2.754	0.005881	0.07954	0.005286	1.44	0.02199	0.0162	0.007606	bicarbonate (minimum, inv-norm transformed)	412527	NA	NA	MVP	https://phenomics.va.ornl.gov/web/cipher/pheweb	https://www.science.org/doi/10.1126/science.adj1203	MVP_R4.1000G_AGR.Bicarbonate_Min_INT.EUR.GIA.dbGaP.txt.gz_ldsc	1741323351668EUR_vtg.txt.gz
0.1625	0.05919	2.745	0.006057	0.01157	0.001951	1.036	0.009303	0.001861	0.006008	Treatment/medication code: atorvastatin	361141	10805	350336	UK Biobank	https://docs.google.com/spreadsheets/d/1kvPoupSzsSFBNSztMzl04xMoSC3Kcx3CrjVf4yBmESU/edit?ts=5b5f17db#gid=227859291	PHESANT Transformation:20003_0 || CAT-MUL-BINARY-VAR 1141146234 || Indicator name x137_0_0 || Remove indicator var NAs: 53 || Remove indicator var <0: 0 || Removed 0 examples != 1141146234 but with missing value (<0) || sample 350336/10805(361141) ||-Notes:Code for treatment Negative codes indicate free-text entry.-Variable type:binary	binary.20003_1141146234.txt	1741323351668EUR_vtg.txt.gz
0.1441	0.05254	2.743	0.006086	0.05042	0.005218	1	0.008055	-0.01243	0.006332	Ever felt worried, tense, or anxious for most of a month or longer	110315	29351	80964	UK Biobank	https://docs.google.com/spreadsheets/d/1kvPoupSzsSFBNSztMzl04xMoSC3Kcx3CrjVf4yBmESU/edit?ts=5b5f17db#gid=227859291	PHESANT Transformation:20421_0|| CAT-SINGLE || Inc(>=10): 1(29351) || Inc(>=10): 0(80964) || CAT-SINGLE-BINARY || sample 80964/29351(110315) ||-Notes:Question asked: Have you ever had a period lasting one month or longer when most of the time you felt worried, tense, or anxious?-Variable type:binary	binary.20421.txt	1741323351668EUR_vtg.txt.gz
0.1226	0.04488	2.732	0.006302	0.0166	0.001899	1.095	0.01043	-0.0002456	0.006545	Diverticulitis	439248	10900	428348	MVP	https://phenomics.va.ornl.gov/web/cipher/pheweb	https://www.science.org/doi/10.1126/science.adj2356	MVP_R4.1000G_AGR.Phe_562_2.EUR.GIA.dbGaP.txt.gz_ldsc	1741323351668EUR_vtg.txt.gz
0.1191	0.04372	2.725	0.006435	0.01871	0.001695	1.128	0.009599	-0.001325	0.006532	Dysphagia	424472	57069	367403	MVP (EUR)	https://ftp.ncbi.nlm.nih.gov/dbgap/studies/phs002453/analyses/GIA/	Phe_532. PheCodes_Digestive System	MVP_R4.1000G_AGR.Phe_532.EUR.GIA.dbGaP.txt.gz.ctg	1741323351668EUR_vtg.txt.gz
0.1205	0.04421	2.725	0.00644	0.0403	0.003478	1.022	0.009316	-0.006598	0.00601	Ever used hormone-replacement therapy (HRT)	193606	76179	117427	UK Biobank	https://docs.google.com/spreadsheets/d/1kvPoupSzsSFBNSztMzl04xMoSC3Kcx3CrjVf4yBmESU/edit?ts=5b5f17db#gid=227859291	PHESANT Transformation:2814_0|| CAT-SINGLE || Inc(>=10): 1(76179) || Inc(>=10): 0(117427) || CAT-SINGLE-BINARY || sample 117427/76179(193606) ||-Notes:ACE touchscreen question Have you ever used hormone replacement therapy (HRT)?-Variable type:binary	binary.2814.txt	1741323351668EUR_vtg.txt.gz
0.1189	0.04368	2.722	0.006483	0.0187	0.001696	1.128	0.009596	-0.00129	0.006519	Dysphagia	424472	57069	367403	MVP	https://phenomics.va.ornl.gov/web/cipher/pheweb	https://www.science.org/doi/10.1126/science.adj2315	MVP_R4.1000G_AGR.Phe_532.EUR.GIA.dbGaP.txt.gz_ldsc	1741323351668EUR_vtg.txt.gz
0.09316	0.03423	2.721	0.006502	0.1259	0.0103	1.342	0.03588	0.0003984	0.01013	Total protein	366758	366758	NA	UK Biobank (EUR)	https://pan-ukb-us-east-1.s3.amazonaws.com/sumstats_flat_files/biomarkers-30860-both_sexes-irnt.tsv.bgz	EUR: biomarkers : 30860 : Biological samples > Assay results > Blood assays > Blood biochemistry	biomarkers-30860-both_sexes-irnt.tsv.bgz	1741323351668EUR_vtg.txt.gz
0.2322	0.08557	2.714	0.006649	0.004662	0.001303	0.9984	0.007393	-0.005554	0.005496	Diagnoses - main ICD10: Z09 Follow-up examination after treatment for conditions other than malignant neoplasms	361194	8464	352730	UK Biobank	https://docs.google.com/spreadsheets/d/1kvPoupSzsSFBNSztMzl04xMoSC3Kcx3CrjVf4yBmESU/edit?ts=5b5f17db#gid=227859291	PHESANT Transformation:NA-Notes:NA-Variable type:categorical-Phenotype ID:Z09	categorical.Z09.txt	1741323351668EUR_vtg.txt.gz
0.1933	0.07143	2.707	0.006799	0.03513	0.007746	1.011	0.008079	-0.01433	0.005308	Professional informed about depression	66302	42728	23574	UK Biobank	https://docs.google.com/spreadsheets/d/1kvPoupSzsSFBNSztMzl04xMoSC3Kcx3CrjVf4yBmESU/edit?ts=5b5f17db#gid=227859291	PHESANT Transformation:20448_0|| CAT-SINGLE || Inc(>=10): 1(42728) || Inc(>=10): 0(23574) || CAT-SINGLE-BINARY || sample 23574/42728(66302) ||-Notes:Question asked: Did you ever tell a professional about these problems (medical doctor, psychologist, social worker, counsellor, nurse, clergy, or other helping professional)? Question was asked when ~F20446~ was Yes or ~F20441~ was Yes.-Variable type…	binary.20448.txt	1741323351668EUR_vtg.txt.gz
0.2915	0.1078	2.703	0.00687	0.002703	0.001015	1.025	0.007057	-0.004123	0.005456	Flatulence	436852	5831	431021	MVP	https://phenomics.va.ornl.gov/web/cipher/pheweb	https://www.science.org/doi/10.1126/science.adj2353	MVP_R4.1000G_AGR.Phe_561_2.EUR.GIA.dbGaP.txt.gz_ldsc	1741323351668EUR_vtg.txt.gz
0.1968	0.07288	2.701	0.006923	0.005733	0.001275	1.007	0.006731	-0.01451	0.005513	Mouth/teeth dental problems: Painful gums	359841	10115	349726	UK Biobank	https://docs.google.com/spreadsheets/d/1kvPoupSzsSFBNSztMzl04xMoSC3Kcx3CrjVf4yBmESU/edit?ts=5b5f17db#gid=227859291	PHESANT Transformation:6149_0 || CAT-MUL-BINARY-VAR 2 || NO_NAN Remove NA participants 512 || Removed 841 examples != 2 but with missing value (<0) || sample 349726/10115(359841) ||-Notes:ACE touchscreen question Do you have any of the following? (You can select more than one answer) The following checks were performed: If code -7 was selected, then no additional choices were allowed. If code -3 …	binary.6149_2.txt	1741323351668EUR_vtg.txt.gz
0.1013	0.03754	2.699	0.006953	0.02991	0.002019	1.052	0.008559	0.001255	0.005937	Leisure/social activities: None of the above	360063	108704	251359	UK Biobank	https://docs.google.com/spreadsheets/d/1kvPoupSzsSFBNSztMzl04xMoSC3Kcx3CrjVf4yBmESU/edit?ts=5b5f17db#gid=227859291	PHESANT Transformation:6160_0 || CAT-MUL-BINARY-VAR 100 || NO_NAN Remove NA participants 177 || Removed 954 examples != 100 but with missing value (<0) || sample 251359/108704(360063) ||-Notes:ACE touchscreen question Which of the following do you attend once a week or more often? (You can select more than one) The following checks were performed: If code -7 was selected, then no additional choic…	binary.6160_100.txt	1741323351668EUR_vtg.txt.gz
0.2046	0.0758	2.699	0.006953	0.00381	0.001042	1.009	0.007715	-0.008347	0.005501	Ganglion and cyst of synovium, tendon, and bursa	441688	8083	433605	MVP	https://phenomics.va.ornl.gov/web/cipher/pheweb	https://www.science.org/doi/10.1126/science.adj2642	MVP_R4.1000G_AGR.Phe_727_4.EUR.GIA.dbGaP.txt.gz_ldsc	1741323351668EUR_vtg.txt.gz
0.2671	0.09906	2.696	0.00702	0.003849	0.001447	1.014	0.00769	-0.01296	0.005788	Non-cancer illness code, self-reported: nasal polyps	361141	1587	359554	UK Biobank	https://docs.google.com/spreadsheets/d/1kvPoupSzsSFBNSztMzl04xMoSC3Kcx3CrjVf4yBmESU/edit?ts=5b5f17db#gid=227859291	PHESANT Transformation:20002_0 || CAT-MUL-BINARY-VAR 1417 || Indicator name x135_0_0 || Remove indicator var NAs: 53 || Remove indicator var <0: 0 || Removed 0 examples != 1417 but with missing value (<0) || sample 359554/1587(361141) ||-Notes:Code for non-cancer illness. If the participant was uncertain of the type of illness they had had, then they described it to the interviewer (a trained nur…	binary.20002_1417.txt	1741323351668EUR_vtg.txt.gz
0.1665	0.06177	2.696	0.007026	0.006294	0.001161	1.048	0.007553	-0.007652	0.005287	Paroxysmal ventricular tachycardia	443961	7990	435971	MVP	https://phenomics.va.ornl.gov/web/cipher/pheweb	https://www.science.org/doi/10.1126/science.adj2112	MVP_R4.1000G_AGR.Phe_427_12.EUR.GIA.dbGaP.txt.gz_ldsc	1741323351668EUR_vtg.txt.gz
0.1007	0.03741	2.693	0.007085	0.02865	0.00204	1.178	0.01046	-0.00036	0.006737	Degeneration of intervertebral disc	411151	58556	352595	MVP	https://phenomics.va.ornl.gov/web/cipher/pheweb	https://www.science.org/doi/10.1126/science.adj2625	MVP_R4.1000G_AGR.Phe_722_6.EUR.GIA.dbGaP.txt.gz_ldsc	1741323351668EUR_vtg.txt.gz
0.1541	0.05728	2.69	0.007149	0.01195	0.001861	1.074	0.01306	-0.002492	0.006213	Pulmonary embolism and infarction, acute	447859	10863	436996	MVP	https://phenomics.va.ornl.gov/web/cipher/pheweb	https://www.science.org/doi/10.1126/science.adj2079	MVP_R4.1000G_AGR.Phe_415_11.EUR.GIA.dbGaP.txt.gz_ldsc	1741323351668EUR_vtg.txt.gz
-0.09223	0.0343	-2.689	0.007174	0.04866	0.002668	1.06	0.0104	-0.00969	0.006563	Pain type(s) experienced in last month: None of the above	360391	145514	214877	UK Biobank	https://docs.google.com/spreadsheets/d/1kvPoupSzsSFBNSztMzl04xMoSC3Kcx3CrjVf4yBmESU/edit?ts=5b5f17db#gid=227859291	PHESANT Transformation:6159_0 || CAT-MUL-BINARY-VAR 100 || NO_NAN Remove NA participants 180 || Removed 623 examples != 100 but with missing value (<0) || sample 214877/145514(360391) ||-Notes:ACE touchscreen question In the last month have you experienced any of the following that interfered with your usual activites? (You can select more than one answer) The following checks were performed: If …	binary.6159_100.txt	1741323351668EUR_vtg.txt.gz
0.148	0.05505	2.688	0.007194	0.01034	0.001384	1.086	0.008671	-0.005346	0.005858	Bronchitis	412479	19890	392589	MVP	https://phenomics.va.ornl.gov/web/cipher/pheweb	https://www.science.org/doi/10.1126/science.adj2229	MVP_R4.1000G_AGR.Phe_497.EUR.GIA.dbGaP.txt.gz_ldsc	1741323351668EUR_vtg.txt.gz
0.08457	0.03152	2.683	0.007296	0.05437	0.00298	1.047	0.01162	-0.003615	0.006433	Seen doctor (GP) for nerves, anxiety, tension or depression	358693	123528	235165	UK Biobank	https://docs.google.com/spreadsheets/d/1kvPoupSzsSFBNSztMzl04xMoSC3Kcx3CrjVf4yBmESU/edit?ts=5b5f17db#gid=227859291	PHESANT Transformation:2090_0|| CAT-SINGLE || Inc(>=10): 0(235165) || Inc(>=10): 1(123528) || CAT-SINGLE-BINARY || sample 235165/123528(358693) ||-Notes:ACE touchscreen question Have you ever seen a general practitioner (GP) for nerves, anxiety, tension or depression?-Variable type:binary	binary.2090.txt	1741323351668EUR_vtg.txt.gz
-0.06437	0.02403	-2.678	0.0074	0.2088	0.04133	1.23	0.1059	0.01953	0.00904	Urate	400469	400469	NA	UK Biobank (EUR)	https://pan-ukb-us-east-1.s3.amazonaws.com/sumstats_flat_files/biomarkers-30880-both_sexes-irnt.tsv.bgz	EUR: biomarkers : 30880 : Biological samples > Assay results > Blood assays > Blood biochemistry	biomarkers-30880-both_sexes-irnt.tsv.bgz	1741323351668EUR_vtg.txt.gz
-0.1081	0.04038	-2.678	0.007411	0.02893	0.002151	1.029	0.01016	-0.006228	0.006679	Attendance/disability/mobility allowance: None of the above	358597	337879	20718	UK Biobank	https://docs.google.com/spreadsheets/d/1kvPoupSzsSFBNSztMzl04xMoSC3Kcx3CrjVf4yBmESU/edit?ts=5b5f17db#gid=227859291	PHESANT Transformation:6146_0 || CAT-MUL-BINARY-VAR 100 || NO_NAN Remove NA participants 179 || Removed 2418 examples != 100 but with missing value (<0) || sample 20718/337879(358597) ||-Notes:ACE touchscreen question Do you receive any of the following? (You can select more than one answer) The following checks were performed: If code -7 was selected, then no additional choices were allowed. If …	binary.6146_100.txt	1741323351668EUR_vtg.txt.gz
0.1721	0.06428	2.677	0.007422	0.006871	0.001098	1.036	0.00705	-0.0005095	0.005538	Fever of unknown origin	423394	14549	408845	MVP	https://phenomics.va.ornl.gov/web/cipher/pheweb	https://www.science.org/doi/10.1126/science.adj2734	MVP_R4.1000G_AGR.Phe_783.EUR.GIA.dbGaP.txt.gz_ldsc	1741323351668EUR_vtg.txt.gz
0.1529	0.05712	2.677	0.007433	0.0409	0.005504	0.9894	0.007936	-0.007012	0.005538	Back pain for 3+ months	90555	62055	28500	UK Biobank	https://docs.google.com/spreadsheets/d/1kvPoupSzsSFBNSztMzl04xMoSC3Kcx3CrjVf4yBmESU/edit?ts=5b5f17db#gid=227859291	PHESANT Transformation:3571_0|| CAT-SINGLE || Inc(>=10): 1(62055) || Inc(>=10): 0(28500) || CAT-SINGLE-BINARY || sample 28500/62055(90555) ||-Notes:ACE touchscreen question Have you had back pains for more than 3 months? ~F3571~ was collected from participants who indicated that in the last month they experienced back pain that interfered with their usual activities, as defined by their answers t…	binary.3571.txt	1741323351668EUR_vtg.txt.gz
0.1042	0.03898	2.674	0.007488	0.03165	0.004106	1.226	0.01482	-0.004073	0.006836	Encounter for long-term (current) use of anticoagulants	441953	41607	400346	MVP	https://phenomics.va.ornl.gov/web/cipher/pheweb	https://www.science.org/doi/10.1126/science.adj1798	MVP_R4.1000G_AGR.Phe_286_2.EUR.GIA.dbGaP.txt.gz_ldsc	1741323351668EUR_vtg.txt.gz
0.2214	0.08306	2.666	0.007674	0.004302	0.00116	1.039	0.008252	-0.009881	0.005442	Voice disturbance	440137	15502	424635	MVP	https://phenomics.va.ornl.gov/web/cipher/pheweb	https://www.science.org/doi/10.1126/science.adj2202	MVP_R4.1000G_AGR.Phe_473_4.EUR.GIA.dbGaP.txt.gz_ldsc	1741323351668EUR_vtg.txt.gz
0.1664	0.06256	2.659	0.00783	0.009134	0.001591	1.098	0.00961	-0.009298	0.005616	Other disorders of eye	404115	60999	343116	MVP	https://phenomics.va.ornl.gov/web/cipher/pheweb	https://www.science.org/doi/10.1126/science.adj2024	MVP_R4.1000G_AGR.Phe_379.EUR.GIA.dbGaP.txt.gz_ldsc	1741323351668EUR_vtg.txt.gz
0.09622	0.03624	2.655	0.007929	0.03876	0.002693	1.27	0.01411	-0.007968	0.006737	Hyperplasia of prostate	382363	138928	243435	MVP	https://phenomics.va.ornl.gov/web/cipher/pheweb	https://www.science.org/doi/10.1126/science.adj2458	MVP_R4.1000G_AGR.Phe_600.EUR.GIA.dbGaP.txt.gz_ldsc	1741323351668EUR_vtg.txt.gz
0.09179	0.03462	2.651	0.008021	0.6956	0.03904	1.05	0.01042	-0.006751	0.006146	Bipolar Disorder	51710	20352	31358	Psychiatric Genomics Consortium	https://www.med.unc.edu/pgc/results-and-downloads/		daner_PGC_BIP32b_mds7a_0416a.tsv	1741323351668EUR_vtg.txt.gz
0.1009	0.03814	2.645	0.008178	0.15	0.01673	1.552	0.04305	0.0215	0.01021	neutrophil (fraction, mean, inv-norm transformed)	261847	NA	NA	MVP	https://phenomics.va.ornl.gov/web/cipher/pheweb	https://www.science.org/doi/10.1126/science.adj1464	MVP_R4.1000G_AGR.Neut_Fra_Mean_INT.EUR.GIA.dbGaP.txt.gz_ldsc	1741323351668EUR_vtg.txt.gz
0.1001	0.03799	2.634	0.008438	0.02826	0.002655	1.177	0.01393	-0.008489	0.006552	Aortic aneurysm	441700	22049	419651	MVP	https://phenomics.va.ornl.gov/web/cipher/pheweb	https://www.science.org/doi/10.1126/science.adj2157	MVP_R4.1000G_AGR.Phe_442_1.EUR.GIA.dbGaP.txt.gz_ldsc	1741323351668EUR_vtg.txt.gz
0.1492	0.05673	2.631	0.008517	0.009097	0.001327	1.065	0.008867	0.005503	0.006071	Otitis externa	430937	15011	415926	MVP	https://phenomics.va.ornl.gov/web/cipher/pheweb	https://www.science.org/doi/10.1126/science.adj2032	MVP_R4.1000G_AGR.Phe_380_1.EUR.GIA.dbGaP.txt.gz_ldsc	1741323351668EUR_vtg.txt.gz
0.1032	0.03926	2.627	0.008607	0.03134	0.001974	1.133	0.01047	6.84e-05	0.006926	Other dyspnea	387924	73299	314625	MVP	https://phenomics.va.ornl.gov/web/cipher/pheweb	https://www.science.org/doi/10.1126/science.adj2253	MVP_R4.1000G_AGR.Phe_512_9.EUR.GIA.dbGaP.txt.gz_ldsc	1741323351668EUR_vtg.txt.gz
0.1475	0.05621	2.624	0.0087	0.01197	0.001691	1.09	0.009713	-0.00342	0.006791	Erythematous conditions	421291	31200	390091	MVP (EUR)	https://ftp.ncbi.nlm.nih.gov/dbgap/studies/phs002453/analyses/GIA/	Phe_695. PheCodes_Dermatological System	MVP_R4.1000G_AGR.Phe_695.EUR.GIA.dbGaP.txt.gz.ctg	1741323351668EUR_vtg.txt.gz
0.1475	0.05624	2.622	0.008735	0.01197	0.001691	1.09	0.009704	-0.003415	0.006795	Erythematous conditions	421291	31200	390091	MVP	https://phenomics.va.ornl.gov/web/cipher/pheweb	https://www.science.org/doi/10.1126/science.adj2555	MVP_R4.1000G_AGR.Phe_695.EUR.GIA.dbGaP.txt.gz_ldsc	1741323351668EUR_vtg.txt.gz
-0.07918	0.0302	-2.622	0.008743	0.0266	0.006755	0.9867	0.01529	0.01455	0.004406	Pyruvate	95372	NA	NA	UKB (EUR)	https://www.nature.com/articles/s41467-024-52310-9	GCST90446011. NMR	GCST90446011.h.tsv.gz.ctg	1741323351668EUR_vtg.txt.gz
0.1327	0.0507	2.618	0.00884	0.01138	0.001607	1.012	0.008871	0.005457	0.005846	Diagnoses - main ICD10: R10 Abdominal and pelvic pain	361194	20240	340954	UK Biobank	https://docs.google.com/spreadsheets/d/1kvPoupSzsSFBNSztMzl04xMoSC3Kcx3CrjVf4yBmESU/edit?ts=5b5f17db#gid=227859291	PHESANT Transformation:NA-Notes:NA-Variable type:categorical-Phenotype ID:R10	categorical.R10.txt	1741323351668EUR_vtg.txt.gz
0.1426	0.05456	2.613	0.008962	0.01114	0.00131	1.084	0.009468	-0.005052	0.006085	Diabetes type 2 with peripheral circulatory	442724	9957	432767	MVP	https://phenomics.va.ornl.gov/web/cipher/pheweb	https://www.science.org/doi/10.1126/science.adj1693	MVP_R4.1000G_AGR.Phe_250_25.EUR.GIA.dbGaP.txt.gz_ldsc	1741323351668EUR_vtg.txt.gz
0.1432	0.05482	2.612	0.009	0.009915	0.001348	1.091	0.008148	-0.001607	0.006274	Muscle weakness	421115	36513	384602	MVP	https://phenomics.va.ornl.gov/web/cipher/pheweb	https://www.science.org/doi/10.1126/science.adj2727	MVP_R4.1000G_AGR.Phe_772_3.EUR.GIA.dbGaP.txt.gz_ldsc	1741323351668EUR_vtg.txt.gz
0.2601	0.09966	2.61	0.009065	0.002743	0.001028	1.021	0.007356	-0.000683	0.005731	Gastritis and duodenitis, NOS	428876	8968	419908	MVP (EUR)	https://ftp.ncbi.nlm.nih.gov/dbgap/studies/phs002453/analyses/GIA/	Phe_535_9. PheCodes_Digestive System	MVP_R4.1000G_AGR.Phe_535_9.EUR.GIA.dbGaP.txt.gz.ctg	1741323351668EUR_vtg.txt.gz
0.2599	0.09961	2.609	0.009068	0.002746	0.001028	1.021	0.007357	-0.0006679	0.005729	Gastritis and duodenitis, NOS	428876	8968	419908	MVP	https://phenomics.va.ornl.gov/web/cipher/pheweb	https://www.science.org/doi/10.1126/science.adj2321	MVP_R4.1000G_AGR.Phe_535_9.EUR.GIA.dbGaP.txt.gz_ldsc	1741323351668EUR_vtg.txt.gz
0.1391	0.05332	2.608	0.009103	0.01125	0.001652	1.057	0.007392	-0.01237	0.005913	Other circulatory problem	315668	28091	287577	MVP	https://phenomics.va.ornl.gov/web/cipher/pheweb	https://www.science.org/doi/10.1126/science.adj1243	MVP_R4.1000G_AGR.CircOth.EUR.GIA.dbGaP.txt.gz_ldsc	1741323351668EUR_vtg.txt.gz
0.1265	0.04887	2.588	0.009648	0.04038	0.005099	1.008	0.008071	0.001634	0.005949	Periodontitis + loose teeth	506594	36332	470262	UK Biobank +GLIDE	https://data.bris.ac.uk/data/dataset/2j2rqgzedxlq02oqbb4vmycnc2	Single-variant association statistics from GLIDE and UKB were combined using a z-score genome-wide meta-analysis weighted by effective sample size combining periodontitis (ncases = 17,353, ncontrols = 28,210 from seven studies) and loose teeth (ncases = 18,979, ncontrols = 442,052)	perio_looseteeth_combined.ctgvl	1741323351668EUR_vtg.txt.gz
0.1787	0.06915	2.585	0.009746	0.009571	0.00358	1.065	0.013	-0.007527	0.006228	Disorders of mineral metabolism	427480	24136	403344	MVP	https://phenomics.va.ornl.gov/web/cipher/pheweb	https://www.science.org/doi/10.1126/science.adj1748	MVP_R4.1000G_AGR.Phe_275.EUR.GIA.dbGaP.txt.gz_ldsc	1741323351668EUR_vtg.txt.gz
0.1679	0.06514	2.577	0.009952	0.006245	0.001136	1.02	0.007968	-0.002004	0.005653	Cardiomegaly	430518	9691	420827	MVP	https://phenomics.va.ornl.gov/web/cipher/pheweb	https://www.science.org/doi/10.1126/science.adj2082	MVP_R4.1000G_AGR.Phe_416.EUR.GIA.dbGaP.txt.gz_ldsc	1741323351668EUR_vtg.txt.gz
0.08216	0.03188	2.577	0.009964	0.07152	0.006229	1.415	0.02728	0.001151	0.007465	Other chronic ischemic heart disease, unspecified	429794	71808	357986	MVP	https://phenomics.va.ornl.gov/web/cipher/pheweb	https://www.science.org/doi/10.1126/science.adj2073	MVP_R4.1000G_AGR.Phe_411_8.EUR.GIA.dbGaP.txt.gz_ldsc	1741323351668EUR_vtg.txt.gz
0.1574	0.06135	2.565	0.01032	0.00767	0.001199	1.049	0.007974	-0.00585	0.005626	Diseases of pulp and periapical tissues	432880	19400	413480	MVP (EUR)	https://ftp.ncbi.nlm.nih.gov/dbgap/studies/phs002453/analyses/GIA/	Phe_522. PheCodes_Digestive System	MVP_R4.1000G_AGR.Phe_522.EUR.GIA.dbGaP.txt.gz.ctg	1741323351668EUR_vtg.txt.gz
0.1573	0.06136	2.564	0.01034	0.007677	0.001199	1.049	0.007979	-0.005829	0.005627	Diseases of pulp and periapical tissues	432880	19400	413480	MVP	https://phenomics.va.ornl.gov/web/cipher/pheweb	https://www.science.org/doi/10.1126/science.adj2272	MVP_R4.1000G_AGR.Phe_522.EUR.GIA.dbGaP.txt.gz_ldsc	1741323351668EUR_vtg.txt.gz
-0.1004	0.03921	-2.562	0.01042	0.1421	0.01225	1.157	0.03141	-0.006097	0.01051	Lymphocyte percentage	349861	NA	NA	UK Biobank	https://docs.google.com/spreadsheets/d/1kvPoupSzsSFBNSztMzl04xMoSC3Kcx3CrjVf4yBmESU/edit?ts=5b5f17db#gid=227859291	PHESANT Transformation:30180_0|| CONTINUOUS MAIN || CONTINUOUS || ||-Notes:Result of Lymphocytes Percentage assay, performed on blood sample, obtained from UK Biobank assessment centre visit. Lymphocytes (Percentage) is calculated as the proportion of lymphocytes in the leukocytes.-Variable type:continuous_raw	30180_raw.txt	1741323351668EUR_vtg.txt.gz
0.178	0.06956	2.559	0.0105	0.006216	0.001245	1.077	0.007978	-0.01097	0.006193	Sepsis and SIRS	436254	16821	419433	MVP	https://phenomics.va.ornl.gov/web/cipher/pheweb	https://www.science.org/doi/10.1126/science.adj2830	MVP_R4.1000G_AGR.Phe_994.EUR.GIA.dbGaP.txt.gz_ldsc	1741323351668EUR_vtg.txt.gz
0.1107	0.04335	2.553	0.01069	0.02216	0.001669	1.032	0.008775	0.01537	0.006293	Other serious medical condition/disability diagnosed by doctor	354588	72965	281623	UK Biobank	https://docs.google.com/spreadsheets/d/1kvPoupSzsSFBNSztMzl04xMoSC3Kcx3CrjVf4yBmESU/edit?ts=5b5f17db#gid=227859291	PHESANT Transformation:2473_0|| CAT-SINGLE || Inc(>=10): 0(281623) || Inc(>=10): 1(72965) || CAT-SINGLE-BINARY || sample 281623/72965(354588) ||-Notes:ACE touchscreen question Has a doctor ever told you that you have had any other serious medical conditions or disabilities? If the participant activated the Help button they were shown the message: If you are not sure if you have a serious illness …	binary.2473.txt	1741323351668EUR_vtg.txt.gz
0.07625	0.02987	2.552	0.0107	0.1023	0.007411	1.48	0.03066	0.00707	0.00785	Ischemic Heart Disease	417274	141465	275809	MVP	https://phenomics.va.ornl.gov/web/cipher/pheweb	https://www.science.org/doi/10.1126/science.adj2068	MVP_R4.1000G_AGR.Phe_411.EUR.GIA.dbGaP.txt.gz_ldsc	1741323351668EUR_vtg.txt.gz
0.06795	0.02663	2.552	0.01072	0.07571	0.005969	0.9147	0.05472	-0.00685	0.008074	creatinine-based estimated glomerular filtration rate (eGFR)	1201909	1201909	0	CKDGen Consortium	https://ckdgen.imbi.uni-freiburg.de/datasets/Stanzick_2021	https://ckdgen.imbi.uni-freiburg.de/datasets/Stanzick_2021	1706801651650eGFRcrea_GSMR.txt.gz	1741323351668EUR_vtg.txt.gz
0.06272	0.02459	2.551	0.01075	0.2536	0.01102	1.142	0.02769	-0.003043	0.009324	Impedance of whole body	354795	NA	NA	UK Biobank	https://docs.google.com/spreadsheets/d/1kvPoupSzsSFBNSztMzl04xMoSC3Kcx3CrjVf4yBmESU/edit?ts=5b5f17db#gid=227859291	PHESANT Transformation:23106_0|| CONTINUOUS MAIN || CONTINUOUS || ||-Notes:Body composition estimation by impedance measurement. Impedance of whole body. is Range 150 - 1200ohms in 1ohm increments.-Variable type:continuous_raw	23106_raw.txt	1741323351668EUR_vtg.txt.gz
0.2054	0.08056	2.549	0.01079	0.0045	0.001219	1.033	0.008892	-0.008011	0.005681	Leukemia	449666	6503	443163	MVP (EUR)	https://ftp.ncbi.nlm.nih.gov/dbgap/studies/phs002453/analyses/GIA/	Phe_204. PheCodes_Neoplasms	MVP_R4.1000G_AGR.Phe_204.EUR.GIA.dbGaP.txt.gz.ctg	1741323351668EUR_vtg.txt.gz
0.2055	0.08062	2.549	0.0108	0.004499	0.001219	1.033	0.008893	-0.008015	0.005678	Leukemia	449666	6503	443163	MVP	https://phenomics.va.ornl.gov/web/cipher/pheweb	https://www.science.org/doi/10.1126/science.adj1634	MVP_R4.1000G_AGR.Phe_204.EUR.GIA.dbGaP.txt.gz_ldsc	1741323351668EUR_vtg.txt.gz
-0.1486	0.05833	-2.548	0.01084	0.01115	0.001516	1.025	0.007707	0.001365	0.005481	Current employment status: In paid employment or self-employed	359931	205149	154782	UK Biobank	https://docs.google.com/spreadsheets/d/1kvPoupSzsSFBNSztMzl04xMoSC3Kcx3CrjVf4yBmESU/edit?ts=5b5f17db#gid=227859291	PHESANT Transformation:6142_0 || CAT-MUL-BINARY-VAR 1 || NO_NAN Remove NA participants 177 || Removed 1086 examples != 1 but with missing value (<0) || sample 154782/205149(359931) ||-Notes:ACE touchscreen question Which of the following describes your current situation? (You can select more than one answer) The following checks were performed: If code -7 was selected, then no additional choices …	binary.6142_1.txt	1741323351668EUR_vtg.txt.gz
0.2419	0.09512	2.543	0.01099	0.00315	0.00104	1.008	0.007956	-0.006865	0.005578	Raynaud's syndrome	450003	2156	447847	MVP	https://phenomics.va.ornl.gov/web/cipher/pheweb	https://www.science.org/doi/10.1126/science.adj2162	MVP_R4.1000G_AGR.Phe_443_1.EUR.GIA.dbGaP.txt.gz_ldsc	1741323351668EUR_vtg.txt.gz
-0.2782	0.1096	-2.539	0.01112	0.003894	0.002171	1.028	0.02003	0.0106	0.005923	Illnesses of mother: Alzheimer's disease/dementia	331041	28507	302534	UK Biobank	https://docs.google.com/spreadsheets/d/1kvPoupSzsSFBNSztMzl04xMoSC3Kcx3CrjVf4yBmESU/edit?ts=5b5f17db#gid=227859291	PHESANT Transformation:20110_0 || CAT-MUL-BINARY-VAR 10 || NO_NAN Remove NA participants 6165 || Removed 23988 examples != 10 but with missing value (<0) || sample 302534/28507(331041) ||-Notes:This field contains the combined results of 2 ACE touchscreen questions, both asked Has/did your mother ever suffer from? (You can select more than one answer) for different sets of illnesses. For convenie…	binary.20110_10.txt	1741323351668EUR_vtg.txt.gz
0.1122	0.04425	2.537	0.01119	0.0173	0.001579	1.105	0.008937	-0.01509	0.005532	Varicose veins	434680	18481	416199	MVP	https://phenomics.va.ornl.gov/web/cipher/pheweb	https://www.science.org/doi/10.1126/science.adj2177	MVP_R4.1000G_AGR.Phe_454.EUR.GIA.dbGaP.txt.gz_ldsc	1741323351668EUR_vtg.txt.gz
0.1821	0.07179	2.536	0.0112	0.02498	0.005795	1.013	0.007925	-0.00654	0.005835	Workplace had a lot of cigarette smoke from other people smoking: Often	89803	14941	74862	UK Biobank	https://docs.google.com/spreadsheets/d/1kvPoupSzsSFBNSztMzl04xMoSC3Kcx3CrjVf4yBmESU/edit?ts=5b5f17db#gid=227859291	PHESANT Transformation:22611_0 || CAT-MUL-BINARY-VAR 2 || NO_NAN Remove NA participants 270296 || Removed 1096 examples != 2 but with missing value (<0) || sample 74862/14941(89803) || SKIP_val:-121 < 0 ||-Notes:Participant asked Thinking about the place where you worked: Was there a lot of cigarette smoke from other people smoking? Participants were allowed to skip answering this question.-Varia…	binary.22611_2.txt	1741323351668EUR_vtg.txt.gz
0.111	0.04379	2.536	0.01121	0.0253	0.003136	1.04	0.0148	-0.004093	0.006404	Mouth/teeth dental problems: Mouth ulcers	359841	36831	323010	UK Biobank	https://docs.google.com/spreadsheets/d/1kvPoupSzsSFBNSztMzl04xMoSC3Kcx3CrjVf4yBmESU/edit?ts=5b5f17db#gid=227859291	PHESANT Transformation:6149_0 || CAT-MUL-BINARY-VAR 1 || NO_NAN Remove NA participants 512 || Removed 841 examples != 1 but with missing value (<0) || sample 323010/36831(359841) ||-Notes:ACE touchscreen question Do you have any of the following? (You can select more than one answer) The following checks were performed: If code -7 was selected, then no additional choices were allowed. If code -3 …	binary.6149_1.txt	1741323351668EUR_vtg.txt.gz
0.1155	0.04562	2.532	0.01134	0.02679	0.01073	1.137	0.03817	-0.007403	0.006106	Other retinal disorders	412176	88461	323715	MVP	https://phenomics.va.ornl.gov/web/cipher/pheweb	https://www.science.org/doi/10.1126/science.adj1950	MVP_R4.1000G_AGR.Phe_362.EUR.GIA.dbGaP.txt.gz_ldsc	1741323351668EUR_vtg.txt.gz
0.247	0.09765	2.529	0.01143	0.002444	0.001006	1.004	0.006904	-0.004269	0.004754	Rheumatism, unspecified and fibrositis	450584	1732	448852	MVP	https://phenomics.va.ornl.gov/web/cipher/pheweb	https://www.science.org/doi/10.1126/science.adj2649	MVP_R4.1000G_AGR.Phe_729_1.EUR.GIA.dbGaP.txt.gz_ldsc	1741323351668EUR_vtg.txt.gz
0.2897	0.1145	2.529	0.01144	0.002375	0.001012	1.005	0.00685	-0.01071	0.005573	Chronic fatigue syndrome	443093	3891	439202	MVP	https://phenomics.va.ornl.gov/web/cipher/pheweb	https://www.science.org/doi/10.1126/science.adj2750	MVP_R4.1000G_AGR.Phe_798_1.EUR.GIA.dbGaP.txt.gz_ldsc	1741323351668EUR_vtg.txt.gz
0.1726	0.06827	2.527	0.01149	0.007163	0.001246	1.051	0.008131	-0.001998	0.006013	Acute periodontitis	434681	22330	412351	MVP	https://phenomics.va.ornl.gov/web/cipher/pheweb	https://www.science.org/doi/10.1126/science.adj2278	MVP_R4.1000G_AGR.Phe_523_31.EUR.GIA.dbGaP.txt.gz_ldsc	1741323351668EUR_vtg.txt.gz
0.1725	0.06828	2.527	0.01152	0.007153	0.001246	1.051	0.00813	-0.002006	0.006013	Acute periodontitis	434681	22330	412351	MVP (EUR)	https://ftp.ncbi.nlm.nih.gov/dbgap/studies/phs002453/analyses/GIA/	Phe_523_31. PheCodes_Digestive System	MVP_R4.1000G_AGR.Phe_523_31.EUR.GIA.dbGaP.txt.gz.ctg	1741323351668EUR_vtg.txt.gz
0.08185	0.03244	2.523	0.01163	0.05482	0.002624	1.047	0.011	-0.005463	0.006344	Duration to first press of snap-button in each round	358500	NA	NA	UK Biobank	https://docs.google.com/spreadsheets/d/1kvPoupSzsSFBNSztMzl04xMoSC3Kcx3CrjVf4yBmESU/edit?ts=5b5f17db#gid=227859291	PHESANT Transformation:404_0|| INTEGER || CONTINUOUS || ||-Notes:This gives the interval between the cards being displayed and the participant pressing the snap-button to indicate a match. Note that the time is recorded regardless of whether the cards shown formed a matching pair. ~F401~ and ~F402~ need to be compared to determine if the cards were the same. Each pair was displayed for 2 seconds,…	404_raw.txt	1741323351668EUR_vtg.txt.gz
0.1077	0.04269	2.522	0.01167	0.02214	0.001749	1.152	0.008958	-0.008806	0.006395	Presbyopia	390253	211535	178718	MVP	https://phenomics.va.ornl.gov/web/cipher/pheweb	https://www.science.org/doi/10.1126/science.adj1986	MVP_R4.1000G_AGR.Phe_367_4.EUR.GIA.dbGaP.txt.gz_ldsc	1741323351668EUR_vtg.txt.gz
0.1695	0.06735	2.517	0.01183	0.005046	0.001083	1.019	0.007319	-0.004492	0.005326	Other tests	429863	411635	18228	MVP	https://phenomics.va.ornl.gov/web/cipher/pheweb	https://www.science.org/doi/10.1126/science.adj1543	MVP_R4.1000G_AGR.Phe_1010.EUR.GIA.dbGaP.txt.gz_ldsc	1741323351668EUR_vtg.txt.gz
0.1536	0.06104	2.517	0.01185	0.008011	0.001136	1.069	0.007875	-0.01314	0.005704	Orthostatic hypotension	432267	13638	418629	MVP	https://phenomics.va.ornl.gov/web/cipher/pheweb	https://www.science.org/doi/10.1126/science.adj2186	MVP_R4.1000G_AGR.Phe_458_1.EUR.GIA.dbGaP.txt.gz_ldsc	1741323351668EUR_vtg.txt.gz
0.1661	0.06611	2.513	0.01198	0.02453	0.00547	0.9999	0.007678	-0.003248	0.005288	Workplace very hot: Often	90165	10169	79996	UK Biobank	https://docs.google.com/spreadsheets/d/1kvPoupSzsSFBNSztMzl04xMoSC3Kcx3CrjVf4yBmESU/edit?ts=5b5f17db#gid=227859291	PHESANT Transformation:22608_0 || CAT-MUL-BINARY-VAR 2 || NO_NAN Remove NA participants 270293 || Removed 737 examples != 2 but with missing value (<0) || sample 79996/10169(90165) || SKIP_val:-121 < 0 ||-Notes:Participant asked Thinking about the place where you worked: Was it very hot? Participants were allowed to skip answering this question.-Variable type:binary	binary.22608_2.txt	1741323351668EUR_vtg.txt.gz
0.1872	0.07448	2.513	0.01198	0.00574	0.001189	1.028	0.007884	-0.0036	0.005887	Premature beats	434418	8991	425427	MVP	https://phenomics.va.ornl.gov/web/cipher/pheweb	https://www.science.org/doi/10.1126/science.adj2121	MVP_R4.1000G_AGR.Phe_427_6.EUR.GIA.dbGaP.txt.gz_ldsc	1741323351668EUR_vtg.txt.gz
0.1221	0.04864	2.511	0.01203	0.01719	0.001831	1.112	0.008874	0.009796	0.005789	Hospital episode type: General episode	361194	246807	114387	UK Biobank	https://docs.google.com/spreadsheets/d/1kvPoupSzsSFBNSztMzl04xMoSC3Kcx3CrjVf4yBmESU/edit?ts=5b5f17db#gid=227859291	PHESANT Transformation:41231_0 || CAT-MUL-BINARY-VAR 1 || ALL || Removed 0 examples != 1 but with missing value (<0) || sample 114387/246807(361194) ||-Notes:This field is a summary of the distinct episode type codes a participant has had recorded across all their episodes in hospital. Hospital episode type identifies whether the period of care in hospital was a general episode or a psychiatric e…	binary.41231_1.txt	1741323351668EUR_vtg.txt.gz
0.2206	0.08786	2.51	0.01206	0.003389	0.001095	1.027	0.00793	-0.002912	0.00573	Pulmonary collapse; interstitial and compensatory emphysema	432417	8194	424223	MVP	https://phenomics.va.ornl.gov/web/cipher/pheweb	https://www.science.org/doi/10.1126/science.adj2241	MVP_R4.1000G_AGR.Phe_508.EUR.GIA.dbGaP.txt.gz_ldsc	1741323351668EUR_vtg.txt.gz
0.06058	0.02414	2.509	0.0121	0.2176	0.009225	1.14	0.02443	0.001289	0.008272	Impedance of arm (right)	354792	NA	NA	UK Biobank	https://docs.google.com/spreadsheets/d/1kvPoupSzsSFBNSztMzl04xMoSC3Kcx3CrjVf4yBmESU/edit?ts=5b5f17db#gid=227859291	PHESANT Transformation:23109_0|| CONTINUOUS MAIN || CONTINUOUS || ||-Notes:Body composition estimation by impedance measurement. Impedance of right arm, oh Measured impedance of right arm. Range 150 - 1200 (ohms) in 1 (ohms) increments.-Variable type:continuous_raw	23109_raw.txt	1741323351668EUR_vtg.txt.gz
0.3597	0.1434	2.508	0.01213	0.001921	0.0009856	1.007	0.007553	-0.0105	0.0057	Duodenal ulcer	447447	2419	445028	MVP	https://phenomics.va.ornl.gov/web/cipher/pheweb	https://www.science.org/doi/10.1126/science.adj2313	MVP_R4.1000G_AGR.Phe_531_3.EUR.GIA.dbGaP.txt.gz_ldsc	1741323351668EUR_vtg.txt.gz
0.2178	0.0869	2.506	0.0122	0.00363	0.001081	1.023	0.00718	-0.002893	0.005801	Rheumatic disease of the heart valves	438595	5583	433012	MVP	https://phenomics.va.ornl.gov/web/cipher/pheweb	https://www.science.org/doi/10.1126/science.adj2052	MVP_R4.1000G_AGR.Phe_394.EUR.GIA.dbGaP.txt.gz_ldsc	1741323351668EUR_vtg.txt.gz
0.1012	0.04038	2.506	0.01222	0.02512	0.002434	1.152	0.01271	-0.01259	0.006665	Abdominal aortic aneurysm	443400	16289	427111	MVP	https://phenomics.va.ornl.gov/web/cipher/pheweb	https://www.science.org/doi/10.1126/science.adj2158	MVP_R4.1000G_AGR.Phe_442_11.EUR.GIA.dbGaP.txt.gz_ldsc	1741323351668EUR_vtg.txt.gz
0.3599	0.1436	2.506	0.01222	0.001918	0.000986	1.007	0.007559	-0.01049	0.005696	Duodenal ulcer	447447	2419	445028	MVP (EUR)	https://ftp.ncbi.nlm.nih.gov/dbgap/studies/phs002453/analyses/GIA/	Phe_531_3. PheCodes_Digestive System	MVP_R4.1000G_AGR.Phe_531_3.EUR.GIA.dbGaP.txt.gz.ctg	1741323351668EUR_vtg.txt.gz
0.1182	0.04723	2.503	0.01231	0.01817	0.001582	1.142	0.009867	0.001703	0.006343	Loss of teeth or edentulism	435114	52094	383020	MVP	https://phenomics.va.ornl.gov/web/cipher/pheweb	https://www.science.org/doi/10.1126/science.adj2283	MVP_R4.1000G_AGR.Phe_525_1.EUR.GIA.dbGaP.txt.gz_ldsc	1741323351668EUR_vtg.txt.gz
0.1183	0.04725	2.503	0.01231	0.01817	0.00158	1.142	0.009862	0.001683	0.006345	Loss of teeth or edentulism	435114	52094	383020	MVP (EUR)	https://ftp.ncbi.nlm.nih.gov/dbgap/studies/phs002453/analyses/GIA/	Phe_525_1. PheCodes_Digestive System	MVP_R4.1000G_AGR.Phe_525_1.EUR.GIA.dbGaP.txt.gz.ctg	1741323351668EUR_vtg.txt.gz
0.2355	0.09426	2.498	0.01247	0.003312	0.001073	1.006	0.006679	-0.005179	0.005472	Otalgia	430403	7449	422954	MVP	https://phenomics.va.ornl.gov/web/cipher/pheweb	https://www.science.org/doi/10.1126/science.adj2038	MVP_R4.1000G_AGR.Phe_382.EUR.GIA.dbGaP.txt.gz_ldsc	1741323351668EUR_vtg.txt.gz
0.1424	0.05703	2.496	0.01256	0.01196	0.001845	1.073	0.01313	-0.002423	0.006248	Acute pulmonary heart disease	447635	11037	436598	MVP	https://phenomics.va.ornl.gov/web/cipher/pheweb	https://www.science.org/doi/10.1126/science.adj2078	MVP_R4.1000G_AGR.Phe_415_1.EUR.GIA.dbGaP.txt.gz_ldsc	1741323351668EUR_vtg.txt.gz
0.1595	0.06413	2.488	0.01285	0.03725	0.005988	1.018	0.008692	-0.006806	0.005711	Workplace very cold: Sometimes	90500	42823	47677	UK Biobank	https://docs.google.com/spreadsheets/d/1kvPoupSzsSFBNSztMzl04xMoSC3Kcx3CrjVf4yBmESU/edit?ts=5b5f17db#gid=227859291	PHESANT Transformation:22607_0 || CAT-MUL-BINARY-VAR 1 || NO_NAN Remove NA participants 270311 || Removed 383 examples != 1 but with missing value (<0) || sample 47677/42823(90500) ||-Notes:Participant asked Thinking about the place where you worked: Was it very cold? Participants were allowed to skip answering this question.-Variable type:binary	binary.22607_1.txt	1741323351668EUR_vtg.txt.gz
0.2305	0.09294	2.48	0.01315	0.003465	0.0009715	1.004	0.007253	-0.005057	0.005874	Other disorders of bone and cartilage	431700	10130	421570	MVP	https://phenomics.va.ornl.gov/web/cipher/pheweb	https://www.science.org/doi/10.1126/science.adj2653	MVP_R4.1000G_AGR.Phe_733.EUR.GIA.dbGaP.txt.gz_ldsc	1741323351668EUR_vtg.txt.gz
0.2367	0.09552	2.478	0.0132	0.003822	0.001438	0.998	0.007272	-0.01223	0.005832	#Polyarthropathies	361194	3275	357919	UK Biobank	https://docs.google.com/spreadsheets/d/1kvPoupSzsSFBNSztMzl04xMoSC3Kcx3CrjVf4yBmESU/edit?ts=5b5f17db#gid=227859291	PHESANT Transformation:NA-Notes:NA-Variable type:categorical-Phenotype ID:M13_POLYARTHROPATHIES	categorical.M13_POLYARTHROPATHIES.txt	1741323351668EUR_vtg.txt.gz
0.09201	0.03719	2.474	0.01336	0.04032	0.002511	1.225	0.01263	0.0002559	0.007184	Intervertebral disc disorders	408566	76841	331725	MVP	https://phenomics.va.ornl.gov/web/cipher/pheweb	https://www.science.org/doi/10.1126/science.adj2623	MVP_R4.1000G_AGR.Phe_722.EUR.GIA.dbGaP.txt.gz_ldsc	1741323351668EUR_vtg.txt.gz
0.1126	0.04556	2.472	0.01344	0.02485	0.002024	1.152	0.01116	-0.01014	0.007391	Acute renal failure	425203	42394	382809	MVP	https://phenomics.va.ornl.gov/web/cipher/pheweb	https://www.science.org/doi/10.1126/science.adj2413	MVP_R4.1000G_AGR.Phe_585_1.EUR.GIA.dbGaP.txt.gz_ldsc	1741323351668EUR_vtg.txt.gz
0.1824	0.07384	2.47	0.01352	0.004659	0.001099	1.075	0.00726	-0.00281	0.005649	Blood in stool	421492	21012	400480	MVP	https://phenomics.va.ornl.gov/web/cipher/pheweb	https://www.science.org/doi/10.1126/science.adj2398	MVP_R4.1000G_AGR.Phe_578_2.EUR.GIA.dbGaP.txt.gz_ldsc	1741323351668EUR_vtg.txt.gz
0.2804	0.1136	2.468	0.01359	0.003022	0.001338	1.08	0.008927	-0.008642	0.006041	Prostatitis	404410	10515	393895	MVP	https://phenomics.va.ornl.gov/web/cipher/pheweb	https://www.science.org/doi/10.1126/science.adj2460	MVP_R4.1000G_AGR.Phe_601_1.EUR.GIA.dbGaP.txt.gz_ldsc	1741323351668EUR_vtg.txt.gz
0.06212	0.02519	2.466	0.01365	0.04032	0.006422	1.117	0.09205	-0.01237	0.004696	Degree of Unsaturation	95372	NA	NA	UKB (EUR)	https://www.nature.com/articles/s41467-024-52310-9	GCST90446080. NMR	GCST90446080.h.tsv.gz.ctg	1741323351668EUR_vtg.txt.gz
0.08232	0.03338	2.466	0.01366	0.07187	0.005797	1.442	0.02264	-0.007481	0.008528	potassium (maximum, inv-norm transformed)	421297	NA	NA	MVP	https://phenomics.va.ornl.gov/web/cipher/pheweb	https://www.science.org/doi/10.1126/science.adj2837	MVP_R4.1000G_AGR.Potas_BSP_Max_INT.EUR.GIA.dbGaP.txt.gz_ldsc	1741323351668EUR_vtg.txt.gz
0.2842	0.1153	2.465	0.01369	0.002278	0.0009935	1.009	0.007016	-0.001748	0.00581	Ileostomy status	450813	1820	448993	MVP	https://phenomics.va.ornl.gov/web/cipher/pheweb	https://www.science.org/doi/10.1126/science.adj2345	MVP_R4.1000G_AGR.Phe_559.EUR.GIA.dbGaP.txt.gz_ldsc	1741323351668EUR_vtg.txt.gz
0.2011	0.08159	2.465	0.01371	0.00425	0.001046	1.026	0.008126	-0.008064	0.00562	Type 1 diabetes with neurological manifestations	447568	3812	443756	MVP	https://phenomics.va.ornl.gov/web/cipher/pheweb	https://www.science.org/doi/10.1126/science.adj1687	MVP_R4.1000G_AGR.Phe_250_14.EUR.GIA.dbGaP.txt.gz_ldsc	1741323351668EUR_vtg.txt.gz
0.1687	0.06849	2.463	0.01377	0.005761	0.001332	1.017	0.007409	0.007953	0.005925	Detention categories: Informal, not formally detained	361194	28228	332966	UK Biobank	https://docs.google.com/spreadsheets/d/1kvPoupSzsSFBNSztMzl04xMoSC3Kcx3CrjVf4yBmESU/edit?ts=5b5f17db#gid=227859291	PHESANT Transformation:41215_0 || CAT-MUL-BINARY-VAR 0 || ALL || Removed 0 examples != 0 but with missing value (<0) || sample 332966/28228(361194) ||-Notes:This field is a summary of the distinct detention category codes a participant has had recorded across all their episodes in hospital. Detention category identifies the legislation under which the person was detained. In order to conduct anal…	binary.41215_0.txt	1741323351668EUR_vtg.txt.gz
0.07142	0.02901	2.462	0.01382	0.1058	0.008287	1.481	0.03419	0.005077	0.007866	Coronary atherosclerosis	424341	124302	300039	MVP	https://phenomics.va.ornl.gov/web/cipher/pheweb	https://www.science.org/doi/10.1126/science.adj2072	MVP_R4.1000G_AGR.Phe_411_4.EUR.GIA.dbGaP.txt.gz_ldsc	1741323351668EUR_vtg.txt.gz
0.1509	0.0613	2.461	0.01385	0.005957	0.00117	1.042	0.008004	-0.006056	0.005485	Peripheral autonomic neuropathy	436760	13396	423364	MVP	https://phenomics.va.ornl.gov/web/cipher/pheweb	https://www.science.org/doi/10.1126/science.adj1905	MVP_R4.1000G_AGR.Phe_337_1.EUR.GIA.dbGaP.txt.gz_ldsc	1741323351668EUR_vtg.txt.gz
-0.09008	0.03664	-2.458	0.01396	0.09657	0.009744	1.37	0.02185	0.00769	0.008397	lymphocyte (absolute count, minimum, inv-norm transformed)	253480	NA	NA	MVP	https://phenomics.va.ornl.gov/web/cipher/pheweb	https://www.science.org/doi/10.1126/science.adj1397	MVP_R4.1000G_AGR.Lymph_Abs_Min_INT.EUR.GIA.dbGaP.txt.gz_ldsc	1741323351668EUR_vtg.txt.gz
0.1727	0.07027	2.458	0.01397	0.005837	0.001173	1.064	0.008032	-0.01049	0.006185	Sepsis	437133	15503	421630	MVP	https://phenomics.va.ornl.gov/web/cipher/pheweb	https://www.science.org/doi/10.1126/science.adj2832	MVP_R4.1000G_AGR.Phe_994_2.EUR.GIA.dbGaP.txt.gz_ldsc	1741323351668EUR_vtg.txt.gz
0.1963	0.07998	2.455	0.01411	0.005177	0.001287	1.006	0.007517	0.001811	0.005294	Treatment/medication code: ezetimibe	361141	2132	359009	UK Biobank	https://docs.google.com/spreadsheets/d/1kvPoupSzsSFBNSztMzl04xMoSC3Kcx3CrjVf4yBmESU/edit?ts=5b5f17db#gid=227859291	PHESANT Transformation:20003_0 || CAT-MUL-BINARY-VAR 1141192736 || Indicator name x137_0_0 || Remove indicator var NAs: 53 || Remove indicator var <0: 0 || Removed 0 examples != 1141192736 but with missing value (<0) || sample 359009/2132(361141) ||-Notes:Code for treatment Negative codes indicate free-text entry.-Variable type:binary	binary.20003_1141192736.txt	1741323351668EUR_vtg.txt.gz
0.1482	0.0604	2.453	0.01416	0.05526	0.009305	1.025	0.007403	-0.01147	0.005663	Painful gums	461031	13311	447720	UK Biobank	https://data.bris.ac.uk/data/dataset/2j2rqgzedxlq02oqbb4vmycnc2	UK Biobank GWAS on painful gums	EUR_painfulgums.txt.pre_ctgvl.freqs.ctgvl	1741323351668EUR_vtg.txt.gz
0.1314	0.05362	2.451	0.01423	0.04592	0.004785	1.014	0.008477	0.003815	0.005836	Shortness of breath walking on level ground	118006	12418	105588	UK Biobank	https://docs.google.com/spreadsheets/d/1kvPoupSzsSFBNSztMzl04xMoSC3Kcx3CrjVf4yBmESU/edit?ts=5b5f17db#gid=227859291	PHESANT Transformation:4717_0|| CAT-SINGLE || Inc(>=10): 0(105588) || Inc(>=10): 1(12418) || CAT-SINGLE-BINARY || sample 105588/12418(118006) ||-Notes:ACE touchscreen question Do you get short of breath walking with people of your own age on level ground?-Variable type:binary	binary.4717.txt	1741323351668EUR_vtg.txt.gz
0.08527	0.03482	2.449	0.01433	0.03608	0.002965	1.242	0.0152	-0.002173	0.00666	Myocardial infarction	432053	39074	392979	MVP	https://phenomics.va.ornl.gov/web/cipher/pheweb	https://www.science.org/doi/10.1126/science.adj2070	MVP_R4.1000G_AGR.Phe_411_2.EUR.GIA.dbGaP.txt.gz_ldsc	1741323351668EUR_vtg.txt.gz
0.4419	0.1808	2.445	0.01449	0.001945	0.001358	0.9999	0.008195	0.0189	0.006084	Spondylopathies (FG)	361194	336	360858	UK Biobank	https://docs.google.com/spreadsheets/d/1kvPoupSzsSFBNSztMzl04xMoSC3Kcx3CrjVf4yBmESU/edit?ts=5b5f17db#gid=227859291	PHESANT Transformation:NA-Notes:NA-Variable type:categorical-Phenotype ID:SPONDYLOPATHY_FG	categorical.SPONDYLOPATHY_FG.txt	1741323351668EUR_vtg.txt.gz
0.1697	0.06949	2.442	0.01459	0.006066	0.001103	1.027	0.007415	-0.003876	0.005687	Pulpitis and necrosis of tooth pulp	439347	11523	427824	MVP (EUR)	https://ftp.ncbi.nlm.nih.gov/dbgap/studies/phs002453/analyses/GIA/	Phe_522_1. PheCodes_Digestive System	MVP_R4.1000G_AGR.Phe_522_1.EUR.GIA.dbGaP.txt.gz.ctg	1741323351668EUR_vtg.txt.gz
0.1283	0.05252	2.442	0.01461	0.01613	0.001484	1.034	0.007816	0.004112	0.006087	Medication for pain relief, constipation, heartburn: Omeprazole (e.g. Zanprol)	357084	21464	335620	UK Biobank	https://docs.google.com/spreadsheets/d/1kvPoupSzsSFBNSztMzl04xMoSC3Kcx3CrjVf4yBmESU/edit?ts=5b5f17db#gid=227859291	PHESANT Transformation:6154_0 || CAT-MUL-BINARY-VAR 5 || NO_NAN Remove NA participants 514 || Removed 3596 examples != 5 but with missing value (<0) || sample 335620/21464(357084) ||-Notes:ACE touchscreen question Do you regularly take any of the following? (You can select more than one answer) The following checks were performed: If code -7 was selected, then no additional choices were allowed. …	binary.6154_5.txt	1741323351668EUR_vtg.txt.gz
0.1005	0.04117	2.442	0.01462	0.0228	0.001747	1.096	0.01	0.004084	0.006194	Chronic pain syndrome	435055	26454	408601	MVP	https://phenomics.va.ornl.gov/web/cipher/pheweb	https://www.science.org/doi/10.1126/science.adj1939	MVP_R4.1000G_AGR.Phe_355_1.EUR.GIA.dbGaP.txt.gz_ldsc	1741323351668EUR_vtg.txt.gz
0.1697	0.06956	2.439	0.01471	0.006068	0.001104	1.027	0.007422	-0.00386	0.005698	Pulpitis and necrosis of tooth pulp	439347	11523	427824	MVP	https://phenomics.va.ornl.gov/web/cipher/pheweb	https://www.science.org/doi/10.1126/science.adj2273	MVP_R4.1000G_AGR.Phe_522_1.EUR.GIA.dbGaP.txt.gz_ldsc	1741323351668EUR_vtg.txt.gz
0.1595	0.06541	2.438	0.01477	0.006202	0.001066	1.023	0.007653	-0.006803	0.005599	Chronic periodontitis	437502	19642	417860	MVP (EUR)	https://ftp.ncbi.nlm.nih.gov/dbgap/studies/phs002453/analyses/GIA/	Phe_523_32. PheCodes_Digestive System	MVP_R4.1000G_AGR.Phe_523_32.EUR.GIA.dbGaP.txt.gz.ctg	1741323351668EUR_vtg.txt.gz
0.1595	0.06547	2.436	0.01486	0.006201	0.001065	1.023	0.007644	-0.006779	0.005588	Chronic periodontitis	437502	19642	417860	MVP	https://phenomics.va.ornl.gov/web/cipher/pheweb	https://www.science.org/doi/10.1126/science.adj2279	MVP_R4.1000G_AGR.Phe_523_32.EUR.GIA.dbGaP.txt.gz_ldsc	1741323351668EUR_vtg.txt.gz
0.2685	0.1104	2.432	0.01502	0.002822	0.001122	0.9853	0.006931	-0.01048	0.005793	Treatment/medication code: pantoprazole	361141	659	360482	UK Biobank	https://docs.google.com/spreadsheets/d/1kvPoupSzsSFBNSztMzl04xMoSC3Kcx3CrjVf4yBmESU/edit?ts=5b5f17db#gid=227859291	PHESANT Transformation:20003_0 || CAT-MUL-BINARY-VAR 1140929012 || Indicator name x137_0_0 || Remove indicator var NAs: 53 || Remove indicator var <0: 0 || Removed 0 examples != 1140929012 but with missing value (<0) || sample 360482/659(361141) ||-Notes:Code for treatment Negative codes indicate free-text entry.-Variable type:binary	binary.20003_1140929012.txt	1741323351668EUR_vtg.txt.gz
0.1033	0.04248	2.431	0.01506	0.03292	0.002279	1.2	0.01135	-0.003868	0.006896	Spondylosis and allied disorders	408128	62366	345762	MVP	https://phenomics.va.ornl.gov/web/cipher/pheweb	https://www.science.org/doi/10.1126/science.adj2619	MVP_R4.1000G_AGR.Phe_721.EUR.GIA.dbGaP.txt.gz_ldsc	1741323351668EUR_vtg.txt.gz
0.2217	0.09144	2.424	0.01534	0.01886	0.005462	1.01	0.007248	0.001379	0.005386	Neck/shoulder pain for 3+ months	81276	56156	25120	UK Biobank	https://docs.google.com/spreadsheets/d/1kvPoupSzsSFBNSztMzl04xMoSC3Kcx3CrjVf4yBmESU/edit?ts=5b5f17db#gid=227859291	PHESANT Transformation:3404_0|| CAT-SINGLE || Inc(>=10): 1(56156) || Inc(>=10): 0(25120) || CAT-SINGLE-BINARY || sample 25120/56156(81276) ||-Notes:ACE touchscreen question Have you had neck or shoulder pains for more than 3 months? ~F3404~ was collected from participants who indicated that in the last month they experienced neck or shoulder pain that interfered with their usual activities, as de…	binary.3404.txt	1741323351668EUR_vtg.txt.gz
-0.1498	0.06181	-2.423	0.0154	0.01235	0.001779	1.03	0.008299	0.01017	0.005856	Illnesses of father: None of the above (group 1)	314797	116736	198061	UK Biobank	https://docs.google.com/spreadsheets/d/1kvPoupSzsSFBNSztMzl04xMoSC3Kcx3CrjVf4yBmESU/edit?ts=5b5f17db#gid=227859291	PHESANT Transformation:20107_0 || CAT-MUL-BINARY-VAR 100 || NO_NAN Remove NA participants 9656 || Removed 36741 examples != 100 but with missing value (<0) || sample 198061/116736(314797) ||-Notes:This field contains the combined results of 2 ACE touchscreen questions, both asked Has/did your father ever suffer from? (You can select more than one answer) for different sets of illnesses. For conve…	binary.20107_100.txt	1741323351668EUR_vtg.txt.gz
0.1757	0.07261	2.419	0.01556	0.005609	0.001171	1.03	0.007789	-0.01045	0.005592	Bursitis	434169	13832	420337	MVP	https://phenomics.va.ornl.gov/web/cipher/pheweb	https://www.science.org/doi/10.1126/science.adj2637	MVP_R4.1000G_AGR.Phe_726_3.EUR.GIA.dbGaP.txt.gz_ldsc	1741323351668EUR_vtg.txt.gz
-0.08945	0.03703	-2.416	0.0157	0.06161	0.004612	1.374	0.01922	-0.001199	0.008584	albumin (minimum, inv-norm transformed)	372982	NA	NA	MVP	https://phenomics.va.ornl.gov/web/cipher/pheweb	https://www.science.org/doi/10.1126/science.adj1187	MVP_R4.1000G_AGR.Albumin_Min_INT.EUR.GIA.dbGaP.txt.gz_ldsc	1741323351668EUR_vtg.txt.gz
-0.1312	0.05432	-2.415	0.01576	0.1465	0.01673	1.011	0.008054	0.006136	0.006047	FI9 : concept interpolation	35147	19701	15446	UK Biobank	https://docs.google.com/spreadsheets/d/1kvPoupSzsSFBNSztMzl04xMoSC3Kcx3CrjVf4yBmESU/edit?ts=5b5f17db#gid=227859291	PHESANT Transformation:5556_0|| CAT-SINGLE || reassignments: 1=0|2=0|3=0|4=1|5=0|-1=0 || Inc(>=10): 1(19701) || Inc(>=10): 0(15446) || CAT-SINGLE-BINARY || sample 15446/19701(35147) ||-Notes:ACE touchscreen question Age is to Years as Height is to?. Part 9 of Fluid Intelligence test. Offered choice from Long, Deep, Top, Metres or Tall.-Variable type:binary	binary.5556.txt	1741323351668EUR_vtg.txt.gz
0.1308	0.05427	2.41	0.01596	0.01313	0.001427	1.051	0.008181	-0.004202	0.006098	Disturbance of skin sensation	399899	36685	363214	MVP	https://phenomics.va.ornl.gov/web/cipher/pheweb	https://www.science.org/doi/10.1126/science.adj2547	MVP_R4.1000G_AGR.Phe_687_4.EUR.GIA.dbGaP.txt.gz_ldsc	1741323351668EUR_vtg.txt.gz
0.1539	0.0639	2.409	0.016	0.006281	0.001382	1.01	0.007627	-0.006461	0.005369	Mouth/teeth dental problems: Toothache	359841	14477	345364	UK Biobank	https://docs.google.com/spreadsheets/d/1kvPoupSzsSFBNSztMzl04xMoSC3Kcx3CrjVf4yBmESU/edit?ts=5b5f17db#gid=227859291	PHESANT Transformation:6149_0 || CAT-MUL-BINARY-VAR 5 || NO_NAN Remove NA participants 512 || Removed 841 examples != 5 but with missing value (<0) || sample 345364/14477(359841) || SKIP_val:-3 < 0 ||-Notes:ACE touchscreen question Do you have any of the following? (You can select more than one answer) The following checks were performed: If code -7 was selected, then no additional choices were a…	binary.6149_5.txt	1741323351668EUR_vtg.txt.gz
0.1307	0.05429	2.408	0.01604	0.01313	0.001427	1.051	0.00818	-0.004182	0.006093	Disturbance of skin sensation	399899	36685	363214	MVP (EUR)	https://ftp.ncbi.nlm.nih.gov/dbgap/studies/phs002453/analyses/GIA/	Phe_687_4. PheCodes_Dermatological System	MVP_R4.1000G_AGR.Phe_687_4.EUR.GIA.dbGaP.txt.gz.ctg	1741323351668EUR_vtg.txt.gz
0.2461	0.1022	2.407	0.01608	0.002516	0.001007	1.005	0.007451	-0.00881	0.005936	Temporomandibular joint disorder, unspecified	443748	4099	439649	MVP	https://phenomics.va.ornl.gov/web/cipher/pheweb	https://www.science.org/doi/10.1126/science.adj2287	MVP_R4.1000G_AGR.Phe_526_41.EUR.GIA.dbGaP.txt.gz_ldsc	1741323351668EUR_vtg.txt.gz
0.2458	0.1021	2.406	0.01611	0.002518	0.001008	1.005	0.007458	-0.008808	0.00593	Temporomandibular joint disorder, unspecified	443748	4099	439649	MVP (EUR)	https://ftp.ncbi.nlm.nih.gov/dbgap/studies/phs002453/analyses/GIA/	Phe_526_41. PheCodes_Digestive System	MVP_R4.1000G_AGR.Phe_526_41.EUR.GIA.dbGaP.txt.gz.ctg	1741323351668EUR_vtg.txt.gz
0.1905	0.07927	2.403	0.01625	0.00454	0.0009877	1.02	0.007477	0.004328	0.005896	Infection of the eye	424248	13874	410374	MVP	https://phenomics.va.ornl.gov/web/cipher/pheweb	https://www.science.org/doi/10.1126/science.adj1996	MVP_R4.1000G_AGR.Phe_369.EUR.GIA.dbGaP.txt.gz_ldsc	1741323351668EUR_vtg.txt.gz
0.2396	0.09985	2.4	0.0164	0.004243	0.00141	1.001	0.008029	0.001991	0.005382	Osteoporosis	361194	933	360261	UK Biobank	https://docs.google.com/spreadsheets/d/1kvPoupSzsSFBNSztMzl04xMoSC3Kcx3CrjVf4yBmESU/edit?ts=5b5f17db#gid=227859291	PHESANT Transformation:NA-Notes:NA-Variable type:categorical-Phenotype ID:M13_OSTEOPOROSIS	categorical.M13_OSTEOPOROSIS.txt	1741323351668EUR_vtg.txt.gz
0.1594	0.06645	2.4	0.01641	0.007401	0.001366	1.033	0.008308	-0.007363	0.006117	Nonrheumatic mitral valve disorders	435926	11972	423954	MVP	https://phenomics.va.ornl.gov/web/cipher/pheweb	https://www.science.org/doi/10.1126/science.adj2056	MVP_R4.1000G_AGR.Phe_395_1.EUR.GIA.dbGaP.txt.gz_ldsc	1741323351668EUR_vtg.txt.gz
0.3285	0.137	2.398	0.01649	0.001794	0.001038	1.015	0.007618	-0.003914	0.005507	Disorders of protein plasma/amino-acid transport and metabolism	442829	8103	434726	MVP	https://phenomics.va.ornl.gov/web/cipher/pheweb	https://www.science.org/doi/10.1126/science.adj1730	MVP_R4.1000G_AGR.Phe_270.EUR.GIA.dbGaP.txt.gz_ldsc	1741323351668EUR_vtg.txt.gz
0.06462	0.02697	2.396	0.01657	0.2332	0.01093	1.145	0.02756	-0.007081	0.009815	Impedance of leg (left)	354811	NA	NA	UK Biobank	https://docs.google.com/spreadsheets/d/1kvPoupSzsSFBNSztMzl04xMoSC3Kcx3CrjVf4yBmESU/edit?ts=5b5f17db#gid=227859291	PHESANT Transformation:23108_0|| CONTINUOUS MAIN || CONTINUOUS || ||-Notes:Body composition estimation by impedance measurement. Impedance of left leg, ohm Measured impedance of left leg. Range 150 - 1200 (ohms) in 1 (ohms) increments.-Variable type:continuous_raw	23108_raw.txt	1741323351668EUR_vtg.txt.gz
0.1709	0.07137	2.395	0.01664	0.01916	0.003784	1.008	0.007506	-0.008923	0.005606	Mental health problems ever diagnosed by a professional: Panic attacks	117722	6518	111204	UK Biobank	https://docs.google.com/spreadsheets/d/1kvPoupSzsSFBNSztMzl04xMoSC3Kcx3CrjVf4yBmESU/edit?ts=5b5f17db#gid=227859291	PHESANT Transformation:20544_0 || CAT-MUL-BINARY-VAR 6 || Indicator name x20400_0_0 || Remove indicator var NAs: 243105 || Removed 367 examples != 6 but with missing value (<0) || sample 111204/6518(117722) || SKIP_val:-818 < 0 ||-Notes:Question asked: Have you been diagnosed with one or more of the following mental health problems by a professional, even if you don't have it currently? (tick all…	binary.20544_6.txt	1741323351668EUR_vtg.txt.gz
0.1053	0.04398	2.394	0.01669	0.03005	0.002175	1.191	0.01125	-0.005713	0.00674	Spondylosis without myelopathy	409028	57675	351353	MVP	https://phenomics.va.ornl.gov/web/cipher/pheweb	https://www.science.org/doi/10.1126/science.adj2620	MVP_R4.1000G_AGR.Phe_721_1.EUR.GIA.dbGaP.txt.gz_ldsc	1741323351668EUR_vtg.txt.gz
0.2012	0.08426	2.388	0.01693	0.005099	0.00148	1.015	0.007487	-0.007692	0.004985	Biological Sibling: Bipolar Disorder	315668	9375	306293	MVP	https://phenomics.va.ornl.gov/web/cipher/pheweb	https://www.science.org/doi/10.1126/science.adj2876	MVP_R4.1000G_AGR.SibMHBPD.EUR.GIA.dbGaP.txt.gz_ldsc	1741323351668EUR_vtg.txt.gz
-0.07177	0.0301	-2.385	0.0171	0.1941	0.01641	1.384	0.06497	0.00919	0.009944	Creatinine	400761	400761	NA	UK Biobank (EUR)	https://pan-ukb-us-east-1.s3.amazonaws.com/sumstats_flat_files/biomarkers-30700-both_sexes-irnt.tsv.bgz	EUR: biomarkers : 30700 : Biological samples > Assay results > Blood assays > Blood biochemistry	biomarkers-30700-both_sexes-irnt.tsv.bgz	1741323351668EUR_vtg.txt.gz
0.1061	0.04464	2.377	0.01748	0.01733	0.001551	1.105	0.009041	-0.001145	0.005675	Other arthropathies	408371	45516	362855	MVP	https://phenomics.va.ornl.gov/web/cipher/pheweb	https://www.science.org/doi/10.1126/science.adj2613	MVP_R4.1000G_AGR.Phe_716.EUR.GIA.dbGaP.txt.gz_ldsc	1741323351668EUR_vtg.txt.gz
0.1828	0.077	2.375	0.01757	0.006081	0.001082	1.025	0.007906	-0.01234	0.006112	Neuralgia, neuritis, and radiculitis NOS	431474	12432	419042	MVP	https://phenomics.va.ornl.gov/web/cipher/pheweb	https://www.science.org/doi/10.1126/science.adj2718	MVP_R4.1000G_AGR.Phe_766.EUR.GIA.dbGaP.txt.gz_ldsc	1741323351668EUR_vtg.txt.gz
-0.0603	0.0254	-2.374	0.01762	0.1118	0.005138	1.102	0.01535	-0.002019	0.006641	Hand grip strength (left)	359704	NA	NA	UK Biobank	https://docs.google.com/spreadsheets/d/1kvPoupSzsSFBNSztMzl04xMoSC3Kcx3CrjVf4yBmESU/edit?ts=5b5f17db#gid=227859291	PHESANT Transformation:46_0|| INTEGER || CONTINUOUS || ||-Notes:Left grip strength-Variable type:continuous_raw	46_raw.txt	1741323351668EUR_vtg.txt.gz
-0.0697	0.02939	-2.371	0.01772	0.1601	0.005987	1.14	0.01904	-0.007295	0.00865	Qualifications: College or University degree	357549	115981	241568	UK Biobank	https://docs.google.com/spreadsheets/d/1kvPoupSzsSFBNSztMzl04xMoSC3Kcx3CrjVf4yBmESU/edit?ts=5b5f17db#gid=227859291	PHESANT Transformation:6138_0 || CAT-MUL-BINARY-VAR 1 || NO_NAN Remove NA participants 510 || Removed 3135 examples != 1 but with missing value (<0) || sample 241568/115981(357549) ||-Notes:ACE touchscreen question Which of the following qualifications do you have? (You can select more than one) The following checks were performed: If code -7 was selected, then no additional choices were allowed.…	binary.6138_1.txt	1741323351668EUR_vtg.txt.gz
0.1526	0.06444	2.369	0.01785	0.01063	0.00165	0.9942	0.008387	-0.00969	0.005762	Treatment/medication code: seretide 50 evohaler	361141	4269	356872	UK Biobank	https://docs.google.com/spreadsheets/d/1kvPoupSzsSFBNSztMzl04xMoSC3Kcx3CrjVf4yBmESU/edit?ts=5b5f17db#gid=227859291	PHESANT Transformation:20003_0 || CAT-MUL-BINARY-VAR 1141176832 || Indicator name x137_0_0 || Remove indicator var NAs: 53 || Remove indicator var <0: 0 || Removed 0 examples != 1141176832 but with missing value (<0) || sample 356872/4269(361141) ||-Notes:Code for treatment Negative codes indicate free-text entry.-Variable type:binary	binary.20003_1141176832.txt	1741323351668EUR_vtg.txt.gz
0.1046	0.04417	2.368	0.01787	0.04897	0.005231	1.039	0.01281	0.002203	0.006752	Medication for cholesterol, blood pressure, diabetes, or take exogenous hormones: Cholesterol lowering medication	193148	24247	168901	UK Biobank	https://docs.google.com/spreadsheets/d/1kvPoupSzsSFBNSztMzl04xMoSC3Kcx3CrjVf4yBmESU/edit?ts=5b5f17db#gid=227859291	PHESANT Transformation:6153_0 || CAT-MUL-BINARY-VAR 1 || NO_NAN Remove NA participants 167294 || Removed 752 examples != 1 but with missing value (<0) || sample 168901/24247(193148) ||-Notes:ACE touchscreen question Do you regularly take any of the following medications? (You can select more than one answer) The following checks were performed: If code -7 was selected, then no additional choices …	binary.6153_1.txt	1741323351668EUR_vtg.txt.gz
0.2118	0.08945	2.368	0.01788	0.004346	0.001252	1.005	0.006737	0.002119	0.005441	Treatment/medication code: citalopram	361141	6185	354956	UK Biobank	https://docs.google.com/spreadsheets/d/1kvPoupSzsSFBNSztMzl04xMoSC3Kcx3CrjVf4yBmESU/edit?ts=5b5f17db#gid=227859291	PHESANT Transformation:20003_0 || CAT-MUL-BINARY-VAR 1140921600 || Indicator name x137_0_0 || Remove indicator var NAs: 53 || Remove indicator var <0: 0 || Removed 0 examples != 1140921600 but with missing value (<0) || sample 354956/6185(361141) ||-Notes:Code for treatment Negative codes indicate free-text entry.-Variable type:binary	binary.20003_1140921600.txt	1741323351668EUR_vtg.txt.gz
-0.07406	0.03129	-2.367	0.01792	0.1212	0.01268	1.155	0.04904	0.01988	0.009094	Immature reticulocyte fraction	344728	NA	NA	UK Biobank	https://docs.google.com/spreadsheets/d/1kvPoupSzsSFBNSztMzl04xMoSC3Kcx3CrjVf4yBmESU/edit?ts=5b5f17db#gid=227859291	PHESANT Transformation:30280_0|| CONTINUOUS MAIN || CONTINUOUS || ||-Notes:Result of Immature Reticulocytes Fraction assay, performed on blood sample, obtained from UK Biobank assessment centre visit. Immature Reticulocytes Fraction (Percentage) is an indication of new reticulocyte synthesis and is calculated from the reticulocytes (Percentage) as the total number of reticulocyte events in the ou…	30280_raw.txt	1741323351668EUR_vtg.txt.gz
0.1183	0.05001	2.365	0.01803	0.1447	0.0214	1.047	0.01238	-0.001218	0.006807	Atopic Dermatitis	864982	60653	804329	European individuals	https://www.ebi.ac.uk/gwas/studies/GCST90244787	GWAS meta-analysis of 864982 European (Estonia, Spain, Sweden, Netherlands, U.S., Norway, Finland, Denmark, U.K., Australia, Switzerland, Germany) individuals	1708626196792GCST90244787_buildGRCh37.tsv.maf.ctg.gz	1741323351668EUR_vtg.txt.gz
-0.2476	0.1047	-2.364	0.01807	0.01838	0.006935	1.009	0.007921	0.01831	0.005813	Depression possibly related to stressful or traumatic event	66334	48490	17844	UK Biobank	https://docs.google.com/spreadsheets/d/1kvPoupSzsSFBNSztMzl04xMoSC3Kcx3CrjVf4yBmESU/edit?ts=5b5f17db#gid=227859291	PHESANT Transformation:20447_0|| CAT-SINGLE || Inc(>=10): 1(48490) || Inc(>=10): 0(17844) || CAT-SINGLE-BINARY || sample 17844/48490(66334) ||-Notes:Question asked: Did this worst period start within two months of the death of someone close to you or after a stressful or traumatic event in your life? Question was asked when ~F20446~ was Yes or ~F20441~ was Yes.-Variable type:binary	binary.20447.txt	1741323351668EUR_vtg.txt.gz
0.2006	0.08494	2.361	0.01821	0.006018	0.00165	1.02	0.01022	0.00294	0.006468	Non-cancer illness code, self-reported: psoriasis	361141	4192	356949	UK Biobank	https://docs.google.com/spreadsheets/d/1kvPoupSzsSFBNSztMzl04xMoSC3Kcx3CrjVf4yBmESU/edit?ts=5b5f17db#gid=227859291	PHESANT Transformation:20002_0 || CAT-MUL-BINARY-VAR 1453 || Indicator name x135_0_0 || Remove indicator var NAs: 53 || Remove indicator var <0: 0 || Removed 0 examples != 1453 but with missing value (<0) || sample 356949/4192(361141) ||-Notes:Code for non-cancer illness. If the participant was uncertain of the type of illness they had had, then they described it to the interviewer (a trained nur…	binary.20002_1453.txt	1741323351668EUR_vtg.txt.gz
0.138	0.05849	2.359	0.01831	0.008317	0.001475	1.087	0.01201	-0.01255	0.005815	Cirrhosis of liver without mention of alcohol	447231	13367	433864	MVP	https://phenomics.va.ornl.gov/web/cipher/pheweb	https://www.science.org/doi/10.1126/science.adj2371	MVP_R4.1000G_AGR.Phe_571_51.EUR.GIA.dbGaP.txt.gz_ldsc	1741323351668EUR_vtg.txt.gz
-0.1485	0.06301	-2.357	0.0184	0.003189	0.0005373	1.035	0.009633	-3.11e-05	0.005987	Acute appendicitis (AcApp) (All Biobanks)	1108469	32706	1075763	Global Biobank Meta-analysis Initiative Meta-analysis Initiative: powering genetic discovery across human diseases. 2025	https://www.globalbiobankmeta.org/resources	https://www.sciencedirect.com/science/article/pii/S2666979X22001410?via%3Dihub	AcApp_Bothsex_inv_var_meta_GBMI_052021_nbbkgt1.txt.gz.ctgvl	1741323351668EUR_vtg.txt.gz
0.1511	0.06412	2.357	0.01843	0.006659	0.001407	0.9995	0.00774	-0.003133	0.005424	Illness, injury, bereavement, stress in last 2 years: Death of a close relative	358836	75305	283531	UK Biobank	https://docs.google.com/spreadsheets/d/1kvPoupSzsSFBNSztMzl04xMoSC3Kcx3CrjVf4yBmESU/edit?ts=5b5f17db#gid=227859291	PHESANT Transformation:6145_0 || CAT-MUL-BINARY-VAR 3 || NO_NAN Remove NA participants 512 || Removed 1846 examples != 3 but with missing value (<0) || sample 283531/75305(358836) ||-Notes:ACE touchscreen question In the last 2 years have you experienced any of the following? (You can select more than one answer) The following checks were performed: If code -7 was selected, then no additional cho…	binary.6145_3.txt	1741323351668EUR_vtg.txt.gz
0.2435	0.1033	2.357	0.01843	0.002244	0.0009601	1.015	0.006946	-0.006174	0.005727	Separation of retinal layers	449417	1738	447679	MVP	https://phenomics.va.ornl.gov/web/cipher/pheweb	https://www.science.org/doi/10.1126/science.adj1959	MVP_R4.1000G_AGR.Phe_362_31.EUR.GIA.dbGaP.txt.gz_ldsc	1741323351668EUR_vtg.txt.gz
0.1544	0.06576	2.348	0.01887	0.008267	0.001156	1.093	0.00831	-0.01169	0.006331	Septicemia	435913	22268	413645	MVP	https://phenomics.va.ornl.gov/web/cipher/pheweb	https://www.science.org/doi/10.1126/science.adj1511	MVP_R4.1000G_AGR.Phe_038.EUR.GIA.dbGaP.txt.gz_ldsc	1741323351668EUR_vtg.txt.gz
0.09746	0.04151	2.348	0.01888	0.03897	0.005211	1.29	0.03283	-0.01549	0.008213	Seborrheic keratosis	392469	88990	303479	MVP	https://phenomics.va.ornl.gov/web/cipher/pheweb	https://www.science.org/doi/10.1126/science.adj2575	MVP_R4.1000G_AGR.Phe_702_2.EUR.GIA.dbGaP.txt.gz_ldsc	1741323351668EUR_vtg.txt.gz
0.07409	0.03156	2.347	0.01891	0.05432	0.00289	1.062	0.01194	0.003602	0.006324	Time to complete round	354739	NA	NA	UK Biobank	https://docs.google.com/spreadsheets/d/1kvPoupSzsSFBNSztMzl04xMoSC3Kcx3CrjVf4yBmESU/edit?ts=5b5f17db#gid=227859291	PHESANT Transformation:400_0|| INTEGER || reassignments: 0=NA || CONTINUOUS || ||-Notes:-Variable type:continuous_raw	400_raw.txt	1741323351668EUR_vtg.txt.gz
0.09735	0.04147	2.347	0.01892	0.03898	0.00521	1.29	0.03282	-0.01549	0.008224	Seborrheic keratosis	392469	88990	303479	MVP (EUR)	https://ftp.ncbi.nlm.nih.gov/dbgap/studies/phs002453/analyses/GIA/	Phe_702_2. PheCodes_Dermatological System	MVP_R4.1000G_AGR.Phe_702_2.EUR.GIA.dbGaP.txt.gz.ctg	1741323351668EUR_vtg.txt.gz
-0.07747	0.03302	-2.346	0.01896	0.06713	0.004476	1.415	0.01967	0.01058	0.008051	sodium (minimum, inv-norm transformed)	421073	NA	NA	MVP	https://phenomics.va.ornl.gov/web/cipher/pheweb	https://www.science.org/doi/10.1126/science.adj2907	MVP_R4.1000G_AGR.Sodium_BSP_Min_INT.EUR.GIA.dbGaP.txt.gz_ldsc	1741323351668EUR_vtg.txt.gz
0.1081	0.04606	2.346	0.01897	0.01644	0.001579	1.105	0.008043	-0.003642	0.006266	Acquired toe deformities	427971	33159	394812	MVP	https://phenomics.va.ornl.gov/web/cipher/pheweb	https://www.science.org/doi/10.1126/science.adj2660	MVP_R4.1000G_AGR.Phe_735_2.EUR.GIA.dbGaP.txt.gz_ldsc	1741323351668EUR_vtg.txt.gz
0.1512	0.06446	2.346	0.01899	0.005772	0.001291	1.038	0.007675	-0.002372	0.006381	Protein-calorie malnutrition	436245	13964	422281	MVP	https://phenomics.va.ornl.gov/web/cipher/pheweb	https://www.science.org/doi/10.1126/science.adj1718	MVP_R4.1000G_AGR.Phe_260.EUR.GIA.dbGaP.txt.gz_ldsc	1741323351668EUR_vtg.txt.gz
0.2275	0.09719	2.34	0.01927	0.004596	0.001538	1.02	0.007594	-0.006102	0.005482	Takes medication for osteoporosis?	315668	7696	307972	MVP	https://phenomics.va.ornl.gov/web/cipher/pheweb	https://www.science.org/doi/10.1126/science.adj2885	MVP_R4.1000G_AGR.SkMsOPMed.EUR.GIA.dbGaP.txt.gz_ldsc	1741323351668EUR_vtg.txt.gz
0.1147	0.04911	2.336	0.01949	0.01342	0.001658	1.102	0.009078	-0.00221	0.005884	Iron deficiency anemias, unspecified or notdue to blood loss	432601	31897	400704	MVP	https://phenomics.va.ornl.gov/web/cipher/pheweb	https://www.science.org/doi/10.1126/science.adj1779	MVP_R4.1000G_AGR.Phe_280_1.EUR.GIA.dbGaP.txt.gz_ldsc	1741323351668EUR_vtg.txt.gz
0.3486	0.1493	2.336	0.01951	0.001783	0.001005	1.021	0.007907	-0.01777	0.005575	Diffuse diseases of connective	448334	2061	446273	MVP (EUR)	https://ftp.ncbi.nlm.nih.gov/dbgap/studies/phs002453/analyses/GIA/	Phe_709. PheCodes_Dermatological System	MVP_R4.1000G_AGR.Phe_709.EUR.GIA.dbGaP.txt.gz.ctg	1741323351668EUR_vtg.txt.gz
0.08849	0.0379	2.335	0.01955	0.05737	0.002985	1.215	0.01109	-0.0007355	0.007194	Acid Reflux/GERD	315668	107942	207726	MVP	https://phenomics.va.ornl.gov/web/cipher/pheweb	https://www.science.org/doi/10.1126/science.adj1337	MVP_R4.1000G_AGR.GIReflux.EUR.GIA.dbGaP.txt.gz_ldsc	1741323351668EUR_vtg.txt.gz
0.3491	0.1496	2.333	0.01963	0.00178	0.001005	1.021	0.007902	-0.01781	0.005575	Diffuse diseases of connective	448334	2061	446273	MVP	https://phenomics.va.ornl.gov/web/cipher/pheweb	https://www.science.org/doi/10.1126/science.adj2595	MVP_R4.1000G_AGR.Phe_709.EUR.GIA.dbGaP.txt.gz_ldsc	1741323351668EUR_vtg.txt.gz
0.09379	0.04025	2.33	0.01979	0.02321	0.002017	1.148	0.01012	0.0005683	0.006448	Other symptoms/disorders or the urinary system	394176	81875	312301	MVP	https://phenomics.va.ornl.gov/web/cipher/pheweb	https://www.science.org/doi/10.1126/science.adj2450	MVP_R4.1000G_AGR.Phe_599.EUR.GIA.dbGaP.txt.gz_ldsc	1741323351668EUR_vtg.txt.gz
0.09269	0.0398	2.329	0.01987	0.02785	0.001856	1.176	0.01076	-0.009734	0.006735	Heart failure with reduced EF [Systolic or combined heart failure]	438433	31220	407213	MVP	https://phenomics.va.ornl.gov/web/cipher/pheweb	https://www.science.org/doi/10.1126/science.adj2129	MVP_R4.1000G_AGR.Phe_428_3.EUR.GIA.dbGaP.txt.gz_ldsc	1741323351668EUR_vtg.txt.gz
0.1705	0.07333	2.325	0.02009	0.005127	0.001176	1.052	0.008404	-0.005017	0.005633	Acidosis	436878	8838	428040	MVP	https://phenomics.va.ornl.gov/web/cipher/pheweb	https://www.science.org/doi/10.1126/science.adj1762	MVP_R4.1000G_AGR.Phe_276_41.EUR.GIA.dbGaP.txt.gz_ldsc	1741323351668EUR_vtg.txt.gz
0.104	0.04485	2.32	0.02035	0.01786	0.001643	1.137	0.009624	-0.003277	0.006324	Syncope and collapse	423912	35325	388587	MVP	https://phenomics.va.ornl.gov/web/cipher/pheweb	https://www.science.org/doi/10.1126/science.adj2736	MVP_R4.1000G_AGR.Phe_788.EUR.GIA.dbGaP.txt.gz_ldsc	1741323351668EUR_vtg.txt.gz
-0.08297	0.03602	-2.303	0.02127	0.03774	0.004449	1.377	0.03716	0.0001764	0.007635	glucose (fasting status unknown, minimum, inv-norm transformed)	419287	NA	NA	MVP	https://phenomics.va.ornl.gov/web/cipher/pheweb	https://www.science.org/doi/10.1126/science.adj1351	MVP_R4.1000G_AGR.Glucose_Min_INT.EUR.GIA.dbGaP.txt.gz_ldsc	1741323351668EUR_vtg.txt.gz
0.1809	0.07856	2.303	0.02129	0.005929	0.001237	1.068	0.008547	-0.009964	0.005971	Disorders of magnesium metabolism	439149	9692	429457	MVP	https://phenomics.va.ornl.gov/web/cipher/pheweb	https://www.science.org/doi/10.1126/science.adj1750	MVP_R4.1000G_AGR.Phe_275_3.EUR.GIA.dbGaP.txt.gz_ldsc	1741323351668EUR_vtg.txt.gz
0.2073	0.09006	2.302	0.02136	0.01395	0.004263	1.016	0.007739	-0.007833	0.005667	Substances taken for anxiety: Drugs or alcohol (more than once)	98990	5402	93588	UK Biobank	https://docs.google.com/spreadsheets/d/1kvPoupSzsSFBNSztMzl04xMoSC3Kcx3CrjVf4yBmESU/edit?ts=5b5f17db#gid=227859291	PHESANT Transformation:20549_0 || CAT-MUL-BINARY-VAR 4 || Indicator name x20425_0_0 || Remove indicator var NAs: 243128 || Remove indicator var <0: 19076 || Removed 0 examples != 4 but with missing value (<0) || sample 93588/5402(98990) ||-Notes:Question asked: Did you ever use the following for the worry or the problems it caused? (tick all that apply): Participant was offered a set of options w…	binary.20549_4.txt	1741323351668EUR_vtg.txt.gz
0.2894	0.1258	2.301	0.02138	0.002175	0.001041	1.011	0.007623	-0.0104	0.005453	Abnormal findings on exam of gastrointestinal tract/abdominal area	434650	5834	428816	MVP	https://phenomics.va.ornl.gov/web/cipher/pheweb	https://www.science.org/doi/10.1126/science.adj2360	MVP_R4.1000G_AGR.Phe_564_8.EUR.GIA.dbGaP.txt.gz_ldsc	1741323351668EUR_vtg.txt.gz
0.1003	0.04361	2.301	0.0214	0.02249	0.001813	1.12	0.009622	-0.007157	0.006823	Hereditary and idiopathic peripheral neuropathy	422954	36894	386060	MVP	https://phenomics.va.ornl.gov/web/cipher/pheweb	https://www.science.org/doi/10.1126/science.adj1940	MVP_R4.1000G_AGR.Phe_356.EUR.GIA.dbGaP.txt.gz_ldsc	1741323351668EUR_vtg.txt.gz
-0.1147	0.04989	-2.298	0.02155	0.01744	0.001669	1.04	0.008239	0.002778	0.006248	Alcohol drinker status: Current	360726	336919	23807	UK Biobank	https://docs.google.com/spreadsheets/d/1kvPoupSzsSFBNSztMzl04xMoSC3Kcx3CrjVf4yBmESU/edit?ts=5b5f17db#gid=227859291	PHESANT Transformation:20117_0 || CAT-SINGLE || CAT-SINGLE-BINARY-VAR: 2 || Inc(>=10): 2(336919) ||-Notes:-Variable type:binary	binary.20117_2.txt	1741323351668EUR_vtg.txt.gz
0.1039	0.04537	2.29	0.02202	0.0263	0.002103	1.146	0.01063	-0.008254	0.007046	Thoracic or lumbosacral neuritis or radiculitis, unspecified	425392	44425	380967	MVP	https://phenomics.va.ornl.gov/web/cipher/pheweb	https://www.science.org/doi/10.1126/science.adj2715	MVP_R4.1000G_AGR.Phe_763.EUR.GIA.dbGaP.txt.gz_ldsc	1741323351668EUR_vtg.txt.gz
0.09505	0.04159	2.285	0.02229	0.1007	0.01299	1.412	0.02828	0.01855	0.009381	neutrophil (absolute count, maximum, inv-norm transformed)	274370	NA	NA	MVP	https://phenomics.va.ornl.gov/web/cipher/pheweb	https://www.science.org/doi/10.1126/science.adj1460	MVP_R4.1000G_AGR.Neut_Abs_Max_INT.EUR.GIA.dbGaP.txt.gz_ldsc	1741323351668EUR_vtg.txt.gz
0.1351	0.05949	2.272	0.0231	0.008069	0.001573	1.047	0.01013	-0.006748	0.005892	Benign neoplasm of eye, uveal	442157	18840	423317	MVP	https://phenomics.va.ornl.gov/web/cipher/pheweb	https://www.science.org/doi/10.1126/science.adj1657	MVP_R4.1000G_AGR.Phe_224_1.EUR.GIA.dbGaP.txt.gz_ldsc	1741323351668EUR_vtg.txt.gz
0.1351	0.05947	2.271	0.02313	0.008068	0.001572	1.047	0.01013	-0.006728	0.005898	Benign neoplasm of eye, uveal	442157	18840	423317	MVP (EUR)	https://ftp.ncbi.nlm.nih.gov/dbgap/studies/phs002453/analyses/GIA/	Phe_224_1. PheCodes_Neoplasms	MVP_R4.1000G_AGR.Phe_224_1.EUR.GIA.dbGaP.txt.gz.ctg	1741323351668EUR_vtg.txt.gz
0.1788	0.079	2.264	0.0236	0.003999	0.001013	1.016	0.007314	-0.002001	0.005123	Intestinal infection	435100	9208	425892	MVP	https://phenomics.va.ornl.gov/web/cipher/pheweb	https://www.science.org/doi/10.1126/science.adj1506	MVP_R4.1000G_AGR.Phe_008.EUR.GIA.dbGaP.txt.gz_ldsc	1741323351668EUR_vtg.txt.gz
0.1765	0.07803	2.262	0.02372	0.004271	0.001228	1.018	0.008174	-0.009056	0.00527	Other acquired deformities of limbs	437384	11588	425796	MVP	https://phenomics.va.ornl.gov/web/cipher/pheweb	https://www.science.org/doi/10.1126/science.adj2664	MVP_R4.1000G_AGR.Phe_736.EUR.GIA.dbGaP.txt.gz_ldsc	1741323351668EUR_vtg.txt.gz
0.1222	0.05404	2.261	0.02373	0.01147	0.001446	1.117	0.009649	-0.00821	0.006187	Persons with potential health hazards related to socioeconomic, psychosocial, and other circumstances	426947	373173	53774	MVP	https://phenomics.va.ornl.gov/web/cipher/pheweb	https://www.science.org/doi/10.1126/science.adj1549	MVP_R4.1000G_AGR.Phe_1010_7.EUR.GIA.dbGaP.txt.gz_ldsc	1741323351668EUR_vtg.txt.gz
0.102	0.04513	2.261	0.02379	0.02148	0.001685	1.115	0.00864	0.003059	0.006521	Acute bronchitis and bronchiolitis	397509	35632	361877	MVP	https://phenomics.va.ornl.gov/web/cipher/pheweb	https://www.science.org/doi/10.1126/science.adj2219	MVP_R4.1000G_AGR.Phe_483.EUR.GIA.dbGaP.txt.gz_ldsc	1741323351668EUR_vtg.txt.gz
0.05433	0.02414	2.251	0.02439	0.2221	0.009541	1.152	0.02537	0.002498	0.008397	Impedance of arm (left)	354807	NA	NA	UK Biobank	https://docs.google.com/spreadsheets/d/1kvPoupSzsSFBNSztMzl04xMoSC3Kcx3CrjVf4yBmESU/edit?ts=5b5f17db#gid=227859291	PHESANT Transformation:23110_0|| CONTINUOUS MAIN || CONTINUOUS || ||-Notes:Body composition estimation by impedance measurement. Impedance of left arm, ohm Measured impedance of left arm. Range 150 - 1200 (ohms) in 1 (ohms) increments.-Variable type:continuous_raw	23110_raw.txt	1741323351668EUR_vtg.txt.gz
0.08996	0.04001	2.249	0.02453	0.125	0.0117	1.157	0.03669	0.01205	0.01037	Neutrophill percentage	349861	NA	NA	UK Biobank	https://docs.google.com/spreadsheets/d/1kvPoupSzsSFBNSztMzl04xMoSC3Kcx3CrjVf4yBmESU/edit?ts=5b5f17db#gid=227859291	PHESANT Transformation:30200_0|| CONTINUOUS MAIN || CONTINUOUS || ||-Notes:Result of Neutrophils Percentage assay, performed on blood sample, obtained from UK Biobank assessment centre visit. Neutrophils (Percentage) is calculated as the proportion of neutrophils in the leukocytes.-Variable type:continuous_raw	30200_raw.txt	1741323351668EUR_vtg.txt.gz
-0.1436	0.06388	-2.249	0.02454	0.003562	0.0006014	1.034	0.009818	-0.001311	0.006126	Acute appendicitis (AcApp) (EUR Biobanks)	1010222	31714	978508	Global Biobank Meta-analysis Initiative Meta-analysis Initiative: powering genetic discovery across human diseases. 2024	https://www.globalbiobankmeta.org/resources	https://www.sciencedirect.com/science/article/pii/S2666979X22001410?via%3Dihub	AcApp_Bothsex_eur_inv_var_meta_GBMI_052021_nbbkgt1.txt.gz.ctgvl	1741323351668EUR_vtg.txt.gz
0.1825	0.08115	2.249	0.02454	0.00505	0.00106	1.026	0.007845	-0.01162	0.006258	Open wounds of head; neck; and trunk	425423	13409	412014	MVP	https://phenomics.va.ornl.gov/web/cipher/pheweb	https://www.science.org/doi/10.1126/science.adj2785	MVP_R4.1000G_AGR.Phe_870.EUR.GIA.dbGaP.txt.gz_ldsc	1741323351668EUR_vtg.txt.gz
0.1359	0.06046	2.247	0.02465	0.006623	0.001125	1.013	0.006758	-0.003264	0.005004	Painful respiration	427018	7899	419119	MVP	https://phenomics.va.ornl.gov/web/cipher/pheweb	https://www.science.org/doi/10.1126/science.adj2250	MVP_R4.1000G_AGR.Phe_512_2.EUR.GIA.dbGaP.txt.gz_ldsc	1741323351668EUR_vtg.txt.gz
0.1467	0.06534	2.245	0.02475	0.006998	0.001471	1.001	0.007336	-0.001672	0.005643	#Spondylopathies	361194	4393	356801	UK Biobank	https://docs.google.com/spreadsheets/d/1kvPoupSzsSFBNSztMzl04xMoSC3Kcx3CrjVf4yBmESU/edit?ts=5b5f17db#gid=227859291	PHESANT Transformation:NA-Notes:NA-Variable type:categorical-Phenotype ID:M13_SPONDYLOPATHY	categorical.M13_SPONDYLOPATHY.txt	1741323351668EUR_vtg.txt.gz
-0.07609	0.0339	-2.244	0.0248	0.1808	0.01702	1.596	0.03519	0.01363	0.009542	lymphocyte (absolute count, mean, inv-norm transformed)	253317	NA	NA	MVP	https://phenomics.va.ornl.gov/web/cipher/pheweb	https://www.science.org/doi/10.1126/science.adj1396	MVP_R4.1000G_AGR.Lymph_Abs_Mean_INT.EUR.GIA.dbGaP.txt.gz_ldsc	1741323351668EUR_vtg.txt.gz
-0.09385	0.04183	-2.243	0.02488	0.04995	0.004576	1.067	0.01574	0.01287	0.007574	Lymphocyte count	349856	NA	NA	UK Biobank	https://docs.google.com/spreadsheets/d/1kvPoupSzsSFBNSztMzl04xMoSC3Kcx3CrjVf4yBmESU/edit?ts=5b5f17db#gid=227859291	PHESANT Transformation:30120_0|| CONTINUOUS MAIN || CONTINUOUS || ||-Notes:Result of Lymphocytes Number assay, performed on blood sample, obtained from UK Biobank assessment centre visit. Lymphocyte count is the proportion of ( lymphoctyes / 100 ) x white blood cell count-Variable type:continuous_raw	30120_raw.txt	1741323351668EUR_vtg.txt.gz
0.0865	0.0386	2.241	0.02504	0.1694	0.03098	1.303	0.08503	0.01769	0.01059	C-reactive protein	400094	400094	NA	UK Biobank (EUR)	https://pan-ukb-us-east-1.s3.amazonaws.com/sumstats_flat_files/biomarkers-30710-both_sexes-irnt.tsv.bgz	EUR: biomarkers : 30710 : Biological samples > Assay results > Blood assays > Blood biochemistry	biomarkers-30710-both_sexes-irnt.tsv.bgz	1741323351668EUR_vtg.txt.gz
0.07521	0.03358	2.24	0.02512	0.05991	0.003005	1.283	0.0134	-0.002357	0.006685	Osteoarthrosis	400167	184084	216083	MVP	https://phenomics.va.ornl.gov/web/cipher/pheweb	https://www.science.org/doi/10.1126/science.adj2673	MVP_R4.1000G_AGR.Phe_740.EUR.GIA.dbGaP.txt.gz_ldsc	1741323351668EUR_vtg.txt.gz
0.0981	0.04382	2.239	0.02519	0.07133	0.008808	1.061	0.01749	-0.0003669	0.006688	Mouth ulcers	461031	47091	413940	UK Biobank	https://data.bris.ac.uk/data/dataset/2j2rqgzedxlq02oqbb4vmycnc2	UK Biobank GWAS on mouth ulcerls	EUR_ulcers.txt.pre_ctgvl.freqs.ctgvl	1741323351668EUR_vtg.txt.gz
0.1382	0.06175	2.238	0.02519	0.005758	0.001236	1.031	0.008193	-0.004298	0.005292	Fracture of ribs	440020	7651	432369	MVP	https://phenomics.va.ornl.gov/web/cipher/pheweb	https://www.science.org/doi/10.1126/science.adj2766	MVP_R4.1000G_AGR.Phe_807.EUR.GIA.dbGaP.txt.gz_ldsc	1741323351668EUR_vtg.txt.gz
0.1082	0.04844	2.233	0.02557	0.01408	0.001743	1.11	0.009076	-0.0008369	0.005871	Iron deficiency anemias	430760	34917	395843	MVP	https://phenomics.va.ornl.gov/web/cipher/pheweb	https://www.science.org/doi/10.1126/science.adj1778	MVP_R4.1000G_AGR.Phe_280.EUR.GIA.dbGaP.txt.gz_ldsc	1741323351668EUR_vtg.txt.gz
0.09517	0.04264	2.232	0.02562	0.02495	0.002695	1.135	0.01371	-0.007841	0.00637	Sebaceous cyst	420570	33269	387301	MVP (EUR)	https://ftp.ncbi.nlm.nih.gov/dbgap/studies/phs002453/analyses/GIA/	Phe_706_2. PheCodes_Dermatological System	MVP_R4.1000G_AGR.Phe_706_2.EUR.GIA.dbGaP.txt.gz.ctg	1741323351668EUR_vtg.txt.gz
0.09527	0.04269	2.231	0.02565	0.02495	0.002694	1.135	0.0137	-0.007851	0.006376	Sebaceous cyst	420570	33269	387301	MVP	https://phenomics.va.ornl.gov/web/cipher/pheweb	https://www.science.org/doi/10.1126/science.adj2589	MVP_R4.1000G_AGR.Phe_706_2.EUR.GIA.dbGaP.txt.gz_ldsc	1741323351668EUR_vtg.txt.gz
-0.06142	0.02753	-2.231	0.02566	0.1429	0.03836	0.9226	0.07724	0.01132	0.00725	Urate	457690	457690	0	CKDGen Consortium (EUR)	https://ckdgen.imbi.uni-freiburg.de/datasets/Tin_2019	https://ckdgen.imbi.uni-freiburg.de/datasets/Tin_2019	1706803906180Urate_GSMR.txt.gz	1741323351668EUR_vtg.txt.gz
0.1448	0.06492	2.23	0.02572	0.008168	0.002288	1.05	0.008644	-0.009396	0.006054	Other specified diseases of sebaceous glands	419938	20908	399030	MVP (EUR)	https://ftp.ncbi.nlm.nih.gov/dbgap/studies/phs002453/analyses/GIA/	Phe_706_8. PheCodes_Dermatological System	MVP_R4.1000G_AGR.Phe_706_8.EUR.GIA.dbGaP.txt.gz.ctg	1741323351668EUR_vtg.txt.gz
0.08214	0.03684	2.23	0.02577	0.05184	0.003102	1.204	0.0132	-0.009743	0.006822	Edema	405466	65194	340272	MVP	https://phenomics.va.ornl.gov/web/cipher/pheweb	https://www.science.org/doi/10.1126/science.adj2733	MVP_R4.1000G_AGR.Phe_782_3.EUR.GIA.dbGaP.txt.gz_ldsc	1741323351668EUR_vtg.txt.gz
0.1448	0.06507	2.226	0.02603	0.008164	0.002294	1.05	0.008654	-0.009391	0.00606	Other specified diseases of sebaceous glands	419938	20908	399030	MVP	https://phenomics.va.ornl.gov/web/cipher/pheweb	https://www.science.org/doi/10.1126/science.adj2590	MVP_R4.1000G_AGR.Phe_706_8.EUR.GIA.dbGaP.txt.gz_ldsc	1741323351668EUR_vtg.txt.gz
0.09225	0.04148	2.224	0.02615	0.01568	0.001948	1.119	0.01117	-0.002976	0.005873	Dermatochalasis	438974	14382	424592	MVP	https://phenomics.va.ornl.gov/web/cipher/pheweb	https://www.science.org/doi/10.1126/science.adj2014	MVP_R4.1000G_AGR.Phe_374_6.EUR.GIA.dbGaP.txt.gz_ldsc	1741323351668EUR_vtg.txt.gz
0.09531	0.04286	2.224	0.02616	0.02258	0.001886	1.049	0.009541	0.01324	0.006701	Diseases of the circulatory system	361194	60504	300690	UK Biobank	https://docs.google.com/spreadsheets/d/1kvPoupSzsSFBNSztMzl04xMoSC3Kcx3CrjVf4yBmESU/edit?ts=5b5f17db#gid=227859291	PHESANT Transformation:NA-Notes:NA-Variable type:categorical-Phenotype ID:IX_CIRCULATORY	categorical.IX_CIRCULATORY.txt	1741323351668EUR_vtg.txt.gz
0.1466	0.06591	2.224	0.02616	0.008783	0.001891	1.121	0.01429	0.002464	0.00669	Vitamin B-complex deficiencies	437580	21840	415740	MVP	https://phenomics.va.ornl.gov/web/cipher/pheweb	https://www.science.org/doi/10.1126/science.adj1724	MVP_R4.1000G_AGR.Phe_261_2.EUR.GIA.dbGaP.txt.gz_ldsc	1741323351668EUR_vtg.txt.gz
0.2336	0.1051	2.221	0.02633	0.03166	0.0114	0.9879	0.00706	-0.01524	0.005935	Number of things worried about during worst period of anxiety	35558	15643	19915	UK Biobank	https://docs.google.com/spreadsheets/d/1kvPoupSzsSFBNSztMzl04xMoSC3Kcx3CrjVf4yBmESU/edit?ts=5b5f17db#gid=227859291	PHESANT Transformation:20543_0|| CAT-SINGLE || Inc(>=10): 1(15643) || Inc(>=10): 2(19915) || CAT-SINGLE-BINARY || sample 15643/19915(35558) ||-Notes:Question asked: Please think of the period in your life when you have felt worried, tense, anxious, or more worried than most people would in your situation. This could be in the past, or it could be continuing now. Did you usually worry about one pa…	binary.20543.txt	1741323351668EUR_vtg.txt.gz
0.1131	0.05115	2.211	0.02707	0.04619	0.004806	0.9996	0.008029	-0.007255	0.005686	Ever highly irritable/argumentative for 2 days	117359	20930	96429	UK Biobank	https://docs.google.com/spreadsheets/d/1kvPoupSzsSFBNSztMzl04xMoSC3Kcx3CrjVf4yBmESU/edit?ts=5b5f17db#gid=227859291	PHESANT Transformation:4653_0|| CAT-SINGLE || Inc(>=10): 0(96429) || Inc(>=10): 1(20930) || CAT-SINGLE-BINARY || sample 96429/20930(117359) ||-Notes:ACE touchscreen question Have you ever had a period of time lasting at least two days when you were so irritable that you found yourself shouting at people or starting fights or arguments?-Variable type:binary	binary.4653.txt	1741323351668EUR_vtg.txt.gz
0.06891	0.0312	2.209	0.0272	0.09622	0.004145	1.105	0.01533	0.01531	0.006943	Qualifications: None of the above	357549	61093	296456	UK Biobank	https://docs.google.com/spreadsheets/d/1kvPoupSzsSFBNSztMzl04xMoSC3Kcx3CrjVf4yBmESU/edit?ts=5b5f17db#gid=227859291	PHESANT Transformation:6138_0 || CAT-MUL-BINARY-VAR 100 || NO_NAN Remove NA participants 510 || Removed 3135 examples != 100 but with missing value (<0) || sample 296456/61093(357549) ||-Notes:ACE touchscreen question Which of the following qualifications do you have? (You can select more than one) The following checks were performed: If code -7 was selected, then no additional choices were allow…	binary.6138_100.txt	1741323351668EUR_vtg.txt.gz
0.2773	0.1255	2.208	0.02721	0.002962	0.001247	1.008	0.007134	-0.008274	0.006539	Treatment/medication code: calcichew d3 tablet	361141	3423	357718	UK Biobank	https://docs.google.com/spreadsheets/d/1kvPoupSzsSFBNSztMzl04xMoSC3Kcx3CrjVf4yBmESU/edit?ts=5b5f17db#gid=227859291	PHESANT Transformation:20003_0 || CAT-MUL-BINARY-VAR 1140871050 || Indicator name x137_0_0 || Remove indicator var NAs: 53 || Remove indicator var <0: 0 || Removed 0 examples != 1140871050 but with missing value (<0) || sample 357718/3423(361141) ||-Notes:Code for treatment Negative codes indicate free-text entry.-Variable type:binary	binary.20003_1140871050.txt	1741323351668EUR_vtg.txt.gz
0.1689	0.07657	2.206	0.02741	0.004393	0.001203	1.025	0.008213	-0.006293	0.006061	Phlebitis and thrombophlebitis	444394	3885	440509	MVP	https://phenomics.va.ornl.gov/web/cipher/pheweb	https://www.science.org/doi/10.1126/science.adj2172	MVP_R4.1000G_AGR.Phe_451.EUR.GIA.dbGaP.txt.gz_ldsc	1741323351668EUR_vtg.txt.gz
0.4351	0.1973	2.205	0.02744	0.001525	0.00107	1.012	0.007104	-0.001193	0.005204	Other disorders of soft tissues	433071	6255	426816	MVP	https://phenomics.va.ornl.gov/web/cipher/pheweb	https://www.science.org/doi/10.1126/science.adj2648	MVP_R4.1000G_AGR.Phe_729.EUR.GIA.dbGaP.txt.gz_ldsc	1741323351668EUR_vtg.txt.gz
0.1663	0.07555	2.201	0.02772	0.004337	0.001081	1.02	0.007302	-0.006382	0.005412	Allergies, other	430786	11331	419455	MVP	https://phenomics.va.ornl.gov/web/cipher/pheweb	https://www.science.org/doi/10.1126/science.adj2810	MVP_R4.1000G_AGR.Phe_949.EUR.GIA.dbGaP.txt.gz_ldsc	1741323351668EUR_vtg.txt.gz
0.09944	0.04527	2.196	0.02806	0.01998	0.002007	1.03	0.009159	0.0005559	0.006134	Medication for pain relief, constipation, heartburn: Aspirin	357084	50204	306880	UK Biobank	https://docs.google.com/spreadsheets/d/1kvPoupSzsSFBNSztMzl04xMoSC3Kcx3CrjVf4yBmESU/edit?ts=5b5f17db#gid=227859291	PHESANT Transformation:6154_0 || CAT-MUL-BINARY-VAR 1 || NO_NAN Remove NA participants 514 || Removed 3596 examples != 1 but with missing value (<0) || sample 306880/50204(357084) ||-Notes:ACE touchscreen question Do you regularly take any of the following? (You can select more than one answer) The following checks were performed: If code -7 was selected, then no additional choices were allowed. …	binary.6154_1.txt	1741323351668EUR_vtg.txt.gz
0.08016	0.0365	2.196	0.02806	0.04223	0.003265	1.156	0.01217	-0.007799	0.006592	Dermatophytosis / Dermatomycosis	400018	97617	302401	MVP	https://phenomics.va.ornl.gov/web/cipher/pheweb	https://www.science.org/doi/10.1126/science.adj1558	MVP_R4.1000G_AGR.Phe_110.EUR.GIA.dbGaP.txt.gz_ldsc	1741323351668EUR_vtg.txt.gz
0.09759	0.04452	2.192	0.02837	0.04188	0.002654	1.042	0.01044	0.01439	0.007412	Taking other prescription medications	360027	168993	191034	UK Biobank	https://docs.google.com/spreadsheets/d/1kvPoupSzsSFBNSztMzl04xMoSC3Kcx3CrjVf4yBmESU/edit?ts=5b5f17db#gid=227859291	PHESANT Transformation:2492_0|| CAT-SINGLE || Inc(>=10): 1(168993) || Inc(>=10): 0(191034) || CAT-SINGLE-BINARY || sample 191034/168993(360027) ||-Notes:ACE touchscreen question Do you regularly take any other PRESCRIPTION medications? (Do not forget medications such as puffers or patches)-Variable type:binary	binary.2492.txt	1741323351668EUR_vtg.txt.gz
0.1614	0.07383	2.186	0.02881	0.00901	0.002218	1.038	0.009859	-0.007534	0.006	Takes medication for blood clot/ pulmonary embolism/ deep vein thrombosis (DVT)?	315668	7956	307712	MVP	https://phenomics.va.ornl.gov/web/cipher/pheweb	https://www.science.org/doi/10.1126/science.adj1238	MVP_R4.1000G_AGR.CircClotMed.EUR.GIA.dbGaP.txt.gz_ldsc	1741323351668EUR_vtg.txt.gz
-0.09784	0.04479	-2.184	0.02893	0.01909	0.001819	1.054	0.008364	0.004136	0.005871	Nitrogen dioxide air pollution; 2006	356078	NA	NA	UK Biobank	https://docs.google.com/spreadsheets/d/1kvPoupSzsSFBNSztMzl04xMoSC3Kcx3CrjVf4yBmESU/edit?ts=5b5f17db#gid=227859291	PHESANT Transformation:24017_0|| CONTINUOUS MAIN || CONTINUOUS || ||-Notes:Nitrogen dioxide; Land Use Regression (LUR) estimate for annual average 2006.-Variable type:continuous_raw	24017_raw.txt	1741323351668EUR_vtg.txt.gz
-0.05525	0.02531	-2.182	0.02907	0.1115	0.00543	1.11	0.01716	-0.003026	0.007246	Hand grip strength (right)	359729	NA	NA	UK Biobank	https://docs.google.com/spreadsheets/d/1kvPoupSzsSFBNSztMzl04xMoSC3Kcx3CrjVf4yBmESU/edit?ts=5b5f17db#gid=227859291	PHESANT Transformation:47_0|| INTEGER || CONTINUOUS || ||-Notes:Right grip strength-Variable type:continuous_raw	47_raw.txt	1741323351668EUR_vtg.txt.gz
-0.08204	0.03759	-2.182	0.02909	0.1825	0.01661	0.9845	0.02194	0.008635	0.008144	Lymphocyte count	173495	NA	NA	UK Biobank and INTERVAL	http://www.bloodcellgenetics.org/	Aggregate count of lymphoid cells per unit volume of blood	lymph_N171643_narrow_form.txt.common	1741323351668EUR_vtg.txt.gz
0.1036	0.0475	2.181	0.02917	0.0174	0.001812	1.111	0.01	-0.004305	0.006416	Cardiomyopathy	439014	20680	418334	MVP	https://phenomics.va.ornl.gov/web/cipher/pheweb	https://www.science.org/doi/10.1126/science.adj2089	MVP_R4.1000G_AGR.Phe_425.EUR.GIA.dbGaP.txt.gz_ldsc	1741323351668EUR_vtg.txt.gz
0.1207	0.05542	2.179	0.02934	0.009629	0.001271	1.081	0.007606	-0.01016	0.005609	Open wounds of extremities	415158	26753	388405	MVP	https://phenomics.va.ornl.gov/web/cipher/pheweb	https://www.science.org/doi/10.1126/science.adj2788	MVP_R4.1000G_AGR.Phe_871.EUR.GIA.dbGaP.txt.gz_ldsc	1741323351668EUR_vtg.txt.gz
0.09079	0.04171	2.177	0.0295	0.01674	0.001475	1.073	0.007974	-0.0002858	0.00554	Ingrowing nail	434365	26179	408186	MVP (EUR)	https://ftp.ncbi.nlm.nih.gov/dbgap/studies/phs002453/analyses/GIA/	Phe_703_1. PheCodes_Dermatological System	MVP_R4.1000G_AGR.Phe_703_1.EUR.GIA.dbGaP.txt.gz.ctg	1741323351668EUR_vtg.txt.gz
0.09074	0.0417	2.176	0.02955	0.01675	0.001474	1.073	0.007962	-0.0002792	0.00553	Ingrowing nail	434365	26179	408186	MVP	https://phenomics.va.ornl.gov/web/cipher/pheweb	https://www.science.org/doi/10.1126/science.adj2577	MVP_R4.1000G_AGR.Phe_703_1.EUR.GIA.dbGaP.txt.gz_ldsc	1741323351668EUR_vtg.txt.gz
0.07946	0.03655	2.174	0.0297	0.04099	0.003301	1.164	0.01214	-0.007356	0.00653	Dermatophytosis	401217	95136	306081	MVP	https://phenomics.va.ornl.gov/web/cipher/pheweb	https://www.science.org/doi/10.1126/science.adj1559	MVP_R4.1000G_AGR.Phe_110_1.EUR.GIA.dbGaP.txt.gz_ldsc	1741323351668EUR_vtg.txt.gz
0.2253	0.1039	2.168	0.03015	0.002619	0.0009271	1.012	0.007022	-0.01246	0.006001	Cancer of mouth	448696	4538	444158	MVP (EUR)	https://ftp.ncbi.nlm.nih.gov/dbgap/studies/phs002453/analyses/GIA/	Phe_145. PheCodes_Neoplasms	MVP_R4.1000G_AGR.Phe_145.EUR.GIA.dbGaP.txt.gz.ctg	1741323351668EUR_vtg.txt.gz
0.08286	0.03826	2.166	0.03032	0.1331	0.02143	1.089	0.06839	0.01198	0.00965	Granulocyte percentage of myeloid white cells	173485	NA	NA	UK Biobank and INTERVAL	http://www.bloodcellgenetics.org/	Percentage of myeloid white cells that are granulocytes	gran_p_myeloid_wbc_N169545_narrow_form.txt.common	1741323351668EUR_vtg.txt.gz
0.1284	0.05929	2.165	0.03035	0.01255	0.001394	1.044	0.007444	0.005613	0.006392	Treatment/medication code: omeprazole	361141	21119	340022	UK Biobank	https://docs.google.com/spreadsheets/d/1kvPoupSzsSFBNSztMzl04xMoSC3Kcx3CrjVf4yBmESU/edit?ts=5b5f17db#gid=227859291	PHESANT Transformation:20003_0 || CAT-MUL-BINARY-VAR 1140865634 || Indicator name x137_0_0 || Remove indicator var NAs: 53 || Remove indicator var <0: 0 || Removed 0 examples != 1140865634 but with missing value (<0) || sample 340022/21119(361141) ||-Notes:Code for treatment Negative codes indicate free-text entry.-Variable type:binary	binary.20003_1140865634.txt	1741323351668EUR_vtg.txt.gz
0.2251	0.104	2.163	0.03051	0.002616	0.0009265	1.012	0.007026	-0.01244	0.006008	Cancer of mouth	448696	4538	444158	MVP	https://phenomics.va.ornl.gov/web/cipher/pheweb	https://www.science.org/doi/10.1126/science.adj1570	MVP_R4.1000G_AGR.Phe_145.EUR.GIA.dbGaP.txt.gz_ldsc	1741323351668EUR_vtg.txt.gz
0.2489	0.1151	2.161	0.03066	0.003068	0.001306	1.02	0.007992	-0.009168	0.006799	Diagnoses - main ICD10: K63 Other diseases of intestine	361194	8041	353153	UK Biobank	https://docs.google.com/spreadsheets/d/1kvPoupSzsSFBNSztMzl04xMoSC3Kcx3CrjVf4yBmESU/edit?ts=5b5f17db#gid=227859291	PHESANT Transformation:NA-Notes:NA-Variable type:categorical-Phenotype ID:K63	categorical.K63.txt	1741323351668EUR_vtg.txt.gz
0.1663	0.07699	2.16	0.03078	0.005356	0.001221	0.9869	0.006815	-0.003393	0.006374	Malignant neoplasm of bronchus and lung	361194	1681	359513	UK Biobank	https://docs.google.com/spreadsheets/d/1kvPoupSzsSFBNSztMzl04xMoSC3Kcx3CrjVf4yBmESU/edit?ts=5b5f17db#gid=227859291	PHESANT Transformation:NA-Notes:NA-Variable type:categorical-Phenotype ID:C_BRONCHUS_LUNG	categorical.C_BRONCHUS_LUNG.txt	1741323351668EUR_vtg.txt.gz
0.1663	0.07699	2.16	0.03078	0.005356	0.001221	0.9869	0.006815	-0.003393	0.006374	Malignant neoplasm of bronchus and lung	361194	1681	359513	UK Biobank	https://docs.google.com/spreadsheets/d/1kvPoupSzsSFBNSztMzl04xMoSC3Kcx3CrjVf4yBmESU/edit?ts=5b5f17db#gid=227859291	PHESANT Transformation:NA-Notes:NA-Variable type:categorical-Phenotype ID:C3_BRONCHUS_LUNG	categorical.C3_BRONCHUS_LUNG.txt	1741323351668EUR_vtg.txt.gz
-0.08406	0.03893	-2.159	0.03084	0.02026	0.002905	1.022	0.01081	0.01148	0.004445	Leucine	95372	NA	NA	UKB (EUR)	https://www.nature.com/articles/s41467-024-52310-9	GCST90445904. NMR	GCST90445904.tsv.common.ctg	1741323351668EUR_vtg.txt.gz
0.2541	0.1177	2.158	0.0309	0.003108	0.001399	1.004	0.00812	-0.00404	0.00544	Other/unspecified dorsalgia	361194	2118	359076	UK Biobank	https://docs.google.com/spreadsheets/d/1kvPoupSzsSFBNSztMzl04xMoSC3Kcx3CrjVf4yBmESU/edit?ts=5b5f17db#gid=227859291	PHESANT Transformation:NA-Notes:NA-Variable type:categorical-Phenotype ID:M13_DORSALGIANAS	categorical.M13_DORSALGIANAS.txt	1741323351668EUR_vtg.txt.gz
0.1142	0.05295	2.157	0.03099	0.01509	0.001517	1.079	0.009137	-0.003699	0.006404	Enthesopathy	406824	44032	362792	MVP	https://phenomics.va.ornl.gov/web/cipher/pheweb	https://www.science.org/doi/10.1126/science.adj2635	MVP_R4.1000G_AGR.Phe_726_1.EUR.GIA.dbGaP.txt.gz_ldsc	1741323351668EUR_vtg.txt.gz
0.1695	0.07862	2.156	0.03105	0.09148	0.01917	1.007	0.007469	-0.004316	0.005504	Former alcohol drinker	23745	12564	11181	UK Biobank	https://docs.google.com/spreadsheets/d/1kvPoupSzsSFBNSztMzl04xMoSC3Kcx3CrjVf4yBmESU/edit?ts=5b5f17db#gid=227859291	PHESANT Transformation:3731_0|| CAT-SINGLE || Inc(>=10): 1(12564) || Inc(>=10): 0(11181) || CAT-SINGLE-BINARY || sample 11181/12564(23745) ||-Notes:ACE touchscreen question Did you previously drink alcohol? ~F3731~ was collected from participants who indicated they never drink alcohol, as defined by their answers to ~F1558~-Variable type:binary	binary.3731.txt	1741323351668EUR_vtg.txt.gz
0.1051	0.04874	2.155	0.03113	0.01638	0.001753	1.107	0.009483	-0.003947	0.006369	Primary/intrinsic cardiomyopathies	439612	19708	419904	MVP	https://phenomics.va.ornl.gov/web/cipher/pheweb	https://www.science.org/doi/10.1126/science.adj2090	MVP_R4.1000G_AGR.Phe_425_1.EUR.GIA.dbGaP.txt.gz_ldsc	1741323351668EUR_vtg.txt.gz
0.1574	0.0731	2.154	0.03127	0.02296	0.00474	1.019	0.007195	0.001974	0.006529	Breathing problems during period of job: Yes	91149	6697	84452	UK Biobank	https://docs.google.com/spreadsheets/d/1kvPoupSzsSFBNSztMzl04xMoSC3Kcx3CrjVf4yBmESU/edit?ts=5b5f17db#gid=227859291	PHESANT Transformation:22616_0 || CAT-MUL-BINARY-VAR 1 || NO_NAN Remove NA participants 270045 || Removed 0 examples != 1 but with missing value (<0) || sample 84452/6697(91149) ||-Notes:Particpant asked: When you had this job, did you have problems with your breathing?-Variable type:binary	binary.22616_1.txt	1741323351668EUR_vtg.txt.gz
0.07208	0.03349	2.152	0.03138	0.03934	0.002552	1.223	0.01222	-0.006792	0.007329	Hypermetropia	394687	73817	320870	MVP	https://phenomics.va.ornl.gov/web/cipher/pheweb	https://www.science.org/doi/10.1126/science.adj1987	MVP_R4.1000G_AGR.Phe_367_8.EUR.GIA.dbGaP.txt.gz_ldsc	1741323351668EUR_vtg.txt.gz
0.1276	0.0593	2.152	0.03143	0.008197	0.001552	1.046	0.009865	-0.006845	0.00583	Benign neoplasm of eye	441030	19748	421282	MVP	https://phenomics.va.ornl.gov/web/cipher/pheweb	https://www.science.org/doi/10.1126/science.adj1656	MVP_R4.1000G_AGR.Phe_224.EUR.GIA.dbGaP.txt.gz_ldsc	1741323351668EUR_vtg.txt.gz
0.1275	0.05927	2.151	0.03147	0.008196	0.001552	1.046	0.009862	-0.006825	0.005833	Benign neoplasm of eye	441030	19748	421282	MVP (EUR)	https://ftp.ncbi.nlm.nih.gov/dbgap/studies/phs002453/analyses/GIA/	Phe_224. PheCodes_Neoplasms	MVP_R4.1000G_AGR.Phe_224.EUR.GIA.dbGaP.txt.gz.ctg	1741323351668EUR_vtg.txt.gz
0.08471	0.03938	2.151	0.03149	0.05112	0.003367	1.023	0.01186	0.002234	0.006976	Tense / 'highly strung'	350159	60513	289646	UK Biobank	https://docs.google.com/spreadsheets/d/1kvPoupSzsSFBNSztMzl04xMoSC3Kcx3CrjVf4yBmESU/edit?ts=5b5f17db#gid=227859291	PHESANT Transformation:1990_0|| CAT-SINGLE || Inc(>=10): 0(289646) || Inc(>=10): 1(60513) || CAT-SINGLE-BINARY || sample 289646/60513(350159) ||-Notes:ACE touchscreen question Would you call yourself tense or 'highly strung'? If the participant activated the Help button they were shown the message: Work through these questions quickly and do not think about the exact meaning of the question-Varia…	binary.1990.txt	1741323351668EUR_vtg.txt.gz
0.1784	0.0831	2.147	0.03177	0.005062	0.00123	1.004	0.007421	-0.003733	0.006118	Mineral and other dietary supplements: Iron	360016	10695	349321	UK Biobank	https://docs.google.com/spreadsheets/d/1kvPoupSzsSFBNSztMzl04xMoSC3Kcx3CrjVf4yBmESU/edit?ts=5b5f17db#gid=227859291	PHESANT Transformation:6179_0 || CAT-MUL-BINARY-VAR 5 || NO_NAN Remove NA participants 514 || Removed 664 examples != 5 but with missing value (<0) || sample 349321/10695(360016) ||-Notes:ACE touchscreen question Do you regularly take any of the following? (You can select more than one answer) The following checks were performed: If code -7 was selected, then no additional choices were allowed. I…	binary.6179_5.txt	1741323351668EUR_vtg.txt.gz
0.1624	0.07571	2.146	0.0319	0.005536	0.001393	0.997	0.007647	-0.005524	0.005288	Vitamin and mineral supplements: Vitamin D	359245	13687	345558	UK Biobank	https://docs.google.com/spreadsheets/d/1kvPoupSzsSFBNSztMzl04xMoSC3Kcx3CrjVf4yBmESU/edit?ts=5b5f17db#gid=227859291	PHESANT Transformation:6155_0 || CAT-MUL-BINARY-VAR 4 || NO_NAN Remove NA participants 514 || Removed 1435 examples != 4 but with missing value (<0) || sample 345558/13687(359245) ||-Notes:ACE touchscreen question Do you regularly take any of the following? (You can select more than one answer) The following checks were performed: If code -7 was selected, then no additional choices were allowed. …	binary.6155_4.txt	1741323351668EUR_vtg.txt.gz
-0.08026	0.03741	-2.145	0.03192	0.04208	0.002588	1.035	0.01129	-0.006774	0.006974	Never eat eggs, dairy, wheat, sugar: I eat all of the above	359777	278162	81615	UK Biobank	https://docs.google.com/spreadsheets/d/1kvPoupSzsSFBNSztMzl04xMoSC3Kcx3CrjVf4yBmESU/edit?ts=5b5f17db#gid=227859291	PHESANT Transformation:6144_0 || CAT-MUL-BINARY-VAR 5 || NO_NAN Remove NA participants 1417 || Removed 0 examples != 5 but with missing value (<0) || sample 81615/278162(359777) ||-Notes:ACE touchscreen question Which of the following do you NEVER eat? (You can select more than one answer) The following checks were performed: If code 5 was selected, then no additional choices were allowed. If cod…	binary.6144_5.txt	1741323351668EUR_vtg.txt.gz
0.1792	0.08353	2.145	0.03196	0.0042	0.001286	0.9998	0.007308	-0.01163	0.005687	Non-cancer illness code, self-reported: chronic obstructive airways disease/copd	361141	1285	359856	UK Biobank	https://docs.google.com/spreadsheets/d/1kvPoupSzsSFBNSztMzl04xMoSC3Kcx3CrjVf4yBmESU/edit?ts=5b5f17db#gid=227859291	PHESANT Transformation:20002_0 || CAT-MUL-BINARY-VAR 1112 || Indicator name x135_0_0 || Remove indicator var NAs: 53 || Remove indicator var <0: 0 || Removed 0 examples != 1112 but with missing value (<0) || sample 359856/1285(361141) ||-Notes:Code for non-cancer illness. If the participant was uncertain of the type of illness they had had, then they described it to the interviewer (a trained nur…	binary.20002_1112.txt	1741323351668EUR_vtg.txt.gz
0.1838	0.0857	2.144	0.03202	0.004093	0.001317	1.047	0.01161	-0.004462	0.006201	Lymphoid leukemia	450698	3177	447521	MVP	https://phenomics.va.ornl.gov/web/cipher/pheweb	https://www.science.org/doi/10.1126/science.adj1635	MVP_R4.1000G_AGR.Phe_204_1.EUR.GIA.dbGaP.txt.gz_ldsc	1741323351668EUR_vtg.txt.gz
0.09948	0.04642	2.143	0.03209	0.01421	0.001447	1.087	0.008942	0.0009108	0.00578	Cardiac pacemaker/device in situ	445548	24587	420961	MVP	https://phenomics.va.ornl.gov/web/cipher/pheweb	https://www.science.org/doi/10.1126/science.adj2106	MVP_R4.1000G_AGR.Phe_426_9.EUR.GIA.dbGaP.txt.gz_ldsc	1741323351668EUR_vtg.txt.gz
0.1837	0.08574	2.142	0.0322	0.004088	0.001318	1.047	0.01163	-0.004436	0.006195	Lymphoid leukemia	450698	3177	447521	MVP (EUR)	https://ftp.ncbi.nlm.nih.gov/dbgap/studies/phs002453/analyses/GIA/	Phe_204_1. PheCodes_Neoplasms	MVP_R4.1000G_AGR.Phe_204_1.EUR.GIA.dbGaP.txt.gz.ctg	1741323351668EUR_vtg.txt.gz
0.05732	0.02679	2.14	0.03237	0.2306	0.01084	1.153	0.02736	-0.006027	0.009486	Impedance of leg (right)	354817	NA	NA	UK Biobank	https://docs.google.com/spreadsheets/d/1kvPoupSzsSFBNSztMzl04xMoSC3Kcx3CrjVf4yBmESU/edit?ts=5b5f17db#gid=227859291	PHESANT Transformation:23107_0|| CONTINUOUS MAIN || CONTINUOUS || ||-Notes:Body composition estimation by impedance measurement. Impedance of right leg, oh Measured impedance of right leg. Range 150 - 1200 (ohms) in 1 (ohms) increments.-Variable type:continuous_raw	23107_raw.txt	1741323351668EUR_vtg.txt.gz
-0.07626	0.03567	-2.138	0.03252	0.1366	0.01234	1.508	0.02802	-0.009977	0.009404	lymphocyte (fraction, maximum, inv-norm transformed)	290958	NA	NA	MVP	https://phenomics.va.ornl.gov/web/cipher/pheweb	https://www.science.org/doi/10.1126/science.adj1398	MVP_R4.1000G_AGR.Lymph_Fra_Max_INT.EUR.GIA.dbGaP.txt.gz_ldsc	1741323351668EUR_vtg.txt.gz
0.2214	0.1036	2.138	0.03255	0.003233	0.001327	1.015	0.009062	-0.01256	0.00611	Polycythemia vera	450041	2102	447939	MVP (EUR)	https://ftp.ncbi.nlm.nih.gov/dbgap/studies/phs002453/analyses/GIA/	Phe_200_1. PheCodes_Neoplasms	MVP_R4.1000G_AGR.Phe_200_1.EUR.GIA.dbGaP.txt.gz.ctg	1741323351668EUR_vtg.txt.gz
0.1489	0.06972	2.136	0.03269	0.005514	0.00127	1.043	0.008519	-0.008089	0.005478	Diseases of the larynx and vocal cords	438298	18793	419505	MVP	https://phenomics.va.ornl.gov/web/cipher/pheweb	https://www.science.org/doi/10.1126/science.adj2199	MVP_R4.1000G_AGR.Phe_473.EUR.GIA.dbGaP.txt.gz_ldsc	1741323351668EUR_vtg.txt.gz
0.2212	0.1036	2.135	0.03277	0.003232	0.001328	1.015	0.009073	-0.01252	0.006113	Polycythemia vera	450041	2102	447939	MVP	https://phenomics.va.ornl.gov/web/cipher/pheweb	https://www.science.org/doi/10.1126/science.adj1630	MVP_R4.1000G_AGR.Phe_200_1.EUR.GIA.dbGaP.txt.gz_ldsc	1741323351668EUR_vtg.txt.gz
-0.08962	0.04202	-2.133	0.03292	0.1278	0.008224	1.065	0.009928	-0.006177	0.006609	Year ended full time education	91777	NA	NA	UK Biobank	https://docs.google.com/spreadsheets/d/1kvPoupSzsSFBNSztMzl04xMoSC3Kcx3CrjVf4yBmESU/edit?ts=5b5f17db#gid=227859291	PHESANT Transformation:22501_0|| INTEGER || reassignments: -1=NA|-2=NA|-3=NA || CONTINUOUS || ||-Notes:Year ended full time education-Variable type:continuous_raw	22501_raw.txt	1741323351668EUR_vtg.txt.gz
0.2116	0.09925	2.131	0.03305	0.003256	0.001278	0.9948	0.006748	-0.01104	0.005674	Treatment/medication code: gabapentin	361141	1674	359467	UK Biobank	https://docs.google.com/spreadsheets/d/1kvPoupSzsSFBNSztMzl04xMoSC3Kcx3CrjVf4yBmESU/edit?ts=5b5f17db#gid=227859291	PHESANT Transformation:20003_0 || CAT-MUL-BINARY-VAR 1140872228 || Indicator name x137_0_0 || Remove indicator var NAs: 53 || Remove indicator var <0: 0 || Removed 0 examples != 1140872228 but with missing value (<0) || sample 359467/1674(361141) ||-Notes:Code for treatment Negative codes indicate free-text entry.-Variable type:binary	binary.20003_1140872228.txt	1741323351668EUR_vtg.txt.gz
0.2336	0.1097	2.13	0.03314	0.00292	0.001431	0.9931	0.008396	-0.005804	0.005494	Diagnoses - main ICD10: J47 Bronchiectasis	361194	393	360801	UK Biobank	https://docs.google.com/spreadsheets/d/1kvPoupSzsSFBNSztMzl04xMoSC3Kcx3CrjVf4yBmESU/edit?ts=5b5f17db#gid=227859291	PHESANT Transformation:NA-Notes:NA-Variable type:categorical-Phenotype ID:J47	categorical.J47.txt	1741323351668EUR_vtg.txt.gz
-0.06619	0.03114	-2.126	0.03352	0.1158	0.00542	1.094	0.01655	-0.0008565	0.007683	Age first had sexual intercourse	317694	NA	NA	UK Biobank	https://docs.google.com/spreadsheets/d/1kvPoupSzsSFBNSztMzl04xMoSC3Kcx3CrjVf4yBmESU/edit?ts=5b5f17db#gid=227859291	PHESANT Transformation:2139_0|| INTEGER || reassignments: -1=NA|-2=NA|-3=NA || CONTINUOUS || ||-Notes:ACE touchscreen question What was your age when you first had sexual intercourse? (Sexual intercourse includes vaginal, oral or anal intercourse) The following checks were performed: If answer If answer > Participants age then rejected If answer If the participant activated the Help button they w…	2139_raw.txt	1741323351668EUR_vtg.txt.gz
0.07304	0.03437	2.125	0.03357	0.04253	0.002572	1.032	0.00981	-0.01041	0.00651	Bread intake	353030	NA	NA	UK Biobank	https://docs.google.com/spreadsheets/d/1kvPoupSzsSFBNSztMzl04xMoSC3Kcx3CrjVf4yBmESU/edit?ts=5b5f17db#gid=227859291	PHESANT Transformation:1438_0|| INTEGER || reassignments: -1=NA|-3=NA|-10=NA || CONTINUOUS || ||-Notes:ACE touchscreen question How many slices of bread do you eat each WEEK? The following checks were performed: If answer If answer > 250 then rejected If answer > 50 then participant asked to confirm If the participant activated the Help button they were shown the message: For other types of bread…	1438_raw.txt	1741323351668EUR_vtg.txt.gz
0.1034	0.04871	2.122	0.03381	0.01843	0.006635	1.075	0.01731	-0.01017	0.006937	Vitamin D deficiency	414619	73425	341194	MVP	https://phenomics.va.ornl.gov/web/cipher/pheweb	https://www.science.org/doi/10.1126/science.adj1725	MVP_R4.1000G_AGR.Phe_261_4.EUR.GIA.dbGaP.txt.gz_ldsc	1741323351668EUR_vtg.txt.gz
0.07385	0.03485	2.119	0.03409	0.01192	0.0008376	1.054	0.01135	0.004959	0.006373	COPD (All Biobanks)	1392366	81568	1310798	Global Biobank Meta-analysis Initiative Meta-analysis Initiative: powering genetic discovery across human diseases. 2030	https://www.globalbiobankmeta.org/resources	https://www.sciencedirect.com/science/article/pii/S2666979X22001410?via%3Dihub	COPD_Bothsex_inv_var_meta_GBMI_052021_nbbkgt1.txt.gz.ctgvl	1741323351668EUR_vtg.txt.gz
0.1603	0.07601	2.109	0.03493	0.004905	0.001133	1.045	0.007497	-0.001702	0.006245	Other abnormality of urination	425520	15646	409874	MVP	https://phenomics.va.ornl.gov/web/cipher/pheweb	https://www.science.org/doi/10.1126/science.adj2457	MVP_R4.1000G_AGR.Phe_599_9.EUR.GIA.dbGaP.txt.gz_ldsc	1741323351668EUR_vtg.txt.gz
0.2277	0.108	2.109	0.03495	0.002747	0.001124	1.019	0.007262	-0.003602	0.005513	Sprains and strains of back and neck	431936	9479	422457	MVP	https://phenomics.va.ornl.gov/web/cipher/pheweb	https://www.science.org/doi/10.1126/science.adj2777	MVP_R4.1000G_AGR.Phe_841.EUR.GIA.dbGaP.txt.gz_ldsc	1741323351668EUR_vtg.txt.gz
0.147	0.06969	2.109	0.03496	0.02506	0.004686	1.014	0.006751	0.002895	0.006434	Breathing problems responsible for leaving job: No	91149	5412	85737	UK Biobank	https://docs.google.com/spreadsheets/d/1kvPoupSzsSFBNSztMzl04xMoSC3Kcx3CrjVf4yBmESU/edit?ts=5b5f17db#gid=227859291	PHESANT Transformation:22619_0 || CAT-MUL-BINARY-VAR 0 || Indicator name x22616_0_0 || Remove indicator var NAs: 270045 || Remove indicator var <0: 0 || Removed 0 examples != 0 but with missing value (<0) || sample 85737/5412(91149) ||-Notes:Participants who indicated they had breathing problems during a job were asked: Did you leave this job because of breathing problems? Question only asked if …	binary.22619_0.txt	1741323351668EUR_vtg.txt.gz
0.1037	0.0492	2.109	0.03497	0.0111	0.00127	1.12	0.008792	-0.004923	0.006017	Hematuria	425075	39920	385155	MVP	https://phenomics.va.ornl.gov/web/cipher/pheweb	https://www.science.org/doi/10.1126/science.adj2435	MVP_R4.1000G_AGR.Phe_593.EUR.GIA.dbGaP.txt.gz_ldsc	1741323351668EUR_vtg.txt.gz
-0.2004	0.09506	-2.108	0.035	0.03015	0.009331	1.014	0.007749	0.009812	0.006232	Target heart rate achieved	53998	5554	48444	UK Biobank	https://docs.google.com/spreadsheets/d/1kvPoupSzsSFBNSztMzl04xMoSC3Kcx3CrjVf4yBmESU/edit?ts=5b5f17db#gid=227859291	PHESANT Transformation:6034_0|| CAT-SINGLE || Inc(>=10): 0(48444) || Inc(>=10): 1(5554) || CAT-SINGLE-BINARY || sample 48444/5554(53998) ||-Notes:This field specifies whether the target heart rate was achieved during the fitness test. Target HR formula used for biobank participants is = (220 - age ) * 0.75.-Variable type:binary	binary.6034.txt	1741323351668EUR_vtg.txt.gz
0.1025	0.04864	2.106	0.03518	0.01863	0.001692	1.033	0.008153	-0.004587	0.006331	Mouth/teeth dental problems: Bleeding gums	359841	46694	313147	UK Biobank	https://docs.google.com/spreadsheets/d/1kvPoupSzsSFBNSztMzl04xMoSC3Kcx3CrjVf4yBmESU/edit?ts=5b5f17db#gid=227859291	PHESANT Transformation:6149_0 || CAT-MUL-BINARY-VAR 3 || NO_NAN Remove NA participants 512 || Removed 841 examples != 3 but with missing value (<0) || sample 313147/46694(359841) ||-Notes:ACE touchscreen question Do you have any of the following? (You can select more than one answer) The following checks were performed: If code -7 was selected, then no additional choices were allowed. If code -3 …	binary.6149_3.txt	1741323351668EUR_vtg.txt.gz
0.08189	0.03892	2.104	0.03536	0.06259	0.008246	1.378	0.05554	-0.002401	0.008467	Hyperlipidemia	426603	335680	90923	MVP	https://phenomics.va.ornl.gov/web/cipher/pheweb	https://www.science.org/doi/10.1126/science.adj1738	MVP_R4.1000G_AGR.Phe_272_1.EUR.GIA.dbGaP.txt.gz_ldsc	1741323351668EUR_vtg.txt.gz
0.117	0.05566	2.101	0.03561	0.01394	0.0019	1.074	0.008765	0.0009307	0.005798	Takes medication for other skeletal/muscular problem?	315668	29860	285808	MVP	https://phenomics.va.ornl.gov/web/cipher/pheweb	https://www.science.org/doi/10.1126/science.adj2889	MVP_R4.1000G_AGR.SkMsOthMed.EUR.GIA.dbGaP.txt.gz_ldsc	1741323351668EUR_vtg.txt.gz
0.0819	0.03902	2.099	0.03584	0.06167	0.008142	1.357	0.05469	-0.002453	0.008419	Disorders of lipoid metabolism	426570	335948	90622	MVP	https://phenomics.va.ornl.gov/web/cipher/pheweb	https://www.science.org/doi/10.1126/science.adj1737	MVP_R4.1000G_AGR.Phe_272.EUR.GIA.dbGaP.txt.gz_ldsc	1741323351668EUR_vtg.txt.gz
0.1736	0.08281	2.096	0.03605	1.597	0.3453	1.095	0.01217	-0.003175	0.006521	Crohn's disease vs ulcerative colitis	12924	6968	5956	European	https://www.ebi.ac.uk/gwas/studies/GCST90016611	Crohn's disease vs ulcerative colitis	UC_vs_CD.ctg	1741323351668EUR_vtg.txt.gz
0.1219	0.05822	2.094	0.03627	0.00731	0.001396	1.047	0.007579	-0.007956	0.005588	Ventral hernia	442687	9512	433175	MVP	https://phenomics.va.ornl.gov/web/cipher/pheweb	https://www.science.org/doi/10.1126/science.adj2335	MVP_R4.1000G_AGR.Phe_550_5.EUR.GIA.dbGaP.txt.gz_ldsc	1741323351668EUR_vtg.txt.gz
0.09995	0.04776	2.093	0.03636	0.01695	0.002624	1.094	0.02051	-0.01254	0.007017	Abnormal results of function study of liver	428257	30105	398152	MVP	https://phenomics.va.ornl.gov/web/cipher/pheweb	https://www.science.org/doi/10.1126/science.adj2379	MVP_R4.1000G_AGR.Phe_573_7.EUR.GIA.dbGaP.txt.gz_ldsc	1741323351668EUR_vtg.txt.gz
0.05613	0.02685	2.09	0.03658	0.03584	0.005577	1.089	0.0671	-0.01075	0.00479	Docosahexaenoic Acid to Total Fatty Acids percentage	95372	NA	NA	UKB (EUR)	https://www.nature.com/articles/s41467-024-52310-9	GCST90445847. NMR	GCST90445847.tsv.common.ctg	1741323351668EUR_vtg.txt.gz
0.218	0.1043	2.089	0.03667	0.004166	0.001386	1.019	0.007452	0.0003647	0.006205	Diagnoses - main ICD10: R31 Unspecified haematuria	361194	11283	349911	UK Biobank	https://docs.google.com/spreadsheets/d/1kvPoupSzsSFBNSztMzl04xMoSC3Kcx3CrjVf4yBmESU/edit?ts=5b5f17db#gid=227859291	PHESANT Transformation:NA-Notes:NA-Variable type:categorical-Phenotype ID:R31	categorical.R31.txt	1741323351668EUR_vtg.txt.gz
0.09189	0.04398	2.089	0.03669	0.01725	0.001691	1.105	0.009292	-0.001854	0.006493	Other disorders of eyelids	425431	31635	393796	MVP	https://phenomics.va.ornl.gov/web/cipher/pheweb	https://www.science.org/doi/10.1126/science.adj2010	MVP_R4.1000G_AGR.Phe_374.EUR.GIA.dbGaP.txt.gz_ldsc	1741323351668EUR_vtg.txt.gz
0.066	0.03161	2.088	0.03682	0.0602	0.002785	1.048	0.01232	-0.002137	0.006352	Mean time to correctly identify matches	358695	NA	NA	UK Biobank	https://docs.google.com/spreadsheets/d/1kvPoupSzsSFBNSztMzl04xMoSC3Kcx3CrjVf4yBmESU/edit?ts=5b5f17db#gid=227859291	PHESANT Transformation:20023_0|| INTEGER || CONTINUOUS || ||-Notes:This field is the mean duration to first press of snap-button summed over rounds in which both cards matched. It gives a crude measure of the raw processing+reaction speed of a participant. The following data points were excluded when forming the average: Rounds 0-4 were regarded as training; Times under 50ms must be due to antici…	20023_raw.txt	1741323351668EUR_vtg.txt.gz
0.1952	0.09349	2.087	0.03684	0.00385	0.001236	1.01	0.007423	-0.0006829	0.005922	Asthma, hospital admissions 1	361194	1986	359208	UK Biobank	https://docs.google.com/spreadsheets/d/1kvPoupSzsSFBNSztMzl04xMoSC3Kcx3CrjVf4yBmESU/edit?ts=5b5f17db#gid=227859291	PHESANT Transformation:NA-Notes:NA-Variable type:categorical-Phenotype ID:ASTHMA_HOSPITAL1	categorical.ASTHMA_HOSPITAL1.txt	1741323351668EUR_vtg.txt.gz
0.1469	0.07046	2.084	0.03712	0.006904	0.001198	1.048	0.007359	-0.006817	0.006271	Other and unspecified disorder	431683	13405	418278	MVP	https://phenomics.va.ornl.gov/web/cipher/pheweb	https://www.science.org/doi/10.1126/science.adj2630	MVP_R4.1000G_AGR.Phe_724.EUR.GIA.dbGaP.txt.gz_ldsc	1741323351668EUR_vtg.txt.gz
0.06046	0.02905	2.081	0.0374	0.08461	0.007618	1.375	0.04367	0.001383	0.007575	Atrial fibrillation	437772	71577	366195	MVP	https://phenomics.va.ornl.gov/web/cipher/pheweb	https://www.science.org/doi/10.1126/science.adj2114	MVP_R4.1000G_AGR.Phe_427_21.EUR.GIA.dbGaP.txt.gz_ldsc	1741323351668EUR_vtg.txt.gz
0.08994	0.04325	2.079	0.03758	0.01813	0.001977	1.06	0.009715	-0.003766	0.005922	Benign neoplasm of skin	398521	38768	359753	MVP (EUR)	https://ftp.ncbi.nlm.nih.gov/dbgap/studies/phs002453/analyses/GIA/	Phe_216. PheCodes_Neoplasms	MVP_R4.1000G_AGR.Phe_216.EUR.GIA.dbGaP.txt.gz.ctg	1741323351668EUR_vtg.txt.gz
0.2056	0.09897	2.078	0.03774	0.1237	0.04701	0.9919	0.006853	-0.006358	0.005946	Underlying (primary) cause of death: ICD10: C34.9 Bronchus or lung, unspecified	9092	1100	7992	UK Biobank	https://docs.google.com/spreadsheets/d/1kvPoupSzsSFBNSztMzl04xMoSC3Kcx3CrjVf4yBmESU/edit?ts=5b5f17db#gid=227859291	PHESANT Transformation:40001_0 || CAT-SINGLE || CAT-SINGLE-BINARY-VAR: C349 || Inc(>=10): C349(1100) ||-Notes:Underlying/primary cause of death reported for participant. Note that this may not match the text value in ~F40010~ due to transcription errors at source. Acquired from central registry.-Variable type:binary	binary.40001_C349.txt	1741323351668EUR_vtg.txt.gz
-0.09367	0.04514	-2.075	0.03796	0.01686	0.001833	1.025	0.009297	0.004526	0.00586	Frequency of solarium/sunlamp use	340643	NA	NA	UK Biobank	https://docs.google.com/spreadsheets/d/1kvPoupSzsSFBNSztMzl04xMoSC3Kcx3CrjVf4yBmESU/edit?ts=5b5f17db#gid=227859291	PHESANT Transformation:2277_0|| INTEGER || reassignments: -1=NA|-3=NA|-10=NA || CONTINUOUS || >20% IN ONE CATEGORY || Split into three bins: 0: [0,0], 1: (0,6), 2: >=6 ||cat N: 324579, 6805, 9259 || CAT-ORD || order: 0|1|2 || num categories: 3 ||-Notes:ACE touchscreen question How many times a year would you use a solarium or sunlamp? The following checks were performed: If answer > 9999 then rej…	2277.gwas.imputed_v3.both_sexes.tsv	1741323351668EUR_vtg.txt.gz
0.1541	0.07427	2.075	0.03799	0.01125	0.002666	1.013	0.008292	-0.006291	0.005583	Non-butter spread type details: Flora Pro-Active or Benecol	190094	29048	161046	UK Biobank	https://docs.google.com/spreadsheets/d/1kvPoupSzsSFBNSztMzl04xMoSC3Kcx3CrjVf4yBmESU/edit?ts=5b5f17db#gid=227859291	PHESANT Transformation:2654_0 || CAT-SINGLE || CAT-SINGLE-BINARY-VAR: 2 || Inc(>=10): 2(29048) ||-Notes:ACE touchscreen question What type of spread do you mainly use? If the participant activated the Help button they were shown the message: If you use more than one type of spread, please select the one that you use the most. If you are unsure, select Do not know. ~F2654~ was collected from parti…	binary.2654_2.txt	1741323351668EUR_vtg.txt.gz
0.08983	0.0433	2.074	0.03803	0.01813	0.001975	1.06	0.009719	-0.003744	0.005926	Benign neoplasm of skin	398521	38768	359753	MVP	https://phenomics.va.ornl.gov/web/cipher/pheweb	https://www.science.org/doi/10.1126/science.adj1648	MVP_R4.1000G_AGR.Phe_216.EUR.GIA.dbGaP.txt.gz_ldsc	1741323351668EUR_vtg.txt.gz
0.1757	0.0847	2.074	0.03806	0.004372	0.001092	1.027	0.007656	-0.008083	0.005923	Derangement of joint, non-traumatic	433518	9933	423585	MVP	https://phenomics.va.ornl.gov/web/cipher/pheweb	https://www.science.org/doi/10.1126/science.adj2685	MVP_R4.1000G_AGR.Phe_742.EUR.GIA.dbGaP.txt.gz_ldsc	1741323351668EUR_vtg.txt.gz
0.2374	0.1146	2.073	0.0382	0.002712	0.00136	0.9917	0.008272	-0.003877	0.005353	COPD related to chronic (opportunist) infections	361194	477	360717	UK Biobank	https://docs.google.com/spreadsheets/d/1kvPoupSzsSFBNSztMzl04xMoSC3Kcx3CrjVf4yBmESU/edit?ts=5b5f17db#gid=227859291	PHESANT Transformation:NA-Notes:NA-Variable type:categorical-Phenotype ID:COPD_OPPORTUNIST_INFECTIONS	categorical.COPD_OPPORTUNIST_INFECTIONS.txt	1741323351668EUR_vtg.txt.gz
0.1793	0.08654	2.072	0.03829	0.004701	0.001093	1.036	0.007692	-0.01137	0.006143	Conjunctivitis, noninfectious	437072	9521	427551	MVP	https://phenomics.va.ornl.gov/web/cipher/pheweb	https://www.science.org/doi/10.1126/science.adj2006	MVP_R4.1000G_AGR.Phe_371_2.EUR.GIA.dbGaP.txt.gz_ldsc	1741323351668EUR_vtg.txt.gz
0.1898	0.09166	2.071	0.03839	0.002763	0.000994	1.007	0.007246	-0.005408	0.005653	Nonspecific elevation of levels of transaminase or lactic acid dehydrogenase [LDH]	438981	5556	433425	MVP	https://phenomics.va.ornl.gov/web/cipher/pheweb	https://www.science.org/doi/10.1126/science.adj2378	MVP_R4.1000G_AGR.Phe_573_6.EUR.GIA.dbGaP.txt.gz_ldsc	1741323351668EUR_vtg.txt.gz
0.2016	0.09739	2.07	0.03842	0.003218	0.00113	1.015	0.007917	-0.00238	0.005811	Dentofacial anomalies, including malocclusion	439801	6351	433450	MVP (EUR)	https://ftp.ncbi.nlm.nih.gov/dbgap/studies/phs002453/analyses/GIA/	Phe_524. PheCodes_Digestive System	MVP_R4.1000G_AGR.Phe_524.EUR.GIA.dbGaP.txt.gz.ctg	1741323351668EUR_vtg.txt.gz
-0.1223	0.05909	-2.07	0.03849	0.0715	0.01346	1.032	0.01025	0.01317	0.005333	ECG, heart rate	53777	NA	NA	UK Biobank	https://docs.google.com/spreadsheets/d/1kvPoupSzsSFBNSztMzl04xMoSC3Kcx3CrjVf4yBmESU/edit?ts=5b5f17db#gid=227859291	PHESANT Transformation:5983_0|| INTEGER || CONTINUOUS || ||-Notes:ECG, heart rate The Bike Test consists of many phases. A phase is generally divided into number of stages. At various points during the test, called trends, readings about heart rate, workload etc are recorded. This field contains heart rate (beats per minute) at the time of the trend entry-Variable type:continuous_raw	5983_raw.txt	1741323351668EUR_vtg.txt.gz
0.1315	0.06352	2.07	0.0385	0.006961	0.001719	1.007	0.00839	-0.009037	0.005709	Diagnoses - main ICD10: I80 Phlebitis and thrombophlebitis	361194	2289	358905	UK Biobank	https://docs.google.com/spreadsheets/d/1kvPoupSzsSFBNSztMzl04xMoSC3Kcx3CrjVf4yBmESU/edit?ts=5b5f17db#gid=227859291	PHESANT Transformation:NA-Notes:NA-Variable type:categorical-Phenotype ID:I80	categorical.I80.txt	1741323351668EUR_vtg.txt.gz
0.2015	0.0975	2.066	0.03878	0.003216	0.00113	1.015	0.00792	-0.002344	0.005811	Dentofacial anomalies, including malocclusion	439801	6351	433450	MVP	https://phenomics.va.ornl.gov/web/cipher/pheweb	https://www.science.org/doi/10.1126/science.adj2280	MVP_R4.1000G_AGR.Phe_524.EUR.GIA.dbGaP.txt.gz_ldsc	1741323351668EUR_vtg.txt.gz
0.1934	0.09363	2.065	0.0389	0.003806	0.001223	1.01	0.007404	-0.0005484	0.005863	Childhood asthma (age<16)	361194	1993	359201	UK Biobank	https://docs.google.com/spreadsheets/d/1kvPoupSzsSFBNSztMzl04xMoSC3Kcx3CrjVf4yBmESU/edit?ts=5b5f17db#gid=227859291	PHESANT Transformation:NA-Notes:NA-Variable type:categorical-Phenotype ID:ASTHMA_CHILD	categorical.ASTHMA_CHILD.txt	1741323351668EUR_vtg.txt.gz
0.1934	0.09363	2.065	0.0389	0.003806	0.001223	1.01	0.007404	-0.0005484	0.005863	Asthma	361194	1993	359201	UK Biobank	https://docs.google.com/spreadsheets/d/1kvPoupSzsSFBNSztMzl04xMoSC3Kcx3CrjVf4yBmESU/edit?ts=5b5f17db#gid=227859291	PHESANT Transformation:NA-Notes:NA-Variable type:categorical-Phenotype ID:J10_ASTHMA_MAIN	categorical.J10_ASTHMA_MAIN.txt	1741323351668EUR_vtg.txt.gz
0.1934	0.09363	2.065	0.0389	0.003806	0.001223	1.01	0.007404	-0.0005484	0.005863	Asthma	361194	1993	359201	UK Biobank	https://docs.google.com/spreadsheets/d/1kvPoupSzsSFBNSztMzl04xMoSC3Kcx3CrjVf4yBmESU/edit?ts=5b5f17db#gid=227859291	PHESANT Transformation:NA-Notes:NA-Variable type:categorical-Phenotype ID:J10_ASTHMA	categorical.J10_ASTHMA.txt	1741323351668EUR_vtg.txt.gz
0.1559	0.07552	2.065	0.03896	0.005473	0.001239	1.05	0.008151	-0.01278	0.00564	Postinflammatory pulmonary fibrosis	444066	5815	438251	MVP	https://phenomics.va.ornl.gov/web/cipher/pheweb	https://www.science.org/doi/10.1126/science.adj2234	MVP_R4.1000G_AGR.Phe_502.EUR.GIA.dbGaP.txt.gz_ldsc	1741323351668EUR_vtg.txt.gz
0.1393	0.06748	2.064	0.03902	0.00823	0.001338	1.052	0.008425	-0.01448	0.006153	Epilepsy, recurrent seizures, convulsions	440880	18387	422493	MVP	https://phenomics.va.ornl.gov/web/cipher/pheweb	https://www.science.org/doi/10.1126/science.adj1914	MVP_R4.1000G_AGR.Phe_345.EUR.GIA.dbGaP.txt.gz_ldsc	1741323351668EUR_vtg.txt.gz
0.1083	0.05246	2.064	0.03905	0.01269	0.003334	1.084	0.01485	-0.00165	0.006431	Nontoxic nodular goiter	446291	15286	431005	MVP	https://phenomics.va.ornl.gov/web/cipher/pheweb	https://www.science.org/doi/10.1126/science.adj1667	MVP_R4.1000G_AGR.Phe_241.EUR.GIA.dbGaP.txt.gz_ldsc	1741323351668EUR_vtg.txt.gz
0.1748	0.08476	2.062	0.03921	0.01392	0.004019	1.013	0.007537	-0.004068	0.005622	Speech-reception-threshold (SRT) estimate (right)	114720	NA	NA	UK Biobank	https://docs.google.com/spreadsheets/d/1kvPoupSzsSFBNSztMzl04xMoSC3Kcx3CrjVf4yBmESU/edit?ts=5b5f17db#gid=227859291	PHESANT Transformation:20021_0|| CONTINUOUS MAIN || CONTINUOUS || ||-Notes:SRT is the Speech Reception Threshold, defined here as the signal-to-noise ratio at which half of the presented speech can be understood correctly. This was estimated as the value of the last round of the signal-to-noise ratio measurement for participants who completed all 15 rounds of the test (right-ear).-Variable type:c…	20021_raw.txt	1741323351668EUR_vtg.txt.gz
0.2024	0.09816	2.062	0.03925	0.002852	0.001112	1.041	0.007498	-0.0008013	0.006552	Heart failure NOS	443759	4704	439055	MVP	https://phenomics.va.ornl.gov/web/cipher/pheweb	https://www.science.org/doi/10.1126/science.adj2128	MVP_R4.1000G_AGR.Phe_428_2.EUR.GIA.dbGaP.txt.gz_ldsc	1741323351668EUR_vtg.txt.gz
0.07652	0.03712	2.061	0.03927	0.01613	0.00113	1.053	0.01165	0.004816	0.006664	COPD (EUR Biobanks)	995917	58559	937358	Global Biobank Meta-analysis Initiative Meta-analysis Initiative: powering genetic discovery across human diseases. 2029	https://www.globalbiobankmeta.org/resources	https://www.sciencedirect.com/science/article/pii/S2666979X22001410?via%3Dihub	COPD_Bothsex_eur_inv_var_meta_GBMI_052021_nbbkgt1.txt.gz.ctgvl	1741323351668EUR_vtg.txt.gz
0.0819	0.03976	2.06	0.03943	0.04031	0.003309	1.02	0.01192	0.001335	0.006705	Suffer from 'nerves'	348082	73938	274144	UK Biobank	https://docs.google.com/spreadsheets/d/1kvPoupSzsSFBNSztMzl04xMoSC3Kcx3CrjVf4yBmESU/edit?ts=5b5f17db#gid=227859291	PHESANT Transformation:2010_0|| CAT-SINGLE || Inc(>=10): 0(274144) || Inc(>=10): 1(73938) || CAT-SINGLE-BINARY || sample 274144/73938(348082) ||-Notes:ACE touchscreen question Do you suffer from 'nerves'? If the participant activated the Help button they were shown the message: Work through these questions quickly and do not think about the exact meaning of the question-Variable type:binary	binary.2010.txt	1741323351668EUR_vtg.txt.gz
0.1517	0.07364	2.06	0.03945	0.005176	0.001347	1.044	0.008624	-0.001022	0.005829	Diseases of pancreas	444440	12564	431876	MVP	https://phenomics.va.ornl.gov/web/cipher/pheweb	https://www.science.org/doi/10.1126/science.adj2392	MVP_R4.1000G_AGR.Phe_577.EUR.GIA.dbGaP.txt.gz_ldsc	1741323351668EUR_vtg.txt.gz
-0.07112	0.03454	-2.059	0.0395	0.0256	0.003331	1.025	0.01204	0.01071	0.004423	Total Concentration of Branched-Chain Amino Acids (Leucine + Isoleucine + Valine)	95372	NA	NA	UKB (EUR)	https://www.nature.com/articles/s41467-024-52310-9	GCST90446062. NMR	GCST90446062.h.tsv.gz.ctg	1741323351668EUR_vtg.txt.gz
0.1164	0.05662	2.057	0.03972	0.009223	0.00124	1.063	0.008161	-0.003673	0.006014	Paroxysmal tachycardia, unspecified	438169	15548	422621	MVP	https://phenomics.va.ornl.gov/web/cipher/pheweb	https://www.science.org/doi/10.1126/science.adj2110	MVP_R4.1000G_AGR.Phe_427_1.EUR.GIA.dbGaP.txt.gz_ldsc	1741323351668EUR_vtg.txt.gz
-0.1267	0.06164	-2.056	0.03978	0.009858	0.001777	1.016	0.007969	0.008054	0.005862	Illness, injury, bereavement, stress in last 2 years: Serious illness, injury or assault of a close relative	358836	41459	317377	UK Biobank	https://docs.google.com/spreadsheets/d/1kvPoupSzsSFBNSztMzl04xMoSC3Kcx3CrjVf4yBmESU/edit?ts=5b5f17db#gid=227859291	PHESANT Transformation:6145_0 || CAT-MUL-BINARY-VAR 2 || NO_NAN Remove NA participants 512 || Removed 1846 examples != 2 but with missing value (<0) || sample 317377/41459(358836) ||-Notes:ACE touchscreen question In the last 2 years have you experienced any of the following? (You can select more than one answer) The following checks were performed: If code -7 was selected, then no additional cho…	binary.6145_2.txt	1741323351668EUR_vtg.txt.gz
0.0634	0.03084	2.056	0.03978	0.2734	0.01946	2.238	0.08837	0.01201	0.01282	platelet count (maximum, inv-norm transformed)	406601	NA	NA	MVP	https://phenomics.va.ornl.gov/web/cipher/pheweb	https://www.science.org/doi/10.1126/science.adj2834	MVP_R4.1000G_AGR.Platelet_Max_INT.EUR.GIA.dbGaP.txt.gz_ldsc	1741323351668EUR_vtg.txt.gz
0.1627	0.07916	2.055	0.03988	0.005085	0.001172	1.034	0.007761	-0.01008	0.006135	Allergic conjunctivitis	438171	8602	429569	MVP	https://phenomics.va.ornl.gov/web/cipher/pheweb	https://www.science.org/doi/10.1126/science.adj2007	MVP_R4.1000G_AGR.Phe_371_21.EUR.GIA.dbGaP.txt.gz_ldsc	1741323351668EUR_vtg.txt.gz
-0.09207	0.04482	-2.054	0.03996	0.02018	0.001835	1.061	0.008489	0.002842	0.006005	Nitrogen dioxide air pollution; 2005	356078	NA	NA	UK Biobank	https://docs.google.com/spreadsheets/d/1kvPoupSzsSFBNSztMzl04xMoSC3Kcx3CrjVf4yBmESU/edit?ts=5b5f17db#gid=227859291	PHESANT Transformation:24016_0|| CONTINUOUS MAIN || CONTINUOUS || ||-Notes:Nitrogen dioxide; Land Use Regression (LUR) estimate for annual average 2005.-Variable type:continuous_raw	24016_raw.txt	1741323351668EUR_vtg.txt.gz
0.1824	0.08889	2.052	0.04015	0.004234	0.001273	0.9891	0.00708	-0.006201	0.006469	NA	361194	1944	359250	UK Biobank	https://docs.google.com/spreadsheets/d/1kvPoupSzsSFBNSztMzl04xMoSC3Kcx3CrjVf4yBmESU/edit?ts=5b5f17db#gid=227859291	PHESANT Transformation:NA-Notes:NA-Variable type:categorical-Phenotype ID:C_RESPIRATORY_INTRATHORACIC	categorical.C_RESPIRATORY_INTRATHORACIC.txt	1741323351668EUR_vtg.txt.gz
0.1824	0.08889	2.052	0.04015	0.004234	0.001273	0.9891	0.00708	-0.006201	0.006469	Malignant neoplasm of respiratory system and intrathoracic organs	361194	1944	359250	UK Biobank	https://docs.google.com/spreadsheets/d/1kvPoupSzsSFBNSztMzl04xMoSC3Kcx3CrjVf4yBmESU/edit?ts=5b5f17db#gid=227859291	PHESANT Transformation:NA-Notes:NA-Variable type:categorical-Phenotype ID:C3_RESPIRATORY_INTRATHORACIC	categorical.C3_RESPIRATORY_INTRATHORACIC.txt	1741323351668EUR_vtg.txt.gz
0.1987	0.09684	2.052	0.04015	0.003117	0.001013	1.017	0.007457	-0.0001098	0.005911	Other unspecified back disorders	444570	4983	439587	MVP	https://phenomics.va.ornl.gov/web/cipher/pheweb	https://www.science.org/doi/10.1126/science.adj2633	MVP_R4.1000G_AGR.Phe_724_9.EUR.GIA.dbGaP.txt.gz_ldsc	1741323351668EUR_vtg.txt.gz
0.08373	0.04094	2.045	0.04081	0.008191	0.00061	1.031	0.008619	-8.22e-05	0.005949	Heart Failure (HF) (EUR Biobanks)	1020441	52496	967945	Global Biobank Meta-analysis Initiative Meta-analysis Initiative: powering genetic discovery across human diseases. 2035	https://www.globalbiobankmeta.org/resources	https://www.sciencedirect.com/science/article/pii/S2666979X22001410?via%3Dihub	HF_Bothsex_eur_inv_var_meta_GBMI_052021_nbbkgt1.txt.gz.ctgvl	1741323351668EUR_vtg.txt.gz
0.2503	0.1225	2.044	0.04095	0.003887	0.001345	0.9996	0.007903	-0.01165	0.005998	Non-cancer illness code, self-reported: sarcoidosis	361141	705	360436	UK Biobank	https://docs.google.com/spreadsheets/d/1kvPoupSzsSFBNSztMzl04xMoSC3Kcx3CrjVf4yBmESU/edit?ts=5b5f17db#gid=227859291	PHESANT Transformation:20002_0 || CAT-MUL-BINARY-VAR 1371 || Indicator name x135_0_0 || Remove indicator var NAs: 53 || Remove indicator var <0: 0 || Removed 0 examples != 1371 but with missing value (<0) || sample 360436/705(361141) ||-Notes:Code for non-cancer illness. If the participant was uncertain of the type of illness they had had, then they described it to the interviewer (a trained nurs…	binary.20002_1371.txt	1741323351668EUR_vtg.txt.gz
0.1883	0.09217	2.043	0.04104	0.01471	0.004356	1.011	0.006628	-0.0006392	0.00626	Breathing problems improved/stopped away from workplace or on holiday: No	91149	4382	86767	UK Biobank	https://docs.google.com/spreadsheets/d/1kvPoupSzsSFBNSztMzl04xMoSC3Kcx3CrjVf4yBmESU/edit?ts=5b5f17db#gid=227859291	PHESANT Transformation:22618_0 || CAT-MUL-BINARY-VAR 0 || Indicator name x22616_0_0 || Remove indicator var NAs: 270045 || Remove indicator var <0: 0 || Removed 0 examples != 0 but with missing value (<0) || sample 86767/4382(91149) ||-Notes:Participants who indicated they had breathing problems during a job were asked: Did these problems improve or stop when you were away from the workplace or o…	binary.22618_0.txt	1741323351668EUR_vtg.txt.gz
0.1456	0.07139	2.039	0.04146	0.005818	0.001434	1.008	0.008235	0.005321	0.005803	Diseases of the skin and subcutaneous tissue	361194	27074	334120	UK Biobank	https://docs.google.com/spreadsheets/d/1kvPoupSzsSFBNSztMzl04xMoSC3Kcx3CrjVf4yBmESU/edit?ts=5b5f17db#gid=227859291	PHESANT Transformation:NA-Notes:NA-Variable type:categorical-Phenotype ID:XII_SKIN_SUBCUTAN	categorical.XII_SKIN_SUBCUTAN.txt	1741323351668EUR_vtg.txt.gz
0.07017	0.03445	2.037	0.04168	0.05114	0.002826	1.294	0.01252	0.0006711	0.00689	Osteoarthrosis NOS	404460	133709	270751	MVP	https://phenomics.va.ornl.gov/web/cipher/pheweb	https://www.science.org/doi/10.1126/science.adj2679	MVP_R4.1000G_AGR.Phe_740_9.EUR.GIA.dbGaP.txt.gz_ldsc	1741323351668EUR_vtg.txt.gz
0.2303	0.1131	2.036	0.04177	0.002658	0.001143	1.001	0.006938	-0.003482	0.006213	Diagnoses - main ICD10: C34 Malignant neoplasm of bronchus and lung	361194	1427	359767	UK Biobank	https://docs.google.com/spreadsheets/d/1kvPoupSzsSFBNSztMzl04xMoSC3Kcx3CrjVf4yBmESU/edit?ts=5b5f17db#gid=227859291	PHESANT Transformation:NA-Notes:NA-Variable type:categorical-Phenotype ID:C34	categorical.C34.txt	1741323351668EUR_vtg.txt.gz
-0.1051	0.05166	-2.035	0.04185	0.01251	0.001413	1.007	0.007141	0.009661	0.005329	Milk type used: Semi-skimmed	360806	234870	125936	UK Biobank	https://docs.google.com/spreadsheets/d/1kvPoupSzsSFBNSztMzl04xMoSC3Kcx3CrjVf4yBmESU/edit?ts=5b5f17db#gid=227859291	PHESANT Transformation:1418_0 || CAT-SINGLE || CAT-SINGLE-BINARY-VAR: 2 || Inc(>=10): 2(234870) ||-Notes:ACE touchscreen question What type of milk do you mainly use? If the participant activated the Help button they were shown the message: If you use more than one type of milk, please select the one that you drink the most. If you are unsure, select Do not know.-Variable type:binary	binary.1418_2.txt	1741323351668EUR_vtg.txt.gz
0.1299	0.06385	2.034	0.04194	0.008077	0.001303	1.014	0.007179	0.0009211	0.005544	Pain type(s) experienced in last month: Pain all over the body	360391	5530	354861	UK Biobank	https://docs.google.com/spreadsheets/d/1kvPoupSzsSFBNSztMzl04xMoSC3Kcx3CrjVf4yBmESU/edit?ts=5b5f17db#gid=227859291	PHESANT Transformation:6159_0 || CAT-MUL-BINARY-VAR 8 || NO_NAN Remove NA participants 180 || Removed 623 examples != 8 but with missing value (<0) || sample 354861/5530(360391) || SKIP_val:-3 < 0 ||-Notes:ACE touchscreen question In the last month have you experienced any of the following that interfered with your usual activites? (You can select more than one answer) The following checks were p…	binary.6159_8.txt	1741323351668EUR_vtg.txt.gz
0.09048	0.0445	2.033	0.04203	0.01759	0.001535	1.105	0.009172	-0.01266	0.005659	Varicose veins of lower extremity	438521	15944	422577	MVP	https://phenomics.va.ornl.gov/web/cipher/pheweb	https://www.science.org/doi/10.1126/science.adj2178	MVP_R4.1000G_AGR.Phe_454_1.EUR.GIA.dbGaP.txt.gz_ldsc	1741323351668EUR_vtg.txt.gz
0.0973	0.04793	2.03	0.04236	0.02093	0.00173	1.122	0.009451	-0.003397	0.006577	Abnormality of gait	410160	65023	345137	MVP	https://phenomics.va.ornl.gov/web/cipher/pheweb	https://www.science.org/doi/10.1126/science.adj1928	MVP_R4.1000G_AGR.Phe_350_2.EUR.GIA.dbGaP.txt.gz_ldsc	1741323351668EUR_vtg.txt.gz
0.1795	0.0885	2.029	0.04247	0.003954	0.001174	0.9985	0.006868	-0.00311	0.006414	Lung cancer and mesothelioma	361194	2007	359187	UK Biobank	https://docs.google.com/spreadsheets/d/1kvPoupSzsSFBNSztMzl04xMoSC3Kcx3CrjVf4yBmESU/edit?ts=5b5f17db#gid=227859291	PHESANT Transformation:NA-Notes:NA-Variable type:categorical-Phenotype ID:LUNG_CANCER_MESOT	categorical.LUNG_CANCER_MESOT.txt	1741323351668EUR_vtg.txt.gz
0.1795	0.0885	2.029	0.04247	0.003954	0.001174	0.9985	0.006868	-0.00311	0.006414	Lung cancer and mesothelioma	361194	2007	359187	UK Biobank	https://docs.google.com/spreadsheets/d/1kvPoupSzsSFBNSztMzl04xMoSC3Kcx3CrjVf4yBmESU/edit?ts=5b5f17db#gid=227859291	PHESANT Transformation:NA-Notes:NA-Variable type:categorical-Phenotype ID:LUNG_CANCER	categorical.LUNG_CANCER.txt	1741323351668EUR_vtg.txt.gz
-0.1039	0.05129	-2.026	0.04276	0.01477	0.001785	1.065	0.01024	0.008296	0.006075	Chronic kidney disease (CKD)	480698	41395	439303	CKDGen Consortium (EUR)	https://ckdgen.imbi.uni-freiburg.de/datasets/Wuttke_2019	Chronic kidney disease (CKD) European Meta-analysis	1706805677763CKD_GSMR.txt.gz	1741323351668EUR_vtg.txt.gz
0.1566	0.07731	2.026	0.04276	0.004621	0.001294	1.035	0.00763	-0.01355	0.005772	Peripheral retinal degenerations	441061	7208	433853	MVP	https://phenomics.va.ornl.gov/web/cipher/pheweb	https://www.science.org/doi/10.1126/science.adj1961	MVP_R4.1000G_AGR.Phe_362_6.EUR.GIA.dbGaP.txt.gz_ldsc	1741323351668EUR_vtg.txt.gz
0.09891	0.04889	2.023	0.04308	0.01504	0.001781	1.092	0.009379	-0.000472	0.006146	Symptoms and disorders of the joints	401903	45775	356128	MVP	https://phenomics.va.ornl.gov/web/cipher/pheweb	https://www.science.org/doi/10.1126/science.adj2680	MVP_R4.1000G_AGR.Phe_741.EUR.GIA.dbGaP.txt.gz_ldsc	1741323351668EUR_vtg.txt.gz
0.127	0.06284	2.021	0.04323	0.009029	0.001524	1.039	0.00773	-0.009313	0.006129	Takes medication for circulatory problem?	315668	18522	297146	MVP	https://phenomics.va.ornl.gov/web/cipher/pheweb	https://www.science.org/doi/10.1126/science.adj1244	MVP_R4.1000G_AGR.CircOthMed.EUR.GIA.dbGaP.txt.gz_ldsc	1741323351668EUR_vtg.txt.gz
0.09332	0.04618	2.021	0.04332	0.01734	0.001751	1.019	0.008051	-0.005249	0.005674	Milk type used: Skimmed	360806	74087	286719	UK Biobank	https://docs.google.com/spreadsheets/d/1kvPoupSzsSFBNSztMzl04xMoSC3Kcx3CrjVf4yBmESU/edit?ts=5b5f17db#gid=227859291	PHESANT Transformation:1418_0 || CAT-SINGLE || CAT-SINGLE-BINARY-VAR: 3 || Inc(>=10): 3(74087) ||-Notes:ACE touchscreen question What type of milk do you mainly use? If the participant activated the Help button they were shown the message: If you use more than one type of milk, please select the one that you drink the most. If you are unsure, select Do not know.-Variable type:binary	binary.1418_3.txt	1741323351668EUR_vtg.txt.gz
0.09916	0.04912	2.019	0.04352	0.01583	0.001697	1.093	0.01007	-0.006194	0.006152	Testicular dysfunction	407694	24723	382971	MVP	https://phenomics.va.ornl.gov/web/cipher/pheweb	https://www.science.org/doi/10.1126/science.adj1714	MVP_R4.1000G_AGR.Phe_257.EUR.GIA.dbGaP.txt.gz_ldsc	1741323351668EUR_vtg.txt.gz
-0.06602	0.03272	-2.018	0.04363	0.1143	0.007211	1.661	0.03359	-0.005038	0.009853	blood urea nitrogen (BUN, minimum, inv-norm transformed)	419128	NA	NA	MVP	https://phenomics.va.ornl.gov/web/cipher/pheweb	https://www.science.org/doi/10.1126/science.adj1212	MVP_R4.1000G_AGR.BUN_BSP_Min_INT.EUR.GIA.dbGaP.txt.gz_ldsc	1741323351668EUR_vtg.txt.gz
0.2218	0.11	2.016	0.0438	0.002606	0.001086	1.033	0.008162	-0.009091	0.005406	Nephritis; nephrosis; renal sclerosis	444906	6106	438800	MVP	https://phenomics.va.ornl.gov/web/cipher/pheweb	https://www.science.org/doi/10.1126/science.adj2404	MVP_R4.1000G_AGR.Phe_580.EUR.GIA.dbGaP.txt.gz_ldsc	1741323351668EUR_vtg.txt.gz
0.1044	0.05192	2.011	0.04436	0.01235	0.001373	1.081	0.007351	-0.0007718	0.005895	Contusion	403903	22688	381215	MVP	https://phenomics.va.ornl.gov/web/cipher/pheweb	https://www.science.org/doi/10.1126/science.adj2802	MVP_R4.1000G_AGR.Phe_916.EUR.GIA.dbGaP.txt.gz_ldsc	1741323351668EUR_vtg.txt.gz
-0.078	0.0388	-2.01	0.04442	0.1083	0.01091	1.059	0.01224	0.002708	0.00625	Corneal hysteresis (right)	76630	NA	NA	UK Biobank	https://docs.google.com/spreadsheets/d/1kvPoupSzsSFBNSztMzl04xMoSC3Kcx3CrjVf4yBmESU/edit?ts=5b5f17db#gid=227859291	PHESANT Transformation:5256_0|| CONTINUOUS MAIN || CONTINUOUS || ||-Notes:corneal hysteresis for right eye (a measure of viscuous damping in the cornea)-Variable type:continuous_raw	5256_raw.txt	1741323351668EUR_vtg.txt.gz
0.2169	0.1079	2.01	0.04445	0.002838	0.001353	0.9931	0.008375	-0.002187	0.005518	NA	361194	509	360685	UK Biobank	https://docs.google.com/spreadsheets/d/1kvPoupSzsSFBNSztMzl04xMoSC3Kcx3CrjVf4yBmESU/edit?ts=5b5f17db#gid=227859291	PHESANT Transformation:NA-Notes:NA-Variable type:categorical-Phenotype ID:ASTHMA_OPPORTUNIST_INFECTIONS	categorical.ASTHMA_OPPORTUNIST_INFECTIONS.txt	1741323351668EUR_vtg.txt.gz
0.1922	0.09567	2.009	0.04458	0.003552	0.001227	1.008	0.007336	-0.001714	0.005568	Diagnoses - main ICD10: J45 Asthma	361194	1693	359501	UK Biobank	https://docs.google.com/spreadsheets/d/1kvPoupSzsSFBNSztMzl04xMoSC3Kcx3CrjVf4yBmESU/edit?ts=5b5f17db#gid=227859291	PHESANT Transformation:NA-Notes:NA-Variable type:categorical-Phenotype ID:J45	categorical.J45.txt	1741323351668EUR_vtg.txt.gz
-0.07764	0.03867	-2.008	0.04465	0.07144	0.007487	1.076	0.02186	0.003967	0.007889	Blood clot, DVT, bronchitis, emphysema, asthma, rhinitis, eczema, allergy diagnosed by doctor: None of the above	360527	244522	116005	UK Biobank	https://docs.google.com/spreadsheets/d/1kvPoupSzsSFBNSztMzl04xMoSC3Kcx3CrjVf4yBmESU/edit?ts=5b5f17db#gid=227859291	PHESANT Transformation:6152_0 || CAT-MUL-BINARY-VAR 100 || NO_NAN Remove NA participants 181 || Removed 486 examples != 100 but with missing value (<0) || sample 116005/244522(360527) ||-Notes:ACE touchscreen question Has a doctor ever told you that you have had any of the following conditions? (You can select more than one answer) The following checks were performed: If code -7 was selected, the…	binary.6152_100.txt	1741323351668EUR_vtg.txt.gz
0.1691	0.08421	2.008	0.04468	0.05395	0.01773	0.9944	0.007266	-0.003549	0.004884	Leg pain when walking uphill or hurrying	24997	17250	7747	UK Biobank	https://docs.google.com/spreadsheets/d/1kvPoupSzsSFBNSztMzl04xMoSC3Kcx3CrjVf4yBmESU/edit?ts=5b5f17db#gid=227859291	PHESANT Transformation:5474_0|| CAT-SINGLE || Inc(>=10): 0(7747) || Inc(>=10): 1(17250) || CAT-SINGLE-BINARY || sample 7747/17250(24997) ||-Notes:ACE touchscreen question Do you get pain when you walk uphill or hurry? ~F5474~ was collected from participants who indicated that they get a pain in either leg on walking, as defined by their answers to ~F4728~-Variable type:binary	binary.5474.txt	1741323351668EUR_vtg.txt.gz
0.1267	0.06315	2.007	0.04475	0.008796	0.001863	1.096	0.009372	0.003061	0.006143	Diseases of white blood cells	424635	18630	406005	MVP	https://phenomics.va.ornl.gov/web/cipher/pheweb	https://www.science.org/doi/10.1126/science.adj1807	MVP_R4.1000G_AGR.Phe_288.EUR.GIA.dbGaP.txt.gz_ldsc	1741323351668EUR_vtg.txt.gz
0.1834	0.09145	2.006	0.04491	0.003251	0.001135	1.005	0.006471	0.002619	0.005514	Diagnoses - main ICD10: T81 Complications of procedures, not elsewhere classified	361194	5550	355644	UK Biobank	https://docs.google.com/spreadsheets/d/1kvPoupSzsSFBNSztMzl04xMoSC3Kcx3CrjVf4yBmESU/edit?ts=5b5f17db#gid=227859291	PHESANT Transformation:NA-Notes:NA-Variable type:categorical-Phenotype ID:T81	categorical.T81.txt	1741323351668EUR_vtg.txt.gz
0.311	0.1554	2.001	0.04534	0.001463	0.0009045	1.001	0.006588	-0.007198	0.005361	Myeloid leukemia	450986	1387	449599	MVP	https://phenomics.va.ornl.gov/web/cipher/pheweb	https://www.science.org/doi/10.1126/science.adj1637	MVP_R4.1000G_AGR.Phe_204_2.EUR.GIA.dbGaP.txt.gz_ldsc	1741323351668EUR_vtg.txt.gz
0.07366	0.03681	2.001	0.04539	0.05867	0.00415	1.046	0.01393	0.003326	0.007153	Nervous feelings	351829	83120	268709	UK Biobank	https://docs.google.com/spreadsheets/d/1kvPoupSzsSFBNSztMzl04xMoSC3Kcx3CrjVf4yBmESU/edit?ts=5b5f17db#gid=227859291	PHESANT Transformation:1970_0|| CAT-SINGLE || Inc(>=10): 0(268709) || Inc(>=10): 1(83120) || CAT-SINGLE-BINARY || sample 268709/83120(351829) ||-Notes:ACE touchscreen question Would you call yourself a nervous person? If the participant activated the Help button they were shown the message: Work through these questions quickly and do not think about the exact meaning of the question-Variable type…	binary.1970.txt	1741323351668EUR_vtg.txt.gz
-0.08428	0.04214	-2	0.0455	0.06244	0.004767	1.038	0.01096	-0.003172	0.006774	Medication for cholesterol, blood pressure, diabetes, or take exogenous hormones: None of the above	193148	133338	59810	UK Biobank	https://docs.google.com/spreadsheets/d/1kvPoupSzsSFBNSztMzl04xMoSC3Kcx3CrjVf4yBmESU/edit?ts=5b5f17db#gid=227859291	PHESANT Transformation:6153_0 || CAT-MUL-BINARY-VAR 100 || NO_NAN Remove NA participants 167294 || Removed 752 examples != 100 but with missing value (<0) || sample 59810/133338(193148) ||-Notes:ACE touchscreen question Do you regularly take any of the following medications? (You can select more than one answer) The following checks were performed: If code -7 was selected, then no additional choi…	binary.6153_100.txt	1741323351668EUR_vtg.txt.gz
0.08695	0.04348	2	0.04551	0.017	0.00162	1.083	0.009452	0.000232	0.005815	Other hypertrophic and atrophic conditions	399076	41322	357754	MVP (EUR)	https://ftp.ncbi.nlm.nih.gov/dbgap/studies/phs002453/analyses/GIA/	Phe_701. PheCodes_Dermatological System	MVP_R4.1000G_AGR.Phe_701.EUR.GIA.dbGaP.txt.gz.ctg	1741323351668EUR_vtg.txt.gz
0.08843	0.04426	1.998	0.0457	0.02129	0.00178	1.116	0.01017	-0.006027	0.006475	Extrapyramidal disease and abnormal movement disorders	436411	22799	413612	MVP	https://phenomics.va.ornl.gov/web/cipher/pheweb	https://www.science.org/doi/10.1126/science.adj1898	MVP_R4.1000G_AGR.Phe_333.EUR.GIA.dbGaP.txt.gz_ldsc	1741323351668EUR_vtg.txt.gz
0.08697	0.04353	1.998	0.04573	0.017	0.001621	1.083	0.009459	0.0002348	0.005816	Other hypertrophic and atrophic conditions	399076	41322	357754	MVP	https://phenomics.va.ornl.gov/web/cipher/pheweb	https://www.science.org/doi/10.1126/science.adj2569	MVP_R4.1000G_AGR.Phe_701.EUR.GIA.dbGaP.txt.gz_ldsc	1741323351668EUR_vtg.txt.gz
0.1997	0.1	1.997	0.04583	0.00309	0.001361	0.9936	0.007774	-0.0067	0.005128	Non-cancer illness code, self-reported: head injury	361141	1230	359911	UK Biobank	https://docs.google.com/spreadsheets/d/1kvPoupSzsSFBNSztMzl04xMoSC3Kcx3CrjVf4yBmESU/edit?ts=5b5f17db#gid=227859291	PHESANT Transformation:20002_0 || CAT-MUL-BINARY-VAR 1266 || Indicator name x135_0_0 || Remove indicator var NAs: 53 || Remove indicator var <0: 0 || Removed 0 examples != 1266 but with missing value (<0) || sample 359911/1230(361141) ||-Notes:Code for non-cancer illness. If the participant was uncertain of the type of illness they had had, then they described it to the interviewer (a trained nur…	binary.20002_1266.txt	1741323351668EUR_vtg.txt.gz
0.1622	0.08124	1.996	0.04591	0.01883	0.00508	1.002	0.007536	-0.004317	0.005569	Ever stopped smoking for 6+ months	87937	37903	50034	UK Biobank	https://docs.google.com/spreadsheets/d/1kvPoupSzsSFBNSztMzl04xMoSC3Kcx3CrjVf4yBmESU/edit?ts=5b5f17db#gid=227859291	PHESANT Transformation:2907_0|| CAT-SINGLE || Inc(>=10): 1(37903) || Inc(>=10): 0(50034) || CAT-SINGLE-BINARY || sample 50034/37903(87937) ||-Notes:ACE touchscreen question In the time that you smoked, did you ever stop for more than 6 months? ~F2907~ was collected from participants who indicated that in the past they smoked tobacco on most or all days, as defined by their answers to ~F1249~-Vari…	binary.2907.txt	1741323351668EUR_vtg.txt.gz
-0.179	0.08984	-1.993	0.04629	0.003179	0.001238	1.009	0.007622	0.0247	0.004826	Non-cancer illness code, self-reported: stroke	361141	4836	356305	UK Biobank	https://docs.google.com/spreadsheets/d/1kvPoupSzsSFBNSztMzl04xMoSC3Kcx3CrjVf4yBmESU/edit?ts=5b5f17db#gid=227859291	PHESANT Transformation:20002_0 || CAT-MUL-BINARY-VAR 1081 || Indicator name x135_0_0 || Remove indicator var NAs: 53 || Remove indicator var <0: 0 || Removed 0 examples != 1081 but with missing value (<0) || sample 356305/4836(361141) ||-Notes:Code for non-cancer illness. If the participant was uncertain of the type of illness they had had, then they described it to the interviewer (a trained nur…	binary.20002_1081.txt	1741323351668EUR_vtg.txt.gz
-0.2179	0.1095	-1.99	0.04661	0.01129	0.005353	0.9931	0.007818	0.005622	0.005924	Job SOC coding: Occupational therapists	91149	299	90850	UK Biobank	https://docs.google.com/spreadsheets/d/1kvPoupSzsSFBNSztMzl04xMoSC3Kcx3CrjVf4yBmESU/edit?ts=5b5f17db#gid=227859291	PHESANT Transformation:22617_0 || CAT-MUL-BINARY-VAR 3222 || NO_NAN Remove NA participants 270045 || Removed 0 examples != 3222 but with missing value (<0) || sample 90850/299(91149) ||-Notes:Each self-coded job group was mapped to a 4-digit SOC2003 coding. In some cases several self-coded job groups map to the same SOC2003 coding as the input interface was designed to help untrained users classi…	binary.22617_3222.txt	1741323351668EUR_vtg.txt.gz
-0.07298	0.03677	-1.985	0.04719	0.1563	0.008067	1.066	0.01146	-0.002538	0.006615	Age at first live birth	131987	NA	NA	UK Biobank	https://docs.google.com/spreadsheets/d/1kvPoupSzsSFBNSztMzl04xMoSC3Kcx3CrjVf4yBmESU/edit?ts=5b5f17db#gid=227859291	PHESANT Transformation:2754_0|| INTEGER || reassignments: -4=NA|-3=NA || CONTINUOUS || ||-Notes:ACE touchscreen question How old were you when you had your FIRST child? The following checks were performed: If answer If answer > 65 then rejected If answer > Participants age then rejected If answer If answer If answer > 48 then participant asked to confirm If answer > Age when periods stopped then …	2754_raw.txt	1741323351668EUR_vtg.txt.gz
-0.1589	0.08009	-1.984	0.04721	0.003552	0.001252	1.008	0.007448	0.02425	0.004897	Vascular/heart problems diagnosed by doctor: Stroke	360420	5587	354833	UK Biobank	https://docs.google.com/spreadsheets/d/1kvPoupSzsSFBNSztMzl04xMoSC3Kcx3CrjVf4yBmESU/edit?ts=5b5f17db#gid=227859291	PHESANT Transformation:6150_0 || CAT-MUL-BINARY-VAR 3 || NO_NAN Remove NA participants 180 || Removed 594 examples != 3 but with missing value (<0) || sample 354833/5587(360420) || SKIP_val:-3 < 0 ||-Notes:ACE touchscreen question Has a doctor ever told you that you have had any of the following conditions? (You can select more than one answer) The following checks were performed: If code -7 was …	binary.6150_3.txt	1741323351668EUR_vtg.txt.gz
0.1172	0.05908	1.984	0.04729	0.009823	0.001419	1.014	0.008195	-0.00312	0.005621	Medication for pain relief, constipation, heartburn: Laxatives (e.g. Dulcolax, Senokot)	357084	10307	346777	UK Biobank	https://docs.google.com/spreadsheets/d/1kvPoupSzsSFBNSztMzl04xMoSC3Kcx3CrjVf4yBmESU/edit?ts=5b5f17db#gid=227859291	PHESANT Transformation:6154_0 || CAT-MUL-BINARY-VAR 6 || NO_NAN Remove NA participants 514 || Removed 3596 examples != 6 but with missing value (<0) || sample 346777/10307(357084) || SKIP_val:-1 < 0 || SKIP_val:-3 < 0 ||-Notes:ACE touchscreen question Do you regularly take any of the following? (You can select more than one answer) The following checks were performed: If code -7 was selected, the…	binary.6154_6.txt	1741323351668EUR_vtg.txt.gz
0.1691	0.08539	1.98	0.0477	0.004035	0.001349	1.051	0.01206	-0.005069	0.006296	Lymphoid leukemia, chronic	450932	2845	448087	MVP	https://phenomics.va.ornl.gov/web/cipher/pheweb	https://www.science.org/doi/10.1126/science.adj1636	MVP_R4.1000G_AGR.Phe_204_12.EUR.GIA.dbGaP.txt.gz_ldsc	1741323351668EUR_vtg.txt.gz
0.169	0.08539	1.979	0.04783	0.004031	0.001348	1.051	0.01206	-0.005049	0.006286	Lymphoid leukemia, chronic	450932	2845	448087	MVP (EUR)	https://ftp.ncbi.nlm.nih.gov/dbgap/studies/phs002453/analyses/GIA/	Phe_204_12. PheCodes_Neoplasms	MVP_R4.1000G_AGR.Phe_204_12.EUR.GIA.dbGaP.txt.gz.ctg	1741323351668EUR_vtg.txt.gz
0.06528	0.033	1.978	0.0479	0.02426	0.002091	1.125	0.02426	0.007972	0.007311	Asthma (EUR Biobanks)	1376071	121940	1254131	Global Biobank Meta-analysis Initiative Meta-analysis Initiative: powering genetic discovery across human diseases. 2026	https://www.globalbiobankmeta.org/resources	https://www.sciencedirect.com/science/article/pii/S2666979X22001410?via%3Dihub	Asthma_Bothsex_eur_inv_var_meta_GBMI_052021_nbbkgt1.txt.gz.ctgvl	1741323351668EUR_vtg.txt.gz
-0.1247	0.06313	-1.975	0.04826	0.0439	0.005965	1.012	0.007651	0.005674	0.006241	Why stopped smoking: Health precaution	88516	55663	32853	UK Biobank	https://docs.google.com/spreadsheets/d/1kvPoupSzsSFBNSztMzl04xMoSC3Kcx3CrjVf4yBmESU/edit?ts=5b5f17db#gid=227859291	PHESANT Transformation:6157_0 || CAT-MUL-BINARY-VAR 3 || NO_NAN Remove NA participants 271928 || Removed 750 examples != 3 but with missing value (<0) || sample 32853/55663(88516) ||-Notes:ACE touchscreen question Why did you stop smoking? (You can select more than one answer) The following checks were performed: If code -7 was selected, then no additional choices were allowed. If code -1 was sel…	binary.6157_3.txt	1741323351668EUR_vtg.txt.gz
0.1623	0.08229	1.972	0.04861	0.003883	0.001072	1.014	0.007634	-0.005392	0.006112	Open wound of toe(s)	446168	2168	444000	MVP	https://phenomics.va.ornl.gov/web/cipher/pheweb	https://www.science.org/doi/10.1126/science.adj2792	MVP_R4.1000G_AGR.Phe_871_4.EUR.GIA.dbGaP.txt.gz_ldsc	1741323351668EUR_vtg.txt.gz
0.1188	0.06047	1.965	0.04938	0.02162	0.003479	1.019	0.007917	-0.002667	0.006062	Had major operations	165737	106506	59231	UK Biobank	https://docs.google.com/spreadsheets/d/1kvPoupSzsSFBNSztMzl04xMoSC3Kcx3CrjVf4yBmESU/edit?ts=5b5f17db#gid=227859291	PHESANT Transformation:2415_0|| CAT-SINGLE || Inc(>=10): 1(106506) || Inc(>=10): 0(59231) || CAT-SINGLE-BINARY || sample 59231/106506(165737) ||-Notes:ACE touchscreen question Have you had any major operations? (For example, operations that required an overnight stay in hospital) If the participant activated the Help button they were shown the message: If you are unsure if you have had a 'major' …	binary.2415.txt	1741323351668EUR_vtg.txt.gz
-0.09132	0.04648	-1.965	0.04944	0.0265	0.00304	1.03	0.008104	-0.007089	0.005524	Transport type for commuting to job workplace: Cycle	190832	14885	175947	UK Biobank	https://docs.google.com/spreadsheets/d/1kvPoupSzsSFBNSztMzl04xMoSC3Kcx3CrjVf4yBmESU/edit?ts=5b5f17db#gid=227859291	PHESANT Transformation:6143_0 || CAT-MUL-BINARY-VAR 4 || NO_NAN Remove NA participants 170220 || Removed 142 examples != 4 but with missing value (<0) || sample 175947/14885(190832) ||-Notes:ACE touchscreen question What types of transport do you use to get to and from work? (You can select more than one answer) The following checks were performed: If code -7 was selected, then no additional choi…	binary.6143_4.txt	1741323351668EUR_vtg.txt.gz
0.1215	0.06184	1.964	0.04952	0.006931	0.001188	1.037	0.007954	-0.003595	0.006202	Acute pharyngitis	415901	14147	401754	MVP	https://phenomics.va.ornl.gov/web/cipher/pheweb	https://www.science.org/doi/10.1126/science.adj2194	MVP_R4.1000G_AGR.Phe_465_2.EUR.GIA.dbGaP.txt.gz_ldsc	1741323351668EUR_vtg.txt.gz
0.09413	0.048	1.961	0.04986	0.01603	0.002651	1.121	0.02569	-0.007877	0.006268	Chronic liver disease and cirrhosis	431959	30744	401215	MVP	https://phenomics.va.ornl.gov/web/cipher/pheweb	https://www.science.org/doi/10.1126/science.adj2369	MVP_R4.1000G_AGR.Phe_571.EUR.GIA.dbGaP.txt.gz_ldsc	1741323351668EUR_vtg.txt.gz
0.06355	0.03241	1.961	0.04988	0.07991	0.004302	1.31	0.01695	0.008567	0.008691	Chronic airway obstruction	418504	103054	315450	MVP	https://phenomics.va.ornl.gov/web/cipher/pheweb	https://www.science.org/doi/10.1126/science.adj2224	MVP_R4.1000G_AGR.Phe_496.EUR.GIA.dbGaP.txt.gz_ldsc	1741323351668EUR_vtg.txt.gz
0.1948	0.0994
0.107	0.05467
-0.07234	0.03699
0.1173	0.06013
-0.165	0.08458
0.05238	0.02686
-0.09438	0.04844
0.09277	0.04763
-0.2483	0.1275
-0.1924	0.09898
0.1836	0.09452
0.1472	0.07591
0.1314	0.06782
0.1371	0.07089
-0.1548	0.08009
-0.2257	0.117
0.1674	0.08685
-0.08593	0.04463
0.1477	0.07693
0.06195	0.03227
0.08979	0.04678
0.1859	0.09689
0.0917	0.04783
0.08104	0.04227
0.05696	0.02972
0.1556	0.08122
0.1256	0.06594
0.1019	0.05353
0.1992	0.1046
0.08155	0.0429
0.2198	0.1157
0.1598	0.0841
0.4012	0.2112
0.2198	0.1158
0.1435	0.07569
0.07676	0.04051
0.06928	0.03666
0.09238	0.0489
0.107	0.05663
0.09156	0.04853
-0.09991	0.05301
-0.1445	0.07673
-0.1168	0.06206
0.09203	0.04893
0.09993	0.05319
0.06836	0.03642
0.1018	0.05435
0.08203	0.0438
0.08212	0.04387
0.05515	0.02948
-0.2652	0.142
0.09499	0.05088
0.14	0.07504
0.1289	0.06917
0.1327	0.07132
0.09035	0.04856
-0.06266	0.03368
0.1815	0.09763
0.1002	0.05394
0.06768	0.03646
0.0902	0.04861
-0.14	0.07548
0.09711	0.05246
0.06331	0.0342
0.06867	0.0371
0.1305	0.07055
-0.05426	0.02935
0.1156	0.06255
0.07595	0.04109
-0.07162	0.03879
0.1255	0.06808
0.1027	0.0557
0.0998	0.05414
0.09545	0.05179
0.06102	0.03314
0.07814	0.04246
-0.08578	0.04662
0.1473	0.08009
-0.2261	0.1229
0.09105	0.04952
0.09587	0.0522
0.06007	0.03272
0.2231	0.1216
0.08279	0.04513
0.09731	0.05312
-0.115	0.06282
0.08656	0.04728
0.2488	0.136
-0.06168	0.03372
0.1148	0.06284
0.09483	0.0519
-0.05396	0.02955
-0.2199	0.1206
0.1219	0.06686
0.4813	0.2642
0.1811	0.0994
-0.05078	0.02798
-0.1046	0.05776
0.1454	0.08029
0.06019	0.03325
0.2474	0.1367
0.2142	0.1185
0.2046	0.1132
-0.1673	0.09264
0.07056	0.03908
0.2431	0.1353
0.1426	0.07948
0.0886	0.04938
0.2001	0.1116
-0.07804	0.04358
0.4696	0.2625
0.06714	0.03754
0.4694	0.2626
0.06811	0.03813
0.07129	0.03992
0.1988	0.1114
0.1263	0.07084
0.06565	0.03683
-0.05944	0.03338
0.1609	0.09038
0.08262	0.04646
0.1274	0.07163
0.1072	0.06043
0.1706	0.0962
0.1706	0.0962
0.189	0.1068
-0.1911	0.1081
0.2179	0.1234
0.08427	0.04772
0.1354	0.07666
0.2182	0.1236
-0.05386	0.03053
0.07321	0.04151
0.2235	0.1269
0.1657	0.09409
0.0648	0.03684
0.0675	0.0384
-0.09255	0.05267
0.08565	0.04874
0.1089	0.06206
0.1087	0.06193
0.08964	0.05107
0.0666	0.03796
0.09968	0.05682
0.0872	0.04975
0.04588	0.02621
0.09159	0.05239
0.1073	0.06144
0.2184	0.1251
-0.2281	0.1308
0.1847	0.1059
0.05539	0.03178
-0.1139	0.06536
0.06183	0.03552
0.1352	0.07771
0.06221	0.03582
0.1266	0.07301
0.1266	0.07307
0.1419	0.08196
0.1282	0.07406
0.2149	0.1242
-0.06457	0.03733
0.142	0.08213
0.128	0.0741
0.09176	0.05314
0.1226	0.07102
0.07205	0.04178
0.0724	0.04198
0.06258	0.03635
0.1278	0.07424
0.3621	0.2107
0.1276	0.07429
0.1752	0.102
0.06158	0.03591
-0.05355	0.03124
-0.05361	0.0313
0.09135	0.05333
-0.09107	0.05317
0.06468	0.03778
0.06466	0.03778
0.3632	0.2123
-0.0506	0.02958
0.1297	0.07583
0.1727	0.1013
0.1193	0.07
-0.1023	0.06018
0.04445	0.02614
0.1116	0.06572
0.06603	0.03899
0.05194	0.03069
-0.07651	0.04523
-0.1215	0.07194
0.08758	0.05189
0.1066	0.06336
0.08792	0.05241
0.1438	0.08577
-0.1389	0.08289
0.09005	0.05381
-0.1729	0.1034
0.2601	0.1556
-0.06907	0.04132
-0.1028	0.06149
0.08206	0.04914
0.07565	0.04535
-0.2266	0.1359
0.1469	0.08814
0.137	0.08221
0.0759	0.04556
0.2247	0.1351
-0.09052	0.05444
0.09798	0.05893
0.05383	0.03238
0.09359	0.05634
0.09359	0.05634
0.06216	0.03743
0.1611	0.09716
0.1193	0.07207
0.09279	0.05614
0.08172	0.04946
0.06682	0.04049
0.1019	0.06174
-0.07917	0.04803
0.0618	0.03755
0.1179	0.07171
-0.06276	0.03833
0.1179	0.07203
0.06581	0.0402
0.06599	0.04036
0.06587	0.04031
0.1709	0.1046
-0.07367	0.04515
0.2717	0.1667
0.1571	0.09645
0.06414	0.03938
0.2719	0.167
0.09163	0.05628
0.1389	0.08542
0.1217	0.07499
0.2096	0.1291
0.1383	0.08525
0.2091	0.1289
0.06157	0.03801
0.08605	0.05313
0.07434	0.04589
0.1781	0.11
-0.1157	0.07158
0.11	0.06807
0.05929	0.0367
-0.05377	0.03335
0.2175	0.1349
-0.2001	0.1243
-0.07229	0.04499
0.06106	0.03801
0.09799	0.06102
0.1039	0.06472
0.1027	0.06401
0.1402	0.08745
0.09851	0.06146
0.09331	0.05824
0.1058	0.06606
0.09922	0.06194
0.159	0.09935
0.03736	0.02337
0.1735	0.1085
0.06868	0.043
0.07243	0.0454
0.2365	0.1487
0.08467	0.05325
0.08505	0.05356
-0.249	0.1569
0.06876	0.04333
0.06106	0.03852
0.2055	0.1297
-0.181	0.1144
-0.2419	0.1529
0.1585	0.1003
-0.04732	0.02997
0.1598	0.1014
0.04075	0.02587
0.1587	0.1009
0.1021	0.06493
0.09668	0.06161
0.04723	0.03015
0.1251	0.08019
0.215	0.138
0.1481	0.09508
-0.1836	0.1181
0.1452	0.09348
0.1452	0.09348
0.07403	0.0477
0.1006	0.06481
-0.1136	0.07332
0.1847	0.1193
-0.08604	0.05564
0.04755	0.0308
0.05439	0.03524
0.08047	0.05229
0.1147	0.07461
0.1145	0.07454
0.0401	0.02611
0.07548	0.04915
0.1641	0.1069
0.1382	0.09002
0.1374	0.08951
0.03938	0.02568
0.1563	0.1021
0.1559	0.102
0.09164	0.06003
0.1209	0.07931
0.1039	0.06822
0.1136	0.07464
-0.0505	0.03331
-0.1153	0.07606
-0.1153	0.07606
0.07812	0.05155
-0.08666	0.05723
0.07138	0.04719
0.06845	0.04529
0.1339	0.08862
0.1467	0.09721
-0.09946	0.06606
0.06886	0.04575
-0.1903	0.1264
-0.1529	0.1016
0.09008	0.05988
0.09054	0.06019
0.05786	0.03849
-0.1279	0.08514
-0.1479	0.09847
-0.2228	0.1484
-0.07549	0.05037
-0.1213	0.081
0.1608	0.1074
0.2674	0.1787
0.2679	0.179
-0.0847	0.05663
0.1072	0.07168
0.08258	0.05525
0.1096	0.0733
0.1027	0.06872
-0.08014	0.05371
0.1622	0.1089
0.162	0.1087
0.08719	0.05865
0.1033	0.06949
0.1433	0.09641
0.1274	0.08585
0.1428	0.09624
0.0873	0.05886
0.1078	0.07275
0.1095	0.07392
0.12	0.08104
0.08446	0.0571
-0.1635	0.1106
-0.05459	0.03693
0.1574	0.1065
0.04824	0.03268
-0.06227	0.0422
0.1543	0.1048
0.05941	0.04037
0.04179	0.02839
0.07322	0.04976
-0.05855	0.03981
0.1446	0.09844
0.05091	0.03466
0.04898	0.0334
0.05651	0.03854
0.2222	0.1516
-0.12	0.08183
-0.07766	0.05304
-0.0716	0.04893
0.0707	0.04833
-0.05907	0.04041
-0.1375	0.09407
-0.1362	0.09337
0.06402	0.04392
0.07207	0.04948
0.1171	0.08046
0.09213	0.06328
0.1057	0.07262
0.06464	0.04453
0.04703	0.0324
-0.05083	0.03505
0.08901	0.06139
0.08381	0.05782
-0.03382	0.02339
-0.1049	0.07263
-0.1638	0.1135
0.1294	0.08971
0.0691	0.0479
-0.1367	0.09481
0.08848	0.06143
0.09869	0.06854
0.1619	0.1124
0.1617	0.1124
0.0884	0.06148
0.0763	0.05314
-0.04897	0.03418
0.09837	0.06866
0.1291	0.09016
0.1346	0.09405
0.1136	0.07942
0.05329	0.03726
0.08897	0.06223
0.1293	0.09044
0.2002	0.1403
0.05059	0.03546
0.05934	0.04162
-0.04873	0.03417
0.2142	0.1503
0.04777	0.03353
0.1265	0.08896
0.08769	0.06168
0.1109	0.07815
-0.05344	0.03767
0.06408	0.04517
-0.1667	0.1178
0.1061	0.07505
0.06273	0.04437
0.08968	0.06349
0.08974	0.06357
0.1617	0.1146
-0.07903	0.05603
0.1617	0.1147
0.06052	0.04292
0.1576	0.1118
0.06233	0.04426
0.08921	0.06341
0.1679	0.1193
0.07909	0.05624
-0.05609	0.03989
-0.04926	0.03505
0.1409	0.1004
-0.1522	0.1085
0.1539	0.1097
0.2289	0.1633
0.03956	0.02825
0.04775	0.03411
0.04779	0.03414
0.08565	0.06129
0.1295	0.0929
0.06332	0.04544
0.09977	0.07168
0.0875	0.06294
0.2792	0.2008
-0.131	0.09431
-0.1202	0.08658
-0.1202	0.08658
0.05362	0.03862
0.08904	0.06426
0.1183	0.08556
-0.09745	0.07053
-0.0952	0.06895
0.1188	0.08602
0.2028	0.1469
0.1238	0.08967
0.06383	0.04627
0.1273	0.09233
0.09117	0.06615
-0.05277	0.03835
-0.1818	0.1322
0.05248	0.03818
0.06678	0.04866
-0.1456	0.1061
0.07575	0.05521
-0.04848	0.03536
0.04603	0.03357
0.04976	0.0364
0.1221	0.08942
0.03893	0.02851
-0.05077	0.03718
0.1385	0.1016
-0.1012	0.0743
0.1194	0.08778
0.2152	0.1586
-0.07011	0.05172
0.2151	0.1588
0.1203	0.08884
0.1203	0.08884
0.05007	0.037
0.1028	0.07604
0.09032	0.06687
0.1469	0.1088
-0.05991	0.04439
0.0452	0.03354
0.09016	0.06697
0.0791	0.05879
0.06852	0.05093
0.088	0.06544
0.09644	0.07171
0.1369	0.1019
0.1199	0.08929
-0.04692	0.03496
-0.1122	0.08372
0.1365	0.1019
0.06807	0.05082
0.05078	0.03796
0.06085	0.04553
-0.1336	0.09998
-0.03578	0.0268
0.174	0.1303
-0.0445	0.03333
0.07621	0.05712
0.07621	0.05712
0.1742	0.1305
0.09993	0.07496
0.1924	0.1444
-0.1569	0.1179
0.1019	0.07661
0.05696	0.04286
0.1141	0.08586
0.07936	0.05991
0.1797	0.1357
0.1339	0.1011
0.1869	0.1413
-0.0467	0.03537
0.04157	0.03149
0.1218	0.09226
0.1224	0.09273
0.1225	0.09286
0.05512	0.04181
0.0746	0.05672
0.06033	0.04587
0.1817	0.1382
0.0856	0.0651
-0.05873	0.04468
0.1045	0.07949
0.1166	0.08873
0.08567	0.0652
-0.1692	0.1291
0.05403	0.04121
0.04203	0.03211
0.04653	0.03557
0.1704	0.1303
0.1094	0.08368
0.1017	0.07781
0.1129	0.08643
0.1332	0.1024
0.1076	0.08307
0.04219	0.03262
-0.09982	0.0772
0.03708	0.02871
-0.04503	0.0349
0.09214	0.07147
0.1527	0.1185
0.0419	0.03251
-0.04243	0.03296
-0.1304	0.1014
-0.03984	0.03097
-0.09187	0.07145
0.09403	0.07319
-0.1189	0.09263
0.07684	0.05985
-0.03624	0.02828
0.09517	0.07435
0.08526	0.06663
0.1017	0.07953
0.1017	0.07953
0.1017	0.07953
-0.1264	0.09893
-0.04268	0.0334
0.1252	0.09794
0.05486	0.04293
0.05434	0.04254
0.0788	0.06177
0.05409	0.04243
-0.1129	0.08859
0.1208	0.09511
0.1272	0.1002
-0.05626	0.04435
-0.09424	0.07434
-0.03178	0.02507
0.0643	0.05072
0.07251	0.05721
0.09728	0.07682
0.1308	0.1033
0.06763	0.05345
0.1128	0.08913
0.04398	0.03476
0.06418	0.05077
0.121	0.09573
0.09697	0.07687
-0.09135	0.07244
0.1643	0.1305
-0.156	0.1241
-0.06572	0.05228
0.1099	0.08741
0.05475	0.04361
-0.03897	0.03106
0.08124	0.06476
0.05026	0.04005
-0.03896	0.03106
0.06134	0.04891
0.05596	0.04465
0.1185	0.09482
-0.1118	0.08952
-0.04714	0.03777
0.08134	0.06519
0.06551	0.05251
0.1269	0.1018
-0.09118	0.07314
0.1096	0.08798
0.0547	0.04391
0.09431	0.07575
0.07772	0.06252
-0.154	0.124
0.1555	0.1253
0.06007	0.04856
0.04149	0.03357
0.05993	0.04855
0.2472	0.2003
0.1033	0.08374
0.1234	0.1002
0.09739	0.07913
0.0856	0.06958
0.1002	0.08149
-0.04751	0.03863
0.0856	0.06964
0.119	0.09701
0.08131	0.06631
0.09116	0.0746
0.05386	0.04411
0.0672	0.05511
0.04721	0.03875
0.1373	0.1128
-0.04058	0.0334
-0.05769	0.04749
0.06015	0.04952
0.1994	0.1643
0.02845	0.02346
0.0768	0.06338
0.06021	0.0497
-0.08743	0.07219
-0.04082	0.03372
0.05357	0.04426
0.1286	0.1063
0.0602	0.04979
0.04846	0.04012
0.1219	0.1009
0.0711	0.05891
-0.03595	0.02989
-0.04472	0.03739
0.1191	0.09959
0.1021	0.0854
0.05708	0.04788
0.1101	0.09246
0.07189	0.06039
0.05867	0.04928
-0.05762	0.04841
0.1083	0.091
0.1083	0.091
-0.07984	0.0671
-0.1074	0.09045
-0.07493	0.06319
-0.04186	0.03532
0.1233	0.1041
0.1542	0.1305
0.08526	0.07217
0.09813	0.08307
0.1718	0.1456
0.1979	0.1678
-0.07803	0.06624
0.1018	0.08648
0.1005	0.08546
0.07441	0.06347
0.043	0.03672
0.1156	0.09875
0.08736	0.07461
0.2043	0.1746
0.03584	0.03064
-0.11	0.09408
0.08726	0.07464
0.1169	0.09999
0.06987	0.0599
0.05173	0.04436
0.1151	0.09871
-0.09095	0.07802
0.1457	0.125
0.1497	0.1284
0.1357	0.1166
0.06423	0.05521
0.1063	0.09147
0.09564	0.0823
0.09543	0.08211
0.101	0.08689
0.07338	0.06318
0.04169	0.03593
0.1047	0.09025
-0.03634	0.03135
0.05974	0.05157
0.1252	0.1082
0.07072	0.06115
0.02805	0.02426
0.09826	0.085
0.07058	0.06115
0.0304	0.02635
0.08815	0.07658
-0.09776	0.08504
-0.03797	0.03304
0.08437	0.07361
0.03234	0.02823
0.04557	0.03977
0.1079	0.09422
-0.1529	0.1336
0.1018	0.08895
0.1923	0.1681
0.07291	0.06377
0.09769	0.08549
0.03768	0.03298
-0.04304	0.03774
0.08124	0.07127
0.09096	0.07981
0.09102	0.07989
0.09909	0.08703
-0.1731	0.152
0.04603	0.04055
-0.05232	0.04612
0.09241	0.08151
-0.1134	0.1002
-0.1001	0.08856
-0.1026	0.09083
0.1094	0.09691
0.1217	0.1081
0.06026	0.05351
-0.06361	0.0565
0.06559	0.05869
-0.03284	0.0294
0.03357	0.03006
-0.09562	0.08565
-0.1071	0.09606
-0.07682	0.06894
-0.04704	0.04226
0.03087	0.02775
-0.0977	0.0879
0.05676	0.05126
0.09276	0.0838
-0.03528	0.0319
0.09875	0.08937
0.0417	0.03777
0.0596	0.05402
0.03872	0.0351
0.09845	0.08934
0.0376	0.03414
0.1328	0.1206
0.04167	0.03784
-0.04059	0.03693
0.1375	0.1251
0.126	0.1147
0.0724	0.06595
0.05679	0.05176
0.04267	0.03889
0.1156	0.1054
-0.08078	0.07372
0.03744	0.03421
0.03147	0.02876
0.05364	0.04916
0.05365	0.04918
-0.05528	0.0507
0.05059	0.0464
0.08737	0.08018
-0.04861	0.04468
0.04005	0.03685
0.07746	0.07135
0.3258	0.3005
0.1092	0.1008
0.09798	0.09044
0.07615	0.07044
0.05844	0.05408
0.2027	0.1877
0.03122	0.02901
0.1105	0.1027
-0.03835	0.03566
-0.09346	0.08698
-0.02526	0.02356
-0.06684	0.06238
0.1182	0.1104
0.09718	0.09105
-0.1134	0.1063
0.08662	0.08116
0.1336	0.1252
-0.1007	0.09459
-0.03229	0.03039
-0.03445	0.03248
0.0559	0.05274
-0.05813	0.05486
0.05362	0.05061
0.09377	0.08852
0.09377	0.08852
-0.08645	0.08176
-0.05098	0.04828
0.0473	0.04479
0.1466	0.1389
0.05316	0.05047
0.1363	0.1295
-0.09052	0.08601
-0.0301	0.0286
0.06833	0.06501
0.1256	0.1197
0.04118	0.03926
0.1256	0.1198
0.05125	0.04892
0.09144	0.08728
0.3411	0.3257
0.06646	0.06345
0.05987	0.05722
0.04884	0.04669
0.07076	0.06768
0.1078	0.1031
0.1078	0.1031
0.03617	0.0347
0.04867	0.04669
-0.06352	0.061
0.09831	0.09462
0.09536	0.09198
0.1161	0.1121
0.1113	0.1075
0.06366	0.06153
0.0834	0.08071
-0.08473	0.0821
0.08084	0.07832
0.0864	0.08371
-0.07123	0.06919
0.04549	0.04422
0.02305	0.02241
0.1126	0.1096
-0.06397	0.06229
0.09122	0.08885
0.1174	0.1144
0.1087	0.1059
-0.02886	0.02814
0.04526	0.04419
-0.03578	0.03494
0.09322	0.09113
0.07046	0.06888
0.1089	0.1065
0.06815	0.06674
0.06814	0.06672
0.1115	0.1092
0.07718	0.07567
0.05327	0.05228
0.1111	0.1091
0.1005	0.09882
0.0518	0.05097
0.07068	0.06958
0.06471	0.06375
0.08659	0.08538
0.03742	0.03698
0.1017	0.1007
0.1047	0.1036
0.1049	0.1039
0.0866	0.08581
-0.09314	0.09231
0.0872	0.08654
0.06792	0.06748
0.1109	0.1102
0.08702	0.08652
0.04081	0.0406
-0.07007	0.06971
0.3574	0.3561
-0.04233	0.04217
0.05813	0.05796
-0.1088	0.1085
-0.1711	0.1708
0.1144	0.1144
0.099	0.09914
0.1033	0.1034
0.09198	0.09223
0.08887	0.08927
-0.1039	0.1044
0.09679	0.09738
0.09944	0.1001
0.103	0.1039
0.08568	0.08659
0.1083	0.1097
0.03627	0.03672
0.0956	0.09689
-0.09226	0.09356
0.09025	0.09158
0.09039	0.09177
-0.09197	0.09353
0.1176	0.1197
0.09529	0.097
0.03512	0.03578
0.07034	0.07166
-0.09357	0.09535
0.07604	0.07761
-0.09678	0.09905
0.06376	0.0653
0.08706	0.08922
0.08375	0.08594
0.08375	0.08597
-0.0752	0.07723
0.0636	0.0654
0.05111	0.05255
0.0866	0.08926
0.08141	0.08397
-0.1484	0.1532
-0.03	0.03097
0.03172	0.03279
-0.1094	0.1132
0.09317	0.0964
-0.1153	0.1194
-0.06716	0.06964
0.09165	0.09523
0.09163	0.0952
-0.09531	0.09904
0.03529	0.03666
-0.03234	0.03363
0.02983	0.03103
-0.08825	0.09198
-0.08825	0.09198
0.08372	0.0873
0.05909	0.06164
0.05377	0.05608
0.07953	0.08296
0.06687	0.06978
0.08596	0.08982
0.02972	0.03107
0.04266	0.04459
-0.07176	0.07505
0.03662	0.03843
0.1459	0.1533
-0.03607	0.03793
0.07614	0.08011
0.1096	0.1155
0.07057	0.07437
0.1554	0.1638
0.06161	0.06496
0.04784	0.05052
0.04784	0.05052
0.06611	0.06985
-0.03508	0.03706
-0.09079	0.09614
0.03846	0.04077
-0.02933	0.03112
-0.02933	0.03112
-0.07791	0.08268
0.08471	0.0899
-0.03784	0.04019
-0.1221	0.1297
-0.02455	0.02611
0.07756	0.08256
-0.02977	0.03168
0.08756	0.09323
-0.0382	0.04077
-0.07693	0.08217
-0.1072	0.1147
0.02901	0.03105
0.03993	0.04279
0.03994	0.04284
0.07301	0.07833
0.1624	0.1744
0.08525	0.09155
0.08517	0.09151
0.03171	0.03408
-0.1272	0.1368
-0.04929	0.05297
0.09235	0.09928
0.08989	0.09664
-0.02853	0.03069
0.03614	0.03888
0.08732	0.09431
-0.03557	0.03844
-0.08571	0.09264
0.04091	0.04425
0.07468	0.08081
0.07162	0.07769
0.06845	0.07429
-0.1055	0.1146
0.09613	0.1044
0.04894	0.05325
0.1131	0.1232
-0.0445	0.04856
0.08431	0.09201
-0.04451	0.04862
-0.07858	0.08595
0.06384	0.07014
-0.1273	0.1398
-0.0415	0.04563
-0.08556	0.09419
0.07967	0.08777
-0.02636	0.02904
0.03804	0.04196
0.04787	0.05283
-0.07221	0.07979
0.04267	0.04724
-0.05472	0.0606
0.09112	0.101
0.09712	0.1077
0.2539	0.2815
0.1046	0.116
0.05141	0.05707
0.03367	0.03737
0.09547	0.1062
0.09296	0.1034
-0.05855	0.06513
0.05438	0.06051
0.08747	0.09738
-0.06393	0.07118
-0.03632	0.04045
0.06006	0.06691
0.07958	0.08863
0.09291	0.1035
0.07019	0.07823
0.06789	0.07579
0.1045	0.117
0.03945	0.04418
-0.1557	0.1744
0.06214	0.06966
0.06205	0.06963
0.06651	0.07468
-0.02923	0.03295
0.0926	0.1045
0.04372	0.04939
0.05711	0.06468
-0.08508	0.0967
-0.1995	0.2272
0.1009	0.1151
0.05162	0.05889
0.04305	0.04911
0.05196	0.0593
-0.05134	0.05859
0.05234	0.05975
0.07902	0.09043
0.07695	0.08821
0.09443	0.1083
0.07463	0.08565
0.04213	0.04843
-0.05388	0.06202
0.101	0.1166
0.0912	0.1053
0.03151	0.0364
-0.1086	0.1254
-0.05544	0.0642
-0.06565	0.07603
-0.04106	0.0476
-0.05104	0.05918
0.1597	0.1853
-0.07507	0.08708
0.05591	0.06487
0.07281	0.08455
-0.05097	0.05921
0.0397	0.04612
-0.06304	0.07324
-0.06503	0.07558
0.07796	0.09067
-0.05588	0.06504
-0.05503	0.06405
0.02139	0.02493
-0.06169	0.07194
0.05117	0.05969
0.06708	0.07845
0.06794	0.07945
0.06375	0.07465
0.03978	0.04659
0.07201	0.08437
0.03943	0.04624
0.09905	0.1162
0.08051	0.09454
0.03593	0.04222
0.13	0.1531
-0.03851	0.04541
-0.03851	0.04541
0.07733	0.09127
0.02959	0.03503
-0.0722	0.08545
-0.06475	0.07674
0.07502	0.08893
-0.03761	0.04463
0.04465	0.053
0.09739	0.1157
0.02597	0.03091
0.05198	0.06195
0.1011	0.1205
0.02641	0.03151
0.04132	0.04934
0.02549	0.03045
-0.09441	0.1129
-0.05835	0.06986
0.1102	0.132
-0.02674	0.03214
-0.02975	0.03579
-0.09777	0.1177
0.1073	0.1298
-0.1079	0.1308
0.08736	0.1063
0.07308	0.08894
0.07523	0.09156
-0.1075	0.1308
0.1085	0.1322
0.06611	0.0806
-0.09873	0.1206
0.1114	0.136
0.07359	0.08994
-0.1053	0.1288
0.08544	0.1045
0.04633	0.05672
0.03078	0.03775
0.02108	0.02585
0.04787	0.05873
0.08054	0.09943
-0.0948	0.117
-0.03954	0.04889
0.08791	0.1088
0.02991	0.03703
0.07349	0.09121
0.01893	0.02355
0.03043	0.03796
-0.0262	0.03268
0.07645	0.09566
0.02593	0.03246
-0.05478	0.06858
0.07313	0.09166
-0.1452	0.1824
0.03115	0.03923
-0.03366	0.0424
0.06899	0.08703
-0.07986	0.1011
0.02086	0.02647
-0.07802	0.09905
0.03518	0.04477
-0.07289	0.09277
-0.07289	0.09277
0.07934	0.1011
0.07356	0.09371
0.05448	0.06942
0.06665	0.08507
0.04086	0.05225
0.04417	0.05658
0.04334	0.05552
0.03224	0.04133
-0.08076	0.1035
0.05133	0.06591
0.05211	0.06699
-0.01968	0.02532
0.01453	0.01872
-0.02321	0.03001
-0.03514	0.04552
-0.02985	0.03869
0.06132	0.07946
0.06132	0.07946
-0.05691	0.07377
-0.02265	0.02939
0.07161	0.09299
0.1028	0.1334
0.109	0.1417
0.07531	0.09798
0.04539	0.05911
0.02483	0.03233
0.07537	0.09821
-0.04006	0.05222
-0.0775	0.101
0.1033	0.1354
-0.08245	0.1081
-0.08245	0.1081
0.08297	0.1088
-0.1474	0.1934
-0.02289	0.03006
0.06307	0.08283
0.0247	0.03251
0.08696	0.1145
0.09545	0.1257
-0.06756	0.08904
0.04741	0.06253
0.077	0.1018
0.09533	0.1261
-0.01914	0.02532
-0.02608	0.03452
-0.07162	0.0948
-0.01852	0.02459
-0.03358	0.0447
-0.1028	0.1371
0.05613	0.07485
0.02682	0.03578
0.05812	0.07754
-0.01898	0.02538
0.07881	0.1055
0.07521	0.1007
0.07365	0.09865
0.1114	0.1494
0.08646	0.1159
0.03459	0.04639
0.06405	0.08591
0.05409	0.07258
-0.0183	0.02459
0.06033	0.08116
-0.0366	0.04928
-0.02015	0.02715
0.0982	0.1324
0.02584	0.03485
0.09116	0.123
0.06409	0.08659
-0.02696	0.03652
-0.02635	0.03574
0.07743	0.1051
0.04314	0.05858
0.04314	0.05858
0.06954	0.09458
0.03067	0.04175
-0.07955	0.1086
0.06921	0.09461
-0.01806	0.02474
0.0525	0.07191
0.03849	0.05281
0.05443	0.07471
-0.05258	0.0724
-0.04155	0.05724
-0.0249	0.03436
0.07288	0.1006
-0.02537	0.03509
0.08226	0.1138
0.03404	0.04718
0.02233	0.03096
0.03353	0.04653
0.05332	0.07415
-0.0219	0.03047
-0.03216	0.04475
0.02295	0.032
-0.01937	0.02705
0.04744	0.06631
0.06996	0.09786
0.05096	0.0713
-0.02806	0.03932
0.05133	0.07196
0.1026	0.1441
0.03664	0.05152
-0.01981	0.02786
0.05682	0.07993
-0.0382	0.05376
-0.09278	0.1311
0.04799	0.06797
-0.0651	0.09228
-0.06194	0.0878
0.03248	0.04609
-0.02488	0.03534
-0.01793	0.02549
0.03473	0.04944
0.05707	0.0815
0.07118	0.102
-0.02859	0.04096
0.06003	0.08605
0.08087	0.116
0.02532	0.0364
0.03877	0.0558
0.06498	0.09357
0.05839	0.08426
0.04744	0.06849
0.05027	0.07258
0.02705	0.0391
0.02542	0.03679
-0.03961	0.05736
0.03144	0.04552
0.05005	0.07254
-0.01854	0.0269
0.03321	0.0482
-0.07372	0.107
0.02808	0.04075
0.07636	0.1109
0.04255	0.06185
0.07651	0.1113
-0.01875	0.02731
0.02341	0.03413
-0.01744	0.02548
0.03886	0.05708
-0.03783	0.05561
-0.03126	0.04594
-0.02334	0.03436
-0.05111	0.07535
0.08407	0.124
0.0594	0.08765
0.152	0.2245
-0.04641	0.06866
0.02134	0.03159
0.2001	0.2963
-0.02386	0.03534
-0.05153	0.07634
0.03262	0.04835
0.07796	0.1157
0.02056	0.03054
0.02648	0.03934
-0.01811	0.0269
-0.05281	0.07855
0.02277	0.0339
0.05329	0.0794
0.02881	0.04293
-0.0183	0.02728
0.06969	0.1039
0.07663	0.1143
0.05207	0.07765
0.02079	0.0311
0.05343	0.08016
0.03564	0.05348
-0.02249	0.03387
-0.08505	0.1281
0.04777	0.07211
0.03145	0.0476
0.05988	0.09067
-0.04553	0.06901
0.05546	0.08415
0.07582	0.1152
0.03511	0.05369
0.03444	0.05268
0.02297	0.03516
0.06058	0.09273
-0.02436	0.0373
0.08025	0.1229
0.05678	0.08703
0.0483	0.0741
-0.01785	0.0274
-0.02296	0.03523
-0.02888	0.04434
0.06587	0.1014
0.1066	0.1646
0.06563	0.1014
0.1751	0.2707
-0.1017	0.1576
0.04031	0.06266
0.06826	0.1063
0.0233	0.03631
0.02899	0.04523
-0.07482	0.1167
0.06458	0.1008
0.03814	0.05957
0.02179	0.03405
-0.02085	0.03262
-0.02015	0.03153
-0.03473	0.05474
0.02965	0.04685
0.02999	0.04748
0.02999	0.04748
-0.01809	0.02867
0.07951	0.126
0.06349	0.1009
0.05861	0.0932
0.05109	0.08137
-0.01958	0.0312
0.01957	0.03123
0.06044	0.09667
-0.01879	0.0301
-0.1545	0.2478
0.06835	0.1097
0.0227	0.03645
0.06668	0.1072
0.07129	0.1147
-0.01779	0.02866
0.02878	0.04638
-0.02188	0.03528
-0.0697	0.1124
0.02918	0.04708
-0.04418	0.07131
-0.07923	0.1279
-0.03555	0.05747
0.03772	0.06099
0.02246	0.03637
0.02248	0.03642
0.04296	0.06984
-0.04306	0.0701
0.05913	0.09632
0.02388	0.03899
-0.01966	0.03212
0.02004	0.03282
-0.06705	0.1098
-0.04728	0.0775
-0.0465	0.07636
-0.07609	0.125
-0.06835	0.1123
0.05178	0.0852
0.02179	0.03591
0.04577	0.07583
-0.03738	0.06201
-0.02247	0.03727
0.02433	0.04036
-0.04898	0.08132
0.02849	0.04731
0.04816	0.08035
0.05365	0.08959
0.04543	0.07589
0.02049	0.03426
-0.02461	0.04115
0.04967	0.08324
0.05743	0.09653
0.03981	0.06729
-0.02541	0.04299
0.01663	0.02815
0.06059	0.1028
-0.04188	0.07107
0.0441	0.07485
-0.07608	0.1294
0.04872	0.08294
0.03899	0.06648
0.03791	0.06469
0.05789	0.0988
0.05931	0.1013
-0.01852	0.03166
-0.05273	0.09059
[truncated: 873 more rows]

## Sheet: Table S8
Table S8: OmicsPred analysis findings
OMICSPRED_ID	Gene/metabolite/protein	P	CO_mean	CA_mean	nSNP_in_GWAS	nSNP_in_model	Internal_R2	Internal_Rho	Cohort	Protein/Sub_pathway/Group
OPGS007394	AL662844.4	0	3.35624	2.93677	33	39	0.136	0.365	RNAseq
OPGS009198	TRAV12-1	0	0.697969	0.572381	165	229	0.085	0.294	RNAseq
OPGS010211	TRBV27	0	0.874399	0.812258	2	6	0.066	0.219	RNAseq
OPGS012006	VARS2	0	0.0613868	0.126516	12	19	0.041	0.192	RNAseq
OPGS012271	TRBV5-6	0	1.23553	1.3372	5	6	0.038	0.161	RNAseq
OPGS012984	POU5F1	0	2.33147	2.22233	14	15	0.031	0.062	RNAseq
OPGS013298	IL7R	0	-1.10475	-1.16653	6	8	0.028	0.144	RNAseq
OPGS013383	PPP1R11	0	-0.138735	-0.0963148	1	3	0.027	0.141	RNAseq
OPGS013437	TRAV29DV5	0	-0.35384	-0.411243	13	24	0.027	0.144	RNAseq
OPGS015779	N4BP3	0	-0.140581	-0.175761	1	2	0.012	0.092	RNAseq
OPGS016253	KCNG1	0	0.116672	0.0720838	1	1	0.01	0.079	RNAseq
OPGS016422	PPP1R18	0	-0.102438	-0.0606587	1	1	0.009	0.083	RNAseq
OPGS000082	MICA	0	1.11	0.761925	1037	1367	0.401	0.643	Somalogic	MHC class I polypeptide-related sequence A
OPGS000147	FTMT	0	-0.653871	-0.454967	1326	1815	0.288	0.495	Somalogic	Ferritin, mitochondrial
OPGS000569	PDE4D	0	0.0160731	0.124894	526	734	0.103	0.309	Somalogic	cAMP-specific 3',5'-cyclic phosphodiesterase 4D
OPGS013225	REG4	5.40032e-296	-0.258758	-0.197035	50	63	0.029	0.156	RNAseq
OPGS002441	TEK	1.16927e-294	-0.296969	-0.462752	96	110	0.181	0.398	Olink	Angiopoietin-1 receptor
OPGS001067	ISG15	6.85347e-289	0.0752857	-0.00900831	32	38	0.048	0.208	Somalogic	Ubiquitin-like protein ISG15
OPGS000175	KIR2DS2	4.94321e-286	-0.137828	-0.234083	324	534	0.256	0.513	Somalogic	Killer cell immunoglobulin-like receptor 2DS2
OPGS013514	GZMK	3.89136e-261	-0.438719	-0.385033	20	26	0.026	0.156	RNAseq
OPGS007089	HLA-A	2.77049e-256	-8.28487	-8.10454	18	21	0.148	0.383	RNAseq
OPGS000878	B2M	1.31407e-251	0.222954	0.152519	315	428	0.065	0.24	Somalogic	Beta-2-microglobulin
OPGS012636	KIR2DL3	4.84664e-248	0.0836661	0.105576	4	13	0.034	0.165	RNAseq
OPGS010041	GPRC5B	2.35546e-241	-0.238872	-0.197406	9	17	0.069	0.205	RNAseq
OPGS010693	TRBV5-1	1.23242e-238	0.777858	0.705531	148	193	0.058	0.231	RNAseq
OPGS015052	CISH	1.01779e-236	0.296129	0.322971	20	27	0.015	0.11	RNAseq
OPGS007138	HCG27	2.61464e-236	-4.18669	-4.04232	23	28	0.146	0.374	RNAseq
OPGS002560	DDR1	2.25918e-225	-0.185065	-0.250341	28	33	0.048	0.207	Olink	Epithelial discoidin domain-containing receptor 1
OPGS005519	AL645933.3	3.56439e-225	10.8849	10.674	38	49	0.236	0.47	RNAseq
OPGS008889	TRAV20	1.35562e-219	-1.65127	-1.55	71	88	0.092	0.316	RNAseq
OPGS000538	CREB3L4	2.53476e-219	-0.808753	-0.913783	184	234	0.109	0.288	Somalogic	Cyclic AMP-responsive element-binding protein 3-like protein 4
OPGS015948	CLUH	6.58221e-218	-0.265003	-0.299402	2	2	0.011	0.09	RNAseq
OPGS007675	TRAV12-2	3.0355e-216	0.147145	0.0424062	170	222	0.126	0.359	RNAseq
OPGS013958	CSNK2B	7.48514e-215	0.701887	0.641141	6	6	0.023	0.138	RNAseq
OPGS009711	TRAV21	2.20051e-213	-0.301536	-0.401953	65	82	0.075	0.277	RNAseq
OPGS009962	CCHCR1	2.35648e-207	0.662189	0.581907	18	27	0.07	0.239	RNAseq
OPGS016360	IL2RB	1.56525e-193	0.179025	0.203848	1	1	0.009	0.077	RNAseq
OPGS011626	ABCF1	1.53798e-192	-2.47797	-2.42831	14	18	0.046	0.143	RNAseq
OPGS013748	KLRB1	1.10418e-191	0.0870629	0.0331593	12	12	0.024	0.144	RNAseq
OPGS016761	ATP6V1G2	6.48004e-187	-0.534717	-0.490776	1	1	0.008	0.087	RNAseq
OPGS003680	RNF5P1	2.40197e-183	0.203018	0.024857	1467	1862	0.611	0.714	RNAseq
OPGS007764	HLA-E	3.70665e-183	-0.000344045	-0.0840503	101	138	0.123	0.347	RNAseq
OPGS000572	GRIA4	3.69824e-177	0.0900866	0.162462	540	751	0.102	0.302	Somalogic	Glutamate receptor 4
OPGS016606	TTC22	6.80156e-175	0.386941	0.347756	1	1	0.008	0.083	RNAseq
OPGS016488	PRRT1	1.14277e-174	0.2014	0.170084	1	1	0.009	0.086	RNAseq
OPGS000290	C4A|C4B	1.21002e-166	-0.547605	-0.426667	616	813	0.171	0.402	Somalogic	Complement C4
OPGS000137	C4A|C4B	4.51676e-160	0.834459	0.694983	575	795	0.312	0.549	Somalogic	Complement C4b
OPGS011776	LST1	4.50788e-158	0.166944	0.242649	15	16	0.044	0.196	RNAseq
OPGS012093	TRIM26	1.15492e-154	-0.211713	-0.252884	16	24	0.04	0.193	RNAseq
OPGS014232	TRAV1-2	1.72286e-151	-0.389798	-0.427538	36	44	0.021	0.141	RNAseq
OPGS002598	IL10	1.60796e-147	0.0429201	0.101168	8	9	0.031	0.146	Olink	Interleukin-10
OPGS004567	HLA-C	5.96429e-143	-2.78748	-2.98942	95	118	0.343	0.577	RNAseq
OPGS001550	TFF3	1.27378e-142	-0.290527	-0.321849	22	30	0.024	0.131	Somalogic	Trefoil factor 3
OPGS000783	IL36A	7.55217e-141	0.329139	0.393826	283	383	0.075	0.251	Somalogic	Interleukin-36 alpha
OPGS014580	DACT1	1.57274e-136	0.395623	0.423905	20	22	0.018	0.12	RNAseq
OPGS011010	TRBV5-4	3.12366e-133	1.36745	1.31058	24	30	0.054	0.221	RNAseq
OPGS000690	RACGAP1	5.09465e-129	0.321677	0.273105	342	458	0.086	0.285	Somalogic	Rac GTPase-activating protein 1
OPGS014059	BCL2	3.36864e-126	0.441445	0.475459	4	4	0.022	0.113	RNAseq
OPGS008274	NCR3	3.546e-126	9.26336	9.1535	30	36	0.107	0.26	RNAseq
OPGS001302	IGHD|IGK|IGL	3.65384e-122	0.0406792	0.0712097	56	78	0.033	0.168	Somalogic	Immunoglobulin D
OPGS010492	HCG18	4.15972e-121	-0.65157	-0.709499	12	16	0.061	0.169	RNAseq
OPGS006716	IER3	8.96576e-120	2.30164	2.18826	24	37	0.164	0.408	RNAseq
OPGS015393	TRBV25-1	5.68513e-115	0.132214	0.112373	3	6	0.014	0.111	RNAseq
OPGS011288	AC104809.2	1.286e-111	0.821587	0.764485	12	12	0.05	0.216	RNAseq
OPGS011784	TUBB	7.79879e-111	2.03379	1.99436	8	10	0.044	0.139	RNAseq
OPGS015030	PRRC2A	4.61206e-108	-0.0547252	-0.0428588	1	2	0.016	0.117	RNAseq
OPGS004334	HLA-G	1.40942e-106	-6.63476	-6.45456	40	52	0.383	0.593	RNAseq
OPGS013699	TRAV5	1.75267e-100	-0.213266	-0.189313	28	41	0.025	0.15	RNAseq
OPGS002632	AGER	8.83977e-99	-0.267137	-0.232121	12	13	0.022	0.141	Olink	Advanced glycosylation end product-specific receptor
OPGS002643	NBL1	4.52746e-97	-0.192871	-0.218236	9	12	0.018	0.119	Olink	Neuroblastoma suppressor of tumorigenicity 1
OPGS000879	NCR3	2.94196e-95	0.595444	0.541733	31	45	0.065	0.22	Somalogic	Natural cytotoxicity triggering receptor 3
OPGS011671	MICA	7.48427e-95	-3.23034	-3.29396	6	7	0.045	0.2	RNAseq
OPGS007730	CKB	2.67337e-94	2.20573	2.12221	23	24	0.124	0.346	RNAseq
OPGS016277	TRAV22	7.79945e-94	-0.251634	-0.264391	1	1	0.009	0.082	RNAseq
OPGS001595	TXNDC15	2.10707e-91	-0.0542469	-0.0670671	15	21	0.022	0.153	Somalogic	Thioredoxin domain-containing protein 15
OPGS009077	DDAH2	3.42923e-89	1.97755	1.90704	41	47	0.088	0.28	RNAseq
OPGS002103	TFF3	3.87537e-82	-0.045631	-0.0631883	3	3	0.012	0.115	Somalogic	Trefoil factor 3
OPGS016039	TRBV12-3	7.9575e-81	-0.213756	-0.190586	3	3	0.01	0.099	RNAseq
OPGS005167	TCF19	1.75896e-80	-6.27892	-6.37778	81	99	0.269	0.392	RNAseq
OPGS000920	CD96	3.8508e-79	0.280028	0.31962	279	395	0.061	0.241	Somalogic	T-cell surface protein tactile
OPGS010826	TRIM10	9.42589e-74	0.441708	0.483625	30	42	0.056	0.217	RNAseq
OPGS007248	STK19P	2.82476e-73	-9.09109	-8.9984	29	36	0.141	0.309	RNAseq
OPGS013959	TMEM131	3.09327e-72	-1.48908	-1.5224	3	3	0.023	0.15	RNAseq
OPGS009222	HCG4	2.56181e-69	0.924864	0.983694	5	5	0.085	0.29	RNAseq
OPGS000402	HLA-DQA2	2.60233e-68	0.279371	0.335134	473	663	0.138	0.384	Somalogic	HLA class II histocompatibility antigen, DQ alpha 2 chain
OPGS008402	TNXB	6.46556e-67	-3.30587	-3.23352	37	47	0.104	0.323	RNAseq
OPGS011482	TRAV8-4	1.22263e-66	1.55793	1.51222	7	7	0.047	0.21	RNAseq
OPGS015392	DXO	1.87316e-64	0.373053	0.347594	3	3	0.014	0.079	RNAseq
OPGS001454	PTH2	2.07113e-64	0.0297556	0.0520608	47	70	0.027	0.165	Somalogic	Tuberoinfundibular peptide of 39 residues
OPGS013201	NRCAM	1.90643e-63	-0.782963	-0.751298	5	5	0.029	0.16	RNAseq
OPGS007711	HMOX1	2.88314e-62	1.86964	1.94272	17	21	0.125	0.329	RNAseq
OPGS013780	ZSCAN16	3.29625e-62	-0.309644	-0.329092	9	11	0.024	0.15	RNAseq
OPGS000576	IL21	5.50199e-62	0.88261	0.83579	236	332	0.102	0.3	Somalogic	Interleukin-21
OPGS009764	AIF1	1.41131e-61	3.74167	3.67888	9	9	0.074	0.244	RNAseq
OPGS003620	ZFP57	1.18142e-60	-0.958471	-1.07232	248	326	0.668	0.82	RNAseq
OPGS011344	MICE	2.28124e-60	-1.6754	-1.62632	10	10	0.049	0.211	RNAseq
OPGS015558	C6orf136	7.44575e-60	-0.679819	-0.697323	6	6	0.013	0.071	RNAseq
OPGS000069	LILRB1	9.85845e-60	1.16394	1.04824	86	134	0.437	0.553	Somalogic	Leukocyte immunoglobulin-like receptor subfamily B member 1
OPGS014283	MXRA8	1.9737e-59	-0.407184	-0.423801	23	32	0.021	0.143	RNAseq
OPGS015796	GJC2	2.19561e-58	-0.162225	-0.147097	6	6	0.011	0.109	RNAseq
OPGS007866	TSHZ2	9.61437e-56	-0.840147	-0.775879	25	25	0.119	0.33	RNAseq
OPGS008281	HLA-F-AS1	2.89361e-54	4.09026	4.14298	20	25	0.107	0.285	RNAseq
OPGS015170	TRAV6	1.55885e-53	-0.0730313	-0.0553198	6	7	0.015	0.112	RNAseq
OPGS001102	GZMA	7.20908e-52	0.0556521	0.0843638	111	161	0.046	0.214	Somalogic	Granzyme A
OPGS002246	SPAG11B	3.59644e-51	-0.103769	-0.123266	1	1	0.01	0.092	Somalogic	Sperm-associated antigen 11B
OPGS011025	MDC1	3.83114e-51	-2.91361	-2.94708	72	82	0.053	0.093	RNAseq
OPGS011585	CD8B	5.63539e-51	0.301093	0.336965	21	25	0.046	0.201	RNAseq
OPGS010926	CACNA2D4	1.01619e-50	0.561086	0.601703	38	50	0.055	0.203	RNAseq
OPGS000046	ERAP1	1.16271e-50	-0.89665	-0.77268	165	192	0.516	0.717	Somalogic	Endoplasmic reticulum aminopeptidase 1
OPGS001231	BGLAP	2.6823e-50	-0.187659	-0.154185	15	19	0.037	0.193	Somalogic	Osteocalcin
OPGS010607	TRAV8-1	9.9623e-50	-0.343118	-0.373104	104	140	0.059	0.245	RNAseq
OPGS008383	CD160	5.38114e-49	0.598891	0.652675	21	23	0.104	0.322	RNAseq
OPGS001416	NSF	1.08858e-47	0.0269449	0.0511906	51	64	0.029	0.169	Somalogic	Vesicle-fusing ATPase
OPGS002070	CXCL2|CXCL3	1.41839e-47	-0.0971986	-0.10897	3	6	0.012	0.108	Somalogic	Gro-beta/gamma
OPGS001679	TIMP1	2.16782e-47	0.00408695	-0.0171504	2	2	0.02	0.123	Somalogic	Metalloproteinase inhibitor 1
OPGS007018	TRBV10-3	3.10768e-47	0.865088	0.915743	213	252	0.151	0.387	RNAseq
OPGS007407	TRBV2	1.7402e-45	-0.744064	-0.788317	216	279	0.135	0.369	RNAseq
OPGS013045	NEU1	2.77116e-45	0.0277529	0.0525219	18	19	0.03	0.174	RNAseq
OPGS005334	AL645933.4	9.39925e-44	-2.42909	-2.37112	21	32	0.253	0.494	RNAseq
OPGS011265	HSPA5	1.36673e-43	0.359702	0.399665	15	16	0.05	0.199	RNAseq
OPGS003642	ERAP1	3.60986e-43	-6.23856	-6.11088	75	102	0.644	0.804	RNAseq
OPGS002581	CX3CL1	2.18091e-41	-0.549179	-0.577499	33	34	0.038	0.181	Olink	Fractalkine
OPGS012123	SLFN13	3.74851e-41	2.12479	2.15365	4	5	0.04	0.15	RNAseq
OPGS010475	ZNRD1	3.42474e-40	1.98693	2.01178	8	13	0.061	0.206	RNAseq
OPGS002422	LTA	5.47428e-39	-0.916125	-0.987829	396	519	0.223	0.359	Olink	Lymphotoxin-alpha
OPGS012171	TRBV15	6.15927e-39	0.49274	0.475678	20	29	0.039	0.189	RNAseq
OPGS001603	ZHX3	1.94117e-37	-0.0492551	-0.0596024	10	14	0.022	0.147	Somalogic	Zinc fingers and homeoboxes protein 3
OPGS014075	AGER	6.39451e-37	-0.17898	-0.197185	2	3	0.022	0.126	RNAseq
OPGS001693	ATF6	7.37258e-37	-0.092138	-0.111356	7	8	0.02	0.14	Somalogic	Cyclic AMP-dependent transcription factor ATF-6 alpha
OPGS013013	FOXJ1	4.0538e-36	0.650639	0.670648	8	10	0.031	0.15	RNAseq
OPGS011853	TRBV6-1	4.6043e-36	-0.431746	-0.405548	12	15	0.043	0.194	RNAseq
OPGS001701	UAP1	5.63635e-36	-0.0780713	-0.091323	4	7	0.019	0.138	Somalogic	UDP-N-acetylhexosamine pyrophosphorylase
OPGS011948	ADGRG1	1.02056e-35	0.427566	0.400431	12	15	0.042	0.197	RNAseq
OPGS008094	SCART1	3.7721e-35	-4.23582	-4.28043	35	38	0.113	0.294	RNAseq
OPGS010965	H4C12	4.51797e-35	-1.4292	-1.40458	9	15	0.054	0.157	RNAseq
OPGS016441	PPT2	6.95385e-35	0.386292	0.371347	1	1	0.009	0.085	RNAseq
OPGS010929	EOMES	2.40214e-34	-0.818503	-0.787995	32	38	0.055	0.223	RNAseq
OPGS000765	TEK	5.16137e-34	-0.813311	-0.856931	21	26	0.077	0.255	Somalogic	Angiopoietin-1 receptor, soluble
OPGS004406	HLA-H	6.04881e-34	-5.38278	-5.32066	29	35	0.369	0.584	RNAseq
OPGS001860	IGHE|IGK|IGL	1.28684e-33	-0.0510775	-0.0604386	3	4	0.016	0.118	Somalogic	Immunoglobulin E
OPGS011431	VWA7	1.90774e-33	0.939067	0.91354	15	20	0.048	0.2	RNAseq
OPGS002466	SLAMF7	9.81118e-33	0.189423	0.243129	53	57	0.143	0.349	Olink	SLAM family member 7
OPGS001281	PAXIP1	1.80623e-31	0.0184225	0.0356128	24	31	0.035	0.188	Somalogic	PAX-interacting protein 1
OPGS005245	ZNF391	2.0022e-31	5.7654	5.69211	56	57	0.261	0.489	RNAseq
OPGS006866	AL662795.2	5.65943e-31	4.27808	4.23524	66	80	0.157	0.38	RNAseq
OPGS015883	ZNF184	1.96348e-30	0.12268	0.134365	1	1	0.011	0.098	RNAseq
OPGS014496	VARS1	5.5964e-30	-0.170256	-0.175599	1	2	0.019	0.121	RNAseq
OPGS001966	DNAJC10	1.24647e-29	-0.20135	-0.212272	1	2	0.013	0.114	Somalogic	DnaJ homolog subfamily C member 10
OPGS010348	TRBV6-5	1.35725e-29	-0.568789	-0.597026	56	67	0.063	0.251	RNAseq
OPGS010212	PSMB9	3.12618e-29	-3.38799	-3.3535	12	13	0.066	0.246	RNAseq
OPGS010017	ZNF192P1	9.05003e-29	-2.48457	-2.51767	23	25	0.069	0.235	RNAseq
OPGS005918	DDR1	3.04226e-28	-12.6052	-12.549	67	74	0.208	0.431	RNAseq
OPGS002511	CD4	2.7877e-27	-0.382308	-0.41027	81	113	0.083	0.287	Olink	T-cell surface glycoprotein CD4
OPGS006940	HLA-W	4.7134e-25	-3.35188	-3.31905	5	8	0.154	0.345	RNAseq
OPGS001911	EDA	5.07341e-25	0.047061	0.0592116	2	2	0.014	0.118	Somalogic	Ectodysplasin-A, secreted form
OPGS005168	IFITM4P	9.00364e-25	-14.6936	-14.6305	52	61	0.269	0.536	RNAseq
OPGS003973	B3GNT2	1.41106e-24	-0.0421364	-0.118657	85	92	0.474	0.675	RNAseq
OPGS001598	SPARC	5.27073e-24	-0.243383	-0.26403	7	7	0.022	0.147	Somalogic	SPARC
OPGS011005	SLC1A5	9.63678e-24	-0.00669077	-0.024881	8	12	0.054	0.206	RNAseq
OPGS014443	ABCB1	1.78264e-23	-0.541648	-0.528885	9	10	0.019	0.126	RNAseq
OPGS004065	HLA-V	9.42975e-23	-13.7338	-13.6616	117	144	0.446	0.561	RNAseq
OPGS011716	FBLN7	1.93263e-22	1.09349	1.11436	9	12	0.045	0.207	RNAseq
OPGS007297	GPANK1	5.91238e-22	-3.5964	-3.56348	17	20	0.14	0.306	RNAseq
OPGS013305	TRBV14	6.21802e-22	1.14988	1.131	12	15	0.028	0.168	RNAseq
OPGS012304	PBX2	1.26862e-21	0.553156	0.575161	5	5	0.038	0.188	RNAseq
OPGS011283	CD248	1.90536e-21	-0.4141	-0.39645	208	269	0.05	0.223	RNAseq
OPGS007384	HLA-B	9.95265e-21	6.88783	6.84964	27	31	0.137	0.36	RNAseq
OPGS011512	NRM	1.03815e-20	-4.73825	-4.69788	5	5	0.047	0.075	RNAseq
OPGS001200	DNAJB11	2.05583e-20	0.0515985	0.0328126	25	30	0.039	0.175	Somalogic	DnaJ homolog subfamily B member 11
OPGS000905	TOR1AIP1	1.4538e-19	0.466748	0.435029	73	99	0.063	0.254	Somalogic	Torsin-1A-interacting protein 1
OPGS014985	PDLIM7	1.46399e-19	0.236259	0.223625	2	2	0.016	0.11	RNAseq
OPGS010561	IL2RA	1.51499e-19	-0.557494	-0.533741	33	39	0.06	0.24	RNAseq
OPGS001037	GALNT1	6.65986e-19	-0.283363	-0.301958	25	34	0.051	0.224	Somalogic	Polypeptide N-acetylgalactosaminyltransferase 1
OPGS011787	C2	1.0969e-18	-0.48148	-0.45808	16	20	0.044	0.189	RNAseq
OPGS011674	PRSS23	1.55922e-18	0.0715646	0.0506739	11	12	0.045	0.202	RNAseq
OPGS009490	AC005840.2	1.89387e-18	0.283339	0.266015	3	11	0.079	0.215	RNAseq
OPGS012698	SNHG32	2.21443e-18	-1.61934	-1.64009	8	9	0.034	0.15	RNAseq
OPGS005230	LINC00243	2.75388e-18	9.46248	9.41505	49	54	0.263	0.507	RNAseq
OPGS009810	ZNF204P	2.92629e-18	1.07991	1.04957	17	17	0.073	0.206	RNAseq
OPGS000984	C2	3.28228e-18	0.0667852	0.0479995	150	217	0.055	0.176	Somalogic	Complement C2
OPGS000618	MICB	3.88334e-18	-0.733518	-0.713074	489	649	0.096	0.293	Somalogic	MHC class I polypeptide-related sequence B
OPGS006499	C4A	4.64742e-18	0.538375	0.572651	25	33	0.176	0.385	RNAseq
OPGS002568	GZMA	5.26062e-18	0.273906	0.286712	227	313	0.043	0.199	Olink	Granzyme A
OPGS001553	MPIG6B	6.87241e-18	0.618984	0.634539	5	5	0.024	0.147	Somalogic	Protein G6b
OPGS001761	SUMF2	8.84278e-18	0.787495	0.775004	3	3	0.018	0.114	Somalogic	Sulfatase-modifying factor 2
OPGS000240	MICB	1.23475e-17	-0.589669	-0.560993	803	1083	0.198	0.441	Somalogic	MHC class I polypeptide-related sequence B
OPGS003843	BTN3A2	1.5635e-17	4.83876	4.89392	89	104	0.532	0.674	RNAseq
OPGS011536	TRAV2	2.92295e-17	-0.478884	-0.498768	28	30	0.047	0.212	RNAseq
OPGS004112	HLA-F	3.95154e-17	-2.08747	-2.14921	103	119	0.433	0.661	RNAseq
OPGS002427	LRPAP1	4.3598e-17	-0.0897902	-0.122229	412	533	0.216	0.236	Olink	Alpha-2-macroglobulin receptor-associated protein
OPGS013924	HCG4P5	5.27201e-17	-1.50057	-1.48364	3	3	0.023	0.11	RNAseq
OPGS006693	HCP5	2.21906e-15	1.45943	1.42244	26	27	0.166	0.396	RNAseq
OPGS006648	TRBV11-3	3.37516e-15	-4.29099	-4.25043	23	27	0.168	0.3	RNAseq
OPGS002012	APOM	1.44319e-14	0.956185	0.965655	3	3	0.013	0.105	Somalogic	Apolipoprotein M
OPGS015752	TRAV13-1	1.93116e-14	-1.7386	-1.74686	3	3	0.012	0.068	RNAseq
OPGS007865	MAL	2.3033e-14	-0.0795309	-0.0519557	36	45	0.119	0.337	RNAseq
OPGS002672	BDNF	2.56865e-14	0.0689088	0.0782499	1	1	0.009	0.092	Olink	Brain-derived neurotrophic factor
OPGS009626	APBA2	3.06423e-14	-1.26863	-1.24345	14	15	0.076	0.251	RNAseq
OPGS012808	TRBV20-1	3.62993e-14	0.383194	0.369044	7	10	0.033	0.163	RNAseq
OPGS004144	PSORS1C3	4.40979e-14	-11.1062	-11.1657	91	114	0.424	0.615	RNAseq
OPGS001286	GZMK	4.52863e-14	-0.119189	-0.103476	17	25	0.034	0.173	Somalogic	Granzyme K
OPGS007194	GPR25	6.74922e-14	-0.533709	-0.561792	27	31	0.144	0.374	RNAseq
OPGS009300	TRAV26-1	7.71565e-14	2.51768	2.49709	19	25	0.083	0.281	RNAseq
OPGS006845	FLOT1	1.66256e-13	1.90328	1.93348	121	157	0.158	0.384	RNAseq
OPGS000156	LRPAP1	2.00181e-13	0.0389028	0.0707669	334	438	0.272	0.265	Somalogic	alpha-2-macroglobulin receptor-associated protein
OPGS012855	TRBV9	9.65423e-13	0.487629	0.498816	16	26	0.032	0.177	RNAseq
OPGS015394	APOM	9.65716e-13	0.265736	0.273166	6	7	0.014	0.114	RNAseq
OPGS001409	GREM1	2.44789e-12	-0.0500879	-0.0619919	6	8	0.029	0.136	Somalogic	Gremlin-1
OPGS010142	PRSS16	8.90445e-12	-2.13309	-2.15235	6	7	0.067	0.193	RNAseq
OPGS007691	HLA-DRB1	1.00336e-11	0.313588	0.343565	32	41	0.126	0.343	RNAseq
OPGS006248	MCCD1	1.04183e-11	-0.340228	-0.308176	18	24	0.189	0.437	RNAseq
OPGS000645	PRSS3	1.06649e-11	0.293125	0.276448	450	598	0.091	0.282	Somalogic	Trypsin-3
OPGS016159	PSME2	1.11375e-11	0.0845781	0.077041	3	3	0.01	0.092	RNAseq
OPGS010981	TM4SF19	1.74678e-11	0.335957	0.316987	11	12	0.054	0.228	RNAseq
OPGS008000	AL009179.2	4.95036e-11	-5.16169	-5.18635	36	39	0.116	0.147	RNAseq
OPGS006038	HLA-DQA2	1.09699e-10	-16.1556	-16.1041	25	29	0.201	0.433	RNAseq
OPGS010779	ACE	1.7919e-10	0.197646	0.214737	8	9	0.057	0.236	RNAseq
OPGS009841	PDGFRB	2.65448e-10	1.79345	1.81259	17	20	0.072	0.255	RNAseq
OPGS000517	AGER	2.76859e-10	-0.212824	-0.188922	74	86	0.114	0.323	Somalogic	Advanced glycosylation end product-specific receptor, soluble
OPGS014176	TRAV27	3.13381e-10	-1.18651	-1.17522	4	4	0.021	0.142	RNAseq
OPGS016208	AL162591.2	4.0687e-10	0.0935775	0.100037	1	1	0.01	0.089	RNAseq
OPGS011287	HCG4P3	6.88767e-10	-0.21251	-0.227257	5	6	0.05	0.188	RNAseq
OPGS015445	PCDH9	1.44705e-09	0.727284	0.718316	4	4	0.013	0.097	RNAseq
OPGS002613	IL6	1.5575e-09	0.203398	0.192975	3	3	0.027	0.154	Olink	Interleukin-6
OPGS002139	IL27|EBI3	1.61042e-09	0.16134	0.154102	1	1	0.011	0.11	Somalogic	Interleukin-27
OPGS002433	IL12A;IL12B	1.73428e-09	0.62662	0.595247	71	76	0.194	0.43	Olink	Interleukin-12 subunit alpha;beta
OPGS010874	ALS2CL	2.01643e-09	-0.573948	-0.591725	13	14	0.056	0.232	RNAseq
OPGS006434	BTN2A1	2.57807e-09	-5.11038	-5.08148	22	25	0.179	0.39	RNAseq
OPGS004191	CARD9	3.05552e-09	-0.914849	-0.868679	35	59	0.414	0.646	RNAseq
OPGS000501	GFRA2	3.14366e-09	-1.04678	-1.07134	18	21	0.117	0.341	Somalogic	GDNF family receptor alpha-2
OPGS016108	NTN4	3.51102e-09	0.204859	0.211148	1	1	0.01	0.098	RNAseq
OPGS014960	MYNN	3.51105e-09	-0.304539	-0.313888	1	1	0.016	0.117	RNAseq
OPGS002446	XCL1	3.90643e-09	0.106687	0.0760728	64	68	0.174	0.416	Olink	Lymphotactin
OPGS009218	EIF3CL	4.13021e-09	1.6519	1.66883	9	14	0.085	0.281	RNAseq
OPGS012717	GBP4	5.11073e-09	1.02004	1.0088	6	7	0.033	0.151	RNAseq
OPGS012128	TNFRSF21	7.99887e-09	0.41423	0.423485	10	23	0.04	0.196	RNAseq
OPGS000020	IL6R	1.17767e-08	0.253497	0.200616	111	123	0.609	0.78	Somalogic	Interleukin-6 receptor subunit alpha
OPGS007411	HOPX	1.23608e-08	0.991653	1.01763	18	19	0.135	0.351	RNAseq
OPGS005535	VMO1	1.924e-08	0.654322	0.686985	23	29	0.235	0.456	RNAseq
OPGS009371	TRBV19	3.04541e-08	-1.20501	-1.21597	89	109	0.082	0.279	RNAseq
OPGS000022	IL6R	3.92163e-08	0.169743	0.118882	111	123	0.602	0.778	Somalogic	Interleukin-6 receptor subunit alpha
OPGS004956	XXbac-BPG248L24.12	4.72476e-08	2.03474	2.06276	44	49	0.291	0.531	RNAseq
OPGS001615	CCM2	5.01354e-08	0.540551	0.5511	2	2	0.022	0.13	Somalogic	Cerebral cavernous malformations 2 protein
OPGS006283	SCAMP2	5.03336e-08	-0.876514	-0.847784	64	66	0.187	0.441	RNAseq
OPGS007240	HLA-U	5.61425e-08	-4.07399	-4.09618	12	14	0.142	0.331	RNAseq
OPGS006152	ITGB3	6.84722e-08	1.04082	1.07135	51	54	0.194	0.426	RNAseq
OPGS002387	IL6R	6.85431e-08	1.20726	1.1589	148	168	0.541	0.743	Olink	Interleukin-6 receptor subunit alpha
OPGS016212	ALG2	7.13974e-08	-0.0468245	-0.0521584	1	1	0.01	0.084	RNAseq
OPGS007937	TNFRSF1A	8.19599e-08	1.11686	1.14033	7	8	0.117	0.323	RNAseq
OPGS012410	ZNF683	9.90611e-08	0.538184	0.550755	8	8	0.037	0.188	RNAseq
OPGS012273	ACTA2-AS1	1.08296e-07	0.194779	0.207085	5	5	0.038	0.18	RNAseq
OPGS006942	SKIV2L	1.28997e-07	-7.05779	-7.07742	46	61	0.154	0.377	RNAseq
OPGS005366	FAS	1.33639e-07	-2.02513	-1.99411	22	23	0.25	0.503	RNAseq
OPGS008356	IL6ST	1.67116e-07	1.17479	1.19387	17	18	0.105	0.315	RNAseq
OPGS013501	HLA-DMA	1.76153e-07	-0.220492	-0.209713	14	14	0.026	0.131	RNAseq
OPGS014316	SPTSSB	1.94777e-07	0.186571	0.177274	7	7	0.02	0.134	RNAseq
OPGS007446	AL645939.6	1.98167e-07	7.8207	7.80343	14	20	0.134	0.341	RNAseq
OPGS001883	CMPK1	2.09936e-07	-0.0898034	-0.0981073	2	2	0.015	0.112	Somalogic	UMP-CMP kinase
OPGS008971	CMC1	2.80299e-07	-2.37935	-2.39607	11	12	0.09	0.291	RNAseq
OPGS008418	SESN3	3.21653e-07	1.72936	1.71014	12	13	0.103	0.306	RNAseq
OPGS006700	TRAV38-1	4.2894e-07	0.892522	0.86691	10	11	0.165	0.362	RNAseq
OPGS006707	AZI2	4.561e-07	1.57032	1.54547	18	20	0.165	0.407	RNAseq
OPGS013406	AL353759.1	5.93432e-07	0.385597	0.376286	8	8	0.027	0.143	RNAseq
OPGS008988	MRPL55	6.21629e-07	0.260141	0.241233	36	36	0.09	0.3	RNAseq
OPGS001625	CA1	7.08455e-07	0.847418	0.855579	5	5	0.021	0.106	Somalogic	Carbonic anhydrase 1
OPGS011425	DNMT3A	7.85022e-07	-0.0189818	-0.0326355	9	9	0.048	0.226	RNAseq
OPGS009448	DGAT2	8.23306e-07	3.37541	3.39245	25	26	0.081	0.213	RNAseq
OPGS004195	TRIM27	1.08615e-06	-2.97348	-3.00762	197	255	0.413	0.633	RNAseq
OPGS000261	LRPAP1	1.0954e-06	-0.782833	-0.800675	289	375	0.188	0.211	Somalogic	alpha-2-macroglobulin receptor-associated protein
OPGS000213	EMC4	1.20069e-06	0.552469	0.578684	64	77	0.222	0.491	Somalogic	ER membrane protein complex subunit 4
OPGS014837	CDK2AP2	1.51989e-06	-0.0879028	-0.0952611	2	2	0.017	0.116	RNAseq
OPGS003776	CARMIL1	1.64373e-06	1.12811	1.1738	113	113	0.56	0.763	RNAseq
OPGS011436	NFKBIA	1.69065e-06	-2.0197	-2.00601	12	12	0.048	0.195	RNAseq
OPGS013311	TMED10	2.14011e-06	0.356611	0.346849	7	7	0.028	0.145	RNAseq
OPGS004501	TBKBP1	2.21209e-06	-14.6769	-14.7081	98	106	0.354	0.616	RNAseq
OPGS014006	AC126544.1	2.29062e-06	-0.347971	-0.338892	5	5	0.023	0.132	RNAseq
OPGS000986	SLC22A16	2.73831e-06	0.553034	0.540416	13	13	0.054	0.228	Somalogic	Solute carrier family 22 member 16
OPGS011855	DNAJB9	2.87565e-06	-0.166114	-0.177996	6	6	0.043	0.183	RNAseq
OPGS005005	HLA-DOA	2.92417e-06	1.8104	1.77683	48	53	0.286	0.525	RNAseq
OPGS004981	AC006026.3	3.84825e-06	-5.03595	-5.002	74	75	0.289	0.55	RNAseq
OPGS006500	THBS3	4.03527e-06	-2.06741	-2.04598	45	50	0.176	0.42	RNAseq
OPGS007604	U91328.1	4.21762e-06	0.297071	0.278494	56	58	0.128	0.342	RNAseq
OPGS016523	GPR15	4.23418e-06	-0.610245	-0.604854	1	1	0.009	0.075	RNAseq
OPGS009163	HCG11	4.40616e-06	-1.16047	-1.14391	18	18	0.086	0.273	RNAseq
OPGS000011	MST1	4.70615e-06	0.746143	0.701971	445	495	0.683	0.809	Somalogic	Hepatocyte growth factor-like protein
OPGS014070	SEC24C	4.87736e-06	-0.0913646	-0.100228	3	3	0.022	0.123	RNAseq
OPGS010850	LTA	4.92983e-06	0.0532541	0.0412872	18	20	0.056	0.231	RNAseq
OPGS015253	WNT10A	5.02598e-06	0.261615	0.254499	6	6	0.014	0.121	RNAseq
OPGS013709	CACNA2D3	5.11146e-06	-0.460003	-0.468839	9	9	0.025	0.151	RNAseq
OPGS003782	CAST	5.12742e-06	-4.51697	-4.47471	134	143	0.555	0.656	RNAseq
OPGS000007	PILRA	5.22747e-06	0.3636	0.408826	370	425	0.709	0.808	Somalogic	Paired immunoglobulin-like type 2 receptor alpha isoform FDF03-deltaTM
OPGS010255	HLA-DPA1	5.45245e-06	1.75867	1.74458	12	13	0.065	0.224	RNAseq
OPGS011402	AF129408.1	5.63696e-06	-0.504372	-0.491942	13	13	0.048	0.224	RNAseq
OPGS004634	DDX59	5.67747e-06	0.726355	0.693584	86	89	0.335	0.568	RNAseq
OPGS002658	CCL22	5.72622e-06	-0.0205881	-0.026176	7	7	0.013	0.102	Olink	C-C motif chemokine 22
OPGS001671	FASLG	6.0473e-06	-0.195553	-0.187577	8	8	0.02	0.146	Somalogic	Tumor necrosis factor ligand superfamily member 6, soluble form
OPGS001509	TNR	6.46939e-06	0.274691	0.266924	5	6	0.025	0.166	Somalogic	Tenascin-R
OPGS012152	RNF2	7.33325e-06	0.287201	0.29826	20	20	0.04	0.192	RNAseq
OPGS013354	TNFRSF11A	7.45431e-06	-0.0199663	-0.0290378	6	6	0.028	0.154	RNAseq
OPGS008278	DPEP3	7.79078e-06	6.19904	6.18206	29	29	0.107	0.308	RNAseq
OPGS002046	ASH2L	8.21752e-06	0.202219	0.197002	1	1	0.012	0.099	Somalogic	Set1/Ash2 histone methyltransferase complex subunit ASH2
OPGS011496	SORCS3	9.04269e-06	-0.459691	-0.447602	11	11	0.047	0.205	RNAseq
OPGS007929	COL9A2	9.59877e-06	0.326319	0.345875	30	30	0.117	0.346	RNAseq
OPGS004134	H2BC5	1.02759e-05	5.54411	5.5764	124	136	0.427	0.63	RNAseq
OPGS002219	ZNF843	1.08736e-05	0.268122	0.262667	2	2	0.011	0.098	Somalogic	Zinc finger protein 843
OPGS007531	AHR	1.08925e-05	0.0497941	0.0696782	42	42	0.131	0.344	RNAseq
OPGS001462	CRYBB2	1.0954e-05	0.160058	0.151319	5	5	0.027	0.156	Somalogic	Beta-crystallin B2
OPGS014017	ANAPC15	1.10659e-05	1.45466	1.44649	3	3	0.022	0.132	RNAseq
OPGS000351	C1GALT1C1	1.1303e-05	0.282182	0.300534	68	75	0.151	0.407	Somalogic	C1GALT1-specific chaperone 1
OPGS001928	SNX1	1.22462e-05	0.249	0.242622	2	2	0.014	0.115	Somalogic	Sorting nexin-1
OPGS009225	CD5	1.25033e-05	-1.82695	-1.84245	19	20	0.085	0.277	RNAseq
OPGS000632	STOM	1.31031e-05	0.347543	0.332658	56	63	0.093	0.301	Somalogic	Erythrocyte band 7 integral membrane protein
OPGS009118	LY6G5C	1.435e-05	8.07473	8.05924	13	15	0.087	0.272	RNAseq
OPGS015517	RAB13	1.50858e-05	-0.406772	-0.401552	1	1	0.013	0.098	RNAseq
OPGS001719	UTS2B	1.57399e-05	0.216079	0.210555	2	3	0.019	0.121	Somalogic	Urotensin-2B
OPGS000214	ICAM5	1.83118e-05	0.106829	0.126036	57	66	0.221	0.445	Somalogic	Intercellular adhesion molecule 5
OPGS008529	CRIP3	1.87106e-05	-2.38568	-2.40177	17	18	0.101	0.299	RNAseq
OPGS008023	ARNT	1.89762e-05	-8.04332	-8.05861	29	36	0.115	0.229	RNAseq
OPGS001964	AXIN2	2.01746e-05	0.588948	0.594659	2	2	0.013	0.089	Somalogic	Axin-2
OPGS001075	HIBCH	2.03415e-05	-0.167599	-0.179396	14	19	0.047	0.208	Somalogic	3-hydroxyisobutyryl-CoA hydrolase, mitochondrial
OPGS000664	BPIFA2	2.04666e-05	0.216857	0.232628	41	42	0.088	0.306	Somalogic	BPI fold-containing family A member 2
OPGS001010	NOG	2.19614e-05	-0.949994	-0.941312	2	3	0.052	0.18	Somalogic	Noggin
OPGS007237	COL11A2	2.33455e-05	-7.38731	-7.40484	40	45	0.142	0.217	RNAseq
OPGS013762	CFH	2.5222e-05	-0.0392766	-0.0315359	5	5	0.024	0.146	RNAseq
OPGS006172	NDFIP1	2.64365e-05	-0.112653	-0.134683	41	43	0.193	0.451	RNAseq
OPGS013165	B3GALT2	2.70921e-05	1.29727	1.30522	7	7	0.029	0.145	RNAseq
OPGS006001	HLA-DQA1	3.07251e-05	-9.97379	-9.9538	29	38	0.203	0.433	RNAseq
OPGS012358	SFRP5	3.15055e-05	-0.546095	-0.539664	74	93	0.037	0.193	RNAseq
OPGS008687	HMGN1	3.17459e-05	-0.306218	-0.290217	16	17	0.097	0.312	RNAseq
OPGS000719	PTHLH	3.19586e-05	-0.890559	-0.904272	14	15	0.081	0.281	Somalogic	Parathyroid hormone-related protein
OPGS000391	CD3E	3.41564e-05	0.96411	0.981479	53	59	0.141	0.373	Somalogic	T-cell surface glycoprotein CD3 epsilon chain
OPGS000221	FAM177A1	3.52754e-05	-0.671729	-0.694455	118	122	0.213	0.443	Somalogic	Protein FAM177A1
OPGS008786	GABBR1	3.66977e-05	1.41577	1.40228	99	128	0.094	0.277	RNAseq
OPGS015226	WAC	3.74589e-05	0.156875	0.151185	6	6	0.015	0.132	RNAseq
OPGS001187	ALPI	3.92088e-05	-0.0983501	-0.107793	18	20	0.039	0.21	Somalogic	Intestinal-type alkaline phosphatase
OPGS009960	PSMB8	4.04458e-05	-6.89108	-6.87725	5	5	0.07	0.186	RNAseq
OPGS000390	PPT1	4.17522e-05	-0.195854	-0.213793	74	81	0.141	0.356	Somalogic	Palmitoyl-protein thioesterase 1
OPGS008167	STK10	4.19238e-05	0.369914	0.356594	15	24	0.11	0.328	RNAseq
OPGS000009	PILRA	4.22748e-05	0.210234	0.250538	357	408	0.694	0.791	Somalogic	Paired immunoglobulin-like type 2 receptor alpha isoform FDF03-M14
OPGS001207	APOM	4.53013e-05	0.856095	0.86581	18	18	0.038	0.173	Somalogic	Apolipoprotein M
OPGS001893	IL17F	4.53935e-05	0.0489292	0.0528771	1	1	0.015	0.11	Somalogic	Interleukin-17F
OPGS008005	GNGT2	4.59895e-05	1.01556	0.997747	33	33	0.115	0.318	RNAseq
OPGS004071	MTRF1L	4.90653e-05	4.20929	4.17552	114	118	0.444	0.656	RNAseq
OPGS012136	NFIL3	5.01673e-05	-0.454524	-0.463845	10	10	0.04	0.19	RNAseq
OPGS010994	CD27	5.39987e-05	-0.298068	-0.289569	10	13	0.054	0.238	RNAseq
OPGS001681	ATP5F1B	5.49397e-05	2.51328	2.51999	2	2	0.02	0.11	Somalogic	ATP synthase subunit beta, mitochondrial
OPGS000628	FLRT3	5.54603e-05	-0.0574952	-0.0724527	64	66	0.094	0.311	Somalogic	Leucine-rich repeat transmembrane protein FLRT3
OPGS012196	AL358113.1	5.81935e-05	-1.12721	-1.11678	13	13	0.039	0.2	RNAseq
OPGS001260	ZAP70	6.08916e-05	1.08218	1.09194	2	2	0.035	0.141	Somalogic	Tyrosine-protein kinase ZAP-70
OPGS011472	FEZ1	6.13435e-05	0.687619	0.699136	12	12	0.047	0.212	RNAseq
OPGS000521	TMPRSS11D	6.47553e-05	-0.0812879	-0.0959778	73	77	0.113	0.307	Somalogic	Transmembrane protease serine 11D
OPGS005433	MICB	6.78725e-05	-6.32084	-6.34104	58	77	0.244	0.336	RNAseq
OPGS005634	TRIM24	6.8155e-05	-0.946318	-0.966121	28	40	0.226	0.478	RNAseq
OPGS004204	CYP2S1	7.27324e-05	3.97825	3.94793	18	24	0.411	0.613	RNAseq
OPGS001238	DOCK9	7.5828e-05	0.259177	0.250229	14	15	0.037	0.181	Somalogic	Dedicator of cytokinesis protein 9
OPGS010066	PSMG1	7.81623e-05	-0.189026	-0.175758	31	31	0.068	0.257	RNAseq
OPGS015819	TRAV8-3	8.00332e-05	-0.138434	-0.143517	2	2	0.011	0.103	RNAseq
OPGS009557	HIBCH	8.045e-05	1.61028	1.59712	24	26	0.078	0.285	RNAseq
OPGS009356	IP6K2	8.24643e-05	-2.72935	-2.74309	23	23	0.082	0.241	RNAseq
OPGS006973	LINC00342	8.3784e-05	-1.40728	-1.38851	50	53	0.153	0.382	RNAseq
OPGS006795	MRC1	8.53303e-05	-0.0525551	-0.0609698	11	15	0.161	0.368	RNAseq
OPGS010576	ANTXR2	9.07031e-05	2.17935	2.19094	15	15	0.06	0.235	RNAseq
OPGS016323	AL450267.2	9.1747e-05	0.181338	0.177688	1	1	0.009	0.081	RNAseq
OPGS002512	TNR	9.6521e-05	0.135904	0.12249	22	23	0.083	0.282	Olink	Tenascin-R
OPGS008268	CD4	9.76662e-05	2.83371	2.82237	16	23	0.107	0.258	RNAseq
OPGS000969	TFRC	9.8165e-05	0.362372	0.350988	7	7	0.056	0.226	Somalogic	Transferrin receptor protein 1
OPGS001435	KAT6A	0.000101004	1.01394	1.02096	2	2	0.028	0.139	Somalogic	Histone acetyltransferase KAT6A
OPGS014386	MANF	0.000102159	0.62166	0.615877	2	3	0.02	0.114	RNAseq
OPGS011316	MYOSLID	0.000106825	0.27755	0.267257	27	28	0.049	0.212	RNAseq
OPGS010624	TRBV18	0.000107248	-0.471653	-0.481633	31	42	0.059	0.242	RNAseq
OPGS003821	ADAM15	0.000107361	0.712672	0.678713	123	139	0.54	0.725	RNAseq
OPGS001348	FAM241B	0.000121318	0.857844	0.865699	4	4	0.031	0.151	Somalogic	Uncharacterized protein C10orf35
OPGS001810	RBM24	0.000121959	0.761615	0.766736	2	2	0.017	0.101	Somalogic	RNA-binding protein 24
OPGS010277	CXCR6	0.000124489	0.0955476	0.0863675	27	33	0.065	0.245	RNAseq
OPGS013293	LINC01232	0.000128409	0.925126	0.917832	5	5	0.028	0.134	RNAseq
OPGS010024	UBXN10	0.000128564	-0.65898	-0.647557	8	9	0.069	0.246	RNAseq
OPGS001551	CFD	0.00012859	1.07018	1.07731	2	2	0.024	0.135	Somalogic	Complement factor D
OPGS016826	AL080276.2	0.000133455	0.0793038	0.0754077	1	1	0.008	0.083	RNAseq
OPGS007345	DNASE1L3	0.000134735	1.61807	1.63468	24	33	0.138	0.368	RNAseq
OPGS002559	CCL19	0.000145097	-0.373823	-0.383234	58	74	0.048	0.198	Olink	C-C motif chemokine 19
OPGS005757	RYBP	0.000146025	-0.167873	-0.146247	36	38	0.217	0.469	RNAseq
OPGS002420	IL12B	0.000148215	0.700026	0.678642	88	95	0.225	0.462	Olink	Interleukin-12 subunit beta
OPGS014293	SPCS3	0.000148276	0.0645343	0.0580499	5	5	0.02	0.135	RNAseq
OPGS010840	ACOXL	0.000158496	-2.04035	-2.03044	26	27	0.056	0.186	RNAseq
OPGS011084	GNPTAB	0.000158535	1.01621	1.00606	12	12	0.053	0.205	RNAseq
OPGS002657	FGF19	0.000163394	0.00927158	0.00431822	13	13	0.013	0.108	Olink	Fibroblast growth factor 19
OPGS014483	IPO7	0.000164853	0.108822	0.115029	4	4	0.019	0.14	RNAseq
OPGS011698	JAK2	0.000165377	-0.131375	-0.121929	13	14	0.045	0.204	RNAseq
OPGS008271	LINC01088	0.000165991	0.261409	0.24593	16	16	0.107	0.315	RNAseq
OPGS007682	AC016831.4	0.000168372	-0.410057	-0.399776	10	16	0.126	0.34	RNAseq
OPGS016689	ENHO	0.000170012	0.17109	0.166847	1	1	0.008	0.085	RNAseq
OPGS008034	SIDT2	0.000178845	13.0722	13.086	16	18	0.115	0.277	RNAseq
OPGS007208	ALG10B	0.000181958	1.28567	1.30286	162	165	0.143	0.363	RNAseq
OPGS005077	IKBIP	0.000182643	1.47895	1.50384	38	39	0.278	0.526	RNAseq
OPGS001105	ZG16	0.000184214	1.94592	1.9532	19	25	0.046	0.191	Somalogic	Zymogen granule membrane protein 16
OPGS001478	COA3	0.000187376	0.722912	0.72918	3	3	0.026	0.139	Somalogic	Cytochrome c oxidase assembly factor 3 homolog, mitochondrial
OPGS002604	CXCL16	0.000188546	0.180637	0.188328	21	21	0.03	0.168	Olink	C-X-C motif chemokine 16
OPGS015495	ZNF385C	0.000198227	-0.966118	-0.97085	1	1	0.013	0.094	RNAseq
OPGS000958	CXCL16	0.000199716	-0.173525	-0.163547	23	25	0.057	0.233	Somalogic	C-X-C motif chemokine 16
OPGS013787	WDR92	0.000202193	0.384537	0.37737	4	4	0.024	0.145	RNAseq
OPGS013297	NUBP1	0.000206262	-0.492024	-0.484067	6	6	0.028	0.166	RNAseq
OPGS005919	COX6B1	0.000207437	3.1576	3.14122	38	42	0.208	0.449	RNAseq
OPGS009857	ICAM5	0.000212526	2.63225	2.64369	14	15	0.072	0.255	RNAseq
OPGS013359	TM9SF4	0.000225724	-0.21833	-0.211856	6	7	0.028	0.152	RNAseq
OPGS000204	PRDM1	0.000234939	0.931539	0.910515	150	162	0.233	0.478	Somalogic	PR domain zinc finger protein 1
OPGS013654	PLAUR	0.000243416	-0.823701	-0.81623	3	3	0.025	0.138	RNAseq
OPGS013432	FXN	0.000255209	0.113641	0.121143	7	7	0.027	0.156	RNAseq
OPGS005346	MRPL45P2	0.000265651	8.28965	8.31222	54	55	0.252	0.494	RNAseq
OPGS012605	HSPA1A	0.000271593	-1.67007	-1.67738	9	11	0.035	0.154	RNAseq
OPGS011501	ARF4-AS1	0.000272593	-0.27687	-0.26623	20	20	0.047	0.209	RNAseq
OPGS006672	TNNI2	0.000273371	1.27902	1.26096	25	25	0.167	0.399	RNAseq
OPGS000698	ADH1B	0.00027819	-0.239988	-0.250987	45	49	0.085	0.298	Somalogic	Alcohol dehydrogenase 1B
OPGS011017	POLR2A	0.000279417	-3.10631	-3.09755	9	11	0.053	0.142	RNAseq
OPGS011206	SAP30L-AS1	0.000294585	0.348332	0.338895	15	15	0.051	0.225	RNAseq
OPGS010174	H2BC9	0.000299212	2.43457	2.42279	16	17	0.066	0.238	RNAseq
OPGS001199	C5|C6	0.000301924	-1.85772	-1.8663	4	4	0.039	0.129	Somalogic	Complement C5b-C6 complex
OPGS001440	PPY	0.000302759	0.190596	0.196307	6	12	0.028	0.15	Somalogic	Pancreatic hormone
OPGS008643	TRIM40	0.000304736	-4.47669	-4.49087	13	14	0.098	0.185	RNAseq
OPGS015496	TMEM104	0.000306424	0.160631	0.155696	1	1	0.013	0.119	RNAseq
OPGS004164	IRF5	0.00031543	-1.24336	-1.21436	78	80	0.418	0.648	RNAseq
OPGS011070	DPY19L4	0.000316863	-0.47774	-0.467609	15	15	0.053	0.232	RNAseq
OPGS007532	GIGYF1	0.000334281	-8.6227	-8.60745	26	27	0.131	0.338	RNAseq
OPGS009409	PRPF6	0.000338296	-0.708938	-0.696681	10	10	0.081	0.267	RNAseq
OPGS013033	AP000977.1	0.000338656	-1.29767	-1.29034	3	3	0.03	0.162	RNAseq
OPGS008119	TRIM38	0.000339392	4.74936	4.73419	32	34	0.112	0.239	RNAseq
OPGS016915	TSPO2	0.000342051	0.13616	0.139923	1	1	0.007	0.077	RNAseq
OPGS006787	IL1RL1	0.00034334	0.243946	0.229463	38	41	0.161	0.394	RNAseq
OPGS001895	CLGN	0.000355732	0.038166	0.0335166	1	1	0.015	0.101	Somalogic	Calmegin
OPGS011971	RIPOR1	0.000361418	2.26984	2.26031	11	11	0.041	0.158	RNAseq
OPGS001221	IL23R	0.000364522	-0.249658	-0.241408	5	5	0.037	0.169	Somalogic	Interleukin-23 receptor
OPGS001579	CD8B	0.000375363	0.92533	0.931792	2	2	0.023	0.129	Somalogic	T-cell surface glycoprotein CD8 beta chain
OPGS006999	ADAMTSL4	0.00039353	6.66747	6.68164	33	42	0.152	0.276	RNAseq
OPGS000836	XCL1	0.000395524	-0.932573	-0.945031	20	21	0.069	0.268	Somalogic	Lymphotactin
OPGS000108	ICAM5	0.000415724	0.322987	0.344439	86	99	0.36	0.578	Somalogic	Intercellular adhesion molecule 5
OPGS001528	H1-2	0.000422334	-0.189154	-0.196525	2	2	0.025	0.144	Somalogic	Histone H1.2
OPGS002608	ITGB2	0.000435796	-0.207402	-0.214044	6	9	0.028	0.149	Olink	Integrin beta-2
OPGS004861	GRB14	0.000439425	4.19497	4.21827	74	78	0.303	0.446	RNAseq
OPGS015551	PPOX	0.000444594	-0.8885	-0.891381	1	2	0.013	0.064	RNAseq
OPGS000331	TAPBP	0.000448287	-0.349254	-0.333033	61	74	0.157	0.333	Somalogic	Tapasin
OPGS015066	PDE12	0.000471222	0.112663	0.109931	5	6	0.015	0.126	RNAseq
OPGS000873	TNS2	0.000476597	0.36057	0.350085	36	37	0.065	0.256	Somalogic	Tensin-2
OPGS012900	TTC9C	0.000484982	-2.31608	-2.32291	7	7	0.032	0.145	RNAseq
OPGS001641	KLRF1	0.000508354	0.215113	0.20862	5	5	0.021	0.137	Somalogic	Killer cell lectin-like receptor subfamily F member 1
OPGS011073	TRBV7-3	0.000515494	2.59269	2.58467	8	10	0.053	0.205	RNAseq
OPGS011901	DTHD1	0.000516017	1.09003	1.08113	8	8	0.042	0.195	RNAseq
OPGS013239	GCHFR	0.000517483	-0.588563	-0.582177	5	5	0.029	0.125	RNAseq
OPGS014950	SUGP1	0.000532875	-0.269338	-0.263954	3	3	0.016	0.114	RNAseq
OPGS010663	SPRED2	0.00054	0.505184	0.495373	11	11	0.059	0.237	RNAseq
OPGS011965	CEACAM1	0.00054189	-0.458756	-0.450322	11	15	0.042	0.195	RNAseq
OPGS004986	H3C6	0.000548865	-21.7737	-21.7519	63	64	0.288	0.42	RNAseq
OPGS009259	DOK1	0.000551556	2.95803	2.9699	19	19	0.084	0.227	RNAseq
OPGS007348	CALM1	0.000561441	-0.239169	-0.255622	21	21	0.138	0.368	RNAseq
OPGS015742	CATSPER2	0.000562132	0.64845	0.651788	1	2	0.012	0.088	RNAseq
OPGS001229	STIM1	0.000593078	0.219516	0.226105	22	31	0.037	0.195	Somalogic	Stromal interaction molecule 1
OPGS005262	ANKRD55	0.000594848	0.823689	0.845086	33	34	0.259	0.502	RNAseq
OPGS013847	MIB1	0.000596521	0.439279	0.432657	5	5	0.024	0.133	RNAseq
OPGS001574	KRTAP2-4	0.000602698	0.0596441	0.0534607	5	5	0.023	0.127	Somalogic	Keratin-associated protein 2-4
OPGS000796	GPNMB	0.000605047	-0.390122	-0.400451	16	16	0.073	0.251	Somalogic	Transmembrane glycoprotein NMB
OPGS015568	WDR62	0.000606132	-0.404265	-0.39925	3	3	0.013	0.115	RNAseq
OPGS015443	MAP3K14	0.00061394	-0.0746011	-0.072151	1	2	0.013	0.106	RNAseq
OPGS003769	WAC-AS1	0.000621443	-0.925631	-0.894004	69	75	0.565	0.759	RNAseq
OPGS016354	FOSB	0.000628967	-0.376588	-0.379888	1	1	0.009	0.077	RNAseq
OPGS005729	ENG	0.000633741	1.09595	1.11583	23	24	0.22	0.38	RNAseq
OPGS013534	SOS1	0.000639182	0.2562	0.261898	8	8	0.026	0.131	RNAseq
OPGS006070	IKZF1	0.000642503	-2.3508	-2.33165	33	33	0.199	0.447	RNAseq
OPGS000003	FCGR2A	0.000644072	1.12724	1.09055	245	276	0.745	0.845	Somalogic	Low affinity immunoglobulin gamma Fc region receptor II-a
OPGS005147	PODXL2	0.000647949	-0.633785	-0.612852	29	30	0.272	0.433	RNAseq
OPGS003787	FAM118A	0.000657535	-14.8627	-14.8326	41	52	0.553	0.705	RNAseq
OPGS000373	C7	0.000659084	2.78862	2.80454	41	42	0.144	0.354	Somalogic	Complement component C7
OPGS005389	TRAV23DV6	0.000661089	5.96365	5.94304	119	139	0.248	0.429	RNAseq
OPGS011124	SERPINF1	0.000666678	0.412906	0.420353	13	26	0.052	0.225	RNAseq
OPGS004359	SRA1	0.000669332	-1.95404	-1.92722	90	95	0.378	0.602	RNAseq
OPGS001427	A2M	0.000678049	0.0251343	0.0313741	6	6	0.028	0.16	Somalogic	Alpha-2-macroglobulin
OPGS005209	THUMPD3-AS1	0.000701866	-0.0165983	0.00379834	27	32	0.265	0.493	RNAseq
OPGS001812	FGF19	0.000703533	-0.0358655	-0.0412049	10	10	0.017	0.126	Somalogic	Fibroblast growth factor 19
OPGS005943	ERN1	0.000713304	8.91926	8.9014	23	27	0.207	0.407	RNAseq
OPGS006649	ZSCAN9	0.000716509	-2.99189	-2.97857	29	35	0.168	0.335	RNAseq
OPGS014094	NAF1	0.000730001	1.00477	0.999287	3	3	0.022	0.136	RNAseq
OPGS010496	AL445426.1	0.000733071	1.22586	1.21607	12	12	0.061	0.229	RNAseq
OPGS011925	LINC02680	0.000748159	0.764951	0.756374	17	18	0.042	0.2	RNAseq
OPGS016267	UQCC2	0.000787328	0.044505	0.048413	1	1	0.009	0.084	RNAseq
OPGS003931	SEMA4A	0.000788247	-1.06149	-1.032	45	56	0.492	0.713	RNAseq
OPGS004935	GATAD2A	0.000788936	-3.95545	-3.93438	49	68	0.295	0.531	RNAseq
OPGS003802	IQSEC3	0.00081322	-5.15502	-5.12327	81	93	0.547	0.755	RNAseq
OPGS007999	MAST3	0.000816728	0.14075	0.154877	31	31	0.116	0.333	RNAseq
OPGS001191	GNRH1	0.000819156	-0.24313	-0.250792	13	14	0.039	0.189	Somalogic	Progonadoliberin-1
OPGS000027	ACP1	0.000821738	1.33568	1.36537	135	153	0.586	0.77	Somalogic	Low molecular weight phosphotyrosine protein phosphatase
OPGS004146	DSE	0.000825795	-3.63597	-3.66295	167	171	0.424	0.643	RNAseq
OPGS013179	P2RY11	0.000830816	-0.827251	-0.821739	3	4	0.029	0.127	RNAseq
OPGS013283	AC108704.2	0.000831202	0.304615	0.298077	20	21	0.028	0.16	RNAseq
OPGS010203	ZC3H18	0.000832715	-0.969288	-0.980428	14	14	0.066	0.252	RNAseq
OPGS003618	NOD2	0.000835866	2.56622	2.60012	106	118	0.671	0.794	RNAseq
OPGS003818	ITGB2	0.000838197	0.61238	0.582336	31	39	0.542	0.712	RNAseq
OPGS008165	ANKRD26	0.000840131	-6.7726	-6.78577	30	31	0.11	0.186	RNAseq
OPGS000916	CD63	0.000840337	0.0931432	0.103483	19	19	0.061	0.24	Somalogic	CD63 antigen
OPGS006654	STK24	0.000846797	0.967395	0.95094	45	46	0.168	0.396	RNAseq
OPGS004280	SYNGR1	0.000852369	1.61267	1.6377	37	47	0.392	0.622	RNAseq
OPGS005955	USP3	0.000862111	-0.907357	-0.888221	55	58	0.206	0.444	RNAseq
OPGS001243	C1QTNF9	0.000870589	0.881027	0.888357	4	4	0.036	0.167	Somalogic	Complement C1q and tumor necrosis factor-related protein 9A
OPGS000280	PRTN3	0.000874242	-0.677704	-0.694534	33	43	0.178	0.424	Somalogic	Myeloblastin
OPGS002437	PRSS27	0.000874404	0.0731611	0.0898526	98	107	0.187	0.417	Olink	Serine protease 27
OPGS004030	YWHAB	0.000874647	-0.282867	-0.256119	68	74	0.456	0.632	RNAseq
OPGS016981	IFT22	0.000880098	0.551923	0.548632	1	1	0.007	0.061	RNAseq
OPGS004216	GPR35	0.000883133	-3.84512	-3.86606	62	63	0.409	0.636	RNAseq
OPGS008434	SLC49A4	0.000885266	0.0112613	-0.000724946	12	14	0.103	0.306	RNAseq
OPGS007900	AC073508.3	0.000910235	-0.50232	-0.488224	10	12	0.118	0.332	RNAseq
OPGS016104		0.000926709	0.231062	0.227366	1	1	0.01	0.099	RNAseq
OPGS005522	PET100	0.00093257	0.811585	0.794926	7	12	0.236	0.434	RNAseq
OPGS006823	NME6	0.000938059	9.33632	9.32	61	62	0.16	0.368	RNAseq
OPGS006619	RP11-62H7.2	0.000940088	-0.283091	-0.26829	63	68	0.169	0.414	RNAseq
OPGS005727	GPSM1	0.000971027	0.234733	0.215805	21	27	0.22	0.475	RNAseq
OPGS006738	FFAR3	0.000973855	2.13463	2.15079	37	38	0.163	0.414	RNAseq
OPGS004933	RNF144B	0.000974602	2.8747	2.89599	145	149	0.295	0.548	RNAseq
OPGS001608	RAPGEF5	0.000974845	0.984927	0.991151	2	2	0.022	0.12	Somalogic	Rap guanine nucleotide exchange factor 5
OPGS001244	HTN1	0.000977138	-0.103237	-0.110493	20	21	0.036	0.166	Somalogic	Histatin-1
OPGS011731	ARPC4	0.000978463	-0.205256	-0.212287	6	8	0.044	0.173	RNAseq
OPGS002289	INHBC	0.000978565	-0.064244	-0.067656	2	2	0.01	0.084	Somalogic	Inhibin beta C chain
OPGS012406	KANK3	0.00099723	-0.259584	-0.252079	6	6	0.037	0.17	RNAseq
OPGS011262	GNAL	0.00101427	-0.659616	-0.669448	15	15	0.05	0.216	RNAseq
OPGS007539	ATP5MPL	0.00101488	1.55113	1.56216	15	21	0.131	0.253	RNAseq
OPGS000885	DPEP2	0.00101491	-0.372218	-0.381467	16	17	0.064	0.245	Somalogic	Dipeptidase 2
OPGS007167	ABT1	0.00102073	4.64968	4.6347	40	43	0.145	0.248	RNAseq
OPGS008330	ASS1P1	0.00102793	0.844675	0.858491	20	21	0.106	0.317	RNAseq
OPGS008536	PTMAP4	0.00103261	0.32502	0.322992	5	9	0.101	0.083	RNAseq
OPGS001687	ANP32B	0.00105604	0.0179287	0.0120349	6	6	0.02	0.124	Somalogic	Acidic leucine-rich nuclear phosphoprotein 32 family member B
OPGS010809	LARP4B	0.00107236	0.21298	0.203345	14	16	0.056	0.224	RNAseq
OPGS011614	H2BC7	0.00107663	0.468182	0.476997	9	9	0.046	0.192	RNAseq
OPGS000116	CCL15	0.00108018	-2.4369	-2.45933	56	68	0.346	0.474	Somalogic	C-C motif chemokine 15
OPGS011612	LINC02694	0.00108266	-0.219963	-0.211724	10	10	0.046	0.211	RNAseq
OPGS007376	ZBTB7B	0.00108389	3.16756	3.15226	33	35	0.137	0.365	RNAseq
OPGS010692	IPO9	0.0010964	0.285897	0.27675	9	9	0.058	0.235	RNAseq
OPGS012426	SLC26A6	0.00111971	-0.805308	-0.797522	9	10	0.036	0.149	RNAseq
OPGS004310	AP003071.5	0.00113128	-1.48823	-1.51305	57	57	0.387	0.614	RNAseq
OPGS012608	SEC11C	0.00113511	0.20187	0.194432	9	9	0.035	0.179	RNAseq
OPGS011983	CCT5	0.00114147	0.389743	0.39795	6	6	0.041	0.178	RNAseq
OPGS004491	TTC9	0.00114203	-1.93539	-1.91218	64	71	0.356	0.582	RNAseq
OPGS013349	UNC119	0.00115062	-0.135505	-0.141772	4	4	0.028	0.159	RNAseq
OPGS005000	SLC40A1	0.00115177	0.226577	0.247381	54	61	0.286	0.535	RNAseq
OPGS009260	CSK	0.00115265	-1.12145	-1.13276	22	22	0.084	0.286	RNAseq
OPGS012362	EPHA2	0.00115551	0.264697	0.270477	9	21	0.037	0.188	RNAseq
OPGS006611	C1orf112	0.001156	-1.18154	-1.16903	51	58	0.17	0.389	RNAseq
OPGS001223	IL11RA	0.00116385	-0.559557	-0.551765	13	13	0.037	0.173	Somalogic	Interleukin-11 receptor subunit alpha
OPGS003774	RUFY1	0.00116749	-2.9357	-2.90615	82	82	0.562	0.754	RNAseq
OPGS012296	CARNS1	0.00119695	-0.978754	-0.971675	8	9	0.038	0.184	RNAseq
OPGS010093	SYNE1	0.00121684	-1.12764	-1.11744	13	13	0.068	0.249	RNAseq
OPGS015663	C17orf113	0.00126248	-0.303811	-0.307928	1	1	0.012	0.099	RNAseq
OPGS012559	CORO1B	0.00126515	0.365237	0.358613	7	8	0.035	0.182	RNAseq
OPGS014082	ASXL1	0.00127179	-0.21897	-0.215059	4	6	0.022	0.122	RNAseq
OPGS003592	SH3YL1	0.00127432	0.738726	0.706389	109	119	0.698	0.82	RNAseq
OPGS000925	PLXDC1	0.00130214	-0.268444	-0.278562	19	20	0.06	0.233	Somalogic	Plexin domain-containing protein 1
OPGS001365	CNMD	0.00133719	-0.0263737	-0.0198374	3	3	0.03	0.147	Somalogic	Leukocyte cell-derived chemotaxin 1
OPGS000164	IL27RA	0.00133947	1.23108	1.2108	23	42	0.269	0.468	Somalogic	Interleukin-27 receptor subunit alpha
OPGS001072	ARSK	0.0013429	0.384926	0.393085	14	14	0.047	0.225	Somalogic	Arylsulfatase K
OPGS015218	SSBP3	0.00134675	-0.654533	-0.657891	2	3	0.015	0.088	RNAseq
OPGS011654	APBB3	0.00135049	-1.48411	-1.47629	14	17	0.045	0.166	RNAseq
OPGS013643	HLA-DQB2	0.0013598	-1.35481	-1.34863	2	3	0.025	0.135	RNAseq
OPGS016037	YIPF4	0.00136425	-0.434731	-0.43038	1	1	0.01	0.084	RNAseq
OPGS007101	SSTR3	0.00137214	1.22388	1.20953	31	33	0.148	0.375	RNAseq
OPGS010866	P4HA2	0.00137324	0.227241	0.220767	11	12	0.056	0.211	RNAseq
OPGS012359	LOXL3	0.00137455	2.65454	2.65981	5	8	0.037	0.124	RNAseq
OPGS005059	STIM2	0.00137478	-3.24184	-3.26091	42	48	0.281	0.519	RNAseq
OPGS008987	C6orf89	0.00139125	-1.03321	-1.02099	20	21	0.09	0.302	RNAseq
OPGS015910	MAGI2	0.00139192	-0.223404	-0.227287	1	1	0.011	0.086	RNAseq
OPGS004211	BTBD11	0.00139506	2.27227	2.29706	111	112	0.41	0.641	RNAseq
OPGS012876	MRPS31	0.00142714	0.68949	0.682359	6	6	0.032	0.174	RNAseq
OPGS000844	GDF2	0.00143143	0.229976	0.23957	22	23	0.068	0.248	Somalogic	Growth/differentiation factor 2
OPGS010680	RP11-673E1.3	0.00143324	-0.227505	-0.2218	8	12	0.058	0.185	RNAseq
OPGS001042	CDHR1	0.00144166	-0.301357	-0.293166	12	14	0.05	0.145	Somalogic	Cadherin-related family member 1
OPGS002652	DKK1	0.00144794	-0.0107057	-0.00555497	12	13	0.015	0.119	Olink	Dickkopf-related protein 1
OPGS008253	SPON2	0.0014525	0.243824	0.230217	33	33	0.108	0.314	RNAseq
OPGS008800	C5orf67	0.00146391	-0.301281	-0.313113	25	25	0.094	0.298	RNAseq
OPGS001754	VEGFD	0.00148031	0.124617	0.129677	4	4	0.018	0.118	Somalogic	Vascular endothelial growth factor D
OPGS016195	SOGA1	0.00149703	0.156785	0.160977	1	1	0.01	0.088	RNAseq
OPGS000738	FAS	0.00149866	0.856429	0.867305	20	20	0.079	0.273	Somalogic	Tumor necrosis factor receptor superfamily member 6
OPGS009156	PROC	0.00150727	1.59902	1.61042	18	19	0.086	0.285	RNAseq
OPGS009990	TSPAN17	0.00152013	0.139638	0.128586	12	12	0.069	0.26	RNAseq
OPGS004748	DR1	0.00152792	-26.4983	-26.5173	71	78	0.317	0.572	RNAseq
OPGS010363	DEK	0.00153427	0.86501	0.874156	22	22	0.063	0.231	RNAseq
OPGS015056	TIMMDC1	0.00153579	1.16815	1.17299	1	1	0.015	0.074	RNAseq
OPGS014514	CTD-2561J22.2	0.00153593	0.363414	0.358283	3	3	0.019	0.119	RNAseq
OPGS005969	MAN2B1	0.00154557	4.47707	4.46221	40	52	0.205	0.398	RNAseq
OPGS004129	QSOX1	0.0015486	-1.9522	-1.92573	92	95	0.428	0.658	RNAseq
OPGS002592	VEGFD	0.00159371	0.128766	0.13611	18	19	0.035	0.183	Olink	Vascular endothelial growth factor D
OPGS012813	SLC25A28	0.00160392	-0.0610139	-0.0675957	9	9	0.033	0.176	RNAseq
OPGS001637	PPP3R1	0.00160712	0.736544	0.741974	3	3	0.021	0.125	Somalogic	Calcineurin subunit B type 1
OPGS006439	HLA-DPB1	0.00161364	3.36467	3.3777	26	30	0.178	0.387	RNAseq
OPGS001722	OSM	0.00161736	1.01128	1.01608	1	1	0.019	0.104	Somalogic	Oncostatin-M
OPGS001593	CA4	0.00161736	1.13355	1.13892	1	1	0.022	0.119	Somalogic	Carbonic anhydrase 4
OPGS001527	FOLH1	0.00161737	1.15999	1.16549	1	1	0.025	0.123	Somalogic	Glutamate carboxypeptidase 2
OPGS001580	DSG1	0.00161737	1.19722	1.20289	1	1	0.023	0.108	Somalogic	Desmoglein-1
OPGS001939	TNFRSF11B	0.00161737	0.629373	0.632358	1	1	0.014	0.087	Somalogic	Tumor necrosis factor receptor superfamily member 11B
OPGS002160	ARMC5	0.00161737	0.635885	0.638901	1	1	0.011	0.081	Somalogic	Armadillo repeat-containing protein 5
OPGS001694	LTBR	0.00161737	0.916417	0.920763	1	1	0.02	0.109	Somalogic	Tumor necrosis factor receptor superfamily member 3
OPGS001835	OTUD5	0.00161737	0.807095	0.810922	1	1	0.016	0.103	Somalogic	OTU domain-containing protein 5
OPGS001843	FRZB	0.00161737	0.784136	0.787855	1	1	0.016	0.104	Somalogic	Secreted frizzled-related protein 3
OPGS001856	UPK3BL1	0.00161737	0.909709	0.914023	1	1	0.016	0.106	Somalogic	Uroplakin-3b-like protein
OPGS001892	CCL1	0.00161737	0.79622	0.799996	1	1	0.015	0.091	Somalogic	C-C motif chemokine 1
OPGS001951	TK1	0.00161737	0.875437	0.879588	1	1	0.014	0.1	Somalogic	Thymidine kinase, cytosolic
OPGS001982	TAC4	0.00161737	0.847827	0.851847	1	1	0.013	0.091	Somalogic	Tachykinin-4
OPGS002044	PITPNB	0.00161737	0.872011	0.876146	1	1	0.012	0.088	Somalogic	Phosphatidylinositol transfer protein beta isoform
OPGS002086	SCN4B	0.00161737	0.775378	0.779055	1	1	0.012	0.093	Somalogic	Sodium channel subunit beta-4
OPGS002331	BRF1	0.00161737	0.772002	0.775662	1	1	0.009	0.085	Somalogic	Transcription factor IIIB 90 kDa subunit
OPGS001816	KIF16B	0.00161737	0.941029	0.945491	1	1	0.017	0.107	Somalogic	Kinesin-like protein KIF16B
OPGS001502	ENTPD1	0.00161738	1.07158	1.07666	1	2	0.025	0.136	Somalogic	Ectonucleoside triphosphate diphosphohydrolase 1
OPGS001538	HK1	0.00161738	1.26908	1.2751	1	1	0.024	0.115	Somalogic	Hexokinase-1
OPGS001692	MYOM3	0.00161738	0.923895	0.928276	1	1	0.02	0.126	Somalogic	Myomesin-3
OPGS001747	IL37	0.00161738	0.786903	0.790634	1	1	0.018	0.106	Somalogic	Interleukin-37
OPGS001794	MST1R	0.00161738	0.798194	0.801979	1	1	0.017	0.096	Somalogic	Macrophage-stimulating protein receptor
OPGS001888	ENTPD3	0.00161738	0.824035	0.827943	1	1	0.015	0.101	Somalogic	Ectonucleoside triphosphate diphosphohydrolase 3
OPGS001916	ARHGEF7	0.00161738	0.654293	0.657395	1	1	0.014	0.069	Somalogic	Rho guanine nucleotide exchange factor 7
OPGS001956	EEA1	0.00161738	0.971426	0.976032	1	1	0.014	0.105	Somalogic	Early endosome antigen 1
OPGS001969	TXNIP	0.00161738	0.925132	0.929519	1	1	0.013	0.078	Somalogic	Thioredoxin-interacting protein
OPGS002005	CCPG1	0.00161738	0.939766	0.944223	1	1	0.013	0.104	Somalogic	Cell cycle progression protein 1
OPGS002038	RBBP6	0.00161738	0.874256	0.878402	1	1	0.012	0.089	Somalogic	E3 ubiquitin-protein ligase RBBP6
OPGS002067	PI15	0.00161738	0.854774	0.858827	1	1	0.012	0.087	Somalogic	Peptidase inhibitor 15
OPGS002111	CTF1	0.00161738	0.764256	0.76788	1	1	0.012	0.088	Somalogic	Cardiotrophin-1
OPGS002168	STX6	0.00161738	0.761963	0.765576	1	1	0.011	0.087	Somalogic	Syntaxin-6
OPGS002355	PGRMC2	0.00161738	0.675232	0.678434	1	1	0.009	0.09	Somalogic	Membrane-associated progesterone receptor component 2
OPGS001651	IL34	0.00161738	0.96507	0.969646	1	1	0.021	0.109	Somalogic	Interleukin-34
OPGS001804	SPARCL1	0.00161738	0.876451	0.880607	1	1	0.017	0.104	Somalogic	SPARC-like protein 1
OPGS002037	SNX17	0.00161738	0.898278	0.902538	1	1	0.012	0.093	Somalogic	Sorting nexin-17
OPGS002110	KREMEN2	0.00161738	0.795255	0.799026	1	1	0.012	0.092	Somalogic	Kremen protein 2
OPGS002211	BDP1	0.00161738	0.792497	0.796255	1	1	0.011	0.094	Somalogic	Transcription factor TFIIIB component B'' homolog
OPGS002073	TPO	0.00161738	0.722521	0.725947	1	1	0.012	0.09	Somalogic	Thyroid peroxidase
OPGS002079	CNDP2	0.00161738	0.777273	0.780959	1	1	0.012	0.089	Somalogic	Cytosolic non-specific dipeptidase
OPGS002237	HERC5	0.00161738	0.677146	0.680357	1	1	0.011	0.082	Somalogic	E3 ISG15--protein ligase HERC5
OPGS001521	CDK5|CDK5R1	0.00161739	1.22649	1.23231	1	1	0.025	0.132	Somalogic	Cyclin-dependent kinase 5:Cyclin-dependent kinase 5 activator 1 complex
OPGS001880	LAYN	0.00161739	0.636975	0.639995	1	1	0.015	0.095	Somalogic	Layilin
OPGS002188	SCARA3	0.00161739	0.648466	0.651541	1	1	0.011	0.076	Somalogic	Scavenger receptor class A member 3
OPGS001663	C8A|C8B|C8G	0.00161739	1.03449	1.0394	1	1	0.02	0.108	Somalogic	Complement component C8
OPGS001714	FLT3	0.00161739	1.09602	1.10122	1	1	0.019	0.095	Somalogic	Receptor-type tyrosine-protein kinase FLT3
OPGS001516	TNFSF8	0.00161739	1.00674	1.01151	1	5	0.025	0.117	Somalogic	Tumor necrosis factor ligand superfamily member 8
OPGS001643	ADGRE5	0.00161739	1.2571	1.26307	1	1	0.021	0.112	Somalogic	CD97 antigen
OPGS001711	CBX5	0.00161739	1.14411	1.14954	1	1	0.019	0.101	Somalogic	Chromobox protein homolog 5
OPGS001763	CA10	0.00161739	1.05995	1.06498	1	1	0.018	0.099	Somalogic	Carbonic anhydrase-related protein 10
OPGS001874	MTMR1	0.00161739	1.06042	1.06545	1	1	0.015	0.113	Somalogic	Myotubularin-related protein 1
OPGS001746	RAD51	0.00161739	0.981649	0.986304	1	1	0.018	0.11	Somalogic	DNA repair protein RAD51 homolog 1
OPGS002621	FGF23	0.00164817	-0.214636	-0.208189	13	13	0.025	0.159	Olink	Fibroblast growth factor 23
OPGS004319	ETFA	0.00164869	-2.11029	-2.13462	140	141	0.386	0.604	RNAseq
OPGS013411	GBP6	0.00165035	-0.298977	-0.292356	5	5	0.027	0.159	RNAseq
OPGS000769	FAS	0.00165457	0.552832	0.56321	17	17	0.076	0.273	Somalogic	Tumor necrosis factor receptor superfamily member 6
OPGS001909	ARMC5	0.0016858	-0.0125751	-0.009192	1	2	0.015	0.093	Somalogic	Armadillo repeat-containing protein 5
OPGS012665	DRG1	0.00170275	2.44947	2.45656	14	14	0.034	0.147	RNAseq
OPGS011846	TRBV7-2	0.00172266	0.289156	0.294395	3	6	0.043	0.172	RNAseq
OPGS001375	RARRES2	0.00173394	-0.230867	-0.236895	7	8	0.03	0.163	Somalogic	Retinoic acid receptor responder protein 2
OPGS001128	LCN10	0.00177458	0.837469	0.845443	9	9	0.044	0.179	Somalogic	Epididymal-specific lipocalin-10
OPGS015990	KCNH8	0.00178414	-0.177512	-0.180329	1	1	0.011	0.087	RNAseq
OPGS013630	AC134407.2	0.00178926	-0.692666	-0.697727	10	11	0.025	0.133	RNAseq
OPGS005712	RAPGEF3	0.00182064	-5.44774	-5.46335	43	50	0.22	0.438	RNAseq
OPGS004336	ERAP2	0.00183214	-1.60955	-1.59045	37	51	0.382	0.631	RNAseq
OPGS009687	ADO	0.00183636	-0.152801	-0.14223	33	35	0.075	0.267	RNAseq
OPGS006157	TPM3	0.00185323	0.285784	0.270488	34	45	0.194	0.44	RNAseq
OPGS004213	HLA-DRB6	0.00186009	-16.1698	-16.193	110	127	0.41	0.63	RNAseq
OPGS010861	HCST	0.00186854	3.19303	3.18457	9	10	0.056	0.069	RNAseq
OPGS001779	HTN3	0.00187408	-0.000209224	-0.00506083	6	6	0.018	0.107	Somalogic	Histatin-3
OPGS005687	CTSK	0.00189193	-8.0107	-8.02756	32	38	0.222	0.474	RNAseq
OPGS005870	RP11-798K23.5	0.00189906	0.648915	0.664774	57	60	0.211	0.439	RNAseq
OPGS015017	VIPR1-AS1	0.00194123	-0.360521	-0.364049	2	2	0.016	0.072	RNAseq
OPGS013138	BPGM	0.00194536	-0.0746353	-0.0684824	7	7	0.029	0.161	RNAseq
OPGS001549	IGF1	0.00196079	0.986097	0.992148	3	3	0.024	0.151	Somalogic	Insulin-like growth factor I
OPGS000663	SECTM1	0.00200241	-0.704272	-0.714993	37	43	0.089	0.3	Somalogic	Secreted and transmembrane protein 1
OPGS000812	CTSF	0.0020028	0.75624	0.766052	40	40	0.071	0.253	Somalogic	Cathepsin F
OPGS001534	TPM2	0.00200483	1.31143	1.3162	2	2	0.024	0.125	Somalogic	Tropomyosin beta chain
OPGS016519	PATZ1	0.00200512	-0.592913	-0.596516	1	1	0.009	0.086	RNAseq
OPGS012812	LEMD3	0.00202927	-0.167038	-0.160306	10	11	0.033	0.174	RNAseq
OPGS002619	TGFB1	0.00203316	0.151727	0.157665	6	6	0.025	0.148	Olink	Transforming growth factor beta-1 proprotein
OPGS000388	FAH	0.00203811	0.128684	0.113839	8	9	0.141	0.078	Somalogic	Fumarylacetoacetase
OPGS013626	RAB36	0.00204923	0.267571	0.261628	3	3	0.025	0.126	RNAseq
OPGS010507	EXTL3	0.00205435	0.733633	0.724505	21	21	0.061	0.236	RNAseq
OPGS012492	SCN1B	0.00205437	-0.318324	-0.313238	7	12	0.036	0.17	RNAseq
OPGS014779	HSDL1	0.00205809	-0.905575	-0.909843	2	2	0.017	0.091	RNAseq
OPGS000311	JAK2	0.00206464	-0.849119	-0.86337	52	56	0.164	0.404	Somalogic	Tyrosine-protein kinase JAK2
OPGS007143	DNPH1	0.00207779	1.81135	1.79761	29	31	0.146	0.307	RNAseq
OPGS012210	FOXP4	0.00207993	0.522321	0.530126	4	4	0.039	0.187	RNAseq
OPGS008561	NUGGC	0.00208482	-0.190545	-0.202019	26	26	0.1	0.25	RNAseq
OPGS015124	TRBV7-9	0.00208491	0.202448	0.197885	1	1	0.015	0.124	RNAseq
OPGS008210	FLVCR1	0.00208958	-9.67936	-9.66835	11	13	0.109	0.298	RNAseq
OPGS006121	RAB6B	0.00210837	3.38944	3.37252	49	50	0.196	0.424	RNAseq
OPGS009754	FASTKD5	0.00214558	0.14681	0.157503	7	7	0.074	0.272	RNAseq
OPGS015997	ZSCAN26	0.00216155	1.08624	1.08227	3	3	0.01	0.076	RNAseq
OPGS015727	ZNF563	0.00219103	-0.220883	-0.224833	2	2	0.012	0.097	RNAseq
OPGS002032	TMEM132C	0.00220175	0.162271	0.16657	1	1	0.012	0.104	Somalogic	Transmembrane protein 132C
OPGS002346	AMIGO1	0.00220175	0.139529	0.143226	1	1	0.009	0.09	Somalogic	Amphoterin-induced protein 1
OPGS002042	CUL3	0.00220175	-0.141569	-0.14532	1	1	0.012	0.098	Somalogic	Cullin-3
OPGS002095	DEFB113	0.00220175	0.154328	0.158417	1	1	0.012	0.109	Somalogic	Beta-defensin 113
OPGS001993	SST	0.00220175	-0.131161	-0.134637	1	1	0.013	0.096	Somalogic	Somatostatin-28
OPGS000308	CFHR5	0.0022129	3.18209	3.19528	72	82	0.164	0.289	Somalogic	Complement factor H-related protein 5
OPGS015374	DGKD	0.00226922	-0.103027	-0.0990191	6	6	0.014	0.107	RNAseq
OPGS009505	FAM221A	0.00227064	0.907666	0.917748	15	16	0.079	0.263	RNAseq
OPGS000745	KLRC3	0.00228637	-0.0502777	-0.0593719	14	17	0.078	0.272	Somalogic	NKG2-E type II integral membrane protein
OPGS010627	TPD52L2	0.00230746	-0.707842	-0.717013	11	11	0.059	0.247	RNAseq
OPGS010694	MTCH1	0.00231863	-0.352839	-0.35981	6	7	0.058	0.215	RNAseq
OPGS012587	COL5A1	0.00234002	0.246284	0.252914	9	10	0.035	0.183	RNAseq
OPGS015335	LINC01353	0.00235923	0.842585	0.847002	2	2	0.014	0.058	RNAseq
OPGS006603	AL162424.1	0.00237534	1.56575	1.55924	14	27	0.17	0.362	RNAseq
OPGS006108	P2RY14	0.00241614	0.409295	0.421409	36	43	0.197	0.383	RNAseq
OPGS011641	DOK2	0.00242331	0.960567	0.952237	8	9	0.045	0.172	RNAseq
OPGS000252	GKN2	0.00243893	0.790741	0.777029	56	65	0.192	0.381	Somalogic	Gastrokine-2
OPGS007296	TLR3	0.00250578	2.28479	2.27141	37	37	0.14	0.37	RNAseq
OPGS004555	SMAP1	0.00251153	1.61458	1.63619	61	63	0.345	0.576	RNAseq
OPGS013767	REL	0.00251922	-0.303303	-0.308093	8	8	0.024	0.144	RNAseq
OPGS002574	CCL2	0.00255933	0.21306	0.205723	9	9	0.042	0.184	Olink	C-C motif chemokine 2
OPGS016867	BANP	0.00256318	0.121652	0.118529	1	1	0.007	0.082	RNAseq
OPGS001824	ADM2	0.00258414	0.00245565	-0.00247549	4	4	0.016	0.107	Somalogic	ADM2
OPGS003905	TIAM2	0.00258466	-5.29356	-5.26693	71	79	0.505	0.665	RNAseq
OPGS011338	MUC1	0.00258558	-1.68	-1.67398	13	17	0.049	0.178	RNAseq
OPGS000914	DBNL	0.00259772	-0.047832	-0.0388213	17	22	0.061	0.251	Somalogic	Drebrin-like protein
OPGS005935	TYMP	0.00260224	-1.76937	-1.78596	28	29	0.207	0.444	RNAseq
OPGS011897	GALT	0.00263229	0.212799	0.205731	12	15	0.042	0.193	RNAseq
OPGS008108	H2BC18	0.00265233	-3.09393	-3.10535	14	15	0.112	0.24	RNAseq
OPGS006203	SSH2	0.0026606	7.80753	7.79249	52	55	0.191	0.436	RNAseq
OPGS010106	IMPAD1	0.00267189	0.028888	0.0385515	22	22	0.068	0.262	RNAseq
OPGS008865	AC240565.4	0.00267487	0.557148	0.548568	36	41	0.093	0.294	RNAseq
OPGS016140	HCG4P11	0.00269401	0.34466	0.348432	1	1	0.01	0.109	RNAseq
OPGS000960	CDH15	0.00269417	-0.26852	-0.276582	18	18	0.057	0.228	Somalogic	Cadherin-15
OPGS005161	GOT2	0.00270304	1.20338	1.22281	51	54	0.27	0.518	RNAseq
OPGS010266	AC108463.3	0.00270601	0.804596	0.812523	11	13	0.065	0.248	RNAseq
OPGS001210	NRSN1	0.00271066	0.00915521	0.00149973	10	11	0.038	0.185	Somalogic	Neurensin-1
OPGS001084	ASCC1	0.00271667	0.270546	0.278187	12	13	0.047	0.204	Somalogic	Activating signal cointegrator 1 complex subunit 1
OPGS006510	Z84485.1	0.00271696	0.220041	0.20436	23	23	0.175	0.397	RNAseq
OPGS007833	C7orf31	0.00271925	2.63854	2.62549	26	29	0.121	0.22	RNAseq
OPGS008811	TYK2	0.00273643	3.77757	3.76643	19	19	0.094	0.257	RNAseq
OPGS014681	SLC24A1	0.00273978	-0.247346	-0.251794	1	1	0.018	0.118	RNAseq
OPGS007221	TXNRD1	0.00275848	-0.395775	-0.382213	80	80	0.142	0.361	RNAseq
OPGS015068	ZBTB41	0.00276726	-0.059903	-0.0647417	2	2	0.015	0.115	RNAseq
OPGS015860	AC017083.2	0.0027674	0.249225	0.245303	1	1	0.011	0.091	RNAseq
OPGS009480	RAB24	0.00277609	0.288447	0.299195	18	18	0.08	0.276	RNAseq
OPGS009588		0.00278041	-1.07241	-1.08236	8	8	0.077	0.263	RNAseq
OPGS014296	MTMR12	0.00279483	0.746336	0.7411	9	9	0.02	0.117	RNAseq
OPGS001311	EPHB3	0.00279926	-0.00736074	-0.00370118	35	69	0.033	0.179	Somalogic	Ephrin type-B receptor 3
OPGS009165	SELENOK	0.00280295	1.28765	1.29807	24	24	0.086	0.284	RNAseq
OPGS007461	ITPRIP	0.00280788	-6.41418	-6.40175	36	37	0.133	0.356	RNAseq
OPGS011926	FANCG	0.00282799	-1.9539	-1.96144	10	10	0.042	0.163	RNAseq
OPGS011105	ALG10	0.00283595	-0.0967109	-0.104902	33	33	0.052	0.227	RNAseq
OPGS010283	PCCA	0.00284868	1.68609	1.69431	31	35	0.064	0.219	RNAseq
OPGS016570	CYSTM1	0.00288848	-0.193464	-0.196394	1	1	0.008	0.086	RNAseq
OPGS000410	HTATIP2	0.00291129	-0.604965	-0.61839	63	64	0.136	0.328	Somalogic	Oxidoreductase HTATIP2
OPGS010786	INPP1	0.00292288	1.28719	1.29575	12	12	0.057	0.205	RNAseq
OPGS012481	PPAT	0.0029382	-1.06997	-1.06357	7	7	0.036	0.178	RNAseq
OPGS011863	ACTN4	0.00295325	0.0035029	0.0107174	10	10	0.043	0.19	RNAseq
OPGS013221	ADAMTSL4-AS2	0.00295863	-0.718053	-0.724035	8	8	0.029	0.159	RNAseq
OPGS000078	CCL15	0.00297896	-2.82237	-2.84349	67	83	0.409	0.521	Somalogic	C-C motif chemokine 15
OPGS001513	TOMM20L	0.00299741	0.617054	0.622429	3	3	0.025	0.147	Somalogic	TOMM20-like protein 1
OPGS003805	NFE2L3	0.003015	3.4757	3.45415	157	161	0.546	0.703	RNAseq
OPGS001755	GCNT2	0.00303518	-1.48106	-1.48594	2	2	0.018	0.111	Somalogic	N-acetyllactosaminide beta-1,6-N-acetylglucosaminyl-transferase, isoform C
OPGS007120	COX11	0.00304364	-0.321952	-0.337275	17	18	0.147	0.376	RNAseq
OPGS005925	ICAM1	0.00305578	-1.38272	-1.36708	43	45	0.207	0.446	RNAseq
OPGS013472	STAT1	0.00307489	0.341932	0.336068	4	4	0.027	0.158	RNAseq
OPGS013393	BTBD19	0.00310079	1.64969	1.64417	6	7	0.027	0.135	RNAseq
OPGS007589	SERPINE1	0.00311418	0.948499	0.961505	30	30	0.129	0.351	RNAseq
OPGS012188	AC104964.1	0.00312757	1.30792	1.31564	14	14	0.039	0.156	RNAseq
OPGS010832	AHSP	0.00314056	2.18222	2.17499	17	19	0.056	0.198	RNAseq
OPGS001436	BMP7	0.00314354	0.0738796	0.0795407	6	6	0.028	0.165	Somalogic	Bone morphogenetic protein 7
OPGS004488	GTF2H2B	0.00315308	-1.5694	-1.59118	11	15	0.357	0.603	RNAseq
OPGS008143	AP001033.3	0.00315356	1.21856	1.2067	25	25	0.111	0.323	RNAseq
OPGS000150	KLKB1	0.00315369	0.0200553	0.0387097	91	93	0.284	0.53	Somalogic	Plasma kallikrein
OPGS011907	ITPKB	0.00316056	0.342974	0.349333	14	15	0.042	0.192	RNAseq
OPGS010829	GPLD1	0.00318296	-0.131874	-0.123547	11	11	0.056	0.236	RNAseq
OPGS015864	IFFO1	0.00318594	0.643498	0.646881	1	1	0.011	0.06	RNAseq
OPGS006317	ULBP3	0.0032039	0.547609	0.562261	29	30	0.185	0.42	RNAseq
OPGS006354	RALGDS	0.00323419	0.0542989	0.0701789	32	33	0.183	0.438	RNAseq
OPGS006287	PON2	0.00324108	1.68506	1.66921	46	47	0.187	0.394	RNAseq
OPGS010298	LGALSL	0.00324846	-4.77692	-4.77011	10	13	0.064	0.217	RNAseq
OPGS015356	USPL1	0.00326593	0.189919	0.194238	3	3	0.014	0.098	RNAseq
OPGS007483	STARD3	0.00326928	2.76862	2.7557	51	52	0.133	0.331	RNAseq
OPGS010176	TULP4	0.00327101	0.272908	0.280785	20	22	0.066	0.252	RNAseq
OPGS004094	SMDT1	0.00329171	18.4028	18.4223	103	117	0.439	0.679	RNAseq
OPGS011505	RASSF5	0.0033275	-1.34813	-1.35562	4	4	0.047	0.164	RNAseq
OPGS001060	SEPTIN11	0.00333183	-0.355615	-0.348676	10	11	0.049	0.215	Somalogic	Septin-11
OPGS005961	TJP2	0.00333433	-1.91836	-1.9023	45	46	0.206	0.45	RNAseq
OPGS014832	SLC6A4	0.00333559	0.634518	0.630162	2	2	0.017	0.123	RNAseq
OPGS012940	MAP3K12	0.00334379	1.46633	1.46016	6	6	0.031	0.146	RNAseq
OPGS005971	NSUN4	0.00336795	-6.87184	-6.85536	39	41	0.205	0.45	RNAseq
OPGS013452	SEC61A1	0.00337384	-1.03758	-1.04315	3	3	0.027	0.158	RNAseq
OPGS005055	KRTAP5-AS1	0.00340357	-2.22393	-2.24345	97	99	0.281	0.528	RNAseq
OPGS012510	KLRF1	0.00342759	0.0372604	0.0304414	10	10	0.036	0.182	RNAseq
OPGS005337	AKIRIN1	0.00344407	1.56546	1.54681	55	55	0.253	0.469	RNAseq
OPGS007123	LMF2	0.003502	0.161375	0.146814	37	37	0.147	0.383	RNAseq
OPGS013619	LRBA	0.00352478	0.426955	0.422409	12	13	0.025	0.153	RNAseq
OPGS009783	CRK	0.00354206	1.86081	1.85233	18	20	0.073	0.256	RNAseq
OPGS012009	MAFF	0.003544	-1.42936	-1.42168	7	7	0.041	0.198	RNAseq
OPGS006853	ATP5MC3	0.00359466	-2.88123	-2.89497	52	52	0.158	0.37	RNAseq
OPGS006886	AC016727.1	0.00361447	-7.12359	-7.11134	51	52	0.156	0.309	RNAseq
OPGS013195	AC107871.1	0.00365772	-1.00168	-1.00776	3	3	0.029	0.165	RNAseq
OPGS008518	IL11RA	0.00367844	-7.77091	-7.76177	25	26	0.101	0.222	RNAseq
OPGS016792	SUGT1P3	0.0036856	0.157451	0.154397	1	1	0.008	0.091	RNAseq
OPGS011421	ITGAL	0.00372536	-0.031469	-0.0231571	9	9	0.048	0.21	RNAseq
OPGS001019	XRCC4	0.00377884	-0.151771	-0.159511	20	22	0.052	0.21	Somalogic	DNA repair protein XRCC4
OPGS001466	POLR1C	0.00380013	0.620547	0.626104	4	4	0.027	0.15	Somalogic	DNA-directed RNA polymerases I and III subunit RPAC1
OPGS012588	SLC3A2	0.00380393	1.05485	1.06127	8	8	0.035	0.173	RNAseq
OPGS011270	SLC6A19	0.00380561	0.648561	0.655949	6	6	0.05	0.212	RNAseq
OPGS009095	RAB33B	0.00380875	3.96175	3.94979	17	19	0.088	0.292	RNAseq
OPGS000680	KLRC3	0.00382082	1.47009	1.46032	15	15	0.087	0.255	Somalogic	NKG2-E type II integral membrane protein
OPGS015892	AC015813.1	0.00388395	-0.253658	-0.250326	3	3	0.011	0.092	RNAseq
OPGS004201	IPO8	0.00392492	-0.51858	-0.541742	92	94	0.411	0.629	RNAseq
OPGS011712	DNAJC3	0.00394318	2.34013	2.34714	8	8	0.045	0.188	RNAseq
OPGS007829	KRT8P46	0.00394639	1.26101	1.24789	32	34	0.121	0.333	RNAseq
OPGS013098	CLN3	0.00400038	0.311394	0.306766	4	5	0.03	0.161	RNAseq
OPGS000440	IGLL1	0.00400362	0.125861	0.116177	9	19	0.13	0.343	Somalogic	Immunoglobulin lambda-like polypeptide 1
OPGS010612	TECR	0.00400886	0.300323	0.308896	2	2	0.059	0.237	RNAseq
OPGS012787	FURIN	0.00403783	-0.0133528	-0.00670493	5	5	0.033	0.179	RNAseq
OPGS004583	VCL	0.00405452	2.66067	2.68014	59	79	0.342	0.537	RNAseq
OPGS014258	AL109811.2	0.00407392	0.130442	0.12553	2	2	0.021	0.135	RNAseq
OPGS002682	MB	0.00408067	0.0696786	0.066801	2	2	0.007	0.084	Olink	Myoglobin
OPGS013642	GPSM3	0.00411533	-0.538989	-0.544177	5	5	0.025	0.143	RNAseq
OPGS004941	AP001816.1	0.00411557	1.61715	1.59688	62	68	0.294	0.512	RNAseq
OPGS014256	AL136441.1	0.00412262	-0.112371	-0.108134	4	4	0.021	0.134	RNAseq
OPGS005459	HMGN4	0.00413835	11.6337	11.6154	49	53	0.242	0.438	RNAseq
OPGS011007	RP11-347C12.2	0.00415916	0.751324	0.744854	13	15	0.054	0.223	RNAseq
OPGS001905	MPZ	0.0041753	-0.221928	-0.226571	1	1	0.015	0.12	Somalogic	Myelin protein P0
OPGS010392	TYSND1	0.00418431	-1.47794	-1.48617	9	9	0.063	0.266	RNAseq
OPGS014202	RALY	0.00420665	-0.150804	-0.156157	2	2	0.021	0.145	RNAseq
OPGS013042	IGF2R	0.00421942	-0.863273	-0.868393	14	15	0.03	0.165	RNAseq
OPGS015213	HNRNPA0	0.00424042	-0.941425	-0.945564	2	2	0.015	0.118	RNAseq
OPGS014355	VPS51	0.00424581	2.09861	2.09306	4	4	0.02	0.118	RNAseq
OPGS010341	PDGFC	0.00427198	0.47156	0.481865	24	25	0.064	0.247	RNAseq
OPGS005950	SKP1	0.00435017	-4.06467	-4.07979	48	49	0.206	0.319	RNAseq
OPGS007947	MELTF	0.00436085	1.78961	1.80161	29	29	0.117	0.338	RNAseq
OPGS015915	PIK3CD	0.00437542	-0.112803	-0.10937	2	2	0.011	0.097	RNAseq
OPGS010991	ALDH4A1	0.00438327	1.57911	1.58759	11	11	0.054	0.207	RNAseq
OPGS007891	COL10A1	0.00441921	-4.03953	-4.05108	25	25	0.119	0.232	RNAseq
OPGS009445	NT5C3A	0.00444852	-0.120074	-0.129206	13	16	0.081	0.264	RNAseq
OPGS013656	PTMA	0.00445365	2.29646	2.29057	10	10	0.025	0.131	RNAseq
OPGS001331	DNAJC30	0.00447832	0.061022	0.0568816	8	12	0.032	0.087	Somalogic	DnaJ homolog subfamily C member 30
OPGS014814	DPY30	0.00448554	-0.516691	-0.512057	18	18	0.017	0.125	RNAseq
OPGS008302	UQCRHL	0.00449607	9.3104	9.31914	18	24	0.107	0.258	RNAseq
OPGS005240	ZNF525	0.00449935	0.0967661	0.0789365	50	54	0.262	0.508	RNAseq
OPGS010438	AC102953.2	0.00450164	-0.821434	-0.823878	2	9	0.062	0.169	RNAseq
OPGS013446	STX11	0.00450801	-0.703933	-0.709522	9	9	0.027	0.15	RNAseq
OPGS009245	PHF24	0.00455829	0.542495	0.553034	20	20	0.084	0.235	RNAseq
OPGS008960	KLHDC8B	0.00456735	2.16324	2.17369	43	43	0.091	0.221	RNAseq
OPGS005799	CYP4F22	0.00457012	-3.95862	-3.94404	30	33	0.215	0.357	RNAseq
OPGS011415	TRPM2	0.00458407	-1.38101	-1.37422	5	5	0.048	0.205	RNAseq
OPGS014759	SMAD1	0.00460262	0.239167	0.243211	3	3	0.017	0.129	RNAseq
OPGS008523	AC008937.3	0.00464757	-2.6769	-2.66568	25	25	0.101	0.308	RNAseq
OPGS015454	P2RX5-TAX1BP3	0.00465496	0.884629	0.880981	2	2	0.013	0.104	RNAseq
OPGS016055	BCL9L	0.00465775	-0.0942341	-0.0907551	2	2	0.01	0.085	RNAseq
OPGS008545	GPRIN3	0.00466846	-0.0999224	-0.111126	21	21	0.1	0.308	RNAseq
OPGS003871	ERV3-1	0.00467189	-1.06067	-1.04262	158	178	0.52	0.72	RNAseq
OPGS000481	RRM1	0.00468606	-0.387175	-0.400312	14	22	0.121	0.34	Somalogic	Ribonucleoside-diphosphate reductase large subunit
OPGS000790	LAMA4	0.00469409	-0.568634	-0.577394	20	22	0.074	0.267	Somalogic	Laminin subunit alpha-4
OPGS014557	PIK3CD-AS1	0.00470449	-0.344137	-0.348365	5	5	0.018	0.127	RNAseq
OPGS001718	CD274	0.0047082	0.213542	0.210361	1	2	0.019	0.144	Somalogic	Programmed cell death 1 ligand 1
OPGS013004	E2F4	0.00471767	1.37163	1.36552	6	6	0.031	0.154	RNAseq
OPGS010907	TXNRD3	0.0047299	2.43254	2.42465	24	24	0.055	0.192	RNAseq
OPGS009176	RP3-477M7.5	0.00473162	-0.953497	-0.945465	25	34	0.086	0.285	RNAseq
OPGS004136	IFNAR2	0.00481021	1.48269	1.50584	41	43	0.427	0.656	RNAseq
OPGS002530	TFF3	0.00485393	0.0765895	0.0829638	273	352	0.067	0.215	Olink	Trefoil factor 3
OPGS011562	NGRN	0.0048549	-0.100959	-0.0985004	1	2	0.046	0.155	RNAseq
OPGS012718	LAT	0.00485539	-1.52482	-1.52165	2	5	0.033	0.103	RNAseq
OPGS005730	PILRB	0.00487317	-17.3628	-17.3761	42	57	0.22	0.464	RNAseq
OPGS013408	USP43	0.00487785	0.198014	0.19272	2	2	0.027	0.145	RNAseq
OPGS004339	PPP2R3C	0.00490972	21.8643	21.8465	65	85	0.382	0.565	RNAseq
OPGS001721	CHGA	0.00492161	-0.0601358	-0.0648417	8	8	0.019	0.115	Somalogic	Chromogranin-A
OPGS010564	CEACAM6	0.00492656	0.186314	0.192547	14	18	0.06	0.23	RNAseq
OPGS007769	FPR3	0.00495268	0.774516	0.762016	25	26	0.123	0.34	RNAseq
OPGS008478	MT1X	0.00495828	-0.512572	-0.524057	10	10	0.102	0.273	RNAseq
OPGS002540	PLXNB1	0.00496108	0.443796	0.451879	23	25	0.062	0.244	Olink	Plexin-B1
OPGS006238	COMMD10	0.00496516	-2.02131	-2.03717	90	92	0.19	0.402	RNAseq
OPGS007837	MTURN	0.00497497	-3.19817	-3.1871	21	23	0.121	0.336	RNAseq
OPGS012050	RABL2B	0.00498702	-3.8658	-3.87271	7	7	0.041	0.155	RNAseq
OPGS008263	USP47	0.00500369	0.135702	0.146774	33	33	0.107	0.325	RNAseq
OPGS004135	AP1M2	0.0050181	-9.87232	-9.8509	94	100	0.427	0.636	RNAseq
OPGS013646	ZNF76	0.00505155	0.566562	0.561134	4	4	0.025	0.141	RNAseq
OPGS010172	CCDC6	0.00508645	0.227673	0.21925	34	34	0.066	0.255	RNAseq
OPGS001393	LMAN2L	0.00509914	0.0338766	0.0400049	7	7	0.029	0.181	Somalogic	VIP36-like protein
OPGS002481	FLRT2	0.00510781	0.390927	0.378933	57	61	0.126	0.342	Olink	Leucine-rich repeat transmembrane protein FLRT2
OPGS012734	ERLEC1	0.00510859	2.28554	2.29163	7	7	0.033	0.145	RNAseq
OPGS015672	BTG3	0.00514134	0.157784	0.154084	1	1	0.012	0.104	RNAseq
OPGS001405	SYNCRIP	0.00514398	0.572806	0.578533	6	13	0.029	0.153	Somalogic	Heterogeneous nuclear ribonucleoprotein Q
OPGS012289	UFSP1	0.00515759	0.0179958	0.0108884	7	7	0.038	0.17	RNAseq
OPGS012611	EIF3D	0.00517747	0.57404	0.579985	3	3	0.034	0.15	RNAseq
OPGS012788	CCDC86	0.00518236	-0.20597	-0.211538	8	8	0.033	0.158	RNAseq
OPGS013257	TAPBP	0.00524083	2.75665	2.7503	6	6	0.029	0.101	RNAseq
OPGS007170	AC105749.1	0.00525558	-0.998545	-1.01113	37	38	0.145	0.366	RNAseq
OPGS006462	PTGER4	0.00526876	1.13249	1.14619	109	114	0.177	0.407	RNAseq
OPGS008404	APRT	0.00529405	4.3676	4.37857	36	36	0.104	0.263	RNAseq
OPGS004438	PAX8-AS1	0.00530255	9.21203	9.23266	83	86	0.366	0.58	RNAseq
OPGS007873	PAFAH1B1	0.00531487	4.32629	4.31527	15	17	0.119	0.291	RNAseq
OPGS005532	AC004076.2	0.00531511	2.81889	2.80235	53	55	0.235	0.483	RNAseq
OPGS012443	MXD4	0.00538685	0.00953827	0.0159751	4	4	0.036	0.179	RNAseq
OPGS001273	ETHE1	0.00540622	-0.100489	-0.106011	4	5	0.035	0.162	Somalogic	Persulfide dioxygenase ETHE1, mitochondrial
OPGS001257	GCG	0.00540706	-0.0228312	-0.0291394	7	7	0.036	0.179	Somalogic	Glucagon
OPGS004077	HDHD3	0.00541196	5.41082	5.43259	26	30	0.443	0.605	RNAseq
OPGS001059	ITIH4	0.00543357	-0.400018	-0.407309	12	12	0.049	0.202	Somalogic	Inter-alpha-trypsin inhibitor heavy chain H4
OPGS013660	CD8A	0.00544249	0.323364	0.318814	3	4	0.025	0.147	RNAseq
OPGS012043	RPS6KB1	0.00547479	-0.834157	-0.827057	13	13	0.041	0.187	RNAseq
OPGS006704	RCC1	0.00551033	-6.19636	-6.20904	29	37	0.165	0.241	RNAseq
OPGS005363	FAM177A1	0.0055223	-2.62625	-2.64197	46	52	0.25	0.492	RNAseq
OPGS004375	FGFR2	0.0055304	1.14378	1.1639	44	52	0.375	0.617	RNAseq
OPGS008750	GABPB1-IT1	0.00555083	0.919967	0.930663	11	11	0.095	0.307	RNAseq
OPGS006174	YJU2	0.00555105	0.418222	0.432708	18	21	0.193	0.421	RNAseq
OPGS006888	GTF2H2	0.00555937	-2.65937	-2.6691	15	29	0.156	0.392	RNAseq
OPGS009100	PDHX	0.00560525	-1.23156	-1.22196	28	28	0.088	0.29	RNAseq
OPGS010785	RHBDD3	0.00562179	2.09608	2.0878	33	34	0.057	0.166	RNAseq
OPGS001071	SERPINA11	0.00564487	0.129309	0.12219	8	8	0.047	0.218	Somalogic	Serpin A11
OPGS004563	DTNBP1	0.0056499	-0.235213	-0.215993	71	78	0.343	0.556	RNAseq
OPGS000888	PRKCSH	0.00566441	0.225023	0.233627	15	15	0.064	0.24	Somalogic	Glucosidase 2 subunit beta
OPGS013119	PIDD1	0.00566791	-1.17051	-1.165	2	3	0.03	0.134	RNAseq
OPGS009625	TRMT1L	0.0056973	4.59761	4.58866	21	24	0.076	0.152	RNAseq
OPGS012519	LINC00544	0.00571907	-0.247269	-0.241051	17	17	0.035	0.175	RNAseq
OPGS007983	CPEB2	0.0057226	-0.313423	-0.301136	36	37	0.116	0.33	RNAseq
OPGS010494	NTAN1	0.00572471	-0.960753	-0.952671	9	9	0.061	0.242	RNAseq
OPGS002121	EDA2R	0.00573043	0.0501284	0.0535238	3	3	0.011	0.098	Somalogic	Tumor necrosis factor receptor superfamily member 27
OPGS012768	HMGA1	0.00573143	-1.799	-1.79325	16	17	0.033	0.109	RNAseq
OPGS009536	ABHD4	0.00574175	-0.534747	-0.544359	13	13	0.078	0.269	RNAseq
OPGS016713	CPLANE1	0.00574402	0.722862	0.720267	1	1	0.008	0.059	RNAseq
OPGS007385	SP140L	0.00575034	0.0106397	0.0227787	28	29	0.136	0.353	RNAseq
OPGS003588	LIPA	0.00578287	-2.15726	-2.18578	72	74	0.703	0.85	RNAseq
OPGS012891	ZNF823	0.00580267	-2.83454	-2.82845	4	4	0.032	0.14	RNAseq
OPGS004083	WDR6	0.0058039	-2.6581	-2.6371	96	111	0.442	0.667	RNAseq
OPGS006538	TMEM170B	0.0058059	-1.96608	-1.9519	45	46	0.173	0.4	RNAseq
OPGS000904	CDC42BPA	0.00581279	-0.605134	-0.597808	13	27	0.063	0.245	Somalogic	Serine/threonine-protein kinase MRCK alpha
OPGS012199	MPHOSPH8	0.00583203	-0.33189	-0.338446	38	40	0.039	0.173	RNAseq
OPGS012268	AC087501.4	0.00584153	0.612611	0.606985	5	7	0.038	0.167	RNAseq
OPGS004168	TMEM45B	0.00585651	2.48804	2.46647	86	100	0.418	0.597	RNAseq
OPGS014668	AP002813.1	0.00588475	0.758213	0.762507	5	5	0.018	0.117	RNAseq
OPGS000522	SLC14A2	0.00589439	-0.792571	-0.781039	22	27	0.113	0.278	Somalogic	Urea transporter 2
OPGS009531	LTBR	0.00593717	1.13507	1.12606	7	9	0.078	0.266	RNAseq
OPGS010402	MDH1	0.00596099	-0.764905	-0.756401	22	23	0.062	0.23	RNAseq
OPGS007954	LINC00910	0.00597633	-11.2052	-11.1943	26	27	0.117	0.306	RNAseq
OPGS003742	AHI1	0.00598975	0.388564	0.413938	124	149	0.573	0.729	RNAseq
OPGS011950	AC011476.3	0.00599397	0.969876	0.964583	4	7	0.042	0.203	RNAseq
OPGS002569	TNFRSF13B	0.00599797	-0.162982	-0.156381	9	10	0.043	0.176	Olink	Tumor necrosis factor receptor superfamily member 13B
OPGS005827	SBK1	0.00605246	0.546323	0.537577	26	36	0.213	0.46	RNAseq
OPGS011498	LINC02018	0.00605861	0.849357	0.844523	5	8	0.047	0.21	RNAseq
OPGS004369	SLFN5	0.00607509	-5.98282	-6.00278	52	63	0.376	0.618	RNAseq
OPGS007855	ZNF367	0.00608188	-1.29025	-1.3019	28	28	0.12	0.333	RNAseq
OPGS014656	STK38	0.00608888	-0.849421	-0.85306	1	1	0.018	0.1	RNAseq
OPGS000487	SEPTIN10	0.00611224	1.74406	1.73179	26	27	0.12	0.334	Somalogic	Septin-10
OPGS011369	EIF3B	0.00611325	-0.0906531	-0.0830386	8	8	0.049	0.218	RNAseq
OPGS000184	GNLY	0.00612193	-1.4409	-1.45795	96	114	0.253	0.509	Somalogic	Granulysin
OPGS013513	PRR7	0.00613289	1.26135	1.26655	3	4	0.026	0.145	RNAseq
OPGS010394	BBIP1	0.0061706	-0.26679	-0.274288	12	14	0.063	0.233	RNAseq
OPGS009455	PRDM8	0.00617249	1.39722	1.38771	24	24	0.08	0.275	RNAseq
OPGS007178	IL10	0.00619775	0.44133	0.454119	34	37	0.144	0.352	RNAseq
OPGS011634	SNHG1	0.00621369	-2.63338	-2.62626	8	8	0.046	0.138	RNAseq
OPGS007387	C6orf62	0.00626135	-1.74441	-1.73233	14	15	0.136	0.376	RNAseq
OPGS012070	P4HTM	0.00626394	0.324837	0.317944	9	9	0.04	0.195	RNAseq
OPGS014679	RP11-686D22.3	0.00627291	0.269953	0.274735	4	4	0.018	0.129	RNAseq
OPGS013681	LINGO3	0.00629687	0.183098	0.187858	2	3	0.025	0.136	RNAseq
OPGS011675	AC005562.1	0.00631597	-1.74026	-1.74701	9	10	0.045	0.129	RNAseq
OPGS007498	AC064805.2	0.00633165	-2.04642	-2.05838	12	12	0.132	0.261	RNAseq
OPGS014626	ADAMDEC1	0.00633718	0.658133	0.662496	3	3	0.018	0.102	RNAseq
OPGS002510	BMP6	0.006347	-0.693063	-0.70306	43	44	0.085	0.297	Olink	Bone morphogenetic protein 6
OPGS014615	CYTH3	0.0063603	0.814844	0.810802	2	2	0.018	0.105	RNAseq
OPGS008703	NFKB1	0.00638685	0.948534	0.959049	29	32	0.096	0.306	RNAseq
OPGS005982	LINC02021	0.00641605	-6.85148	-6.8376	73	77	0.204	0.461	RNAseq
OPGS004692	UBA6-AS1	0.00641913	3.26366	3.28262	30	32	0.325	0.482	RNAseq
OPGS015799	CUX2	0.00643922	0.130665	0.131743	1	3	0.011	0.111	RNAseq
OPGS006631	PLEKHG3	0.00644664	-1.70571	-1.71784	39	41	0.169	0.366	RNAseq
OPGS006444	CHN1	0.00644832	0.0994408	0.114098	33	37	0.178	0.412	RNAseq
OPGS001292	KLK6	0.00646855	1.05373	1.05878	4	5	0.034	0.178	Somalogic	Kallikrein-6
OPGS005089	ABHD17C	0.00647096	-3.25121	-3.23316	68	72	0.277	0.51	RNAseq
OPGS009089	TOB1	0.00648079	-0.237202	-0.227132	21	21	0.088	0.291	RNAseq
OPGS014250	RP11-632F7.1	0.00653445	-0.3152	-0.310157	4	4	0.021	0.126	RNAseq
OPGS014734	AC018628.2	0.00655074	-0.0559354	-0.0605472	6	6	0.017	0.126	RNAseq
OPGS011038	ELMO3	0.00656143	-5.51719	-5.50872	15	15	0.053	0.176	RNAseq
OPGS008629	SMC4	0.00659957	0.756413	0.766521	38	38	0.098	0.305	RNAseq
OPGS014150	TMEM184A	0.00660731	-0.0468884	-0.0512317	3	3	0.021	0.119	RNAseq
OPGS007969	SPATA2L	0.0066221	-0.733342	-0.722467	29	30	0.116	0.335	RNAseq
OPGS003878	GET1	0.00664193	-15.9636	-15.9407	87	92	0.517	0.738	RNAseq
OPGS013955	PSPH	0.00675545	-2.80869	-2.81266	4	4	0.023	0.094	RNAseq
OPGS008084	SNED1	0.0067595	-3.28389	-3.2723	24	24	0.113	0.248	RNAseq
OPGS001345	GFRA1	0.00678326	0.0177558	0.0239041	13	13	0.031	0.175	Somalogic	GDNF family receptor alpha-1
OPGS000203	GSK3A|GSK3B	0.00678519	-1.22622	-1.21019	69	76	0.233	0.426	Somalogic	Glycogen synthase kinase-3 alpha/beta
OPGS012087	RASSF3	0.00681896	-0.171965	-0.178605	12	12	0.04	0.189	RNAseq
OPGS008777	SPEF2	0.00682587	1.40129	1.39111	26	27	0.095	0.297	RNAseq
OPGS011952	ETV5	0.00685932	0.0668838	0.0736642	14	14	0.042	0.172	RNAseq
OPGS004133	BLVRA	0.00691469	-1.31294	-1.33498	74	77	0.427	0.648	RNAseq
OPGS005289	UBA7	0.00692211	-1.85829	-1.84259	62	67	0.258	0.517	RNAseq
OPGS015621	DAXX	0.00694231	0.611907	0.608723	1	1	0.012	0.103	RNAseq
OPGS012661	SNX10	0.00695556	-1.88283	-1.87683	9	9	0.034	0.162	RNAseq
OPGS016150	CISD2	0.00696913	0.860093	0.857046	3	3	0.01	0.079	RNAseq
OPGS016995	AL133523.1	0.00698942	1.21943	1.21709	1	1	0.007	0.029	RNAseq
OPGS005415	S100PBP	0.00699724	0.107039	0.123575	26	32	0.245	0.461	RNAseq
OPGS007633	CISD1	0.00703892	6.34597	6.35628	18	21	0.128	0.329	RNAseq
OPGS016716	MRPS22	0.00707442	0.0932773	0.0905535	1	1	0.008	0.083	RNAseq
OPGS006294	AIFM3	0.00708392	-0.118439	-0.126532	4	17	0.187	0.406	RNAseq
OPGS010333	RASGEF1A	0.00708691	-0.0120296	-0.020008	13	15	0.064	0.245	RNAseq
OPGS009689	IQSEC1	0.00709206	0.641384	0.650513	14	14	0.075	0.273	RNAseq
OPGS015933	GATD1	0.00712989	0.330628	0.327541	1	1	0.011	0.091	RNAseq
OPGS009934	IGSF22	0.00714053	0.706694	0.715626	9	9	0.07	0.256	RNAseq
OPGS007324	MPND	0.0071703	-0.719413	-0.731201	14	19	0.138	0.373	RNAseq
OPGS015535	CALY	0.00717259	0.275075	0.278737	6	6	0.013	0.107	RNAseq
OPGS014301	RRAS	0.00717906	1.80598	1.81054	3	3	0.02	0.115	RNAseq
OPGS016566	PMF1	0.00718593	-0.966594	-0.963252	2	2	0.008	0.045	RNAseq
OPGS011397	LINC01191	0.00720481	0.327828	0.321374	6	7	0.048	0.19	RNAseq
OPGS004050	STEAP3	0.00722704	-0.644778	-0.622545	70	74	0.449	0.674	RNAseq
OPGS000802	MED4	0.00723838	-0.675446	-0.684421	18	18	0.073	0.262	Somalogic	Mediator of RNA polymerase II transcription subunit 4
OPGS013690	KLF13	0.00724397	-0.158811	-0.163501	3	4	0.025	0.146	RNAseq
OPGS012692	TUBE1	0.00732415	0.591851	0.586619	8	9	0.034	0.175	RNAseq
OPGS008282	PRR29	0.00734631	-1.37621	-1.36544	20	21	0.107	0.28	RNAseq
OPGS007935	NOL10	0.00739781	2.87366	2.86289	23	24	0.117	0.321	RNAseq
OPGS012454	SDHDP6	0.00741155	-0.973772	-0.969352	3	5	0.036	0.164	RNAseq
OPGS005698	XPNPEP1	0.00744338	-2.25199	-2.26747	94	96	0.221	0.458	RNAseq
OPGS007247	AC127502.2	0.00744937	3.41145	3.40098	27	33	0.142	0.324	RNAseq
OPGS016379	UBE2L6	0.00747121	-0.00688848	-0.0096113	2	2	0.009	0.099	RNAseq
OPGS015919	AC012368.2	0.00750282	-1.83851	-1.84226	3	3	0.011	0.071	RNAseq
OPGS011441	PLEKHO1	0.0075477	-1.3707	-1.36458	13	15	0.048	0.187	RNAseq
OPGS001464	GP1BA	0.00755295	0.219307	0.213607	7	7	0.027	0.146	Somalogic	Platelet glycoprotein Ib alpha chain
OPGS008852	H2AC8	0.00757405	3.34801	3.33801	25	26	0.093	0.283	RNAseq
OPGS004948	AC007686.4	0.00757831	-0.592051	-0.574433	55	58	0.293	0.522	RNAseq
OPGS004342	RNF216P1	0.00761053	4.54723	4.52687	95	96	0.381	0.602	RNAseq
OPGS006714	DUS2	0.00761894	-9.43114	-9.4179	34	35	0.164	0.383	RNAseq
OPGS001110	HPGD	0.0076277	-0.727086	-0.719922	11	11	0.045	0.184	Somalogic	15-hydroxyprostaglandin dehydrogenase [NAD(+)]
OPGS013548	RXRA	0.00763034	-0.075506	-0.0797904	6	8	0.026	0.142	RNAseq
OPGS005464	TSPAN33	0.00764853	0.302452	0.28627	29	29	0.242	0.461	RNAseq
OPGS003982	MKNK1	0.00765912	-1.78516	-1.80669	74	77	0.469	0.649	RNAseq
OPGS011637	DHDDS	0.00767737	0.791135	0.798338	8	8	0.045	0.203	RNAseq
OPGS006860	GBP1P1	0.00768699	1.03914	1.02569	32	33	0.157	0.305	RNAseq
OPGS002397	CCL15	0.00768724	-2.04284	-2.05902	61	76	0.36	0.432	Olink	C-C motif chemokine 15
OPGS008160	SLC48A1	0.00770771	-0.992795	-0.982103	23	23	0.11	0.318	RNAseq
OPGS007758	PEAR1	0.00770823	0.0560683	0.0446952	30	31	0.124	0.332	RNAseq
OPGS005066	LFNG	0.00771616	2.2323	2.21568	52	56	0.28	0.453	RNAseq
OPGS007136	HS3ST3B1	0.0077623	-2.12427	-2.13503	21	25	0.146	0.335	RNAseq
OPGS003755	CASP7	0.0077757	0.566434	0.54182	123	129	0.569	0.761	RNAseq
OPGS012028	HLA-DQB1-AS1	0.00783575	0.192366	0.186911	6	8	0.041	0.186	RNAseq
OPGS012161	BMT2	0.00792297	0.694636	0.699774	10	11	0.04	0.141	RNAseq
OPGS001350	STAB2	0.00794286	-0.218304	-0.212986	2	2	0.031	0.139	Somalogic	Stabilin-2
OPGS007477		0.00794642	-8.08759	-8.07658	30	34	0.133	0.158	RNAseq
OPGS001476	IL13RA1	0.00801604	0.232912	0.236699	3	4	0.026	0.156	Somalogic	Interleukin-13 receptor subunit alpha-1
OPGS012702	AC092803.1	0.00806506	-1.18281	-1.18872	7	7	0.034	0.174	RNAseq
OPGS015359	SMARCC2	0.00806746	-1.25634	-1.25959	2	2	0.014	0.084	RNAseq
OPGS014594	SOS1-IT1	0.00809504	0.134799	0.139195	13	13	0.018	0.101	RNAseq
OPGS008351	LIN52	0.00813386	-5.13682	-5.127	21	22	0.105	0.315	RNAseq
OPGS014434	CRB2	0.00813526	-0.130103	-0.125563	6	6	0.019	0.136	RNAseq
OPGS008570	LPCAT2	0.00813783	1.33371	1.34404	14	15	0.099	0.241	RNAseq
OPGS007980	ATP5F1C	0.00814904	0.577874	0.566706	27	28	0.116	0.342	RNAseq
OPGS014799	FCRL1	0.00822104	0.484215	0.480453	2	2	0.017	0.116	RNAseq
OPGS000528	RNASE4	0.00822968	0.330074	0.341846	30	32	0.112	0.287	Somalogic	Ribonuclease 4
OPGS013650	PTGES3P1	0.00823953	1.54573	1.55049	5	5	0.025	0.081	RNAseq
OPGS002531	F3	0.00825431	-0.221277	-0.228992	55	64	0.066	0.247	Olink	Tissue factor
OPGS009745	SPARC	0.0082593	-1.03604	-1.02787	13	13	0.074	0.254	RNAseq
OPGS005158	DEF6	0.00826628	13.598	13.5829	72	77	0.271	0.457	RNAseq
OPGS006188	BCAS3	0.00834605	-0.327426	-0.330221	13	37	0.192	0.295	RNAseq
OPGS015191	AL139260.1	0.00835532	-0.567025	-0.563338	2	2	0.015	0.109	RNAseq
OPGS012449	DNAJB2	0.0084553	-0.283226	-0.289483	6	6	0.036	0.176	RNAseq
OPGS014416	IGHG2	0.0085173	-0.905875	-0.903394	1	2	0.02	0.107	RNAseq
OPGS005130	RIMBP2	0.00853227	-4.37846	-4.36318	46	53	0.273	0.521	RNAseq
OPGS008176	RP5-1051J4.6	0.00853665	-0.929192	-0.938062	9	11	0.11	0.307	RNAseq
OPGS006905	ITGA9	0.00856004	-2.24756	-2.26011	36	36	0.155	0.402	RNAseq
OPGS009522	PLEKHG2	0.00856237	1.4068	1.4161	26	26	0.079	0.286	RNAseq
OPGS002173	IL2RB	0.00858034	0.115711	0.112924	2	2	0.011	0.102	Somalogic	Interleukin-2 receptor subunit beta
OPGS015267	AL133342.1	0.00859648	-0.0372624	-0.0405302	5	5	0.014	0.109	RNAseq
OPGS000482	CFHR5	0.00861614	2.12105	2.13068	50	54	0.121	0.262	Somalogic	Complement factor H-related protein 5
OPGS011004	CSF2RB	0.00862201	-1.69897	-1.7052	9	11	0.054	0.221	RNAseq
OPGS014214	PRSS22	0.00863643	0.790364	0.785588	3	3	0.021	0.131	RNAseq
OPGS001586	STAT3	0.00865814	-0.0323486	-0.0295369	27	47	0.023	0.139	Somalogic	Signal transducer and activator of transcription 3
OPGS013281	RP11-958N24.2	0.0087214	-0.213145	-0.216805	2	4	0.028	0.142	RNAseq
OPGS001367	COL6A1	0.00873499	-0.0653931	-0.0709176	22	22	0.03	0.174	Somalogic	Collagen alpha-1(VI) chain
OPGS016515	RNF208	0.00874166	0.285889	0.283325	1	1	0.009	0.077	RNAseq
OPGS012316	AL355916.1	0.00879171	-0.771556	-0.777178	26	26	0.038	0.183	RNAseq
OPGS000710	F2	0.00880512	0.148101	0.156624	24	24	0.082	0.273	Somalogic	Thrombin
OPGS007111	AC008403.3	0.00882003	1.04104	1.05357	36	37	0.147	0.37	RNAseq
OPGS014482	SLC25A15	0.00883139	0.473102	0.469698	6	7	0.019	0.132	RNAseq
OPGS006438	BST1	0.00885835	-2.95669	-2.96968	42	43	0.178	0.425	RNAseq
OPGS001004	CEL	0.0088907	-0.935113	-0.928488	10	10	0.053	0.145	Somalogic	Bile salt-activated lipase
OPGS000901	SKIL	0.00889897	-0.218019	-0.212035	10	24	0.063	0.242	Somalogic	Ski-like protein
OPGS016906	WDR54	0.00890038	1.42336	1.42558	1	1	0.007	0.054	RNAseq
OPGS012967	CCDC157	0.00890141	0.142096	0.147312	14	14	0.031	0.167	RNAseq
OPGS003594	PIGC	0.00896717	-2.84724	-2.82018	101	102	0.698	0.848	RNAseq
OPGS003848	RBM43	0.00896779	-1.86653	-1.89041	158	168	0.529	0.72	RNAseq
OPGS007683	MTMR6	0.00900021	-0.850669	-0.838459	23	25	0.126	0.316	RNAseq
OPGS000797	RAB31	0.00900979	-0.205379	-0.196416	19	22	0.073	0.208	Somalogic	Ras-related protein Rab-31
OPGS004222	KRT23	0.00902261	5.24597	5.22614	70	80	0.407	0.629	RNAseq
OPGS003825	ZBED6CL	0.009028	-1.135	-1.112	43	55	0.54	0.698	RNAseq
OPGS005025	NCKIPSD	0.00903538	3.49801	3.48214	67	72	0.284	0.524	RNAseq
OPGS000140	ZG16B	0.00908319	1.41668	1.43442	52	57	0.309	0.536	Somalogic	Zymogen granule protein 16 homolog B
OPGS005117	NPIPB12	0.00910727	3.10717	3.12428	52	55	0.275	0.52	RNAseq
OPGS001104	C1orf162	0.00918598	-0.436764	-0.443601	12	12	0.046	0.199	Somalogic	Transmembrane protein C1orf162
OPGS016385	CBR3-AS1	0.0092036	1.01026	1.00767	1	1	0.009	0.08	RNAseq
OPGS013838	EIF4G3	0.00921184	0.6581	0.662698	2	3	0.024	0.147	RNAseq
OPGS001809	PIANP	0.00921672	-0.338939	-0.334701	2	2	0.017	0.125	Somalogic	PILR alpha-associated neural protein
OPGS011350	BHLHE40	0.00924731	1.75318	1.74633	10	10	0.049	0.206	RNAseq
OPGS010841	MAP4K3-DT	0.00925307	0.373763	0.365875	14	14	0.056	0.233	RNAseq
OPGS008713	AC097504.2	0.0092641	-3.65067	-3.65929	25	26	0.096	0.283	RNAseq
OPGS007903	PACSIN2	0.00931218	-0.905381	-0.894834	19	20	0.118	0.336	RNAseq
OPGS000795	SERPINA5	0.00934927	-0.562341	-0.570918	19	19	0.074	0.259	Somalogic	Plasma serine protease inhibitor
OPGS002025	FBXL4	0.00935184	-0.0965747	-0.0945587	3	4	0.012	0.091	Somalogic	F-box/LRR-repeat protein 4
OPGS015846	CHMP5	0.00935513	-1.61172	-1.60837	2	2	0.011	0.054	RNAseq
OPGS005947	USP39	0.00936674	1.80834	1.82013	10	11	0.206	0.277	RNAseq
OPGS013352	CD2BP2	0.00937338	2.81414	2.81863	7	7	0.028	0.024	RNAseq
OPGS010831	KLF2	0.00941984	0.27045	0.277907	8	8	0.056	0.226	RNAseq
OPGS015564	NSD1	0.009428	-0.0189715	-0.0221226	3	3	0.013	0.078	RNAseq
OPGS008849	NFKB2	0.0094383	0.580097	0.589847	57	58	0.093	0.298	RNAseq
OPGS011743	SATB1	0.00944016	-0.0778086	-0.0714148	11	12	0.044	0.213	RNAseq
OPGS013385	TNRC6C	0.00945065	-0.214194	-0.209227	10	10	0.027	0.15	RNAseq
OPGS008066	PSMB8-AS1	0.00957466	6.99939	6.98851	16	17	0.114	0.288	RNAseq
OPGS015676	CCDC71	0.00959732	-0.044754	-0.0430184	1	2	0.012	0.113	RNAseq
OPGS008124	UBASH3A	0.00961261	-0.638084	-0.627883	18	18	0.112	0.329	RNAseq
OPGS001294	PXDN	0.00961689	-0.0102452	-0.0163914	9	9	0.034	0.168	Somalogic	Peroxidasin homolog
OPGS008867	TSBP1-AS1	0.0096214	5.3067	5.29665	18	25	0.093	0.288	RNAseq
OPGS014592	WDR17	0.00962679	-1.94182	-1.93808	3	4	0.018	0.094	RNAseq
OPGS005600	AC022784.1	0.00965986	-14.0039	-13.9908	106	111	0.23	0.484	RNAseq
OPGS004875	THUMPD3	0.00970227	-2.02662	-2.04378	64	68	0.301	0.529	RNAseq
OPGS012688	GJA3	0.00971197	-0.206017	-0.212006	4	4	0.034	0.179	RNAseq
OPGS015404	AC022211.3	0.00971227	2.35507	2.35169	2	2	0.014	0.086	RNAseq
OPGS005608	ABCC1	0.00971993	2.8712	2.85689	42	52	0.229	0.46	RNAseq
OPGS016492	AL022328.3	0.00977434	-0.0997309	-0.096874	1	1	0.009	0.086	RNAseq
OPGS006608	MFHAS1	0.00977628	-4.24999	-4.23814	92	95	0.17	0.399	RNAseq
OPGS005280	DEXI	0.00980117	-0.793433	-0.809227	107	108	0.258	0.499	RNAseq
OPGS006220	ODF3	0.00981897	2.31768	2.30509	24	27	0.191	0.425	RNAseq
OPGS003628	RP11-255J3.2	0.00983285	-2.33657	-2.31098	92	101	0.662	0.775	RNAseq
OPGS006640	AKR1B1	0.0098816	-2.64499	-2.63232	46	46	0.168	0.407	RNAseq
OPGS006806	KLHL9	0.0099035	1.21095	1.19843	44	49	0.16	0.314	RNAseq
OPGS016953	PSMD12	0.00991228	-1.62105	-1.62365	1	1	0.007	0.059	RNAseq
OPGS011440	LHFPL2	0.00991568	1.01044	1.00465	5	6	0.048	0.191	RNAseq
OPGS001406	KLK14	0.00992921	0.772784	0.777908	6	7	0.029	0.166	Somalogic	Kallikrein-14
OPGS008394	PDCD1	0.00992946	3.143	3.15322	18	19	0.104	0.287	RNAseq
OPGS015532	FKBP10	0.00995837	-0.393233	-0.392196	1	3	0.013	0.048	RNAseq
OPGS006388	AF117829.1	0.0100375	2.92868	2.91508	40	41	0.181	0.397	RNAseq
OPGS001333	CDK8|CCNC	0.0100408	0.306382	0.312093	5	12	0.032	0.157	Somalogic	Cyclin-dependent kinase 8:Cyclin-C complex
OPGS015855	IKZF4	0.0100432	-0.631026	-0.634254	4	4	0.011	0.086	RNAseq
OPGS008002	SNAP23	0.010047	-1.91097	-1.90125	18	24	0.116	0.321	RNAseq
OPGS012660	PHF1	0.0101689	0.468887	0.474009	15	16	0.034	0.075	RNAseq
OPGS007241	SIGLEC9	0.0102247	0.467023	0.470323	2	7	0.142	0.353	RNAseq
OPGS012336	IDH2	0.0102351	0.0849647	0.079224	5	6	0.037	0.188	RNAseq
OPGS014997	AL160400.1	0.0102898	0.659721	0.66309	5	5	0.016	0.082	RNAseq
OPGS006685	KLHL36	0.0103132	0.851261	0.837898	15	15	0.166	0.396	RNAseq
OPGS000463	TLR4|LY96	0.0103769	-0.247925	-0.238148	39	42	0.125	0.313	Somalogic	Toll-like receptor 4:Lymphocyte antigen 96 complex
OPGS009468	MS4A4A	0.0103934	-0.700417	-0.708863	20	21	0.08	0.269	RNAseq
OPGS000217	NCF2	0.0103961	-1.1314	-1.11982	33	89	0.216	0.455	Somalogic	Neutrophil cytosol factor 2
OPGS012141	FGFRL1	0.0103988	-0.00245767	0.00329251	6	6	0.04	0.186	RNAseq
OPGS003795	ABCC5	0.0104199	1.15469	1.13078	120	127	0.55	0.742	RNAseq
OPGS015687	PRKRA	0.0104302	-0.0183198	-0.0215779	3	3	0.012	0.095	RNAseq
OPGS000215	ISLR2	0.0104347	-0.401028	-0.414176	77	92	0.218	0.459	Somalogic	Immunoglobulin superfamily containing leucine-rich repeat protein 2
OPGS011301	NABP2	0.010474	1.14062	1.14619	3	6	0.05	0.142	RNAseq
OPGS013627	AL603839.3	0.010486	-1.41497	-1.41991	6	6	0.025	0.081	RNAseq
OPGS008196	AP000295.1	0.0104968	-6.54243	-6.5527	26	28	0.109	0.317	RNAseq
OPGS004784	LIPC	0.0105013	-7.61393	-7.63141	45	47	0.312	0.533	RNAseq
OPGS000382	GXYLT1	0.0105398	-1.68829	-1.67735	53	56	0.142	0.361	Somalogic	Glucoside xylosyltransferase 1
OPGS011851	PARN	0.0105901	-0.661339	-0.655322	8	10	0.043	0.187	RNAseq
OPGS012721	LINC01934	0.0105939	-1.17588	-1.17035	12	12	0.033	0.163	RNAseq
OPGS009734	AC008074.2	0.0106181	-2.26971	-2.27647	8	14	0.074	0.215	RNAseq
OPGS000699	MPO	0.0106418	1.12606	1.11662	33	37	0.085	0.238	Somalogic	Myeloperoxidase
OPGS009621	RBM47	0.0106914	0.474453	0.483151	11	11	0.077	0.281	RNAseq
OPGS001817	PIANP	0.0107329	-0.366001	-0.361683	2	2	0.017	0.133	Somalogic	PILR alpha-associated neural protein
OPGS000211	GRAMD1C	0.0107467	0.0215674	0.0360154	30	31	0.222	0.492	Somalogic	GRAM domain-containing protein 1C
OPGS006017	S100A13	0.010785	1.59756	1.61092	30	37	0.202	0.441	RNAseq
OPGS009839	MPIG6B	0.0107908	1.02062	1.01241	19	20	0.072	0.258	RNAseq
OPGS002393	SERPINA12	0.0108212	0.47586	0.456063	95	97	0.406	0.635	Olink	Serpin A12
OPGS012772	GIGYF2	0.0108215	0.00261761	0.00542796	6	9	0.033	0.175	RNAseq
OPGS010937	H4C3	0.0108429	0.00717202	0.0145702	12	12	0.055	0.235	RNAseq
OPGS015695	HSP90AB1	0.0108611	-0.0732876	-0.0756672	1	2	0.012	0.099	RNAseq
OPGS013256	SLC27A2	0.0108965	0.331333	0.336856	16	16	0.029	0.166	RNAseq
OPGS002448	IL1RL2	0.0108976	-0.535523	-0.548338	127	128	0.172	0.406	Olink	Interleukin-1 receptor-like 2
OPGS001024	DKK3	0.0109042	0.227035	0.219966	11	14	0.051	0.218	Somalogic	Dickkopf-related protein 3
OPGS000947	CTSA	0.010972	0.50205	0.510045	18	18	0.058	0.236	Somalogic	Lysosomal protective protein
OPGS004100	GSDMB	0.0109932	5.00589	4.98689	109	119	0.438	0.664	RNAseq
OPGS006341	AL034550.2	0.011036	0.556516	0.543145	25	27	0.184	0.402	RNAseq
OPGS006916	VAT1	0.0110397	4.52156	4.53282	39	40	0.155	0.387	RNAseq
OPGS012301	EIF2AK3	0.0110705	-0.847835	-0.844191	7	12	0.038	0.136	RNAseq
OPGS005091	FAM241A	0.0111227	1.11753	1.13424	69	69	0.277	0.519	RNAseq
OPGS013246	FAM32A	0.011125	-0.32175	-0.327087	4	4	0.029	0.168	RNAseq
OPGS012286	GPR18	0.0111299	-1.60029	-1.60635	11	11	0.038	0.137	RNAseq
OPGS009160	ZSCAN21	0.011143	0.106649	0.0979147	12	13	0.086	0.289	RNAseq
OPGS016641	EEF1A1	0.0111781	1.71816	1.71511	1	1	0.008	0.057	RNAseq
OPGS016857	RPS6	0.0111781	1.45153	1.44895	1	1	0.007	0.055	RNAseq
OPGS003746	HDDC2	0.0111804	2.26412	2.2477	87	93	0.571	0.747	RNAseq
OPGS006596	SESN1	0.0112332	-3.52798	-3.54081	33	33	0.171	0.322	RNAseq
OPGS012955	AL133243.2	0.011245	-0.264067	-0.258857	17	17	0.031	0.173	RNAseq
[truncated: 14,761 more rows]

## Sheet: Table S9
Table S9: Ankylosing spondylitis case compared with healthy control serum protein analysis.
[truncated: 251 more rows]

[truncated: 5 more sheets: Table S10, Table S11, Table S12, Table S13, Sheet1]
