# Supplementary figures and images for: Multi-omic insights from a multi-ancestry genome-wide meta-analysis of ankylosing spondylitis reveal novel pathways of disease susceptibility
Source: Research Square preprint supplement (doi:10.21203/rs.3.rs-6917334/v1), 2025-07-14

**Figure S4.** Mendelian randomisation analysis of B3GNT2 expression and risk of AS.


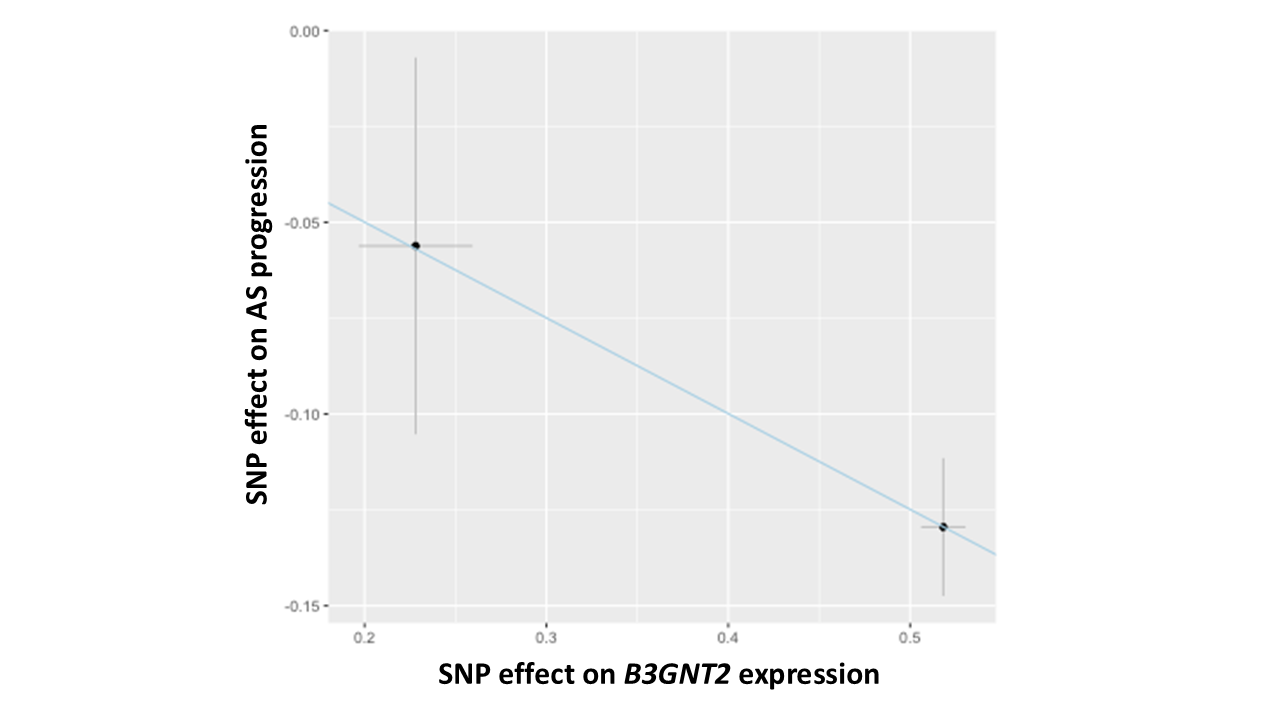

Supplement: Supplementary file 4 [file 38498cfe2ac6c33578ca6daf.docx]

**Figure S5:** GTEX associations of *RTEL1* (rs71325458) and *TERT* (rs4449583) locus SNPs.


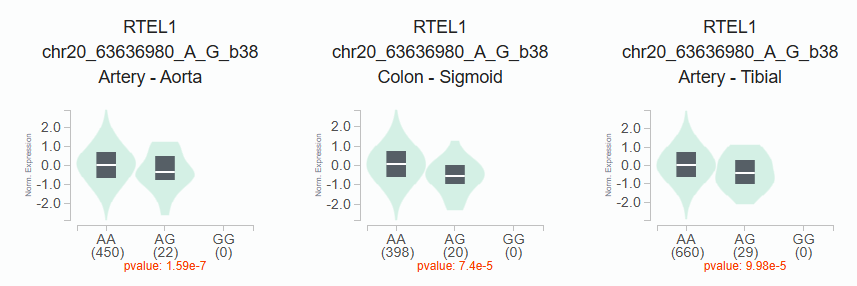


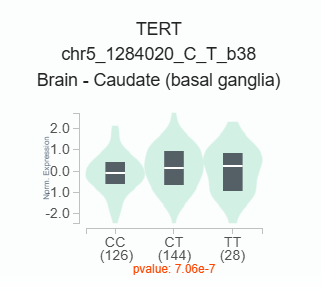

Supplement: Supplementary file 6 [file afc32ab9332ebba823562856.docx]
